# Supplementary material for: A charge-suppressing strategy for probing protein methylation
Source: Royal Society of Chemistry journal article supplement (doi:10.1039/c6cc00814c), 2016-01-01
Supplement: c6cc00814c1.pdf [file c6cc00814c1.pdf]

## Supplemental Information

|                                                                                             |    |
|---------------------------------------------------------------------------------------------|----|
| Supplemental Figures.....                                                                   | 2  |
| Figure S1: .....                                                                            | 2  |
| Figure S2: .....                                                                            | 2  |
| Figure S3: .....                                                                            | 4  |
| Figure S4: .....                                                                            | 5  |
| Figure S5: .....                                                                            | 6  |
| Figure S6: .....                                                                            | 7  |
| Figure S7: .....                                                                            | 7  |
| Figure S8: .....                                                                            | 8  |
| Figure S9: .....                                                                            | 8  |
| Figure S10:.....                                                                            | 9  |
| Figure S11: .....                                                                           | 10 |
| Figure S12: .....                                                                           | 11 |
| Experimental Methods .....                                                                  | 12 |
| Chemicals.....                                                                              | 12 |
| Sample preparation .....                                                                    | 13 |
| Bovine serum albumin methylation .....                                                      | 13 |
| Reaction Reagent preparation .....                                                          | 13 |
| MDA derivatization and optimization.....                                                    | 14 |
| OPA product confirmation.....                                                               | 14 |
| Tandem chemical reaction and SCX fractionation on large scale methylation<br>profiling..... | 15 |
| MS analysis .....                                                                           | 15 |
| Database search for protein identification .....                                            | 16 |
| Bioinformatics analysis .....                                                               | 16 |
| Other Supplemental information.....                                                         | 17 |
| Supplemental table captions.....                                                            | 17 |
| Information of synthesized peptide identification.....                                      | 18 |
| Peptide 1: R.\$EIAQDFK&TDLR#.F .....                                                        | 18 |
| Peptide 2: R.\$EIAQDFK^TDLR#.F .....                                                        | 20 |
| Peptide 3: K.\$QYK@GIIDCVVR#.I .....                                                        | 23 |
| Peptide 4: K.\$QYK^GIIDCVVR#.I.....                                                         | 24 |
| Peptide 5: K.\$MDSTEPPYSQK@R#.Y .....                                                       | 26 |
| References .....                                                                            | 29 |

# Supplemental Figures

**Figure S1:**

The detailed mechanisms involved in the chemical reactions. A: The guanidine group of arginine is blocked by malondialdehyde (MDA) in solution to form the 2-pyrimidinyl ring, with greatly reduced basicity and proton affinity. B: Ortho-phthalaldehyde (OPA) reacts with primary amine in the presence of sulfydryl. The primary product gradually decomposes first into an intermediate, then into a non-fluorescent stable product. C: The 1,1,3,3-Tetramethoxypropane (TMP) is converted into 1,1,3,3-tetra-isopropoxypropane (TiPP) as the source of MDA *in situ* to reduce the ester formation during the reaction with arginine.

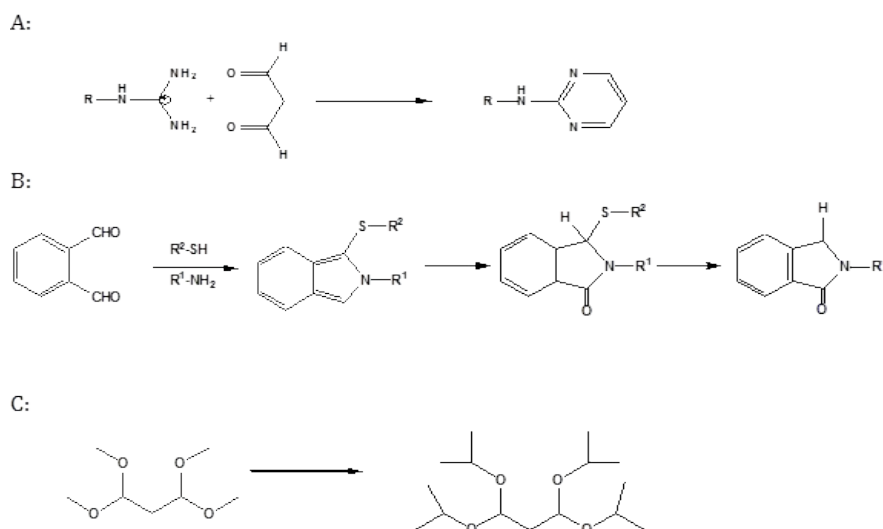

**Figure S2:**

Acetic acid can efficiently suppress protein esterification. Virtual 2D plot of BSA tryptic peptide analysis under different conditions, including BSA only as negative control, BSA+HCl, BSA+HCl+Methanol, BSA+HCl+Methanol+Acetic acid, BSA+HCl+Ethanol, BSA+HCl+Ethanol+Acetic acid. X axis is the retention time, y axis is the m/z. HCl incubation does not bring obvious degradation or modification judging from the 2D map. Acetic acid can efficiently reverse the esterification generated by adding methanol or ethanol.

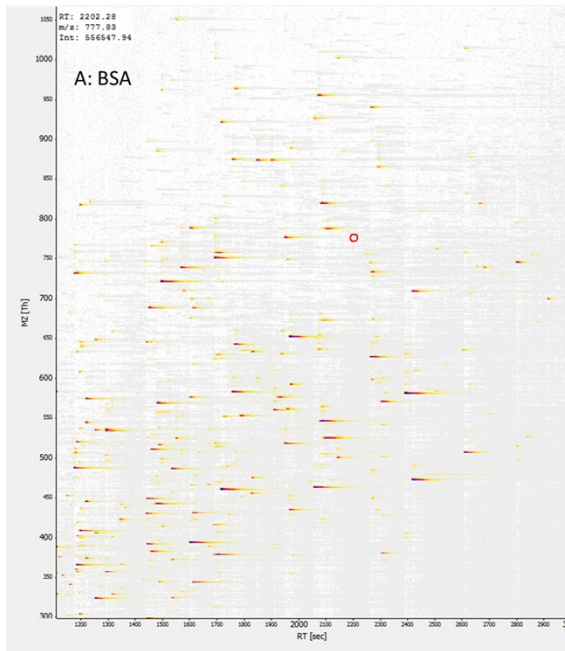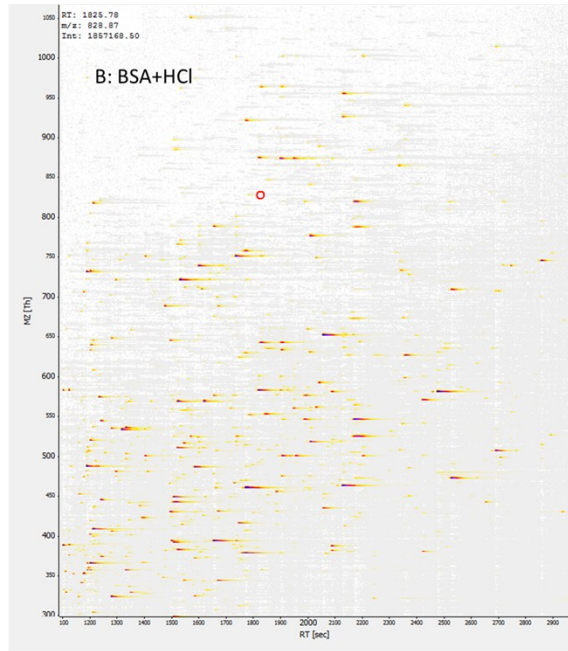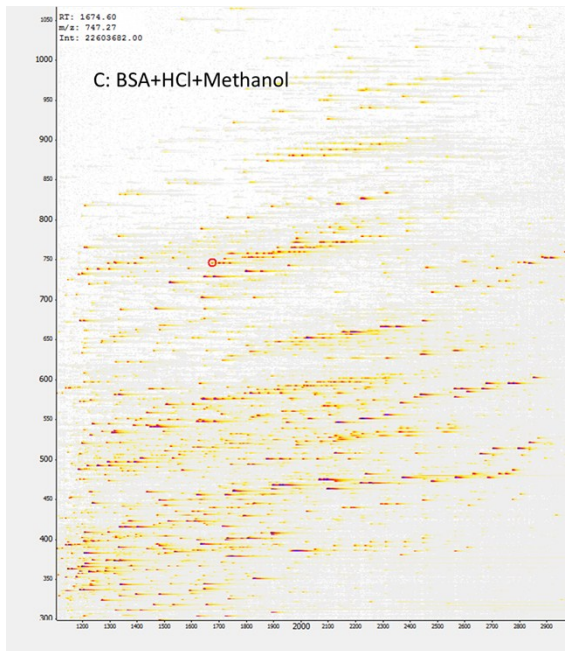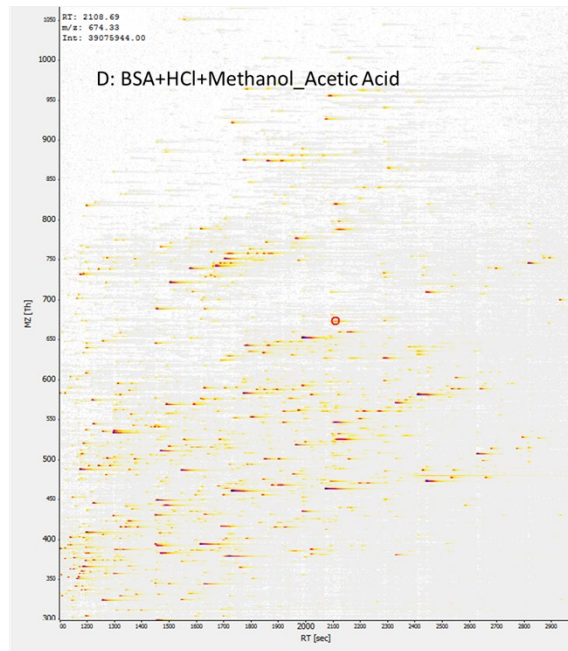

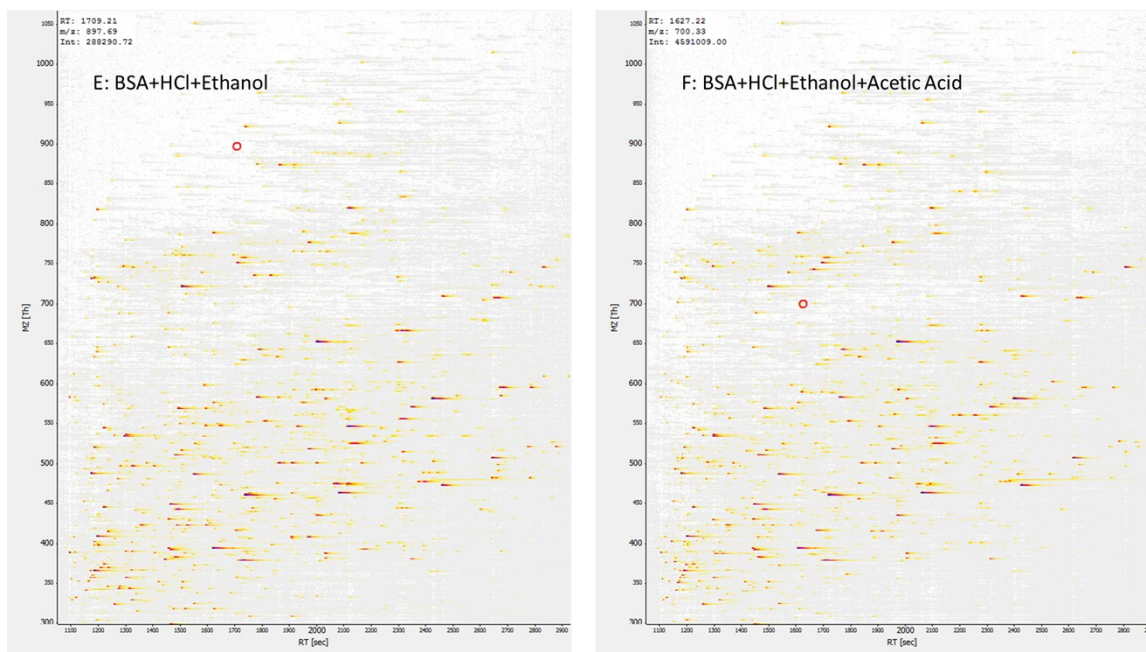

**Figure S3:**

Identification quantification results show excessive acetic acid can effectively suppress esterification. Different ratio between methanol/ethanol and acetic acid (1:1, 1:5, 1:10, 1:20, 1:40) were tested. A: Quantitative result from methyl esterification. B: Quantitative result from ethyl esterification. C: Result for the unmodified peptides.

A:

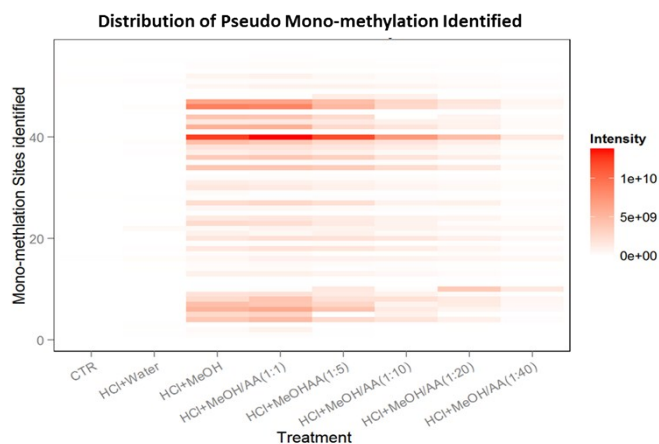

B:

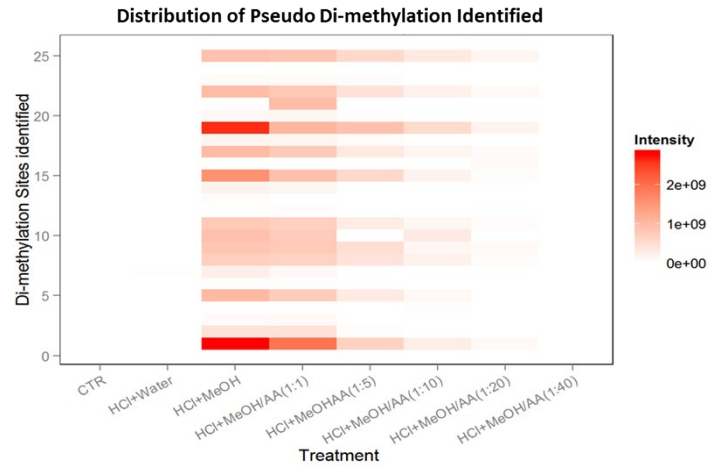

C:

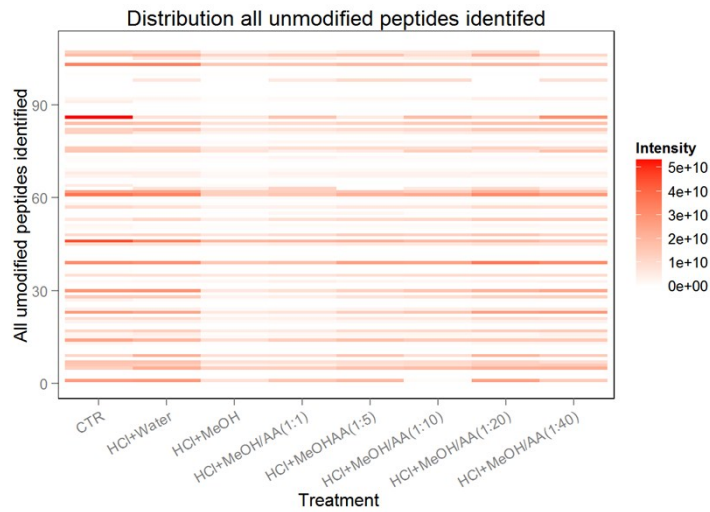

**Figure S4:**

The stability of the OPA reacted peptide product measured by 340nm UV absorbance and fluorescence at 455nm.

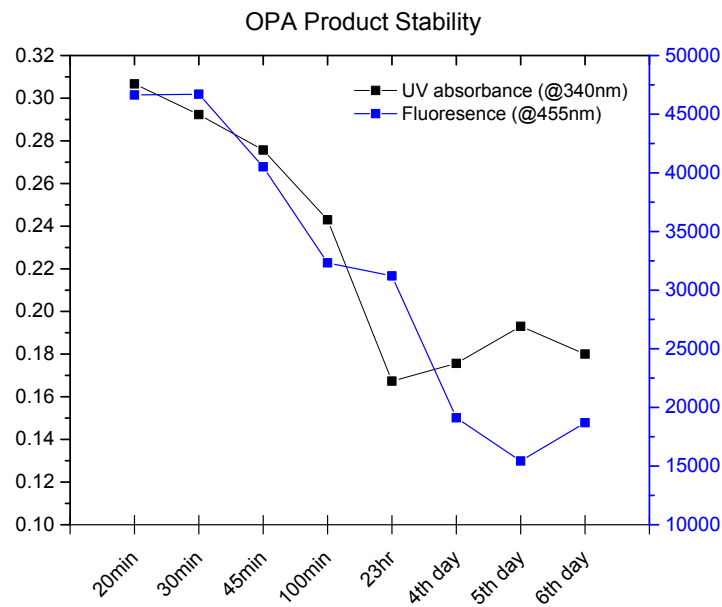

**Figure S5:**

Comparison between percentage of peptides with lysine (K) and arginine (R) as C-terminals from MS identification of regular proteomic profiling and OPA reacted sample. In-gel and In-solution dataset were calculated based on datasets from multiple proteomic experiments using a standard trypsin digestion protocol.

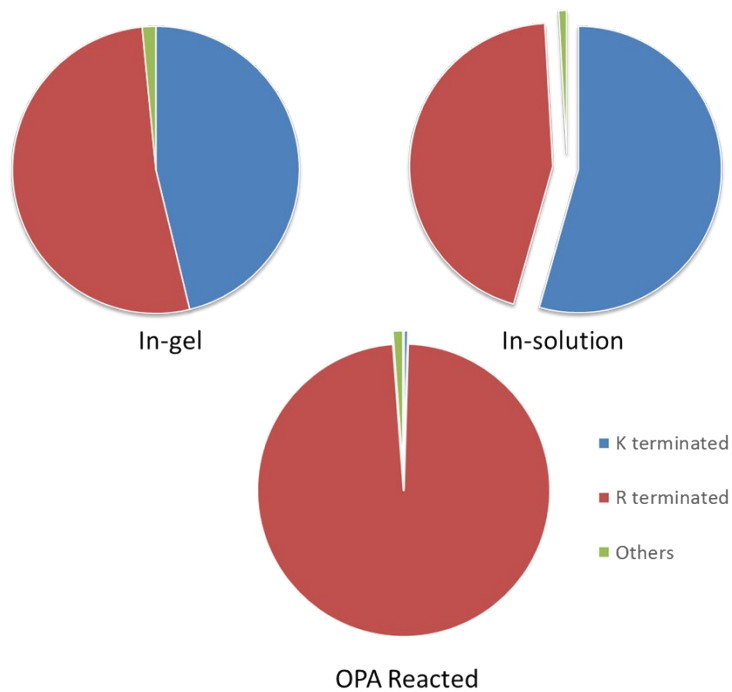

**Figure S6:**

Distribution of the peptide identification from MDA-OPA (A) and negative control experiment (B) for methylation enrichment. The methylated peptides account negligible portion (around 0.1%) of all the peptides identified, compared with the significant enrichment (up to 10%) by the MDA-OPA strategy.

A:

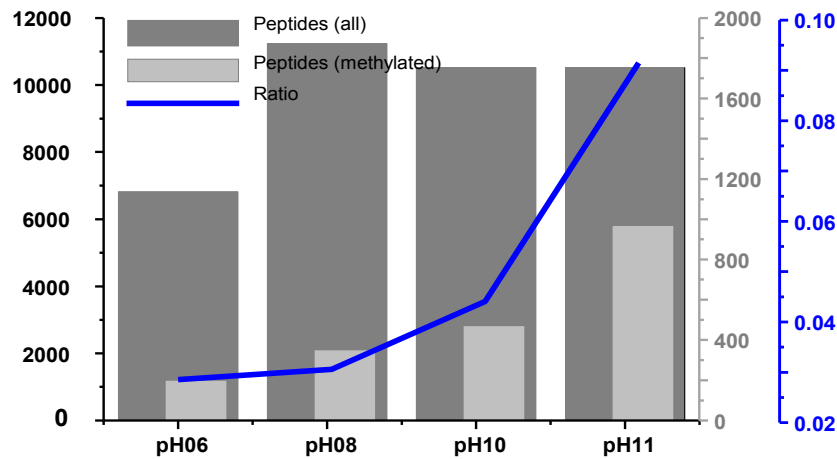

B:

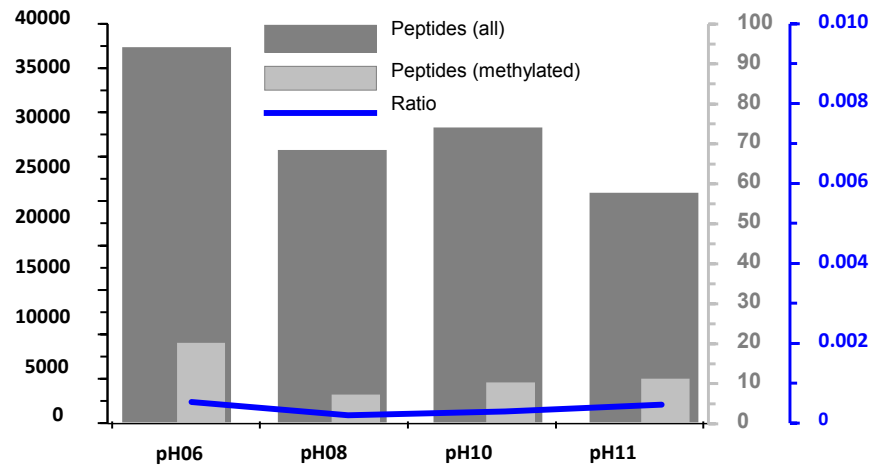

**Figure S7:**

Summary of identified methylation site profile for lysine, arginine, and histidine.



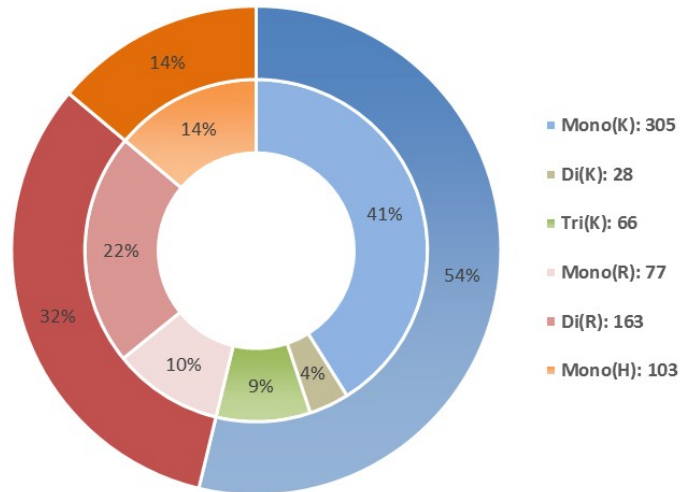

**Figure S8:**

The MS accuracy in ppm for peptide on Q-Exactive from the results reported in this manuscript.

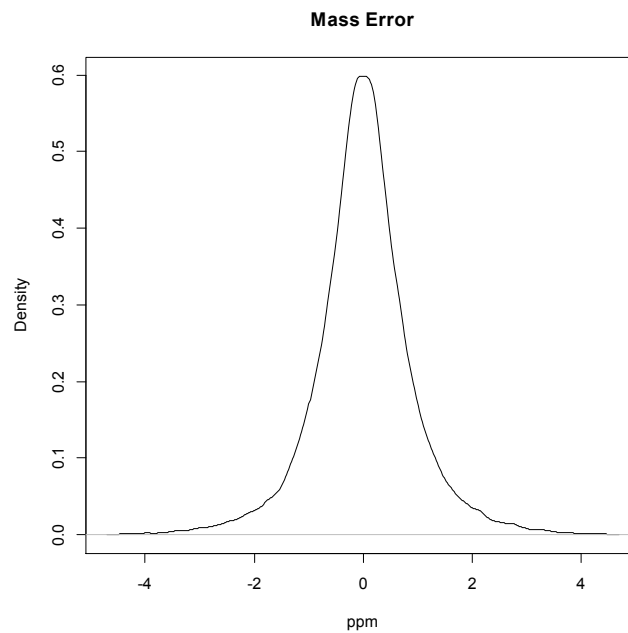

**Figure S9:**

Examples of surface accessibility of methylated amino acid. A: 14-3-3 protein theta (Uniprot: P27348). Red: K3 with trimethylation identified; Green: K49 with mono-



methylation identified; B: Triosephosphate isomerase (Uniprot: P60174). Red: K106 with mono-methylation identified. Green: K212 with mono-methylation identified.

A:

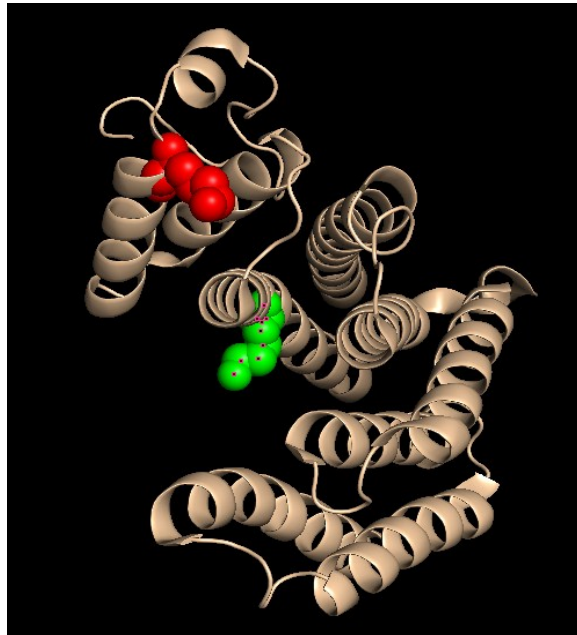

B:

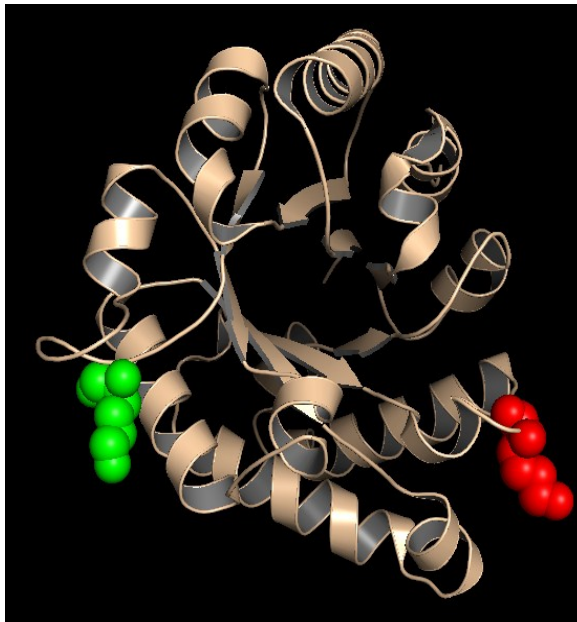

**Figure S10:**

Icelogo visualization of six flanking amino acid around methylation events. Sequences were aligned at methylated amino acid residue in the middle. Over presented (above)

and under presented (under) amino acid are shown against human proteome with  $p < 0.05$ .

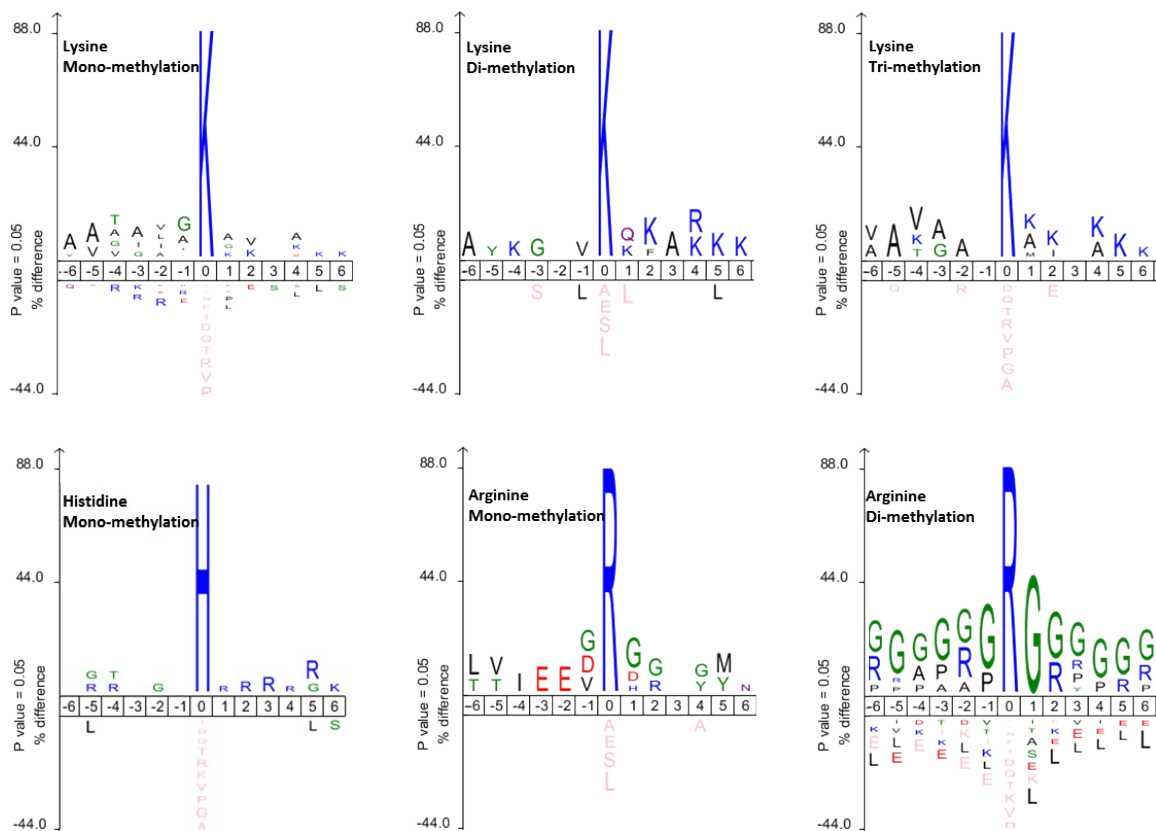

**Figure S11:**

### Pfam protein domain analysis of identified methylated proteins.

A: Lysine methylation

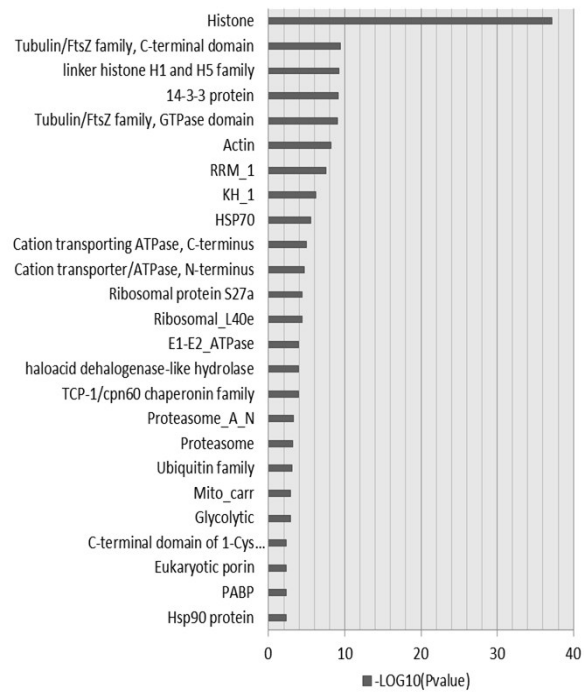

## B: Arginine methylation

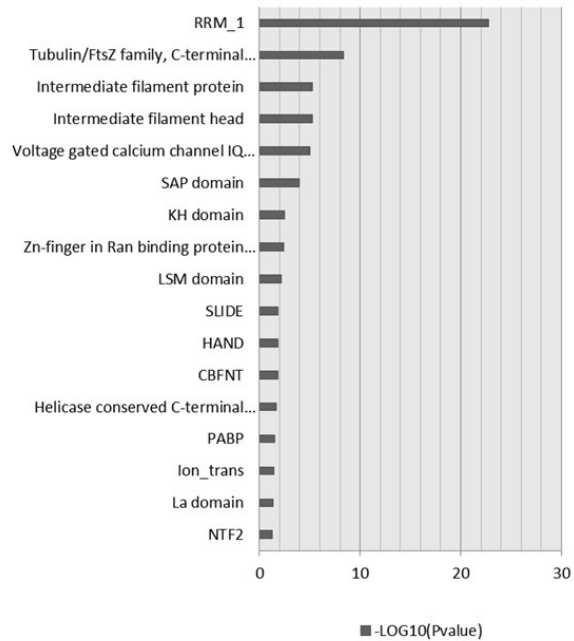

**Figure S12:**

Methylation events overlap on the same amino acid.

#### A: Lysine methylation:

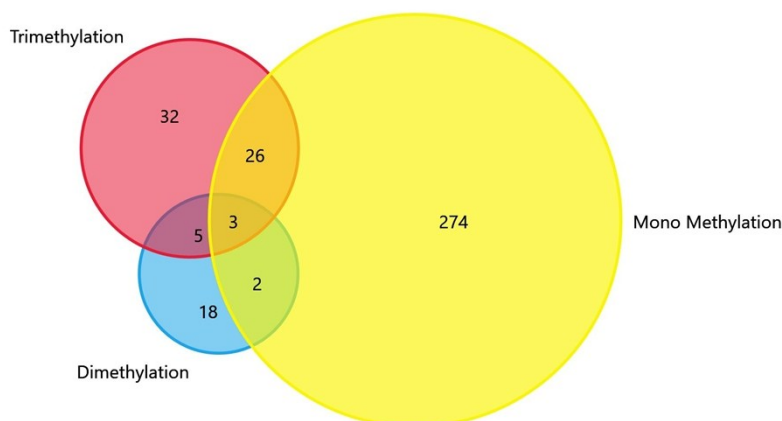

#### B: Arginine methylation

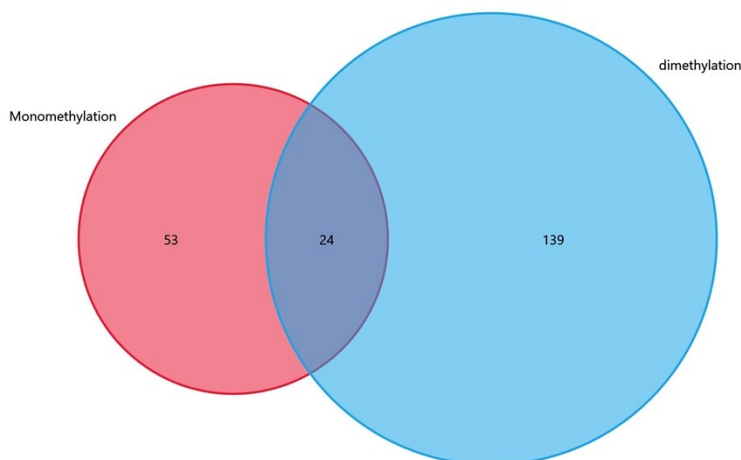

## Experimental Methods

### Chemicals

All standard proteins(beta casein, myoglobin, bovine albumin, alpha casein and lysozyme), 1,1,3,3-tetramethoxypropane, Amberlite IR-120 resin, urea, dithiothreitol (DTT), iodoacetamide (IAA), ammonium bicarbonate (ABC), formic acid (FA), isopropanol, citric acid,  $\beta$ -2-mercatoethanol were obtained from Sigma Aldrich (St. Louis, MO). Water and Acetonitrile (ACN) for HPLC were obtained from JT Baker, Phillipsburg NJ, USA). Trypsin was purchased from Worthington Biochemical Corp (USA). Bio-Rad protein assay kit II (500-0002) and DC protein assay kit II (500-0112) were from Bio-Rad. All of the chemicals were of analytical purity grade except ACN

and FA, which were of HPLC grade. All the water used in the experiment was prepared using a Milli-Q system (Millipore, Bedford, MA).

### Sample preparation

Briefly, HeLa and HEK293 cells were grown to 80% confluence in 15cm dishes and harvested in RIPA buffer (25 mM Tris-HCl (pH 7.6), 150 mM NaCl, 1% NP-40, 1% sodium deoxycholate, 0.5% SDS) after two washes with PBS. Cells were sonicated for 1 min with 20 seconds pulse using 30% power on Sonic Dismembrator 500 w/ Branson 1020 Sonicator (Fisher Scientific) to increase protein recovery. Proteins were precipitated to remove detergent by adding 5X volume of cold acetone overnight followed by two washes with cold acetone as well. The protein pellet was then reconstituted in 8 M urea in 50 mM ammonium bicarbonate (ABC) and quantified by the DC protein assay kit (BioRad). Reduction and alkylation were done by adding dithiothreitol (DTT) to a final concentration of 10 mM at 56°C for 30min followed by 20 mM iodoacetamide (IAA) at room temperature. The solution was then diluted 5 times by 50mM ABC. Digestion was performed by adding trypsin at a protein-enzyme ratio of 50:1, 37 °C overnight, with continuous head-to-end rotating. Digested peptides were then desalted on Sep-Pak C18 SPE column (Waters), aliquoted and dried down by SpeedVac (ThermoFisher Scientific, San Jose, CA).

To confirm the stable product from the OPA reactions, we used a tryptic digest of five standard proteins (beta casein, myoglobin, bovine albumin, alpha casein and lysozyme). The digestion was done with the same protocol as described above for cell lysate digestion. Bovine serum albumin (BSA) tryptic digest was prepared with the same protocol for the MDA derivatization and optimization.

### Bovine serum albumin methylation

BSA for the methylation spike-in was prepared according to the protocols described previously<sup>1</sup>. Briefly, 100 µg BSA protein was dissolved in 2M urea in 50 mM ABC, then reduced by 10 mM DTT at 56°C for 30 min, then alkylated by 20 mM iodoacetamide for 45min in dark. Then the sample was labeled by addition of 20 mM formaldehyde and 10 mM NaCNBH<sub>3</sub> (Sigma Aldrich) for 16 hrs. The labeling reaction was quenched by 100 mM ABC. BSA protein was then precipitated and reconstituted in 1 M urea and aliquoted into 1 µg for spike-in experiment, or digested overnight by trypsin. For BSA methylation spike-in experiment, HeLa lysate was digested along with methylated BSA.

### Reaction Reagent preparation

The synthesis of 1,1,3,3-tetraisopropoxypropane (TiPP) was adapted from Foettinger, A. *et al*<sup>2</sup>. Briefly, Amberlite IR-120 resin (5.5 g, strong cation exchanger,

SCX, HC-form, Sigma) was thoroughly washed with isopropanol to remove the yellow color residue, and 4.95 ml (30 mmol) 1,1,3,3-tetramethoxypropane (Sigma), dissolved in 182 ml (2.4 mol) isopropanol, was added to the resin. The mixture was shaken for 2 hours. The solvent was decanted; the isopropanol and released methanol were then removed by rotary evaporation at 60 °C and the residue was re-dissolved in 182 mL isopropanol and again added to the SCX resin. This whole procedure (shaking, evaporating, re-dissolving) was repeated four times, and approximately 3.5mL of pale yellow TiPP solution was obtained. The solution was aliquoted in amber tubes, stored in -80°C before usage. For the OPA reaction, 1 mL of 10X stock solution of OPA reaction buffer was prepared by adding 5mg OPA (MW:134.13) and 5μL β-2-mercatoethanol (BME, with density of 1.11 g/mL and MW of 78.13, molar ratio of OPA and BME is about 2:1) into 100 μL pure ethanol, then diluted in 900 μL 50 mM carbonate buffer (pH10.5). This stock solution was always freshly made in amber tube.

### MDA derivatization and optimization

Twenty picomolar BSA trypsin digestion was used for each MDA derivatization optimization. Ten microgram Hela digest was used for real sample application. Peptide was incubated with TiPP and HCl at room temperature in dark for 1 hr, then diluted 20X before RP-SPE purification. For the esterification check experiment, 5μl methanol or ethanol, 200μl HCl, along with 5, 10, 50, 100, 200μl acetic acid were tested.

### OPA product confirmation

One milligram of HeLa protein tryptic digest was reacted with the 1X OPA reaction buffer. The product was transferred onto 96-well plate with three replicates, along with 1X OPA reaction buffer and tryptic peptides of the same final concentration in bicarbonate buffer, which was used make the OPA reaction buffer. The UV absorbance at 340nm and the fluorescence at 455nm were recorded over time to monitor the products up to 6 days. Tryptic digest from five standard proteins (as described above) was subjected to the OPA reaction, SCX purification and desalting. To confirm which OPA reaction products can be detected by mass spectrometry, two variable modifications for the intermediate product (C(10)H(8)OS with MW of 176.0295845689, named as OPA-large) and the expected stable product (C(8)H(4)O with MW of 116.0262147505, named as OPA-small) were added as extra variable modification for database searching. The OPA reaction efficiency was tested on 10 μg HeLa digest, using the same protocol described above. The product was desalted and analyzed on LTQ mass spectrometer.

## Tandem chemical reaction and SCX fractionation on large scale methylation profiling

The core chemical modification of the workflow consists of two derivatization reactions on arginine and lysine residues sequentially. The malondialdehyde (MDA) reaction was adapted from Foettinger, A<sup>2</sup>. To exhaust any residual alcohol and provide excessive carboxyl group 70  $\mu$ L acetic acid was mixed with 30  $\mu$ L TiPP and 200  $\mu$ L 12 M HCl for 10 min in room temperature. Five hundred microgram of Hela tryptic digest was mixed with the pre-mixed reaction buffer, vortexed and kept in dark for 1 hr to introduce the MDA modification on un-methylated arginine residues. The solution was then diluted 20 times, and loaded onto activated RP SPE column (50 mg SepPak™, Waters). The column was eluted by 80% ACN with 0.1% formic acid (FA). The eluent was then loaded onto SCX SPE column (50 mg HyperSep™ SCX, Thermo) to remove polymer side products. The SCX column was eluted by 2 mL 50 mM Na<sub>2</sub>CO<sub>3</sub> and 2 mL 50 mM NaOH to recovery the bound peptides. Then 450  $\mu$ L of 10X OPA reaction buffer was added to the 4 mL SCX elution for OPA reaction. The reaction was kept in dark and at room temperature for another 2 hours. After OPA reaction, 5% of FA was used to lower the pH to 3. The solution was then loaded onto an activated SCX SPE column and washed by 80% ACN. Britton & Robinson buffers at different pH (20 mM CH<sub>3</sub>COOH, 20 mM H<sub>3</sub>PO<sub>4</sub>, 20 mM H<sub>3</sub>BO<sub>3</sub>, adjusted to pH 6, 8, 10, 11, 12 by NaOH) were used to elute the peptides off the column sequentially. The eluent was desalted and dried down for MS analysis. The OPA derivatization peptides was also desalted and loaded to online SCX fractionation coupled to MS analysis to minimize sample loss. The online SCX fractionation was achieved by step elution of up to 1M ammonium formate.

## MS analysis

MS platforms used in the current manuscript includes one with Agilent 1100 capillary-HPLC system (Agilent Technologies, Santa Clara, CA, USA) coupled to LTQ-Orbitrap (ThermoFisher Scientific, San Jose, CA), the other with Eksigent Nano-2D plus nano LC (ABSciex) coupled to Q-Exactive (ThermoFisher Scientific, San Jose, CA). All mass spectrometers were equipped with a nano-electrospray interface operated in positive ion mode. The mobile phases consisted of 0.1% (v/v) FA in water as buffer A and 0.1% (v/v) FA in acetonitrile as buffer B. Peptide separation was performed on a 75  $\mu$ m  $\times$  150 mm analytical column packed in-house with reverse phase Magic C18AQ resins (1.9  $\mu$ m; 100-Å pore size; Dr. Maisch GmbH, Ammerbuch, Germany). Dried peptide samples were reconstituted in 20  $\mu$ L 0.5% FA and 4  $\mu$ L was loaded using 98% buffer A at a flow rate of 300 nL/min for 20 min. Then, a gradient from 10% to 50% buffer was performed in 60 min, 120 min or 180 min at a flow rate of ~300 nL/min obtained from splitting a 20  $\mu$ L/min



through a restrictor or directly from the nano-HPLC. The MS method consisted of one full MS scan from 350 to 1,700  $m/z$  followed by 5 data-dependent MS/MS CID scan of the most intense ions in linear ion trap, or 10 HCD MS2 scans on Q-Exactive, with dynamic exclusion repeat count of 2, and a repeat duration of 90s. The resolution of full MS was set 60,000 defined at  $m/z$  400 on LTQ-Orbitrap or 7,500 defined at  $m/z$  200 on Q-Exactive. To improve the mass accuracy, all the measurements in Orbitrap mass analyzer were performed with internal recalibration (“Lock Mass”) at 445.1205.<sup>3</sup> The charge state rejection function was enabled, with single and “unassigned” charge states rejected.

### Database search for protein identification

The database search was done either by MaxQuant 1.3.0.5<sup>4</sup> for quantitative analysis and large scale sample profiling, or Mascot 2.3<sup>5</sup> for quick result readout. The raw files were searched against UniProt protein fasta database (2014, July version), including commonly observed contaminants defined by MaxQuant. For OPA modification efficiency test, we used yeast database plus 5 standard proteins (beta casein, myoglobin, bovine albumin, alpha casein and lysozyme, named as YAL01SD to YAL05SD in the database). Most of the parameters used for both search engines are the same: cysteine carbamidomethylation (+57.021463) was selected as fixed modification; variable modifications were set as follows: methionine oxidation, protein N-terminal acetylation, MDA modification on arginine residue, OPA modification on peptide N-terminal and lysine, mono- and dimethylation on both lysine and arginine residue, trimethylation on lysine residue. Methionine oxidation, protein N-terminal acetylation and MDA modification on arginine residue were set for the MDA reaction efficiency test, while methionine oxidation, protein N-terminal acetylation and OPA on modification on peptide N-terminal and lysine were set for OPA reaction efficiency test. Mono methylation on histidine was also included for histidine methylation. Enzyme specificity was always set to trypsin for all searches. Up to two missing cleavages of trypsin were allowed. Precursor ion mass tolerances were 7 ppm, and fragment ion mass tolerance was 0.5 Da for CID MS/MS spectra, 20 ppm for HCD spectra for MaxQuant search, while 20 mmu for Mascot search. The false discovery rate (FDR) for modified peptide, peptide and protein was all set at 1% and a minimum length of 7 amino acids was used for peptides filtration.

### Bioinformatics analysis

Pfam protein domain analysis is done by DAVID<sup>6</sup>. Consensus sequence analysis was performed with the iceLogo web tool using standard settings<sup>7</sup>. Protein methylation modeling was displayed by PyMOL. NetSurfP<sup>8</sup> was used to calculate the surface accessibility of all the amino acid for identified proteins, defined as buried or exposed. The

enrichment of the methylated amino acid was assessed by the hypergeometric p-values by “phyper” in R (<https://www.r-project.org/>). Public dataset of methylation was downloaded from Uniprot and PhosphositesPlus<sup>9</sup>. UniProt methylation list was extracted from downloaded gff format human database. The unique methylation site was assigned back to all possible proteins, the compared with the format reorganized PhosphositePlus database (only site with definite sites localization information were used) and UniProt database.

To test how much the increased number of variable modifications affected the FDR for methylation identification, protein extract from HEK 293 was processed using our workflow with the exceptions that no MDA-OPA reactions were performed. The MS results were searched with the same parameters which assumed that the chemical modifications are present. Any MSMS spectra matched to a peptide with MDA or OPA modification would therefore represent false positives as the peptides are not chemically modified. In this case, the FDR of MDA-OPA from this background search can be used to estimate the random FDR brought by multiple-variable-modification search for MDA-OPA reaction, as well as other modifications.

## Other Supplemental information

### Supplemental table captions

Please see supplemental file “Supplemental\_tables.xlsx”, for all supplemental tables in different spread sheets:

**Table S1:** MDA efficiency exemplified by unique peptide identification. Peptides with arginine residuals and MDA modification are marked by “+”. Result from MaxQuant search.

**Table S2:** OPA stable product confirmation. Result from MaxQuant search with different forms of OPA modification, OPA-large, OPA-small as detailed in method section.

**Table S3:** BSA di-methylation events identified after reductive demethylation reaction on protein level.

**Table S4:** BSA di-methylation events identified from reductive demethylation reacted BSA spiked in Hela total lysate background.

**Table S5:** High confidence methylation events identified.

### Information of synthesized peptide identification

| ID | Peptide                | Comment          | Validated? | Identified Sequence  |
|----|------------------------|------------------|------------|----------------------|
| 1  | EIAQDFK(mono-meth)TDLR | MONO-methyl on K | yes        | R.\$EIAQDFK&TDLR#.F  |
| 2  | EIAQDFK(tri-meth)TDLR  | tri-methyl on K  | yes        | R.\$EIAQDFK^TDLR#.F  |
| 3  | QYK(Di-meth)GIIDCVVR   | DI-methyl on K   | No         | K.\$QYK@GIIDCVVR#.I  |
| 4  | QYK(tri-meth)GIIDCVVR  | tri-methyl on K  | yes        | K.\$QYK^GIIDCVVR#.I  |
| 5  | MDSTEPPYSQK(Di-meth)R  | DI-methyl on K   | yes        | K.\$MDSTEPPYSQK@R#.Y |

### Peptide 1: R.\$EIAQDFK&TDLR#.F

Spectrum from Large scale ID:

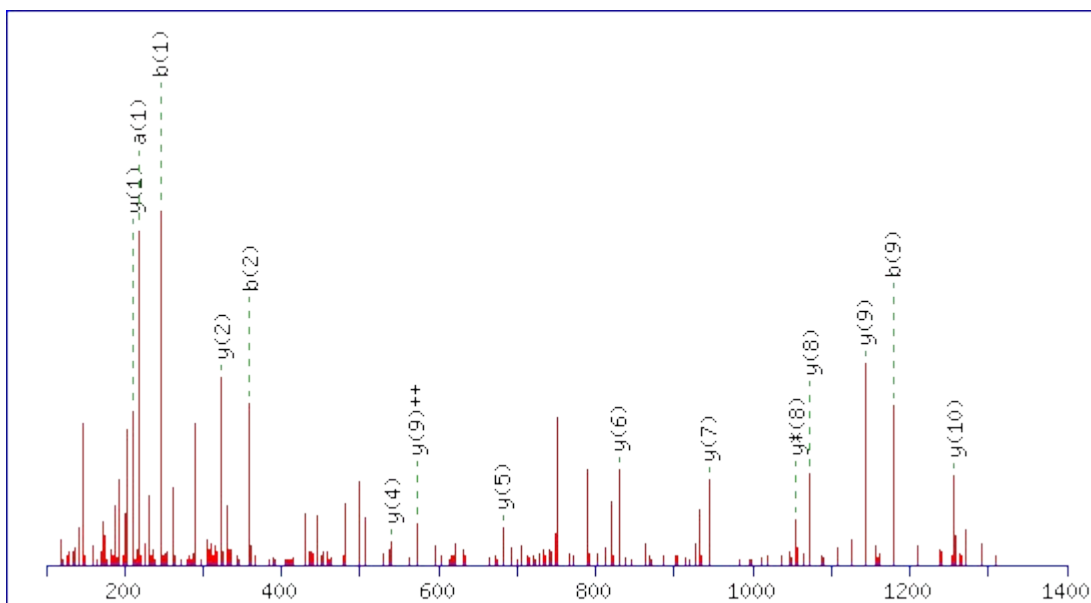

**Monoisotopic mass of neutral peptide Mr(calc): 1500.7249**

**Fixed modifications: Carbamidomethyl (C) (apply to specified residues or termini only)**

**Variable modifications:**

**N-term : OPA (N-term)**

**K7 : Methyl-Mono (K)**

**R11 : MDA (R)**

**Ions Score: 66 Expect: 0.00036**

Matches : 15/108 fragment ions using 24 most intense peaks

| #  | b         | b <sup>++</sup> | b <sup>*</sup> | Seq. | y         | y <sup>++</sup> | y <sup>*</sup> | #  |
|----|-----------|-----------------|----------------|------|-----------|-----------------|----------------|----|
| 1  | 246.0761  | 123.5417        |                | E    |           |                 |                | 11 |
| 2  | 359.1601  | 180.0837        |                | I    | 1256.6634 | 628.8353        | 1239.6368      | 10 |
| 3  | 430.1973  | 215.6023        |                | A    | 1143.5793 | 572.2933        | 1126.5528      | 9  |
| 4  | 558.2558  | 279.6316        | 541.2293       | Q    | 1072.5422 | 536.7747        | 1055.5156      | 8  |
| 5  | 673.2828  | 337.1450        | 656.2562       | D    | 944.4836  | 472.7454        | 927.4571       | 7  |
| 6  | 820.3512  | 410.6792        | 803.3246       | F    | 829.4567  | 415.2320        | 812.4301       | 6  |
| 7  | 962.4618  | 481.7345        | 945.4353       | K    | 682.3883  | 341.6978        | 665.3617       | 5  |
| 8  | 1063.5095 | 532.2584        | 1046.4829      | T    | 540.2776  | 270.6425        | 523.2511       | 4  |
| 9  | 1178.5364 | 589.7719        | 1161.5099      | D    | 439.2300  | 220.1186        | 422.2034       | 3  |
| 10 | 1291.6205 | 646.3139        | 1274.5939      | L    | 324.2030  | 162.6051        | 307.1765       | 2  |
| 11 |           |                 |                | R    | 211.1190  | 106.0631        | 194.0924       | 1  |

Spectrum from Validation:

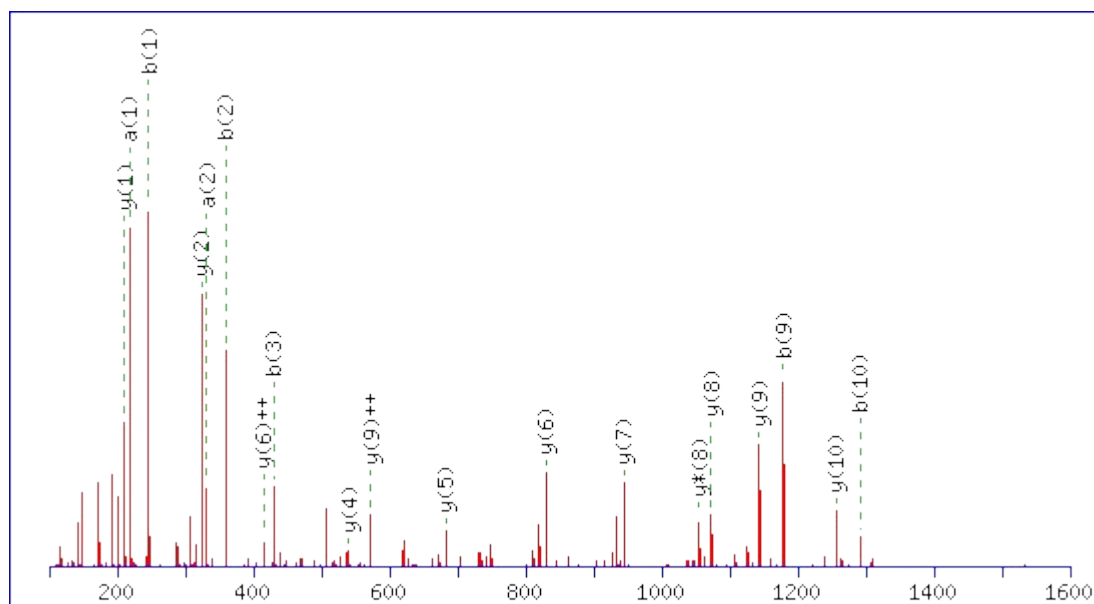

Monoisotopic mass of neutral peptide Mr(calc): 1500.7249

Fixed modifications: Carbamidomethyl (C) (apply to specified residues or termini only)

Variable modifications:

**N-term** : OPA (N-term)

**K7** : Methyl-Mono (KR)

**R11** : MDA (R)

**Ions Score:** 55 **Expect:** 9.2e-005

**Matches** : 19/108 fragment ions using 37 most intense peaks

| #  | b         | b <sup>++</sup> | b <sup>*</sup> | Seq. | y         | y <sup>++</sup> | y <sup>*</sup> | #  |
|----|-----------|-----------------|----------------|------|-----------|-----------------|----------------|----|
| 1  | 246.0761  | 123.5417        |                | E    |           |                 |                | 11 |
| 2  | 359.1601  | 180.0837        |                | I    | 1256.6634 | 628.8353        | 1239.6368      | 10 |
| 3  | 430.1973  | 215.6023        |                | A    | 1143.5793 | 572.2933        | 1126.5528      | 9  |
| 4  | 558.2558  | 279.6316        | 541.2293       | Q    | 1072.5422 | 536.7747        | 1055.5156      | 8  |
| 5  | 673.2828  | 337.1450        | 656.2562       | D    | 944.4836  | 472.7454        | 927.4571       | 7  |
| 6  | 820.3512  | 410.6792        | 803.3246       | F    | 829.4567  | 415.2320        | 812.4301       | 6  |
| 7  | 962.4618  | 481.7345        | 945.4353       | K    | 682.3883  | 341.6978        | 665.3617       | 5  |
| 8  | 1063.5095 | 532.2584        | 1046.4829      | T    | 540.2776  | 270.6425        | 523.2511       | 4  |
| 9  | 1178.5364 | 589.7719        | 1161.5099      | D    | 439.2300  | 220.1186        | 422.2034       | 3  |
| 10 | 1291.6205 | 646.3139        | 1274.5939      | L    | 324.2030  | 162.6051        | 307.1765       | 2  |
| 11 |           |                 |                | R    | 211.1190  | 106.0631        | 194.0924       | 1  |

**Peptide 2: R.\$EIAQDFK<sup>^</sup>TDLR#.F**

**Spectrum from Large scale ID:**

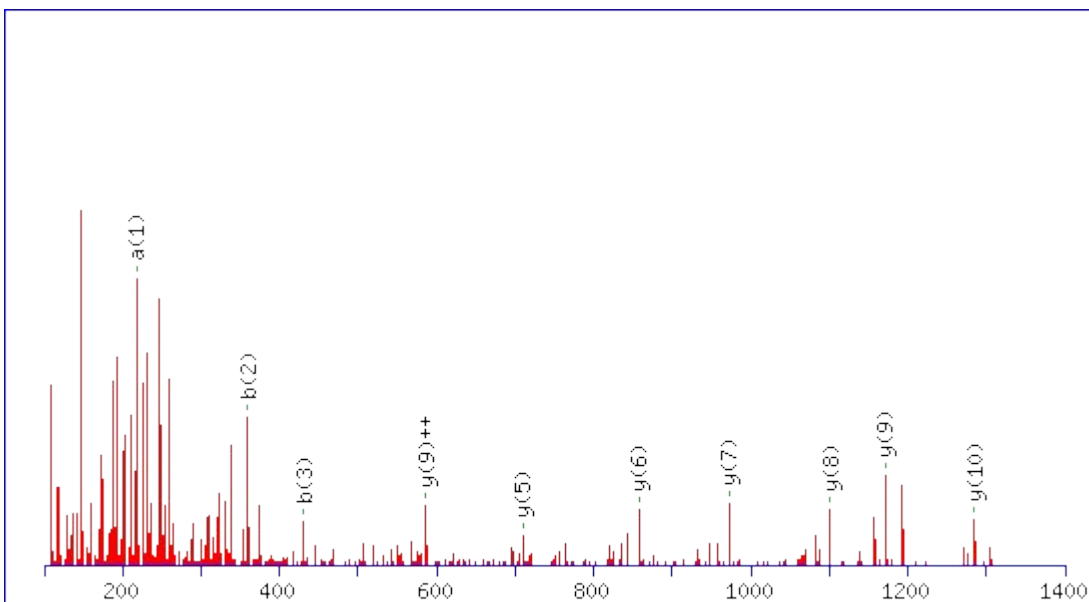

**Monoisotopic mass of neutral peptide Mr(calc): 1528.7562**

**Fixed modifications: Carbamidomethyl (C) (apply to specified residues or termini only)**

**Variable modifications:**

**N-term : OPA (N-term)**

**K7 : Methyl-Tri (K)**

**R11 : MDA (R)**

**Ions Score: 44 Expect: 0.066**

**Matches : 10/108 fragment ions using 12 most intense peaks**

| #  | b         | b <sup>++</sup> | b <sup>*</sup> | Seq. | y         | y <sup>++</sup> | y <sup>*</sup> | #  |
|----|-----------|-----------------|----------------|------|-----------|-----------------|----------------|----|
| 1  | 246.0761  | 123.5417        |                | E    |           |                 |                | 11 |
| 2  | 359.1601  | 180.0837        |                | I    | 1284.6947 | 642.8510        | 1267.6681      | 10 |
| 3  | 430.1973  | 215.6023        |                | A    | 1171.6106 | 586.3089        | 1154.5841      | 9  |
| 4  | 558.2558  | 279.6316        | 541.2293       | Q    | 1100.5735 | 550.7904        | 1083.5469      | 8  |
| 5  | 673.2828  | 337.1450        | 656.2562       | D    | 972.5149  | 486.7611        | 955.4884       | 7  |
| 6  | 820.3512  | 410.6792        | 803.3246       | F    | 857.4880  | 429.2476        | 840.4614       | 6  |
| 7  | 990.4931  | 495.7502        | 973.4666       | K    | 710.4196  | 355.7134        | 693.3930       | 5  |
| 8  | 1091.5408 | 546.2740        | 1074.5142      | T    | 540.2776  | 270.6425        | 523.2511       | 4  |
| 9  | 1206.5677 | 603.7875        | 1189.5412      | D    | 439.2300  | 220.1186        | 422.2034       | 3  |
| 10 | 1319.6518 | 660.3295        | 1302.6252      | L    | 324.2030  | 162.6051        | 307.1765       | 2  |
| 11 |           |                 |                | R    | 211.1190  | 106.0631        | 194.0924       | 1  |

## Spectrum from Validation:

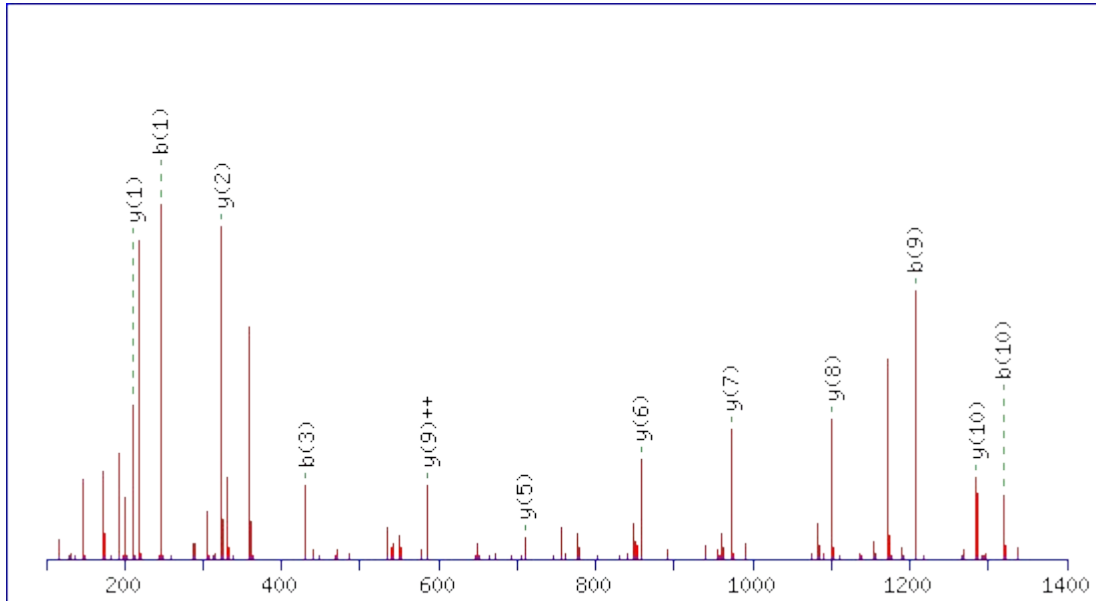

**Monoisotopic mass of neutral peptide Mr(calc):** 1528.7562

**Fixed modifications:** Carbamidomethyl (C) (apply to specified residues or termini only)

**Variable modifications:**

**N-term :** OPA (N-term)

**K7 :** Methyl-Tri (K)

**R11 :** MDA (R)

**Ions Score:** 64 **Expect:** 0.00015

**Matches :** 12/108 fragment ions using 13 most intense peaks

| #  | b         | b <sup>++</sup> | b <sup>*</sup> | Seq. | y         | y <sup>++</sup> | y <sup>*</sup> | #  |
|----|-----------|-----------------|----------------|------|-----------|-----------------|----------------|----|
| 1  | 246.0761  | 123.5417        |                | E    |           |                 |                | 11 |
| 2  | 359.1601  | 180.0837        |                | I    | 1284.6947 | 642.8510        | 1267.6681      | 10 |
| 3  | 430.1973  | 215.6023        |                | A    | 1171.6106 | 586.3089        | 1154.5841      | 9  |
| 4  | 558.2558  | 279.6316        | 541.2293       | Q    | 1100.5735 | 550.7904        | 1083.5469      | 8  |
| 5  | 673.2828  | 337.1450        | 656.2562       | D    | 972.5149  | 486.7611        | 955.4884       | 7  |
| 6  | 820.3512  | 410.6792        | 803.3246       | F    | 857.4880  | 429.2476        | 840.4614       | 6  |
| 7  | 990.4931  | 495.7502        | 973.4666       | K    | 710.4196  | 355.7134        | 693.3930       | 5  |
| 8  | 1091.5408 | 546.2740        | 1074.5142      | T    | 540.2776  | 270.6425        | 523.2511       | 4  |
| 9  | 1206.5677 | 603.7875        | 1189.5412      | D    | 439.2300  | 220.1186        | 422.2034       | 3  |
| 10 | 1319.6518 | 660.3295        | 1302.6252      | L    | 324.2030  | 162.6051        | 307.1765       | 2  |



|    |  |  |  |   |          |          |          |   |
|----|--|--|--|---|----------|----------|----------|---|
| 11 |  |  |  | R | 211.1190 | 106.0631 | 194.0924 | 1 |
|----|--|--|--|---|----------|----------|----------|---|

## Peptide 3: K.\$QYK@GIIDCVVR#.I

Spectrum from Large scale ID:

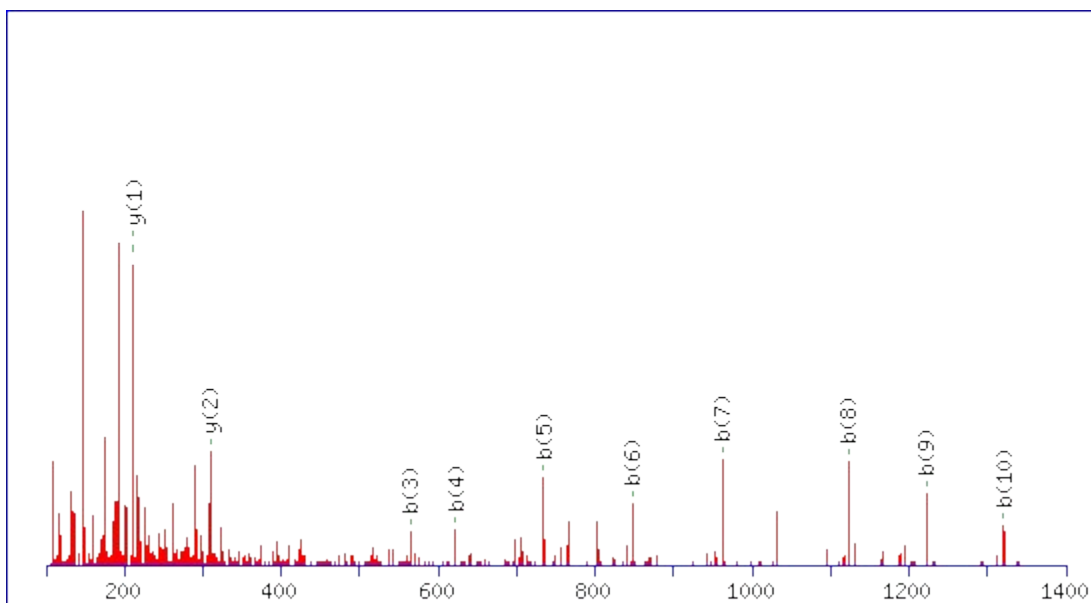

Monoisotopic mass of neutral peptide Mr(calc): 1529.7701

Fixed modifications: Carbamidomethyl (C) (apply to specified residues or termini only)

Variable modifications:

N-term : OPA (N-term)

K3 : Methyl-Di (K)

R11 : MDA (R)

Ions Score: 66 Expect: 0.00054

Matches : 10/120 fragment ions using 13 most intense peaks

| # | b        | b <sup>++</sup> | b <sup>*</sup> | Seq. | y         | y <sup>++</sup> | y <sup>*</sup> | #  |
|---|----------|-----------------|----------------|------|-----------|-----------------|----------------|----|
| 1 | 245.0921 | 123.0497        | 228.0655       | Q    |           |                 |                | 11 |
| 2 | 408.1554 | 204.5813        | 391.1288       | Y    | 1286.6926 | 643.8499        | 1269.6660      | 10 |
| 3 | 564.2817 | 282.6445        | 547.2551       | K    | 1123.6292 | 562.3183        | 1106.6027      | 9  |
| 4 | 621.3031 | 311.1552        | 604.2766       | G    | 967.5030  | 484.2551        | 950.4764       | 8  |
| 5 | 734.3872 | 367.6972        | 717.3606       | I    | 910.4815  | 455.7444        | 893.4550       | 7  |

|    |           |          |           |   |          |          |          |   |
|----|-----------|----------|-----------|---|----------|----------|----------|---|
| 6  | 847.4713  | 424.2393 | 830.4447  | I | 797.3974 | 399.2024 | 780.3709 | 6 |
| 7  | 962.4982  | 481.7527 | 945.4716  | D | 684.3134 | 342.6603 | 667.2868 | 5 |
| 8  | 1122.5288 | 561.7681 | 1105.5023 | C | 569.2864 | 285.1469 | 552.2599 | 4 |
| 9  | 1221.5973 | 611.3023 | 1204.5707 | V | 409.2558 | 205.1315 | 392.2292 | 3 |
| 10 | 1320.6657 | 660.8365 | 1303.6391 | V | 310.1874 | 155.5973 | 293.1608 | 2 |
| 11 |           |          |           | R | 211.1190 | 106.0631 | 194.0924 | 1 |

## Peptide 4: K.\$QYK^GIIDCVVR#.I

Spectrum from Large scale ID:

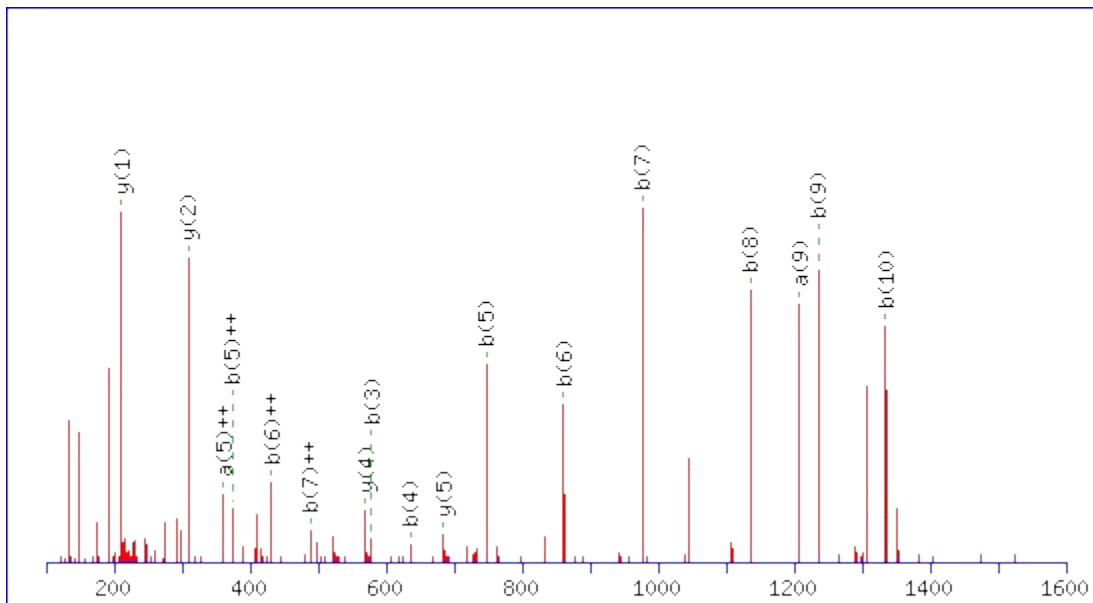

Monoisotopic mass of neutral peptide Mr(calc): 1543.7857

Fixed modifications: Carbamidomethyl (C) (apply to specified residues or termini only)

Variable modifications:

N-term : OPA (N-term)

K3 : Methyl-Tri (K)

R11 : MDA (R)

Ions Score: 53 Expect: 0.012

Matches : 17/120 fragment ions using 28 most intense peaks

| # | b        | b <sup>++</sup> | b <sup>*</sup> | Seq. | y | y <sup>++</sup> | y <sup>*</sup> | #  |
|---|----------|-----------------|----------------|------|---|-----------------|----------------|----|
| 1 | 245.0921 | 123.0497        | 228.0655       | Q    |   |                 |                | 11 |

|    |           |          |           |   |           |          |           |    |
|----|-----------|----------|-----------|---|-----------|----------|-----------|----|
| 2  | 408.1554  | 204.5813 | 391.1288  | Y | 1300.7082 | 650.8577 | 1283.6817 | 10 |
| 3  | 578.2973  | 289.6523 | 561.2708  | K | 1137.6449 | 569.3261 | 1120.6183 | 9  |
| 4  | 635.3188  | 318.1630 | 618.2922  | G | 967.5030  | 484.2551 | 950.4764  | 8  |
| 5  | 748.4028  | 374.7051 | 731.3763  | I | 910.4815  | 455.7444 | 893.4550  | 7  |
| 6  | 861.4869  | 431.2471 | 844.4604  | I | 797.3974  | 399.2024 | 780.3709  | 6  |
| 7  | 976.5138  | 488.7606 | 959.4873  | D | 684.3134  | 342.6603 | 667.2868  | 5  |
| 8  | 1136.5445 | 568.7759 | 1119.5179 | C | 569.2864  | 285.1469 | 552.2599  | 4  |
| 9  | 1235.6129 | 618.3101 | 1218.5864 | V | 409.2558  | 205.1315 | 392.2292  | 3  |
| 10 | 1334.6813 | 667.8443 | 1317.6548 | V | 310.1874  | 155.5973 | 293.1608  | 2  |
| 11 |           |          |           | R | 211.1190  | 106.0631 | 194.0924  | 1  |

### Spectrum from Validation:

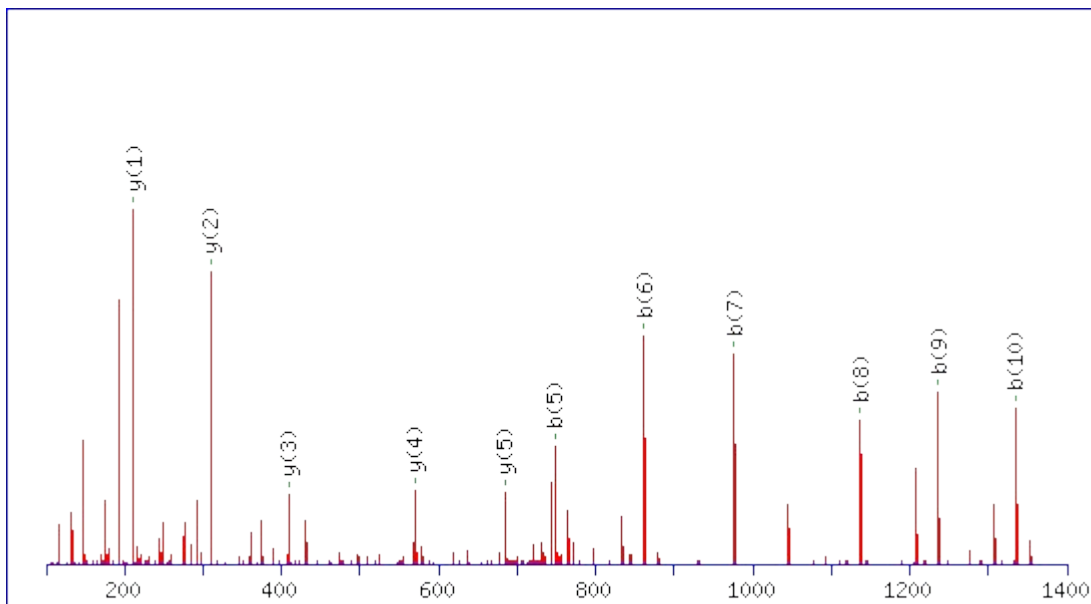

**Monoisotopic mass of neutral peptide Mr(calc):** 1543.7857

**Fixed modifications:** Carbamidomethyl (C) (apply to specified residues or termini only)

**Variable modifications:**

**N-term :** OPA (N-term)

**K3 :** Methyl-Tri (K)

**R11 :** MDA (R)

**Ions Score:** 48 **Expect:** 0.0021

**Matches :** 11/120 fragment ions using 13 most intense peaks

| #  | b                | b <sup>++</sup> | b <sup>*</sup> | Seq. | y               | y <sup>++</sup> | y <sup>*</sup> | #  |
|----|------------------|-----------------|----------------|------|-----------------|-----------------|----------------|----|
| 1  | 245.0921         | 123.0497        | 228.0655       | Q    |                 |                 |                | 11 |
| 2  | 408.1554         | 204.5813        | 391.1288       | Y    | 1300.7082       | 650.8577        | 1283.6817      | 10 |
| 3  | 578.2973         | 289.6523        | 561.2708       | K    | 1137.6449       | 569.3261        | 1120.6183      | 9  |
| 4  | 635.3188         | 318.1630        | 618.2922       | G    | 967.5030        | 484.2551        | 950.4764       | 8  |
| 5  | <b>748.4028</b>  | 374.7051        | 731.3763       | I    | 910.4815        | 455.7444        | 893.4550       | 7  |
| 6  | <b>861.4869</b>  | 431.2471        | 844.4604       | I    | 797.3974        | 399.2024        | 780.3709       | 6  |
| 7  | <b>976.5138</b>  | 488.7606        | 959.4873       | D    | <b>684.3134</b> | 342.6603        | 667.2868       | 5  |
| 8  | <b>1136.5445</b> | 568.7759        | 1119.5179      | C    | <b>569.2864</b> | 285.1469        | 552.2599       | 4  |
| 9  | <b>1235.6129</b> | 618.3101        | 1218.5864      | V    | <b>409.2558</b> | 205.1315        | 392.2292       | 3  |
| 10 | <b>1334.6813</b> | 667.8443        | 1317.6548      | V    | <b>310.1874</b> | 155.5973        | 293.1608       | 2  |
| 11 |                  |                 |                | R    | <b>211.1190</b> | 106.0631        | 194.0924       | 1  |

## Peptide 5: K.\$MDSTEPPYSQK@R#.Y

Spectrum from Large scale ID:

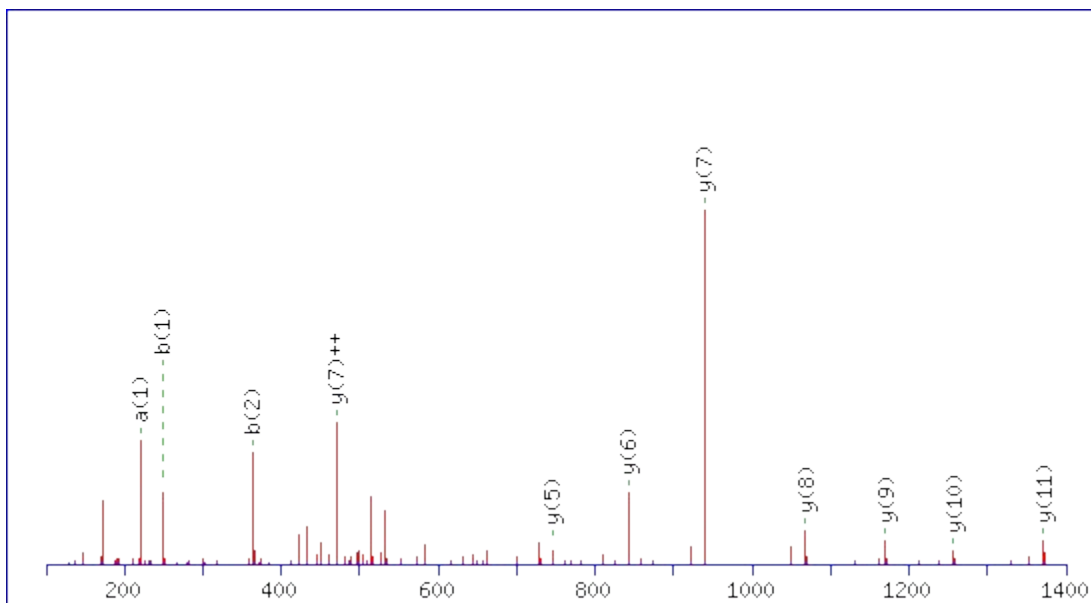

Monoisotopic mass of neutral peptide Mr(calc): 1617.7133

Fixed modifications: Carbamidomethyl (C) (apply to specified residues or termini only)

Variable modifications:

N-term : OPA (N-term)

K11 : Methyl-Di (K)

R12 : MDA (R)

Ions Score: 60 Expect: 0.00043

Matches : 11/96 fragment ions using 13 most intense peaks

| #  | b         | b <sup>++</sup> | b <sup>*</sup> | Seq. | y         | y <sup>++</sup> | y <sup>*</sup> | #  |
|----|-----------|-----------------|----------------|------|-----------|-----------------|----------------|----|
| 1  | 248.0740  | 124.5406        |                | M    |           |                 |                | 12 |
| 2  | 363.1009  | 182.0541        |                | D    | 1371.6539 | 686.3306        | 1354.6274      | 11 |
| 3  | 450.1329  | 225.5701        |                | S    | 1256.6270 | 628.8171        | 1239.6004      | 10 |
| 4  | 551.1806  | 276.0940        |                | T    | 1169.5950 | 585.3011        | 1152.5684      | 9  |
| 5  | 680.2232  | 340.6152        |                | E    | 1068.5473 | 534.7773        | 1051.5207      | 8  |
| 6  | 777.2760  | 389.1416        |                | P    | 939.5047  | 470.2560        | 922.4781       | 7  |
| 7  | 874.3287  | 437.6680        |                | P    | 842.4519  | 421.7296        | 825.4254       | 6  |
| 8  | 1037.3921 | 519.1997        |                | Y    | 745.3992  | 373.2032        | 728.3726       | 5  |
| 9  | 1124.4241 | 562.7157        |                | S    | 582.3358  | 291.6715        | 565.3093       | 4  |
| 10 | 1252.4827 | 626.7450        | 1235.4561      | Q    | 495.3038  | 248.1555        | 478.2772       | 3  |
| 11 | 1408.6089 | 704.8081        | 1391.5824      | K    | 367.2452  | 184.1262        | 350.2187       | 2  |
| 12 |           |                 |                | R    | 211.1190  | 106.0631        | 194.0924       | 1  |

### Spectrum from Validation:

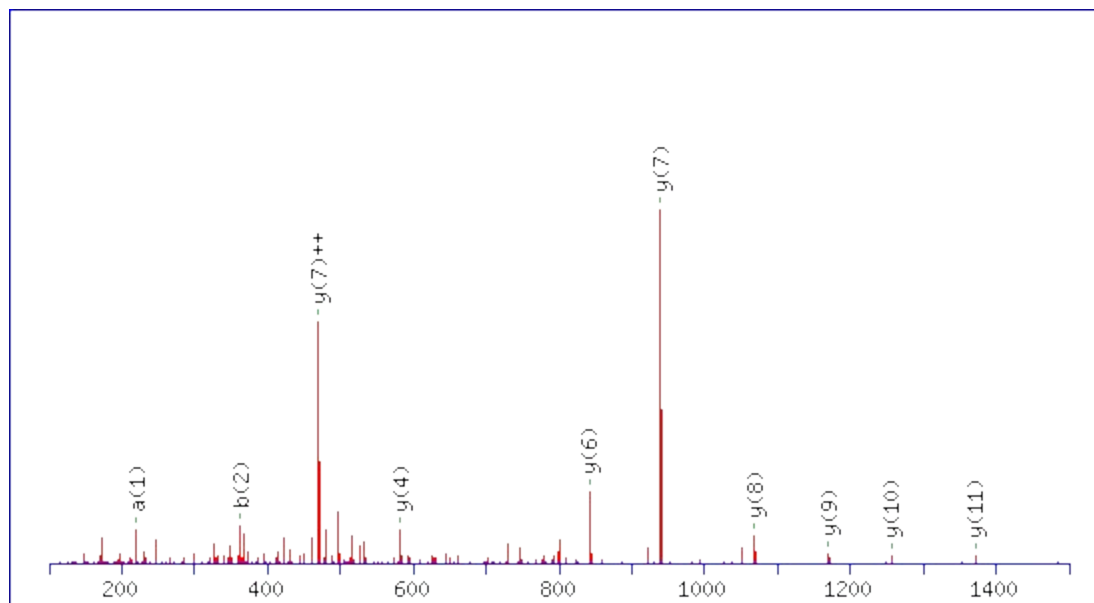

Monoisotopic mass of neutral peptide Mr(calc): 1617.7133

**Fixed modifications:** Carbamidomethyl (C) (apply to specified residues or termini only)

**Variable modifications:**

**N-term :** OPA (N-term)

**K11 :** Methyl-Di (KR)

**R12 :** MDA (R)

**Ions Score:** 52 **Expect:** 1.3e-005

**Matches :** 10/96 fragment ions using 14 most intense peaks

| #  | b         | b <sup>++</sup> | b <sup>*</sup> | Seq. | y         | y <sup>++</sup> | y <sup>*</sup> | #  |
|----|-----------|-----------------|----------------|------|-----------|-----------------|----------------|----|
| 1  | 248.0740  | 124.5406        |                | M    |           |                 |                | 12 |
| 2  | 363.1009  | 182.0541        |                | D    | 1371.6539 | 686.3306        | 1354.6274      | 11 |
| 3  | 450.1329  | 225.5701        |                | S    | 1256.6270 | 628.8171        | 1239.6004      | 10 |
| 4  | 551.1806  | 276.0940        |                | T    | 1169.5950 | 585.3011        | 1152.5684      | 9  |
| 5  | 680.2232  | 340.6152        |                | E    | 1068.5473 | 534.7773        | 1051.5207      | 8  |
| 6  | 777.2760  | 389.1416        |                | P    | 939.5047  | 470.2560        | 922.4781       | 7  |
| 7  | 874.3287  | 437.6680        |                | P    | 842.4519  | 421.7296        | 825.4254       | 6  |
| 8  | 1037.3921 | 519.1997        |                | Y    | 745.3992  | 373.2032        | 728.3726       | 5  |
| 9  | 1124.4241 | 562.7157        |                | S    | 582.3358  | 291.6715        | 565.3093       | 4  |
| 10 | 1252.4827 | 626.7450        | 1235.4561      | Q    | 495.3038  | 248.1555        | 478.2772       | 3  |
| 11 | 1408.6089 | 704.8081        | 1391.5824      | K    | 367.2452  | 184.1262        | 350.2187       | 2  |
| 12 |           |                 |                | R    | 211.1190  | 106.0631        | 194.0924       | 1  |

## References

1. O. Kleifeld, A. Doucet, U. auf dem Keller, A. Prudova, O. Schilling, R. K. Kainthan, A. E. Starr, L. J. Foster, J. N. Kizhakkedathu and C. M. Overall, *Nat Biotechnol*, 2010, **28**, 281-288.
2. A. Foettinger, A. Leitner and W. Lindner, *J Mass Spectrom*, 2006, **41**, 623-632.
3. J. V. Olsen, L. M. de Godoy, G. Li, B. Macek, P. Mortensen, R. Pesch, A. Makarov, O. Lange, S. Horning and M. Mann, *Mol Cell Proteomics*, 2005, **4**, 2010-2021.
4. J. Cox and M. Mann, *Nat Biotechnol*, 2008, **26**, 1367-1372.
5. D. N. Perkins, D. J. Pappin, D. M. Creasy and J. S. Cottrell, *Electrophoresis*, 1999,

- 20**, 3551-3567.
6. W. Huang da, B. T. Sherman and R. A. Lempicki, *Nature protocols*, 2009, **4**, 44-57.
7. N. Colaert, K. Helsens, L. Martens, J. Vandekerckhove and K. Gevaert, *Nat Methods*, 2009, **6**, 786-787.
8. B. Petersen, T. N. Petersen, P. Andersen, M. Nielsen and C. Lundegaard, *BMC Struct Biol*, 2009, **9**, 51.
9. P. V. Hornbeck, J. M. Kornhauser, S. Tkachev, B. Zhang, E. Skrzypek, B. Murray, V. Latham and M. Sullivan, *Nucleic Acids Res*, 2012, **40**, D261-270.
1. O. Kleifeld, A. Doucet, U. auf dem Keller, A. Prudova, O. Schilling, R. K. Kainthan, A. E. Starr, L. J. Foster, J. N. Kizhakkedathu and C. M. Overall, *Nat Biotechnol*, 2010, **28**, 281-288.
2. A. Foettinger, A. Leitner and W. Lindner, *J Mass Spectrom*, 2006, **41**, 623-632.
3. J. V. Olsen, L. M. de Godoy, G. Li, B. Macek, P. Mortensen, R. Pesch, A. Makarov, O. Lange, S. Horning and M. Mann, *Mol Cell Proteomics*, 2005, **4**, 2010-2021.
4. J. Cox and M. Mann, *Nat Biotechnol*, 2008, **26**, 1367-1372.
5. D. N. Perkins, D. J. Pappin, D. M. Creasy and J. S. Cottrell, *Electrophoresis*, 1999, **20**, 3551-3567.
6. W. Huang da, B. T. Sherman and R. A. Lempicki, *Nature protocols*, 2009, **4**, 44-57.
7. N. Colaert, K. Helsens, L. Martens, J. Vandekerckhove and K. Gevaert, *Nat Methods*, 2009, **6**, 786-787.
8. B. Petersen, T. N. Petersen, P. Andersen, M. Nielsen and C. Lundegaard, *BMC Struct Biol*, 2009, **9**, 51.
9. P. V. Hornbeck, J. M. Kornhauser, S. Tkachev, B. Zhang, E. Skrzypek, B. Murray, V. Latham and M. Sullivan, *Nucleic Acids Res*, 2012, **40**, D261-270.
