# Supplementary material for: A charge-suppressing strategy for probing protein methylation
Source: Royal Society of Chemistry journal article supplement (doi:10.1039/c6cc00814c), 2016-01-01
Supplement: c6cc00814c3.xlsx [file c6cc00814c3.xlsx]

## Sheet: Table S1
id	has R?	MDA modified?	Modified Sequence	Charges	Mass	PEP	Score
0		Yes	AAAAAAAIQAK	2	955.545	0.024105	88.495
1		Yes	AAEAAAAPAESAAPAAGEEPSKEEGEPK	3	2635.22	6.8319e-18	143.15
2		Yes	AAEDDEDDDVDTK	2	1436.54	1.234e-08	184.03
3		Yes	AAEDDEDDDVDTKK	2	1564.64	4.7632e-23	222.25
4	+	+	AAEEEDEADPKR	3	1358.6	0.040447	66.19
5		Yes	AAFDDAIAEIDTISEESYK	2	2086.96	0.0022014	82.259
6		Yes	AAIQEIISK	2	971.565	0.04345	113.62
7		Yes	AAQEEYVK	2	936.455	0.01041	127.02
8	+	+	AAQEEYVKR	2	1092.56	0.07444	70.908
9	+	+	AAVPSGASTGIYEAIEIR	2	1803.94	2.6783e-10	180.62
10	+	+	ACANPAAGSVIIIENIR	2	1767.93	3.787e-06	161.84
11		Yes	ACFHCETCK	2	1211.45	0.030411	122.13
12	+	+	ACGIVASNINIKPGECIR	2,3	1971	3.5388e-07	160.8
13	+	+	ACQSIYPIHDVFVR	2	1703.85	0.061102	67.019
14	+	+	ADAETIRK	2	902.482	0.02932	96.492
15	+	+	ADDGRPFPQVIK	2	1341.7	0.086647	107.09
16	+	+	ADEGISFR	2	893.424	0.024397	120.46
17		Yes	ADFCIIHYAGK	2	1293.62	0.022363	90.827
18		Yes	ADIDVSGPK	2	900.455	0.029816	122.52
19		Yes	ADKPDMGEIASFDK	2	1522.7	8.868e-12	201.48
20		Yes	ADVVVSGPK	2	870.481	0.057382	80.438
21		Yes	AEEIIEK	2	830.439	0.069637	110.61
22		Yes	AEGAATEEEGTPK	2	1288.58	0.0071165	115.33
23		Yes	AEGPEVDVNIPK	2	1266.65	0.025865	110.39
24	+	+	AEISEGQVR	2	987.499	0.002977	147.19
25		Yes	AEPPKAPEQEQAAPGPAAGGEAPK	3	2297.13	3.6442e-12	142.97
26		Yes	AFAVGVQQVIIK	2	1271.76	0.015554	85.355
27	+	+	AFGPGIQGGSAGSPAR	2	1428.71	1.1234e-08	180.48
28	+	+	AFGYYGPIR	2	1042.52	0.087722	86.794
29	+	+	AGAICISR	2	846.438	0.028139	117.16
30		Yes	AGEVFIHK	2	899.486	0.010649	126.67
31	+	+	AGGPGIER	2	755.393	0.014722	129.4
32	+	+	AGITTIEAVKR	2	1157.68	0.0090254	104.05
33	+	+	AGMTHIVR	2	883.47	0.0042691	124.08
34	+	+	AGNIGGGVVTIER	2	1241.67	0.034874	74.46
35	+	+	AGQSAAGAAPGGGVDTR	2	1441.69	0.0017585	108.63
36	+	+	AGTGVDNVDIEAATR	2	1487.72	0.0037278	79.875
37	+	+	AGVIAGHDNR	2	1008.51	0.023703	124.23
38		Yes	AHAFAVQQK	2	998.53	0.052447	89.296
39		Yes	AHIAQICEK	2	1068.54	0.038217	117.04
40		Yes	AHSSMVGVNIPQK	2	1366.7	0.063464	63.091
41		Yes	AHVVPCFDASK	2	1229.59	0.051592	74.162
42		Yes	AIAAAGYDVEK	2	1106.56	0.017797	98.249
43		Yes	AIAAGGYDVEK	2	1092.55	0.055744	73.067
44	+	+	AIAAPAAEEKEEAR	2	1454.74	8.4213e-05	167.44
45		Yes	AIANSIACQGK	2	1131.57	0.0035392	135.86
46		Yes	AIDVMVSTFHK	2,3	1246.64	0.028401	82.749
47		Yes	AIEEANTEIEVK	2	1344.68	0.012468	95.477
48	+	+	AIESPERPFIAIIGGAK	2	1767.99	5.2109e-06	166.9
49		Yes	AIGQNPTNAEVIK	2	1353.73	0.019253	136.53
50	+	+	AIIAAQYSGAQVR	2	1346.73	0.062703	128.67
51		Yes	AITIAGIPQSIIECVK	2	1711.95	0.00033595	148.72
52		Yes	AITIAGVPQSVTECVK	2	1671.89	0.010214	77.42
53		Yes	AITQTGGPHVK	2	1107.6	0.087005	64.82
54		Yes	AITVPEITQQVFDAK	2	1658.89	0.019165	131.35
55	+	+	AIVAIENPADVSVISSR	2	1739.94	3.7818e-07	173.03
56		Yes	AIVATPGKK	2	883.549	0.034845	75.38
57		Yes	AKDPFAHIPK	3	1122.62	0.034785	123.63
58		Yes	AKFENICK	2	1008.51	0.024174	127.02
59	+	+	AKQEEIEAAIQR	2	1384.73	0.065104	132.32
60	+	+	AMMMPMHSSIGDRVR	2	1717.79	0.061414	17.744
61		Yes	AMQDAEVSK	2	977.449	0.050284	93.178
62		Yes	ANIPQSFQVDTSK	2	1433.72	0.027311	72.34
63	+	+	APAMFNIR	2	918.475	0.027261	117.93
64	+	+	APGFGDNRK	2	960.478	0.035958	89.698
65	+	+	APIIAVTR	2	839.523	0.0018549	145.04
66	+	+	APIRPDIVNFVHTNIR	3	1861.03	0.032711	77.42
67	+	+	APVPASEIIASGVISR	2	1565.88	0.0051614	113.25
68	+	+	APVPTGEVYFADSFDR	2	1769.83	0.0016843	105.19
69		Yes	AQAAAPASVPAQAPK	2	1376.74	0.0025711	96.464
70	+	+	AQCPIVER	2	971.486	0.038032	109.86
71		Yes	AQHEDQVEQYKK	3,4	1501.72	0.00080643	145.09
72	+	+	AQIFANTVDNAR	2	1318.66	0.026949	82.171
73	+	+	AQYEDIANR	2	1078.5	0.082235	92.838
74	+	+	ARFEEINADIFR	2	1479.75	0.046849	88.338
75		Yes	ASCIYGQIPK	2	1135.57	0.022394	113.22
76	+	+	ASDVHEVR	2	911.446	0.025721	119.29
77		Yes	ASGPPVSEIITK	2	1197.66	0.06086	65.5
78	+	+	ASGVQVADEVCR	2	1289.6	0.020239	88.187
79	+	+	ASIEAAIADAEQR	2	1343.67	0.026407	76.326
80	+	+	ASIEGNIAETENR	2	1402.67	0.011697	114.24
81	+	+	ASIENSIR	2	888.466	0.035348	111.01
82		Yes	ATAVVDGAFK	2	977.518	0.026163	101.65
83		Yes	ATCAPQHGAPGPGPADASK	3	1788.82	0.060186	68.173
84	+	+	ATHGQTCAR	2	1000.45	0.054787	116.05
85		Yes	ATNFIAHEK	2	1029.52	4.2574e-05	159.79
86		Yes	ATVTPSPVK	2	898.512	0.05584	83.206
87		Yes	AVEIAANTK	2	915.503	0.047416	109.11
88	+	+	AVFVDIEPTVIDEIR	2	1714.91	0.038375	128.31
89	+	+	AVFVDIEPTVIDEVR	2	1700.9	0.002245	150.69
90		Yes	AVIFCISEDKK	2	1308.67	0.00013928	150.35
91	+	+	AVIVDIEPGTMDSVR	2	1600.81	0.011041	100.22
92	+	+	AVTEQGAEISNEER	2	1531.71	2.6662e-46	276.41
93	+	+	AVVGVVAGGGR	2	940.545	0.00024773	154.84
94	+	+	AYAQGISR	2	864.445	0.019429	124.83
95		Yes	AYGGSMCAK	2	943.389	0.055807	83.265
96		Yes	AYGQAIAK	2	820.444	0.018926	114.78
97		Yes	AYSEAHEISK	2	1133.54	6.6571e-05	157.96
98	+	+	CDVDIRK	2	904.444	0.038462	117.93
99		Yes	DATNVGDEGGFAPNIIENK	2	1959.92	3.3807e-24	224.55
100		Yes	DAVTYTEHAK	2	1133.54	0.024821	107.15
101		Yes	DDDIAAIVVDNGSGMCK	2	1778.78	1.2608e-05	158.17
102		Yes	DFIAGGVAAAISK	2	1218.66	0.0099283	113.77
103		Yes	DIADEIAIVDVIEDK	2	1656.85	0.038289	67.964
104	+	+	DITSDTSGDFR	2	1212.53	0.085766	73.885
105	+	+	DIYDAGVKR	2	1035.53	0.039067	81.594
106	+	+	DNIQGITKPAIR	2,3	1324.75	1.7225e-08	185.25
107		Yes	DSCPIDCK	2	993.39	0.036885	100.45
108		Yes	DSDISHVQNK	2	1141.54	1.3651e-12	196.88
109	+	+	DSHGVAQVR	2	967.484	0.077735	106.6
110	+	+	DSIIQDGEFSMDIR	2	1624.74	3.8857e-08	182.89
111	+	+	DSNNICIHFNPR	2,3	1485.68	2.0734e-05	164.81
112	+	+	DSYVGDEAQSKR	2,3	1353.62	2.0651e-09	186.87
113	+	+	DTGIGISPTASIR	2	1286.68	0.079851	64.55
114		Yes	DVNAAIATIK	2	1014.57	0.012783	126.71
115		Yes	EAGAGGIAIAVEGPSK	2	1425.75	0.015961	75.764
116		Yes	EAPAPPKAEAK	2	1107.59	0.060382	85.958
117	+	+	EEAENTIQSFR	2	1322.61	0.038451	89.171
118		Yes	EEEIAAIVIDNGSGMCK	2	1834.84	3.6402e-39	268.56
119		Yes	EGVHGGIINK	2	1022.55	0.024377	108.98
120		Yes	EHAIIAYTIGVK	2	1313.73	0.026588	76.655
122		Yes	EIEVQHPAAK	2	1120.59	0.021484	114.5
123		Yes	EIISNASDAIDK	2	1274.64	7.0843e-05	115.57
124	+	+	EISDIAHR	2	939.477	0.066316	97.798
125		Yes	EITAIAPSTMK	2	1160.61	0.039397	77.379
126		Yes	EIVHIQAGQCGNQIGAK	3	1821.92	0.0021017	81.632
127	+	+	EMEEATASAQRIRR	3	1646.82	0.052717	29.071
128		Yes	EQIAAIKK	2	899.544	0.04018	83.206
129	+	Yes	EQTRIIK	2	886.524	0.053965	73.039
130	+	+	EQVANSAFVER	2	1248.61	0.044918	83.862
131		Yes	ESEPQAAAEPAEAK	2	1426.66	4.4333e-05	160.69
132	+	+	ESTIHIVIR	2	1066.61	0.077487	107.9
133		Yes	ETGEHIVHVK	2	1147.6	0.0079032	133.57
134	+	+	ETIEQEKR	2	1031.52	0.030273	95.531
135		Yes	ETPAATEAPSSTPK	2	1385.67	0.0032145	113.77
136		Yes	ETVSEESNVICISK	2	1593.76	0.0030168	82.069
137		Yes	EVATNSEIVQSGK	2	1360.68	2.0175e-08	180.24
138	+	+	EVIHGNQR	2	951.489	0.051287	104.21
139	+	+	FAAATGATPIAGR	2	1202.64	0.026444	99.752
140		Yes	FAANPNQNK	2	1002.49	0.050175	93.374
141	+	+	FADISEAANR	2	1092.52	0.032904	116.3
142		Yes	FDASFFGVHPK	2	1250.61	0.013739	108.43
143		Yes	FEDENFIIK	2	1153.57	0.047994	104.2
144	+	+	FGQGGAGPVGGQGPR	2	1340.66	0.062383	67.964
145		Yes	FHVEEEGK	2	973.451	8.7646e-06	165.11
146		Yes	FHVEEEGKGK	2	1158.57	0.063063	97.565
147		Yes	FIEQQNK	2	905.461	0.043457	125.25
148		Yes	FIIPNASQAESK	2	1303.68	0.0471	69.979
149		Yes	FKDPNAPK	2	915.481	0.019809	130.27
150	+	+	FPGQINADIR	2	1129.59	0.042461	102.06
151		Yes	FQTMEEK	2	911.406	0.05616	66.682
152	+	+	FSGKEQRTHR	2	1244.64	0.019229	82.645
153		Yes	FTASAGIQVVGDDITVTNPK	2	2032.05	0.02774	75.548
154		Yes	FVIKPIDK	2	958.585	0.085655	100.45
155		Yes	FYGDEEKDK	2	1129.49	0.069239	122.52
156		Yes	GAGTGGIGIAVEGPSEAK	2	1569.8	0.013423	76.85
157		Yes	GCEVVVSGK	2	933.459	0.048295	101.64
158	+	+	GDGPICIVIAPTR	2	1367.72	0.011275	81.625
159		Yes	GDIGIEIPAEK	2	1140.6	0.026453	85.355
160	+	+	GEGERPAQNEK	2	1213.57	0.065346	99.568
161	+	+	GFAFVQYVNER	2	1328.65	0.024052	105.86
162		Yes	GGEIQPVSVK	2	1012.56	0.00322	140.16
163	+	+	GGGGNFGPGPGSNFR	2	1376.62	0.015975	137.84
164	+	+	GGNFGFGDSR	2	1012.44	0.041138	105.4
165		Yes	GHIENNPAIEK	2	1220.61	0.028766	82.261
166		Yes	GIGDCIVK	2	860.443	0.086494	85.265
167	+	+	GIGTDEDSIIEIICSR	2	1776.86	1.7365e-08	175.28
168		Yes	GIIAADESTGSIAK	2	1331.69	0.0032591	92.925
169	+	+	GIQTSQDAR	2	974.478	0.024417	133.13
170		Yes	GITGVEDK	2	817.418	0.059977	91.626
171		Yes	GITSVINQK	2	958.545	0.048295	101.64
172		Yes	GIVDQSQQAYQEAFEISK	2	2039.98	8.7938e-67	306.53
173		Yes	GKGGEIQPVSVK	2	1197.67	0.045554	105.2
174	+	+	GPAYGISR	2	819.424	0.043736	107.43
175	+	+	GPIQSVQVFGR	2	1186.65	0.037381	90.05
176		Yes	GPSSVEDIK	2	930.466	0.052641	88.948
177		Yes	GPTQEFK	2	805.397	0.062211	114.19
178		Yes	GSGTAEVEIKK	2	1117.6	0.0020303	132.88
179	+	+	GTNESIER	2	904.425	0.069379	96.492
180	+	+	GVDEVTIVNIITNR	2	1541.84	0.0079824	99.531
181		Yes	GVVQEIQQAISK	2	1298.72	0.061847	65.179
182	+	+	GYSFTTTAER	2	1131.52	0.0012878	149.72
183		Yes	HIIPAANTGESK	2	1236.65	0.072745	63.408
184		Yes	HITGEFEK	2	959.471	0.019549	113.89
185		Yes	HIVDEPQNIIK	2	1304.71	0.039397	77.379
186		Yes	HQGVMVGMGQK	2	1170.56	0.021083	92.538
187		Yes	HQPTAIIAK	2	977.566	0.04764	107.21
188		Yes	HSQFIGYPITIYIEK	2	1807.95	0.001951	85.909
189	+	+	HTNYTMEHIR	3	1300.6	0.00081171	153.05
190	+	+	IADFGVIHR	2	1026.56	0.078318	103.56
191	+	+	IAEQAER	2	815.414	0.051837	130.77
192	+	+	IAGPGIGSGVR	2	982.556	0.056307	78.655
193	+	+	IAMQEFMIIPVGAANFR	2	1906.98	0.0038005	127.3
194	+	+	IATQSNEITIPVTFESR	2	1904.98	0.00014994	95.428
195		Yes	IAVAAQNCYK	2	1136.56	0.011083	129.1
196	+	+	IAVHCTVR	2	954.507	0.050727	104.45
197		Yes	IAYIAHPK	2	911.523	0.022265	110.61
198		Yes	ICVIHEK	2	897.474	0.061611	114.54
199	+	+	IDTIEIITDR	2	1187.64	0.07423	79.148
200	+	Yes	IEARREK	2	900.514	0.063562	58.815
201		Yes	IEDISQQAQIAAAEK	2	1613.83	0.040938	67.102
202	+	+	IEPPEQR	2	867.445	0.055316	71.949
203		Yes	IFAPNHVVAK	2	1094.62	0.026612	99.802
204	+	+	IFDQAFGIPR	2	1162.61	0.064978	82.749
205	+	+	IFGVTTIDIVR	2	1232.71	0.056307	78.655
206	+	+	IGDIYEEEMR	2	1253.56	0.060614	85.533
207	+	+	IGDVYVNDAFGTAHR	3	1633.78	0.0047833	79.466
208	+	+	IGEYGFQNAIIVR	2	1478.79	2.2214e-06	173.72
209		Yes	IGHPAPNFK	2	979.524	0.053841	86.794
210		Yes	IGIEIIK	2	784.506	0.067138	111.28
211	+	+	IGIEIIKR	2	940.607	0.059708	85.212
212	+	+	IGIHEDSTNR	2,3	1140.55	0.027466	120.99
213		Yes	IGPIGISPK	2	880.538	0.04774	106.36
214		Yes	IGQEATVGK	2	901.487	0.050144	93.429
215		Yes	IGQGYIIK	2	890.523	0.058836	91.9
216		Yes	IHAGPITK	2	835.492	0.016732	117.93
217	+	+	IHFFMPGFAPITSR	2	1619.83	0.064393	119.45
218	+	+	IIACIASR	2	902.501	0.054792	102.71
219		Yes	IIADPTGAFGK	2	1088.59	0.024105	88.495
221	+	+	IIAPPERK	2,3	922.56	0.013118	114.6
222		Yes	IIAPVAEEEATVPNNK	2	1693.89	6.3401e-13	202.13
223	+	+	IICGIIAER	2	1043.58	0.079787	95.909
224		Yes	IIEGEDAHITQYK	2	1515.76	1.8767e-12	198.81
225	+	+	IIEGEEER	2	973.472	0.0338	112.17
226		Yes	IIHEQEQQSSS	2	1284.59	0.022943	90.05
227		Yes	IIIAEIEQIK	2	1168.71	0.042305	80.231
228		Yes	IIIIGDSGVGK	2	1070.63	0.038323	77.662
229		Yes	IIIQVQHASK	2	1135.67	0.0257	103.55
230		Yes	IIMVGIDAAGK	2	1086.61	0.025112	87.149
231		Yes	IINEPTAAAIAYGIDK	2	1658.89	0.031297	71.344
232	+	+	IINEPTAAAIAYGIDR	2	1686.89	0.00063547	147.12
233	+	+	IIPGFMCQGGDFTR	2	1597.74	0.045342	70.563
234	+	+	IIQKTR	2	757.481	0.067231	61.997
235	+	+	IIRKAIE	2	841.539	0.061154	59.641
236		Yes	IISNASCTTNCIAPIAK	2	1832.91	1.3197e-30	250.17
237		Yes	IITEDVQGK	2	1001.54	0.022071	127.68
238		Yes	IIYGGSVTGATCK	2	1325.66	2.8769e-17	214.26
239	+	+	IKAEQARR	2	970.567	0.085882	64.836
240		Yes	IKDDEVAQIKK	3	1285.72	0.0070934	88.596
241		Yes	IKECCDKPIIEK	3	1531.77	0.01727	66.267
242		Yes	IKGDDIQAIKK	3	1227.72	0.016919	72.652
243		Yes	IMIEMDGTENK	2	1279.58	0.087347	64.73
244		Yes	IMNTFSVVPSPK	2	1318.7	0.015071	86.911
245	+	+	INFAVASR	2	876.482	0.0528	103.56
246		Yes	INVTEQEK	2	959.492	0.0066158	133.58
247		Yes	IPDGYEFK	2	967.465	0.018926	114.78
248		Yes	IPIQDVYK	2	974.544	0.0097862	128.1
249		Yes	IQAEIDNIK	2	1042.57	0.057493	80.239
250		Yes	IQAEIEGIK	2	999.56	0.05337	87.639
251	+	+	IQDAEIAR	2	914.482	0.019261	124.98
252	+	+	IREEYPDR	2	1076.53	0.068744	111.17
253	+	+	ISEIEAAIQR	2	1128.61	0.05597	88.495
254	+	+	ISEQFTAMFR	2	1228.59	0.066197	81.972
255	+	+	ISGGIGAGSCR	2	1033.5	0.018554	114.89
256		Yes	ISIEGDHSTPPSAYGSVK	3	1843.9	0.051304	67.136
257		Yes	ISIGIPVGAVINCADNTGAK	2	1969.03	1.9332e-10	169.61
258		Yes	ISNIFVIGK	2	989.591	0.048071	103.55
259	+	+	ISQIEMAR	2	946.491	0.043396	107.57
260		Yes	ISSDIDGHPVPK	2	1263.65	0.003055	99.283
261		Yes	ISVDYGKK	2	908.497	0.0072286	117.4
262		Yes	ISYNTASNK	2	996.488	0.048555	99.442
263	+	+	ITDCVVMR	2	992.478	0.023079	121.62
264	+	+	ITGVFAPR	2	859.492	0.064616	98.523
265		Yes	ITIDNAYMEK	2	1196.57	0.016258	121.83
266	+	+	ITIQNR	2	743.429	0.042887	74.849
267		Yes	IVADKDYSVTANSK	3	1509.77	0.0080311	79.492
268	+	+	IVIIANNCPAIR	2	1352.76	0.037867	77.744
269	+	+	IVIITAGAR	2	912.576	0.002977	147.19
270	+	+	IVINGNPITIFQER	2	1612.89	6.4815e-08	100.04
271	+	+	IVIQIDNAR	2	1040.6	0.07931	98.392
272		Yes	IVQAFQFTDK	2	1195.62	0.0012255	144.77
273		Yes	IYVDDGIISIQVK	2	1461.81	0.050206	64.121
274		Yes	KADIDITK	2	902.507	0.046978	79.474
275		Yes	KAIAAAGYDVEK	2	1234.66	0.0059287	116.03
276		Yes	KASGPPVSEIITK	2,3	1325.76	1.3691e-06	172.99
277		Yes	KAYGQAIAK	2	948.539	0.0059335	133.86
278	+	+	KFIPIFDR	2	1034.59	0.061757	84.498
279	+	+	KGDIFIVR	2	946.56	0.08189	78.334
280	+	+	KIEAAEER	2	944.493	0.068126	82.279
281	+	+	KIHDIIGPHMIR	3	1428.8	0.086428	68.355
282		Yes	KINVTEQEKIDK	3	1443.79	3.6921e-09	176.95
283		Yes	KISSDIDGHPVPK	3	1391.74	0.00303	94.767
284		Yes	KITIADCGQIE	2	1246.62	0.00026222	143
285	+	+	KITPQGQR	2	926.53	0.013272	114.28
286	+	+	KPATSYVR	2	920.508	0.055167	86.794
287		Yes	KPYCNAHYPK	3	1276.6	0.000542	144.12
288		Yes	KQSIGEIIGTINAAK	2	1541.88	0.016076	68.044
289		Yes	KQTAIVEIIK	2	1141.71	0.010334	108.67
290		Yes	KSCCSCCPVGCAK	2	1572.6	0.002923	136.93
291		Yes	KSIIVQTK	2	915.575	0.053293	77.282
292		Yes	KTEAPAAPAAQETK	2	1411.73	4.0688e-47	279.77
293		Yes	KTETQEKNPIPSK	3	1498.8	0.0020427	90.614
294	+	+	KTSYAQHQQVR	3	1344.69	0.033751	74.841
295		Yes	KVAPAPAVVK	2	978.623	0.013464	91.087
296		Yes	KVESIQEEIAFIK	2	1532.85	0.074386	73.466
297	+	+	KVPQVSTPTIVEVSR	2	1638.93	0.004937	139.66
298	+	+	KVTGTIDANR	2	1073.58	0.023531	88.681
299		Yes	KVVGCSCVVVK	2	1233.66	0.010971	86.014
300	+	+	KYEEVAR	2	893.461	1.725e-07	143
301		Yes	MAVTFIGNSTAIQEIFK	2	1868.97	0.064121	63.681
302	+	+	MDDREDIVYQAK	2	1481.68	7.0144e-13	203.61
303		Yes	MDKNEIVQK	2	1103.56	1.0668e-07	175.51
304	+	+	MEGRNCTVEIIPER	3	1702.81	0.054486	19.678
305	+	+	MEPGGDHRSRSSGGR	3	1584.72	0.081166	14.228
306	+	+	MFGGPGTASR	2	979.455	0.04406	98.033
307	+	+	MGGKPR	2	644.343	0.051975	67.763
308	+	+	MQRSIMAAIK	3	1147.62	0.066058	24.089
309	+	+	MQSFRER	2	952.455	0.054539	69.383
310	+	+	MSRGCSSDIR	2	1167.51	0.067688	28.958
311	+	+	MSVQPTVSIGGFEITPPVVIR	2	2226.21	3.4959e-08	135.29
312		Yes	MVVESAYEVIK	2	1266.65	0.055744	73.067
313		Yes	NAGVEGSIIVEK	2	1214.65	0.061847	65.179
314		Yes	NIIHGSDSVK	2	1068.56	0.085941	71.349
315		Yes	NISFNDKK	2	964.498	0.01274	105.14
316	+	+	NNQITNNQR	2	1100.53	0.042418	124.98
317	+	+	NQIAGVKQQIYHPAIPTIRHMDR	3	2685.43	0.088201	25.207
318		Yes	NQTAEKEEFEHQQK	3	1744.8	0.06025	134.13
319		Yes	NQVAMNPTNTVFDAK	2	1648.79	0.016126	108.58
320	+	+	PASGPIRPIVR	3	1161.7	0.069804	91.584
321	+	+	PGGIGSSSIYGIGASRPR	3	1730.91	0.0073161	80.534
322	+	+	PGPRRIR	2	850.525	0.073403	55.441
323	+	+	PMFIVNTNVPR	2	1286.68	0.0012291	142.43
324	+	+	PSPINIR	2	795.46	0.076548	58.577
325	+	+	PVYITRMQMHSIR	2	1630.84	0.046599	23.711
326	+	+	QDIAFAYQR	2	1110.55	0.054477	120.15
327	+	+	QEYDESGPSIVHR	2	1515.7	0.01582	96.64
328	+	+	RCMRHAMCCPGNYCK	4	1999.79	0.086107	5.2115
329	+	+	RDHAIIEEQSK	3	1324.67	0.058131	65.5
330	+	+	RFDDAVVQSDMK	2	1409.66	0.0005978	152.47
331	+	+	RGDIPFVVPR	2	1154.66	0.053988	70.056
332	+	+	RPDQQIQGEGK	2	1254.63	0.0041796	129.89
333	+	+	RPPSAFFIFCSEYRPK	3	2000.99	0.0234	63.894
334	+	+	RTDEAAFQK	2	1064.53	0.035785	90.15
335	+	+	RVHPVSTMIK	3	1166.66	0.020551	93.178
336		Yes	SAAQAAAQTNSNAAGK	2	1459.7	3.7215e-30	248.68
337	+	+	SACGVCPGR	2	962.406	0.077569	107.47
338		Yes	SAISGHIETVIIGIIK	2	1649.97	2.6858e-12	190.37
339		Yes	SAVEDEGIK	2	946.461	0.048848	96.948
340		Yes	SAVTTVVNPK	2	1014.57	0.042552	79.974
341	+	+	SAYGGPVGAGIR	2	1103.57	0.068849	71.555
342		Yes	SCCSCCPVGCAK	2	1444.5	1.2514e-17	212.82
343		Yes	SCNCIIIK	2	1006.49	0.0064536	133.86
344		Yes	SDAAVDTSSEITTK	2	1423.67	3.3211e-05	168.02
345		Yes	SDGAPASDSKPGSSEAAPSSK	3	1931.87	2.8584e-05	104.21
346		Yes	SDKPDMAEIEK	2	1261.59	0.0087326	138.76
347	+	+	SESPKEPEQIR	2	1298.65	0.007657	139.43
348	+	+	SESPKEPEQIRK	3	1426.74	0.0063022	93.258
349		Yes	SGAIDVIQMKEEDVIK	2	1773.92	6.052e-23	234.22
350	+	+	SGAQASSTPISPTR	2	1358.68	0.05076	69.345
351		Yes	SGVSIAAIK	2	844.502	0.00057169	155.07
352		Yes	SGVSIAAIKK	2	972.597	0.014518	88.495
353		Yes	SGYIAGDK	2	809.392	0.079958	86.833
354	+	+	SIYASSPGGVYATR	2	1427.7	2.8057e-05	168.98
355		Yes	SIYGEKFEDENFIIK	2	1830.9	2.7194e-08	184.76
356		Yes	SKEYFSK	2	887.439	0.0070555	147.52
357	+	+	SNVSDAVAQSTR	2	1233.59	0.038604	117.2
358		Yes	SPAGIQVINDYIADK	2	1602.83	0.001655	148.72
359		Yes	SPASDTYIVFGEAK	2	1483.72	9.1166e-23	225.13
360	+	+	SPYTVTVGQACNPSACR	2	1866.84	3.7765e-18	220.46
361	+	+	SQIHDIVIVGGSTR	2	1480.8	6.0209e-05	162.94
362	+	+	SQRTMIAVVDYMRR	3	1724.88	0.060819	23.092
363	+	+	SSFSQHAR	2	918.431	0.070744	95.909
364		Yes	STGEAFVQFASQEIAEK	2	1840.88	1.2307e-06	167.69
365		Yes	STGGAPTFNVTVTK	2	1378.71	0.0023954	150.49
366		Yes	STITDSIVCK	2	1122.56	0.026648	99.653
367		Yes	STTTGHIIYK	2	1119.59	0.033791	89.08
368		Yes	STVHEIICK	2	1085.55	0.0010817	154.49
369	+	+	SVTEQGAEISNEER	2	1547.71	8.1675e-38	266.78
370		Yes	SYCAEIAHNVSSK	2	1464.67	4.4326e-24	236.11
371	+	+	SYEIPDGQVITIGNER	2	1789.88	2.0413e-37	261.67
372		Yes	TAFQEAIDAAGDK	2	1335.63	1.0465e-05	170.18
373	+	+	TAIIHDGIAR	2	1065.59	0.076035	78.934
374		Yes	TATPQQAQEVHEK	2,3	1465.72	1.3634e-06	173.72
375		Yes	TATQIAVNK	2	944.529	0.014986	133.13
376		Yes	TCVADESHAGCEK	2,3	1462.58	7.3135e-09	186.46
377		Yes	TDEAAFQK	2	908.424	7.8643e-06	166.05
378	+	+	TDEGIAYR	2	923.435	0.011735	132.57
379	+	+	TDIEKDIISDTSGDFRK	3	1938.95	6.9575e-05	95.067
380	+	+	TDYNASVSVPDSSGPER	2	1779.79	4.58e-09	181.51
381	+	+	TFIAIKPDGVQR	2	1343.76	4.1644e-12	194.96
382		Yes	TFVNITPAEVGVIVGK	2	1642.93	6.196e-06	159.22
383	+	+	TGAIVDVPVGEEIIGR	2	1623.88	0.082303	65.805
384		Yes	TGISDVFAK	2	936.492	0.065492	78.334
385	+	+	TGSQGQCTQVR	2	1220.56	1.5186e-08	174.98
386		Yes	TIAECIADEIINAAK	2	1630.82	0.0019857	147.18
387		Yes	TIAQDYGVIK	2	1106.6	0.027039	98.048
388	+	+	TIEGEIHDIR	2	1181.6	0.042626	101.65
389	+	+	TIMNIGGIAVAR	2	1214.68	0.038486	127.87
390		Yes	TIQEMQQK	2	1004.5	0.037264	100.19
391		Yes	TKDGVVEITGK	2	1145.63	0.0703	80.245
392	+	+	TKFETEQAIR	2	1221.64	0.039494	130.01
393	+	+	TNQEIQEINR	2	1243.62	2.3769e-12	196.27
394	+	+	TPAIIAIR	2	853.539	0.0006741	153.71
395	+	+	TPAQFDADEIR	2	1261.59	0.00060912	149.23
396		Yes	TPAQYDASEIK	2	1221.59	0.014287	107.06
397		Yes	TPCEEIIVK	2	1087.56	0.029816	122.52
398		Yes	TPDVIKK	2	799.48	0.020139	122.78
399	+	+	TPGPGAQSAIR	2	1053.56	0.026963	101.38
400	+	+	TPIVGQPSIPGGPVR	2	1473.83	1.0026e-16	212.95
401	+	+	TPVEPEVAIHR	3	1246.67	0.019951	112.36
402	+	+	TQIAVCQQR	2	1102.56	0.070793	113.62
403	+	+	TRIEQEIATYR	2	1378.72	1.1675e-12	198.81
404	+	+	TTGIVMDSGDGVTHTVPIYEGYAIPHAIIR	3,4	3182.61	3.5177e-24	166.35
405	+	+	TTPSYVAFTDTER	2	1486.69	0.066135	113.61
406		Yes	TVGVEPAADGK	2	1042.53	0.055744	73.067
407	+	+	TVKEEAEKPER	3	1314.68	0.0085986	98.044
408		Yes	TVMENFVAFVDK	2	1398.69	0.017308	79.693
409	+	+	TVTNAVVTVPAYFNDSQR	2	1980.99	0.01886	77.324
410	+	+	TYSIGSAIRPSTSR	2	1494.78	0.0097657	83.53
411	+	+	UTRTNMIIEIAR	2	1485.69	0.049718	19.277
412		Yes	VAEDEAEAAAAAK	2	1244.59	0.016208	76.326
413		Yes	VAEIEHAEKEK	2	1281.66	0.026446	114.89
414		Yes	VAGAQIQGAK	2	941.529	1.3517e-05	128.36
415		Yes	VAPEEHPVIITEAPINPK	2	1953.06	3.2547e-14	201.3
416		Yes	VAVVAGYGDVGK	2	1133.61	0.048044	69.672
417		Yes	VCENIPIVICGNK	2	1514.76	3.6153e-05	160.18
418		Yes	VCNPIITK	2	943.516	0.058836	91.9
419	+	+	VCTIAIIDPGDSDIIR	2	1756.9	6.2939e-06	164.88
420	+	+	VEIIANDQGNR	2	1227.62	1.1437e-12	192.38
421		Yes	VETGVIKPGMVVTFAPVNVTTEVK	3	2514.38	0.085394	63.184
422	+	+	VGDVYIPR	2	917.497	0.010811	133.55
423		Yes	VGEFSGANK	2	907.44	0.047416	109.11
424		Yes	VGGTSDVEVNEK	2	1232.59	0.0045773	141.1
425		Yes	VGINYQPPTVVPGGDIAK	2	1823.98	3.2867e-05	121.27
426		Yes	VGIQVVAVK	2	911.58	0.011484	135.83
427	+	+	VGPDTER	2	772.372	0.055463	71.029
428	+	+	VGVNGFGR	2	804.424	0.043999	107.32
429		Yes	VHIVGIDIFTGK	2	1297.74	0.015921	84.17
430		Yes	VIATVTKPVGGDK	2	1283.74	0.037691	134.13
431		Yes	VIHDNFGIVEGIMTTVHAITATQK	3	2594.35	0.0019528	79.635
432	+	+	VIIAAHGNSIR	2	1149.66	0.00054237	150.27
434		Yes	VIIPEYGGTK	2	1075.59	0.048833	78.516
435		Yes	VINVPICK	2	941.537	0.062317	91.065
436		Yes	VNHVTISQPK	2	1121.62	0.053176	77.677
437		Yes	VNIGQGSHPQK	2,3	1163.6	0.03038	80.102
438		Yes	VNQIGSVTESIQACK	2	1632.81	2.5178e-24	236.92
439		Yes	VPAINVNDSVTK	2	1255.68	0.050077	69.01
440	+	+	VPAIYGVDTR	2	1089.58	0.086638	77.677
441	+	+	VPTANVSVVDITCR	2	1529.79	6.6985e-17	216.68
442	+	+	VPVDVAYR	2	917.497	0.035817	110.81
443		Yes	VPVHDVTDASK	2,3	1166.59	0.00031939	150.61
444		Yes	VQAQGPGIK	2	896.508	0.056764	81.548
445		Yes	VQVEYKGETK	2	1179.61	0.031716	125.48
446		Yes	VSFEIFADK	2	1054.53	0.053555	87.308
447		Yes	VSFEIFADKVPK	2	1378.75	0.037781	112.15
448		Yes	VSSAEGAAKEEPK	2	1301.65	0.016139	108.56
449	+	+	VTDAINATR	2	959.504	0.077138	109.71
450	+	+	VTFRGR	2	734.419	0.070225	61.325
451		Yes	VTIAQGGVIPNIQAVIIPK	2	1930.16	1.0908e-05	135.27
452		Yes	VTVIFAGQHIAK	2,3	1282.74	0.0076062	138.99
453		Yes	VVDIMAHMASKE	2	1329.64	0.0055379	93.258
454		Yes	VVFVFGPDKK	2	1134.64	0.04651	66.692
455		Yes	YAITGDEVKK	2	1122.59	0.021441	78.149
456		Yes	YAIYDATYETK	2	1336.62	0.0084386	123.63
457		Yes	YEEIVK	2	779.407	0.03023	88.627
458		Yes	YGGQPVPNFPSK	2	1289.64	0.073968	63.32
459		Yes	YHNVGISK	2	916.477	0.019549	113.89
460	+	+	YHTINGHNAEVR	3	1409.68	0.044938	76.332
461		Yes	YIAEVAAGDDKK	2,3	1278.65	1.9153e-06	170.89
462		Yes	YIAPSGPSGTIK	2	1189.63	0.016635	81.865
463		Yes	YISPDQIADIYK	2	1424.72	0.025585	120.77
464	+	+	YYVTIIDAPGHR	2,3	1403.72	1.5511e-08	180.07

## Sheet: Table S2-1
id	Modified Sequence	OPA-lys-large	OPA-nterm-large	Proteins	Charge	Mass	PEP	Score
0	_AQTQSLVYPFPGPIPN_	0	0	YAL02SD	2	1727.89	0.0031574	98.123
1	_AQTQSLVYPFPGPIPN_	0	0	YAL02SD	2	1727.89	0.0039185	96.269
2	_DLGEEHF_	0	0	YAL01SD	2	845.356	3.3307e-292	90.415
3	_DTHKSEIA_	0	0	YAL01SD	2	899.435	0.05239	90.195
4	_EPM(ox)IGVNQE_	0	0	YAL05SD	2	1031.46	0.0016134	114.96
5	_EPMIGVNQE_	0	0	YAL05SD	2	1015.46	0.00079817	118.49
6	_EPMIGVNQE_	0	0	YAL05SD	2	1015.46	0.00039403	120.24
7	_EPM(ox)IGVNQEL_	0	0	YAL05SD	2	1144.54	0.0033723	107.63
8	_EPM(ox)IGVNQEL_	0	0	YAL05SD	2	1144.54	0.0021399	112.83
9	_EPM(ox)IGVNQEL_	0	0	YAL05SD	2	1144.54	0.033801	87.879
10	_EPM(ox)IGVNQELA_	0	0	YAL05SD	2	1215.58	2.7412e-05	128.61
11	_EPM(ox)IGVNQELA_	0	0	YAL05SD	2	1215.58	0.005485	105.96
12	_EPM(ox)IGVNQELA_	0	0	YAL05SD	2	1215.58	0.0022458	115.37
13	_EPM(ox)IGVNQELA_	0	0	YAL05SD	2	1215.58	0.0022458	115.37
14	_EPM(ox)IGVNQELA_	0	0	YAL05SD	2	1215.58	0.033762	87.448
15	_EPM(ox)IGVNQELA_	0	0	YAL05SD	2	1215.58	0.0034501	111.86
16	_EPMIGVNQELA_	0	0	YAL05SD	2	1199.59	5.2162e-15	169.95
17	_EPMIGVNQELA_	0	0	YAL05SD	2	1199.59	1.0577e-08	142.2
18	_ESNFNTQATN_	0	0	YAL03SD	2	1124.47	0.012567	99.835
19	_FESNFNT_	0	0	YAL03SD	1	857.356	0.02748	103.94
20	_FESNFNTQ_	0	0	YAL03SD	2	985.414	0.030133	97.858
21	_FESNFNTQ_	0	0	YAL03SD	2	985.414	3.7077e-08	150.54
22	_FESNFNTQ_	0	0	YAL03SD	2	985.414	1.392e-07	140.01
23	_FESNFNTQ_	0	0	YAL03SD	1	985.414	0.0092375	122
24	_FESNFNTQ_	0	0	YAL03SD	1	985.414	0.0013066	137.95
25	_FESNFNTQ_	0	0	YAL03SD	2	985.414	1.7684e-12	155.18
26	_FESNFNTQA_	0	0	YAL03SD	2	1056.45	2.6829e-13	163.24
27	_FESNFNTQA_	0	0	YAL03SD	2	1056.45	1.6714e-08	146.23
28	_FESNFNTQAT_	0	0	YAL03SD	2	1157.5	2.0097e-09	147.52
29	_FESNFNTQAT_	0	0	YAL03SD	2	1157.5	6.3342e-22	184.55
30	_FESNFNTQAT_	0	0	YAL03SD	2	1157.5	6.0483e-40	216.54
31	_FESNFNTQAT_	0	0	YAL03SD	2	1157.5	3.4235e-21	174.03
32	_FESNFNTQAT_	0	0	YAL03SD	1	1157.5	0.0083376	116.13
33	_FESNFNTQAT_	0	0	YAL03SD	2	1157.5	4.1296e-21	171.31
34	_FESNFNTQATN_	0	0	YAL03SD	2	1271.54	5.8127e-30	195.98
35	_FESNFNTQATN_	0	0	YAL03SD	2	1271.54	2.8411e-14	166.7
36	_FESNFNTQATN_	0	0	YAL03SD	2	1271.54	1.1532e-06	49.43
37	_FESNFNTQATN_	0	0	YAL03SD	2	1271.54	3.8598e-63	63.321
38	_FESNFNTQATN_	0	0	YAL03SD	2	1271.54	5.8396e-12	51.213
39	_FESNFNTQATN_	0	0	YAL03SD	2	1271.54	2.7336e-65	248.71
40	_FESNFNTQATN_	0	0	YAL03SD	2	1271.54	6.3379e-40	209.57
41	_FFVAPFPEV_	0	0	YAL05SD	2	1051.54	3.4571e-05	123.8
42	_FFVAPFPEV_	0	0	YAL05SD	2	1051.54	0.0022901	112.03
43	_FFVAPFPEVFG_	0	0	YAL05SD	2	1255.63	6.6926e-06	130.97
44	_FFVAPFPEVFG_	0	0	YAL05SD	2	1255.63	4.4979e-05	110.37
45	_FFVAPFPEVFGKE_	0	0	YAL05SD	2	1512.77	5.3428e-06	133.56
46	_FFVAPFPEVFGKE_	0	0	YAL05SD	2	1512.77	1.6849e-05	123.87
47	_FKDLGEEH_	0	0	YAL01SD	2	973.451	0.047231	91.947
48	_FYAPELL_	0	0	YAL01SD	2	851.443	0.016235	109.8
49	_FYAPELL_	0	0	YAL01SD	2	851.443	0.016235	109.8
50	_GHHEAEIKPL_	0	0	YAL04SD	2	1129.59	0.00076903	118.63
51	_GLPQEVLNENLL_	0	0	YAL05SD	2	1337.72	0.0074343	102.94
52	_GLPQEVLNENLL_	0	0	YAL05SD	2	1337.72	0.001996	114.71
53	_GLSDGEWQ_	0	0	YAL04SD	2	890.377	0.035709	81.536
54	_GLSDGEWQ_	0	0	YAL04SD	2	890.377	0.00014128	110.1
55	_GLSDGEWQ_	0	0	YAL04SD	2	890.377	0.0028498	99.182
56	_GTDVQAWI_	0	0	YAL03SD	2	888.434	0.0011197	98.321
57	_GTDVQAWI_	0	0	YAL03SD	2	888.434	9.4231e-05	108.97
58	_HIQKEDVPSE_	0	0	YAL05SD	2	1180.57	4.1914e-10	152.93
59	_HIQKEDVPSE_	0	0	YAL05SD	2	1180.57	1.257e-05	128.53
60	_HIQKEDVPSE_	0	0	YAL05SD	2	1180.57	0.017293	96.769
61	_HLVDEPQ_	0	0	YAL01SD	2	836.403	0.056386	95.979
62	_HLVDEPQNLI_	0	0	YAL01SD	2	1176.61	0.018512	95.978
63	_HPEYAVSV_	0	0	YAL01SD	2	900.434	0.0058394	109.9
64	_HPEYAVSVLL_	0	0	YAL01SD	2	1126.6	0.02282	93.231
65	_HPEYAVSVLL_	0	0	YAL01SD	2	1126.6	0.0045492	105.09
66	_HPEYAVSVLL_	0	0	YAL01SD	2	1126.6	0.022819	93.207
67	_HPEYAVSVLL_	0	0	YAL01SD	2	1126.6	0.0034471	107.32
68	_HPGDFGADAQ_	0	0	YAL04SD	2	1013.42	0.00091526	118.01
69	_HPGDFGADAQ_	0	0	YAL04SD	2	1013.42	0.026343	90.921
70	_HPGDFGADAQ_	0	0	YAL04SD	2	1013.42	0.0026419	110.7
71	_HPGDFGADAQ_	0	0	YAL04SD	2	1013.42	0.00435	105.17
72	_HPGDFGADAQGA_	0	0	YAL04SD	2	1141.48	1.7443e-05	131.4
73	_HPGDFGADAQGA_	0	0	YAL04SD	2	1141.48	1.7837e-06	137.39
74	_HPGDFGADAQGA_	0	0	YAL04SD	2	1141.48	1.7835e-06	137.39
75	_HPGDFGADAQGA_	0	0	YAL04SD	2	1141.48	4.0133e-05	122.69
76	_HPGDFGADAQGAM(ox)_	0	0	YAL04SD	2	1288.51	0.0010749	111.64
77	_HPGDFGADAQGAM(ox)_	0	0	YAL04SD	2	1288.51	8.6185e-14	156.19
78	_HPGDFGADAQGAM(ox)_	0	0	YAL04SD	2	1288.51	6.6653e-15	169.53
79	_HPGDFGADAQGAM(ox)_	0	0	YAL04SD	2	1288.51	2.3572e-09	150.06
80	_HPGDFGADAQGAM(ox)_	0	0	YAL04SD	2	1288.51	6.1424e-09	143.15
81	_HPGDFGADAQGAM(ox)_	0	0	YAL04SD	2	1288.51	0.0010749	111.64
82	_HPGDFGADAQGAM(ox)_	0	0	YAL04SD	2	1288.51	9.885e-05	121.01
83	_HPGDFGADAQGAM(ox)_	0	0	YAL04SD	2	1288.51	2.3572e-09	150.06
84	_HPGDFGADAQGAM(ox)_	0	0	YAL04SD	2	1288.51	8.6185e-14	156.21
85	_HPGDFGADAQGAM_	0	0	YAL04SD	2	1272.52	4.2341e-07	137.74
86	_HPGDFGADAQGAM_	0	0	YAL04SD	2	1272.52	0.001435	108.18
87	_HPGDFGADAQGAM_	0	0	YAL04SD	2	1272.52	0.0002237	119.86
88	_HQGLPQEVLNEN_	0	0	YAL05SD	2	1376.67	0.045214	80.383
89	_HQGLPQEVLNEN_	0	0	YAL05SD	2	1376.67	3.8539e-10	153.92
90	_HQGLPQEVLNEN_	0	0	YAL05SD	2	1376.67	2.6714e-05	127.82
91	_HQGLPQEVLNEN_	0	0	YAL05SD	2	1376.67	0.0066462	103.64
92	_HQGLPQEVLNENL_	0	0	YAL05SD	2	1489.75	0.0038884	102.39
93	_HQGLPQEVLNENL_	0	0	YAL05SD	2	1489.75	0.0038884	102.39
94	_HQGLPQEVLNENL_	0	0	YAL05SD	2	1489.75	9.636e-05	121.08
95	_HQGLPQEVLNENL_	0	0	YAL05SD	2	1489.75	0.017511	87.801
96	_HQGLPQEVLNENLL_	0	0	YAL05SD	2	1602.84	1.2448e-20	172.19
97	_HQGLPQEVLNENLL_	0	0	YAL05SD	2	1602.84	2.7899e-09	145.42
98	_HQGLPQEVLNENLL_	0	0	YAL05SD	2	1602.84	8.8638e-21	176.42
99	_HQGLPQEVLNENLL_	0	0	YAL05SD	2	1602.84	1.4151e-14	167.09
100	_HQPHQPLPPTVM(ox)FPPQSV_	0	0	YAL02SD	3	2052.03	0.047924	65.752
101	_HQPHQPLPPTVM(ox)FPPQSV_	0	0	YAL02SD	3	2052.03	0.029213	70.891
102	_HQPHQPLPPTVM(ox)FPPQSV_	0	0	YAL02SD	3	2052.03	0.015353	77.967
103	_HQPHQPLPPTVM(ox)FPPQSVL_	0	0	YAL02SD	3	2165.11	0.014397	70.802
104	_HQPHQPLPPTVM(ox)FPPQSVL_	0	0	YAL02SD	3	2165.11	0.032115	64.578
105	_HQPHQPLPPTVM(ox)FPPQSVL_	0	0	YAL02SD	3	2165.11	0.007071	75.469
106	_HQPHQPLPPTVM(ox)FPPQSVL_	0	0	YAL02SD	3	2165.11	5.6429e-05	96.939
107	_HQPHQPLPPTVM(ox)FPPQSVL_	0	0	YAL02SD	3	2165.11	0.0067664	76.001
108	_IVSDGNGMNA_	0	0	YAL03SD	2	976.428	0.074499	76.851
109	_IVSDGNGMNA_	0	0	YAL03SD	2	976.428	1.5179e-05	126.55
110	_IVSDGNGM(ox)NAW_	0	0	YAL03SD	2	1178.5	0.052964	79.861
111	_IVSDGNGM(ox)NAW_	0	0	YAL03SD	2	1178.5	5.2372e-173	79.837
112	_IVSDGNGM(ox)NAW_	0	0	YAL03SD	2	1178.5	4.9538e-19	54.595
113	_IVSDGNGM(ox)NAWV_	0	0	YAL03SD	2	1277.57	0.0013226	117.14
114	_IVSDGNGM(ox)NAWV_	0	0	YAL03SD	2	1277.57	4.3445e-09	149.44
115	_KIVSDGNGM(ox)NAW_	0	0	YAL03SD	2	1306.6	0.021588	90.537
116	_KVPQVSTPTLVEVS_	0	0	YAL01SD	2	1482.83	0.028285	84.05
117	_KVPQVSTPTLVEVS_	0	0	YAL01SD	2	1482.83	0.0070379	92.58
118	_LETWKVELL_	0	0	YOR366W	2	1129.64	0.0031078	108.54
119	_LGEYGFQNAL_	0	0	YAL01SD	2	1110.53	0.0060419	104.07
120	_LGEYGFQNAL_	0	0	YAL01SD	2	1110.53	0.00062696	119.21
121	_LGEYGFQNALI_	0	0	YAL01SD	2	1223.62	0.03326	87.623
122	_LGEYGFQNALI_	0	0	YAL01SD	2	1223.62	2.4598e-05	129.56
123	_LGEYGFQNALIV_	0	0	YAL01SD	2	1322.69	0.01356	97.563
124	_LGEYGFQNALIV_	0	0	YAL01SD	2	1322.69	0.0013284	117.12
125	_LGEYGFQNALIV_	0	0	YAL01SD	2	1322.69	0.0034506	109.47
126	_LLYQEPVLGPV_	0	0	YAL02SD	2	1226.69	0.024536	92.469
127	_LLYQEPVLGPV_	0	0	YAL02SD	2	1226.69	2.4384e-05	129.63
128	_LSHKDDSPDLPK_	0	0	YAL01SD	3	1350.68	4.1155e-05	122.28
129	_LSHKDDSPDLPK_	0	0	YAL01SD	3	1350.68	4.1155e-05	122.32
130	_LTEELM(ox)QIT_	0	0	YKL165C	2	1092.54	1.5176e-286	92.451
131	_LVNELTEF_	0	0	YAL01SD	2	963.491	0.0058327	121.45
132	_LVNELTEFA_	0	0	YAL01SD	2	1034.53	0.0012977	116.33
133	_LVNELTEFA_	0	0	YAL01SD	2	1034.53	2.7779e-05	126.59
134	_LVVSTQT_	0	0	YAL01SD	1	746.417	0.042395	99.83
135	_LVVSTQTAL_	0	0	YAL01SD	2	930.539	0.06305	83.533
136	_LVVSTQTAL_	0	0	YAL01SD	2	930.539	0.0129	101.2
137	_LVVSTQTAL_	0	0	YAL01SD	2	930.539	3.8681e-05	122.08
138	_LVVSTQTAL_	0	0	YAL01SD	2	930.539	3.8681e-05	122.08
139	_LVVSTQTAL_	0	0	YAL01SD	2	930.539	2.7764e-05	126.59
140	_LVVSTQTALA_	0	0	YAL01SD	2	1001.58	0.054075	82.385
141	_LVVSTQTALA_	0	0	YAL01SD	2	1001.58	0.00046275	119.9
142	_LVVSTQTALA_	0	0	YAL01SD	2	1001.58	0.023358	92.833
143	_LVVSTQTALA_	0	0	YAL01SD	2	1001.58	0.00046275	119.9
144	_LVVSTQTALA_	0	0	YAL01SD	2	1001.58	1.8732e-05	123.85
145	_LYQEPVLGPV_	0	0	YAL02SD	2	1113.61	0.016381	97.36
146	_LYQEPVLGPV_	0	0	YAL02SD	2	1113.61	0.031189	88.586
147	_M(ox)HQPHQPLPPTVM(ox)FPPQSV_	0	0	YAL02SD	3	2199.06	0.03295	64.26
148	_M(ox)HQPHQPLPPTVM(ox)FPPQSV_	0	0	YAL02SD	3	2199.06	0.040412	61.629
149	_M(ox)HQPHQPLPPTVM(ox)FPPQSVL_	0	0	YAL02SD	3	2312.14	2.7541e-06	104.94
150	_M(ox)HQPHQPLPPTVM(ox)FPPQSVL_	0	0	YAL02SD	3	2312.14	0.032106	61.768
151	_M(ox)HQPHQPLPPTVM(ox)FPPQSVL_	0	0	YAL02SD	3	2312.14	6.2814e-05	92.066
152	_MNLILDF_	0	0	YIL017C	2	864.442	7.2589e-15	58.227
153	_NIVLRLVVLLFLAGNTLLLILM(ox)_	0	0	YML052W	2	2466.54	40.305	0
154	_NTDGSTDY_	0	0	YAL03SD	1	871.32	0.028108	98.531
155	_NTDGSTDY_	0	0	YAL03SD	1	871.32	0.033156	96.817
156	_NTDGSTDY_	0	0	YAL03SD	1	871.32	0.016273	102.63
157	_NTDGSTDYGILQ_	0	0	YAL03SD	2	1282.57	1.9704e-05	130.53
158	_NTDGSTDYGILQ_	0	0	YAL03SD	2	1282.57	8.728e-07	137.74
159	_PKATEEQL_	0	0	YAL01SD	2	914.471	0.004818	112.06
160	_PRSSLNEDSLYPKP_	0	0	YOR140W	2	1601.8	0.0042417	35.907
161	_QEPVLGPV_	0	0	YAL02SD	1	837.46	0.0020722	117.87
162	_QEPVLGPV_	0	0	YAL02SD	1	837.46	0.027119	98.896
163	_QGLPQEVLNEN_	0	0	YAL05SD	2	1239.61	3.9327e-05	124.47
164	_QGLPQEVLNEN_	0	0	YAL05SD	2	1239.61	0.020033	95.569
165	_QGLPQEVLNENLL_	0	0	YAL05SD	2	1465.78	1.4354e-09	151.74
166	_QGLPQEVLNENLL_	0	0	YAL05SD	2	1465.78	0.0015706	106.88
167	_QLDAYPSG_	0	0	YAL05SD	1	849.387	0.093793	82.648
168	_QLDAYPSGA_	0	0	YAL05SD	1	920.424	1.6683e-05	131.18
169	_QLDAYPSGA_	0	0	YAL05SD	1	920.424	0.026655	94.735
170	_QLDAYPSGAW_	0	0	YAL05SD	2	1106.5	0.015612	97.859
171	_QLDAYPSGAW_	0	0	YAL05SD	2	1106.5	4.0012e-21	171.8
172	_QLDAYPSGAW_	0	0	YAL05SD	1	1106.5	0.043622	112.27
173	_QLDAYPSGAW_	0	0	YAL05SD	2	1106.5	7.4655e-15	167.74
174	_QLDAYPSGAW_	0	0	YAL05SD	1	1106.5	0.023793	119.27
175	_QLDAYPSGAW_	0	0	YAL05SD	2	1106.5	0.0011408	117.03
176	_SALTPDETYVPK_	0	0	YAL01SD	2	1319.66	4.8581e-09	148.88
177	_SALTPDETYVPK_	0	0	YAL01SD	2	1319.66	7.5723e-05	121.68
178	_SHKDDSPDLPK_	0	0	YAL01SD	3	1237.59	0.0032786	112.36
179	_SLHTLFGDEL_	0	0	YAL01SD	2	1130.56	1.2504e-06	137.17
180	_SLHTLFGDEL_	0	0	YAL01SD	2	1130.56	1.2504e-06	137.17
181	_SLHTLFGDEL_	0	0	YAL01SD	2	1130.56	0.0034246	107.36
182	_SLTLTDVENL_	0	0	YAL02SD	2	1103.57	1.1802e-21	182.48
183	_SLTLTDVENL_	0	0	YAL02SD	2	1103.57	1.1802e-21	182.48
184	_SLVYPFPGPIPN_	0	0	YAL02SD	2	1299.69	0.016145	95.293
185	_SLVYPFPGPIPN_	0	0	YAL02SD	2	1299.69	0.029073	86.807
186	_(op)SM(ox)SGM(ox)SGMSSSDNSSSSGMDMDM_	0	1	YPR124W	2	2512.78	39.604	0
187	_SNFNTQATN_	0	0	YAL03SD	2	995.431	0.0016846	114.65
188	_SNFNTQATN_	0	0	YAL03SD	2	995.431	2.6427e-08	141.51
189	_SNIDIHSGGIDLA_	0	0	YNL247W	2	1310.65	0.01242	90.038
190	_TDAPSFSDIPN_	0	0	YAL05SD	2	1162.51	0.046965	82.208
191	_TDAPSFSDIPN_	0	0	YAL05SD	2	1162.51	0.028026	90.066
192	_TDAPSFSDIPNPIGSEN_	0	0	YAL05SD	2	1759.79	0.043012	74.789
193	_TDAPSFSDIPNPIGSENSE_	0	0	YAL05SD	2	1975.86	0.001928	85.579
194	_TDAPSFSDIPNPIGSENSE_	0	0	YAL05SD	2	1975.86	3.7423e-11	134.42
195	_TDAPSFSDIPNPIGSENSE_	0	0	YAL05SD	2	1975.86	1.9732e-18	160.09
196	_TDAPSFSDIPNPIGSENSE_	0	0	YAL05SD	2	1975.86	1.2767e-07	116.88
197	_TDAPSFSDIPNPIGSENSEK_	0	0	YAL05SD	2	2103.96	3.3506e-05	98.337
198	_TDAPSFSDIPNPIGSENSEK_	0	0	YAL05SD	2	2103.96	1.5572e-14	144.92
199	_TDAPSFSDIPNPIGSENSEK_	0	0	YAL05SD	2	2103.96	2.6412e-33	192.37
200	_TDAPSFSDIPNPIGSENSEK_	0	0	YAL05SD	2	2103.96	8.0726e-11	125.29
201	_TDGSTDY_	0	0	YAL03SD	1	757.277	0.062042	94.398
202	_TDVENLHLPLPL_	0	0	YAL02SD	2	1359.74	2.8009e-05	127.32
203	_TDVENLHLPLPL_	0	0	YAL02SD	2	1359.74	1.298e-08	139.68
204	_TLTDVENL_	0	0	YAL02SD	1	903.455	0.026103	99.221
205	_TLTDVENL_	0	0	YAL02SD	1	903.455	0.023547	100.1
206	_TLTDVENL_	0	0	YAL02SD	1	903.455	0.0020564	117.9
207	_TLTDVENL_	0	0	YAL02SD	1	903.455	0.00232	117.37
208	_TLTDVENLHLPLPL_	0	0	YAL02SD	2	1573.87	5.8215e-14	155.9
209	_TLTDVENLHLPLPL_	0	0	YAL02SD	2	1573.87	3.6048e-09	142.86
210	_TLTDVENLHLPLPL_	0	0	YAL02SD	2	1573.87	1.0371e-14	168.07
211	_TLTDVENLHLPLPL_	0	0	YAL02SD	2	1573.87	7.4108e-05	119.52
212	_VAPFPEVFG_	0	0	YAL05SD	2	961.491	0.0014726	115.59
213	_VAPFPEVFG_	0	0	YAL05SD	2	961.491	0.022088	96.882
214	_VK(op)SSHLSNN_	1	0	YDR295C	2	1160.53	0.034374	91.106
215	_VPQVSTPTLVEVS_	0	0	YAL01SD	2	1354.73	1.4654e-05	125.72
216	_YKELGFQG_	0	0	YAL04SD	2	940.465	0.047212	91.977
217	_YKELGFQG_	0	0	YAL04SD	2	940.465	0.04953	91.155
218	_YKELGFQG_	0	0	YAL04SD	2	940.465	0.0078364	105.68
219	_YPVEPFTESQ_	0	0	YAL02SD	2	1195.54	0.026874	90.553
220	_YPVEPFTESQ_	0	0	YAL02SD	2	1195.54	0.0077103	102.99

## Sheet: Table S2-2
id	Modified Sequence	OPA-lys-small	OPA-nterm-small	Proteins	Charge	Mass	PEP	Score
10	_(op)EGIHAQQ_	0	1	YAL05SD	2	897.398	0.052642	100.03
11	_(op)EGIHAQQ_	0	1	YAL05SD	1	897.398	0.63247	13.753
12	_(op)EGIHAQQ_	0	1	YAL05SD	2	897.398	0.15322	80.183
13	_(op)EGIHAQQ_	0	1	YAL05SD	2	897.398	0.25907	55.783
14	_(op)EGIHAQQ_	0	1	YAL05SD	2	897.398	0.0069723	127.44
74	_FFVAPFPEVFGK(op)E_	1	0	YAL05SD	2	1628.79	0.0022375	106.84
75	_FFVAPFPEVFGK(op)E_	1	0	YAL05SD	2	1628.79	0.087731	62.792
80	_FK(op)DLGEEH_	1	0	YAL01SD	2	1089.48	0.035137	116.43
81	_FK(op)DLGEEH_	1	0	YAL01SD	2	1089.48	0.035137	116.46
82	_FK(op)DLGEEH_	1	0	YAL01SD	2	1089.48	0.035137	116.46
83	_FK(op)DLGEEH_	1	0	YAL01SD	2	1089.48	0.046068	110.5
84	_FK(op)DLGEEHF_	1	0	YAL01SD	2	1236.55	0.097728	88.934
85	_FK(op)DLGEEHF_	1	0	YAL01SD	2	1236.55	0.047016	107.26
86	_FK(op)DLGEEHF_	1	0	YAL01SD	2	1236.55	0.047016	107.26
87	_FK(op)DLGEEHF_	1	0	YAL01SD	2	1236.55	0.24841	55.448
98	_GHHEAEIK(op)PL_	1	0	YAL04SD	3	1245.61	0.17413	60.22
99	_GHHEAEIK(op)PL_	1	0	YAL04SD	2	1245.61	0.13216	67.239
100	_GHHEAEIK(op)PL_	1	0	YAL04SD	2	1245.61	0.088166	80.296
101	_GHHEAEIK(op)PL_	1	0	YAL04SD	2	1245.61	0.32324	44.925
102	_(op)GHHEAEIK(op)PL_	1	1	YAL04SD	2	1361.64	0.2768	49.389
103	_(op)GHHEAEIK(op)PL_	1	1	YAL04SD	2	1361.64	0.20167	57.315
104	_(op)GHHEAEIK(op)PL_	1	1	YAL04SD	2	1361.64	0.22573	54.801
107	_GHHEAEIK(op)PLA_	1	0	YAL04SD	3	1316.65	0.52301	19.6
108	_GHHEAEIK(op)PLA_	1	0	YAL04SD	2	1316.65	0.35524	40.558
109	_GHHEAEIK(op)PLA_	1	0	YAL04SD	3	1316.65	0.46223	29.814
110	_GHHEAEIK(op)PLA_	1	0	YAL04SD	2	1316.65	0.45003	31.87
111	_(op)GHHEAEIK(op)PLA_	1	1	YAL04SD	2	1432.68	0.38036	38.34
112	_(op)GHHEAEIK(op)PLA_	1	1	YAL04SD	2	1432.68	0.4837	26.221
132	_HIQK(op)EDVPSE_	1	0	YAL05SD	2	1296.6	0.010951	130.33
133	_HIQK(op)EDVPSE_	1	0	YAL05SD	2	1296.6	0.41411	37.281
134	_HIQK(op)EDVPSE_	1	0	YAL05SD	2	1296.6	0.0096318	125.42
135	_HIQK(op)EDVPSE_	1	0	YAL05SD	2	1296.6	0.033754	108.36
136	_HIQK(op)EDVPSE_	1	0	YAL05SD	2	1296.6	0.081076	92.496
140	_(op)HIQK(op)EDVPSE_	1	1	YAL05SD	2	1412.62	0.051347	102.06
141	_(op)HIQK(op)EDVPSE_	1	1	YAL05SD	2	1412.62	0.082999	91.854
160	_(op)HPGDFGADAQ_	0	1	YAL04SD	2	1129.45	0.011885	116.62
161	_(op)HPGDFGADAQ_	0	1	YAL04SD	2	1129.45	0.088874	83.74
181	_HPIK(op)HQGLPQEVLNENL_	1	0	YAL05SD	3	2081.07	0.0371	69.195
182	_HPIK(op)HQGLPQEVLNENL_	1	0	YAL05SD	3	2081.07	0.00010163	99.946
183	_HPIK(op)HQGLPQEVLNENL_	1	0	YAL05SD	3	2081.07	0.00048879	89.436
184	_HPIK(op)HQGLPQEVLNENL_	1	0	YAL05SD	3	2081.07	0.25419	45.064
185	_HPIK(op)HQGLPQEVLNENLL_	1	0	YAL05SD	3	2194.15	0.00158	85.645
186	_HPIK(op)HQGLPQEVLNENLL_	1	0	YAL05SD	3	2194.15	0.10518	54.86
187	_HPIK(op)HQGLPQEVLNENLL_	1	0	YAL05SD	3	2194.15	3.03e-05	101.33
188	_HPIK(op)HQGLPQEVLNENLL_	1	0	YAL05SD	3	2194.15	0.15623	48.328
193	_(op)HQGLPQEVLNEN_	0	1	YAL05SD	2	1492.69	0.00018028	133.66
194	_(op)HQGLPQEVLNEN_	0	1	YAL05SD	2	1492.69	0.02499	86.381
199	_(op)HQGLPQEVLNENL_	0	1	YAL05SD	2	1605.78	0.00429	100.42
200	_(op)HQGLPQEVLNENL_	0	1	YAL05SD	2	1605.78	0.082298	63.994
205	_(op)HQGLPQEVLNENLL_	0	1	YAL05SD	2	1718.86	0.0028496	89.878
206	_(op)HQGLPQEVLNENLL_	0	1	YAL05SD	2	1718.86	5.2e-06	124.53
240	_K(op)EGIHAQQ_	1	0	YAL05SD	2	1025.49	0.040078	113.73
241	_K(op)EGIHAQQ_	1	0	YAL05SD	2	1025.49	0.14343	73.923
242	_K(op)GHHEAEIKPL_	1	0	YAL04SD	3	1373.71	0.054644	93.974
243	_K(op)GHHEAEIKPL_	1	0	YAL04SD	3	1373.71	0.038074	100.54
244	_K(op)GHHEAEIKPL_	1	0	YAL04SD	3	1373.71	0.44865	32.102
245	_K(op)GHHEAEIK(op)PL_	2	0	YAL04SD	3	1489.74	0.064882	78.783
246	_K(op)GHHEAEIK(op)PL_	2	0	YAL04SD	2	1489.74	0.34578	41.402
247	_K(op)GHHEAEIK(op)PL_	2	0	YAL04SD	3	1489.74	0.56198	13.478
252	_K(op)IVSDGNGM(ox)NAW_	1	0	YAL03SD	2	1422.62	0.12529	57.976
253	_K(op)IVSDGNGM(ox)NAW_	1	0	YAL03SD	2	1422.62	0.0041973	111.7
254	_K(op)IVSDGNGM(ox)NAW_	1	0	YAL03SD	2	1422.62	0.00040522	118.23
257	_K(op)IVSDGNGM(ox)NAWV_	1	0	YAL03SD	2	1521.69	0.030649	76.292
258	_K(op)IVSDGNGM(ox)NAWV_	1	0	YAL03SD	2	1521.69	0.27655	46.651
259	_K(op)IVSDGNGM(ox)NAWV_	1	0	YAL03SD	2	1521.69	0.15776	56.081
260	_K(op)IVSDGNGM(ox)NAWV_	1	0	YAL03SD	2	1521.69	0.022836	81.077
261	_K(op)VPQVSTPTLVEV_	1	0	YAL01SD	2	1511.82	0.014171	86.408
262	_K(op)VPQVSTPTLVEV_	1	0	YAL01SD	2	1511.82	0.031772	75.628
267	_K(op)VPQVSTPTLVEVS_	1	0	YAL01SD	2	1598.86	0.0010757	99.729
268	_K(op)VPQVSTPTLVEVS_	1	0	YAL01SD	2	1598.86	0.0014201	97.812
269	_K(op)VPQVSTPTLVEVS_	1	0	YAL01SD	2	1598.86	0.091666	64.41
279	_LHSM(ox)K(op)EGIHAQQ_	1	0	YAL05SD	3	1509.7	0.40767	33.052
280	_LHSM(ox)K(op)EGIHAQQ_	1	0	YAL05SD	3	1509.7	0.025595	85.783
281	_LHSM(ox)K(op)EGIHAQQ_	1	0	YAL05SD	2	1509.7	0.028532	82.483
282	_LHSM(ox)K(op)EGIHAQQ_	1	0	YAL05SD	3	1509.7	0.040962	73.794
283	_LHSM(ox)K(op)EGIHAQQ_	1	0	YAL05SD	2	1509.7	0.034226	76.156
284	_LHSM(ox)K(op)EGIHAQQ_	1	0	YAL05SD	3	1509.7	0.036783	74.863
285	_LHSM(ox)K(op)EGIHAQQ_	1	0	YAL05SD	2	1509.7	0.35332	38.024
286	_LHSM(ox)K(op)EGIHAQQ_	1	0	YAL05SD	3	1509.7	0.05312	70.588
287	_LHSM(ox)K(op)EGIHAQQ_	1	0	YAL05SD	2	1509.7	0.023585	87.936
288	_LHSM(ox)K(op)EGIHAQQ_	1	0	YAL05SD	3	1509.7	0.030884	79.904
289	_LHSM(ox)K(op)EGIHAQQ_	1	0	YAL05SD	2	1509.7	0.17787	53.578
290	_LHSM(ox)K(op)EGIHAQQ_	1	0	YAL05SD	3	1509.7	0.39816	33.931
293	_LHSMK(op)EGIHAQQ_	1	0	YAL05SD	3	1493.71	0.006025	108.56
294	_LHSMK(op)EGIHAQQ_	1	0	YAL05SD	3	1493.71	0.032326	78.283
296	_LK(op)HLVDEPQ_	1	0	YAL01SD	2	1193.61	0.098236	87.97
297	_LK(op)HLVDEPQ_	1	0	YAL01SD	2	1193.61	0.022502	125.23
298	_LK(op)HLVDEPQ_	1	0	YAL01SD	2	1193.61	0.77253	8.5167
300	_LK(op)HLVDEPQNL_	1	0	YAL01SD	2	1420.74	0.064663	75.991
301	_LK(op)HLVDEPQNL_	1	0	YAL01SD	2	1420.74	0.10947	64.239
302	_LK(op)HLVDEPQNLI_	1	0	YAL01SD	2	1533.82	0.0050334	110.24
303	_LK(op)HLVDEPQNLI_	1	0	YAL01SD	2	1533.82	0.00031623	124.05
304	_LK(op)HLVDEPQNLI_	1	0	YAL01SD	2	1533.82	0.0002256	130.01
305	_LK(op)HLVDEPQNLI_	1	0	YAL01SD	2	1533.82	0.032175	78.475
311	_LSHK(op)DDSPDLPK(op)_	2	0	YAL01SD	2	1582.73	0.49245	19.467
312	_LSHK(op)DDSPDLPK(op)_	2	0	YAL01SD	2	1582.73	0.034231	76.223
313	_LSHK(op)DDSPDLPK(op)_	2	0	YAL01SD	2	1582.73	0.40442	33.329
316	_LSHK(op)DDSPDLPK_	1	0	YAL01SD	3	1466.7	0.0064019	107.91
317	_LSHK(op)DDSPDLPK_	1	0	YAL01SD	3	1466.7	0.00028283	126.29
318	_LTEEK(op)KET_	1	0	YKR095W	2	1092.53	0.0083131	37.423
319	_LTEEK(op)KET_	1	0	YKR095W	2	1092.53	0	121.95
320	_LTEEKK(op)ET_	1	0	YKR095W	2	1092.53	0.12142	84.865
371	_(op)NTDGSTDY_	0	1	YAL03SD	1	987.346	0.24274	51.319
372	_(op)NTDGSTDY_	0	1	YAL03SD	1	987.346	0.10633	91.391
377	_PK(op)ATEEQL_	1	0	YAL01SD	1	1030.5	0.13754	92.427
399	_SALTPDETYVPK(op)_	1	0	YAL01SD	2	1435.69	0.16844	54.371
400	_SALTPDETYVPK(op)_	1	0	YAL01SD	2	1435.69	0.03261	77.993
401	_SALTPDETYVPK(op)_	1	0	YAL01SD	2	1435.69	0.07581	64.651
402	_SALTPDETYVPK(op)_	1	0	YAL01SD	2	1435.69	0.5705	2.5514
406	_SHK(op)DDSPDLPK(op)_	2	0	YAL01SD	2	1469.65	0.34997	41.052
407	_SHK(op)DDSPDLPK(op)_	2	0	YAL01SD	2	1469.65	0.030484	103.55
408	_SHK(op)DDSPDLPK(op)_	2	0	YAL01SD	2	1469.65	0.025546	105.99
409	_SHK(op)DDSPDLPK(op)_	2	0	YAL01SD	2	1469.65	0.098197	66.995
412	_SHK(op)DDSPDLPK_	1	0	YAL01SD	3	1353.62	0.31778	43.948
413	_SHK(op)DDSPDLPK_	1	0	YAL01SD	2	1353.62	0.2713	48.016
414	_SHK(op)DDSPDLPK_	1	0	YAL01SD	3	1353.62	0.065408	85.568
415	_SHK(op)DDSPDLPK_	1	0	YAL01SD	2	1353.62	0.0007996	142.97
443	_TDAPSFSDIPNPIGSENSEK(op)_	1	0	YAL05SD	2	2219.99	2.51e-31	195.34
444	_TDAPSFSDIPNPIGSENSEK(op)_	1	0	YAL05SD	3	2219.99	3.55e-27	185.16
445	_TDAPSFSDIPNPIGSENSEK(op)_	1	0	YAL05SD	2	2219.99	9.67e-27	177.29
446	_TDAPSFSDIPNPIGSENSEK(op)_	1	0	YAL05SD	3	2219.99	1.46e-13	125.54
447	_TDDDVGEDYSDFM(ox)K(op)ELEM(ox)SEESD_	1	0	YER162C	2	2833.03	162.64	0
473	_YK(op)ELGFQG_	1	0	YAL04SD	2	1056.49	0.15316	71.523
474	_YK(op)ELGFQG_	1	0	YAL04SD	1	1056.49	0.2097	71.074
475	_YK(op)ELGFQG_	1	0	YAL04SD	2	1056.49	0.17524	66.073
476	_YK(op)ELGFQG_	1	0	YAL04SD	1	1056.49	0.20347	73.643
477	_YK(op)ELGFQG_	1	0	YAL04SD	2	1056.49	0.12991	79.94
478	_YK(op)ELGFQG_	1	0	YAL04SD	1	1056.49	0.2097	71.05
479	_YK(op)ELGFQG_	1	0	YAL04SD	2	1056.49	0.12991	79.94
480	_YK(op)ELGFQG_	1	0	YAL04SD	1	1056.49	0.2097	71.05

## Sheet: Table S2-3
id	Modified Sequence	OPA-lys-small	OPA-nterm-small	Proteins	Charge	Mass	PEP	Score
0	_ALTPDETYVPK_	0	0	YAL01SD	2	1232.63	0.086539	76.863
1	_ALTPDETYVPK_	0	0	YAL01SD	2	1232.63	0.086539	76.863
2	_ALTPDETYVPK_	0	0	YAL01SD	2	1232.63	0.063543	83.152
3	_ALTPDETYVPK_	0	0	YAL01SD	2	1232.63	0.021582	99.61
4	_AQTQSLVYPFPGPIPN_	0	0	YAL02SD	2	1727.89	1.9446e-07	144.36
5	_AQTQSLVYPFPGPIPN_	0	0	YAL02SD	2	1727.89	3.303e-05	130.14
6	_AQTQSLVYPFPGPIPN_	0	0	YAL02SD	2	1727.89	0.0015105	120.14
7	_AQTQSLVYPFPGPIPN_	0	0	YAL02SD	2	1727.89	0.0029349	113.11
8	_AQTQSLVYPFPGPIPN_	0	0	YAL02SD	3	1727.89	0.0011479	121.95
9	_ATEEQLKTVMEN_	0	0	YAL01SD	2	1391.66	0.015267	95.49
10	_ATEEQLKTVMEN_	0	0	YAL01SD	2	1391.66	0.27669	48.719
11	_ATEEQLKTVMEN_	0	0	YAL01SD	2	1391.66	0.17943	56.401
12	_ATEEQLKTVM(ox)EN_	0	0	YAL01SD	2	1407.66	0.18516	55.947
13	_AYFYPEL_	0	0	YAL05SD	1	901.422	0.24094	58.249
14	_AYFYPEL_	0	0	YAL05SD	2	901.422	0.12028	88.385
15	_AYFYPEL_	0	0	YAL05SD	1	901.422	0.36293	40.555
16	_AYFYPEL_	0	0	YAL05SD	2	901.422	0.019317	108.81
17	_AYFYPEL_	0	0	YAL05SD	1	901.422	0.2712	54.445
18	_AYFYPEL_	0	0	YAL05SD	1	901.422	0.36293	40.555
19	_AYFYPEL_	0	0	YAL05SD	2	901.422	0.12201	72.305
20	_DAFLGSFLYEYSR_	0	0	YAL01SD	2	1566.74	0.0027309	116.32
21	_DAFLGSFLYEYSR_	0	0	YAL01SD	2	1566.74	0.00041545	132.38
22	_DAIPENLPPLTADF_	0	0	YAL01SD	2	1511.75	0.36836	36.964
23	_DAIPENLPPLTADF_	0	0	YAL01SD	2	1511.75	0.1081	62.289
24	_DAIPENLPPLTADF_	0	0	YAL01SD	2	1511.75	0.28117	43.374
25	_DAIPENLPPLTADF_	0	0	YAL01SD	2	1511.75	4.8926e-21	72.446
26	_DAIPENLPPLTADF_	0	0	YAL01SD	2	1511.75	0.0075187	35.971
27	_DAIPENLPPLTADFAED_	0	0	YAL01SD	2	1826.86	0.00065017	115.63
28	_DAIPENLPPLTADFAEDK_	0	0	YAL01SD	2	1954.95	4.0332e-06	137.33
29	_DAIPENLPPLTADFAEDK_	0	0	YAL01SD	2	1954.95	7.0125e-06	132.26
30	_DAIPENLPPLTADFAEDK_	0	0	YAL01SD	2	1954.95	0.00093976	106.34
31	_DAIPENLPPLTADFAEDK_	0	0	YAL01SD	2	1954.95	0.0001075	124.55
32	_DDSPDLPK_	0	0	YAL01SD	2	885.408	0.14332	70.978
33	_DDSPDLPK_	0	0	YAL01SD	2	885.408	0.13186	72.563
34	_DDSPDLPK_	0	0	YAL01SD	1	885.408	0.61482	15.885
35	_DDSPDLPK_	0	0	YAL01SD	2	885.408	0.025712	95.392
36	_DDSPDLPK_	0	0	YAL01SD	1	885.408	0.54493	34.936
37	_DDSPDLPK_	0	0	YAL01SD	2	885.408	2.3723e-42	84.692
38	_DDSPDLPK_	0	0	YAL01SD	2	885.408	2.3723e-42	84.692
39	_DIPNPIGSENSE_	0	0	YAL05SD	2	1270.57	0.0055287	113.57
40	_DTHKSEIA_	0	0	YAL01SD	2	899.435	0.050677	88.548
41	_DTHKSEIA_	0	0	YAL01SD	1	899.435	0.3303	63.372
42	_DTHKSEIA_	0	0	YAL01SD	2	899.435	0.050814	88.466
43	_DTHKSEIA_	0	0	YAL01SD	2	899.435	0.043867	90.219
44	_DTHKSEIA_	0	0	YAL01SD	1	899.435	0.35515	59.798
45	_DTHKSEIA_	0	0	YAL01SD	2	899.435	0.31477	51.924
46	_DTHKSEIA_	0	0	YAL01SD	2	899.435	0.025712	95.417
47	_EGIHAQQKEPM(ox)IGVNQELA_	0	0	YAL05SD	3	2107.04	0.073335	58.04
48	_EGIHAQQKEPM(ox)IGVNQELA_	0	0	YAL05SD	3	2107.04	0.26803	40.005
49	_EGIHAQQKEPM(ox)IGVNQELA_	0	0	YAL05SD	3	2107.04	0.0035774	85.977
50	_EGIHAQQKEPM(ox)IGVNQELA_	0	0	YAL05SD	3	2107.04	0.087471	56.232
51	_EGIHAQQKEPM(ox)IGVNQELA_	0	0	YAL05SD	3	2107.04	0.0079327	76.916
52	_EGIHAQQKEPMIGVNQELA_	0	0	YAL05SD	3	2091.04	0.0097068	76.224
53	_EGIHAQQKEPMIGVNQELA_	0	0	YAL05SD	3	2091.04	0.053698	60.461
54	_EKTPVSEKV_	0	0	YAL01SD	2	1015.55	0.035639	88.77
55	_EKTPVSEKV_	0	0	YAL01SD	2	1015.55	0.035767	88.726
56	_EKVNELS_	0	0	YAL05SD;YBR208C	2	817.418	0.0043843	113.32
57	_EKVNELS_	0	0	YAL05SD;YBR208C	1	817.418	0.3925	33.091
58	_EKVNELS_	0	0	YAL05SD;YBR208C	2	817.418	0.0046735	112.35
59	_EKVNELS_	0	0	YAL05SD;YBR208C	1	817.418	0.37435	40.504
60	_EKVNELS_	0	0	YAL05SD;YBR208C	2	817.418	0.0043843	113.29
61	_EKVNELS_	0	0	YAL05SD;YBR208C	1	817.418	0.3689	42.839
62	_EKVNELS_	0	0	YAL05SD;YBR208C	1	817.418	0.3882	35.952
63	_EKVNELS_	0	0	YAL05SD;YBR208C	2	817.418	1.1829e-05	129.37
64	_EPM(ox)IGVNQ_	0	0	YAL05SD	2	902.417	0.02418	96.37
65	_EPMIGVNQ_	0	0	YAL05SD	2	886.422	0.0013045	103.18
66	_EPMIGVNQ_	0	0	YAL05SD	2	886.422	0.26693	45.366
67	_EPM(ox)IGVNQE_	0	0	YAL05SD	2	1031.46	0.5415	35.99
68	_EPM(ox)IGVNQE_	0	0	YAL05SD	2	1031.46	0.0106	104.9
69	_EPM(ox)IGVNQE_	0	0	YAL05SD	2	1031.46	0.5415	36.014
70	_EPMIGVNQE_	0	0	YAL05SD	2	1015.46	0.013316	101.79
71	_EPMIGVNQE_	0	0	YAL05SD	2	1015.46	0.0092002	106.48
72	_EPM(ox)IGVNQEL_	0	0	YAL05SD	2	1144.54	0.0066202	117.7
73	_EPM(ox)IGVNQEL_	0	0	YAL05SD	2	1144.54	0.11565	72.131
74	_EPM(ox)IGVNQEL_	0	0	YAL05SD	2	1144.54	0.021553	95.606
75	_EPM(ox)IGVNQEL_	0	0	YAL05SD	2	1144.54	0.37831	48.644
76	_EPM(ox)IGVNQEL_	0	0	YAL05SD	2	1144.54	0.050421	85.215
77	_EPM(ox)IGVNQEL_	0	0	YAL05SD	2	1144.54	0.0091752	112.8
78	_EPM(ox)IGVNQEL_	0	0	YAL05SD	2	1144.54	0.050421	85.239
79	_EPM(ox)IGVNQEL_	0	0	YAL05SD	2	1144.54	0.059512	82.289
80	_EPM(ox)IGVNQEL_	0	0	YAL05SD	2	1144.54	0.027679	92.558
81	_EPMIGVNQEL_	0	0	YAL05SD	2	1128.55	0.01248	107.77
82	_EPM(ox)IGVNQELA_	0	0	YAL05SD	2	1215.58	0.0077788	119.18
83	_EPM(ox)IGVNQELA_	0	0	YAL05SD	2	1215.58	0.029257	93.149
84	_EPM(ox)IGVNQELA_	0	0	YAL05SD	2	1215.58	0.0023718	128.64
85	_EPM(ox)IGVNQELA_	0	0	YAL05SD	2	1215.58	0.00086259	138.56
86	_EPM(ox)IGVNQELA_	0	0	YAL05SD	2	1215.58	0.029257	93.125
87	_EPM(ox)IGVNQELA_	0	0	YAL05SD	2	1215.58	0.016756	105.98
88	_EPM(ox)IGVNQELA_	0	0	YAL05SD	2	1215.58	0.012374	111.88
89	_EPM(ox)IGVNQELA_	0	0	YAL05SD	2	1215.58	0.00069741	139.65
90	_EPM(ox)IGVNQELA_	0	0	YAL05SD	2	1215.58	0.016756	105.93
91	_EPM(ox)IGVNQELA_	0	0	YAL05SD	2	1215.58	0.0080739	118.69
92	_EPM(ox)IGVNQELA_	0	0	YAL05SD	2	1215.58	0.75428	23.529
93	_EPMIGVNQELA_	0	0	YAL05SD	2	1199.59	0.01614	106.76
94	_EPMIGVNQELA_	0	0	YAL05SD	2	1199.59	0.012405	111.81
95	_EPMIGVNQELA_	0	0	YAL05SD	2	1199.59	0.0096511	116.18
96	_EPMIGVNQELA_	0	0	YAL05SD	2	1199.59	0.00079054	139.04
97	_EPMIGVNQELA_	0	0	YAL05SD	2	1199.59	0.0017387	132.82
98	_EVLNENLL_	0	0	YAL05SD	1	942.502	0.089504	78.975
99	_FESNFNT_	0	0	YAL03SD	1	857.356	0.12692	91.568
100	_FESNFNT_	0	0	YAL03SD	1	857.356	0.2131	70.331
101	_FESNFNT_	0	0	YAL03SD	1	857.356	0.12317	92.495
102	_FESNFNT_	0	0	YAL03SD	2	857.356	0.5418	17.092
103	_FESNFNT_	0	0	YAL03SD	1	857.356	0.11384	96.458
104	_FESNFNTQ_	0	0	YAL03SD	2	985.414	8.2531e-05	126.63
105	_FESNFNTQ_	0	0	YAL03SD	1	985.414	0.010604	120.62
106	_FESNFNTQ_	0	0	YAL03SD	2	985.414	0.21573	61.112
107	_FESNFNTQ_	0	0	YAL03SD	2	985.414	7.1741e-07	141.51
108	_FESNFNTQ_	0	0	YAL03SD	1	985.414	0.015903	116.36
109	_FESNFNTQ_	0	0	YAL03SD	2	985.414	1.1281e-06	140.04
110	_FESNFNTQ_	0	0	YAL03SD	1	985.414	0.039102	106.78
111	_FESNFNTQ_	0	0	YAL03SD	2	985.414	7.1741e-07	141.51
112	_FESNFNTQ_	0	0	YAL03SD	1	985.414	0.010709	121.98
113	_FESNFNTQA_	0	0	YAL03SD	2	1056.45	0.011936	103.35
114	_FESNFNTQA_	0	0	YAL03SD	2	1056.45	0.0033143	117.51
115	_FESNFNTQA_	0	0	YAL03SD	2	1056.45	4.4564e-07	147.42
116	_FESNFNTQA_	0	0	YAL03SD	2	1056.45	0.0033143	117.49
117	_FESNFNTQAT_	0	0	YAL03SD	2	1157.5	2.5e-24	209.95
118	_FESNFNTQAT_	0	0	YAL03SD	2	1157.5	2.4477e-06	156.71
119	_FESNFNTQAT_	0	0	YAL03SD	2	1157.5	1.522e-15	183.26
120	_FESNFNTQAT_	0	0	YAL03SD	1	1157.5	0.68905	33.303
121	_FESNFNTQAT_	0	0	YAL03SD	2	1157.5	2.2029e-33	224.97
122	_FESNFNTQAT_	0	0	YAL03SD	1	1157.5	0.0061653	145.64
123	_FESNFNTQAT_	0	0	YAL03SD	2	1157.5	9.6955e-33	216.54
124	_FESNFNTQAT_	0	0	YAL03SD	1	1157.5	0.0075154	126.07
125	_FESNFNTQATN_	0	0	YAL03SD	2	1271.54	0.00078322	139.13
126	_FESNFNTQATN_	0	0	YAL03SD	2	1271.54	0.14656	32.068
127	_FESNFNTQATN_	0	0	YAL03SD	2	1271.54	1.6013e-29	79.797
128	_FESNFNTQATN_	0	0	YAL03SD	2	1271.54	0.006469	121.23
129	_FESNFNTQATN_	0	0	YAL03SD	2	1271.54	5.3295e-23	209.55
130	_FESNFNTQATN_	0	0	YAL03SD	2	1271.54	1.2123e-31	223.47
131	_FFVAPFPEV_	0	0	YAL05SD	1	1051.54	0.16486	66.681
132	_FFVAPFPEV_	0	0	YAL05SD	2	1051.54	3.8316e-05	123.78
133	_FFVAPFPEV_	0	0	YAL05SD	2	1051.54	0.0023198	106.95
134	_FFVAPFPEV_	0	0	YAL05SD	2	1051.54	3.8316e-05	123.78
135	_FFVAPFPEV_	0	0	YAL05SD	1	1051.54	0.050955	83.491
136	_FFVAPFPEV_	0	0	YAL05SD	2	1051.54	0.013604	96.204
137	_FFVAPFPEV_	0	0	YAL05SD	1	1051.54	0.050955	83.491
138	_FFVAPFPEV_	0	0	YAL05SD	2	1051.54	5.1488e-30	53.579
139	_FFVAPFPEV_	0	0	YAL05SD	2	1051.54	0.17499	7.4104
140	_FFVAPFPEVFG_	0	0	YAL05SD	2	1255.63	0.011348	113.49
141	_FFVAPFPEVFG_	0	0	YAL05SD	2	1255.63	3.2891e-114	115.59
142	_FFVAPFPEVFG_	0	0	YAL05SD	2	1255.63	0.0016873	133.11
143	_FFVAPFPEVFG_	0	0	YAL05SD	2	1255.63	0.0020113	130.97
144	_FFVAPFPEVFGKE_	0	0	YAL05SD	2	1512.77	5.8698e-06	150.83
145	_FFVAPFPEVFGKE_	0	0	YAL05SD	2	1512.77	3.1506e-06	155.42
146	_FFVAPFPEVFGKE_	0	0	YAL05SD	2	1512.77	5.9571e-06	150.68
147	_FFVAPFPEVFGKE_	0	0	YAL05SD	3	1512.77	0.37259	38.868
148	_FFVAPFPEVFGKE_	0	0	YAL05SD	2	1512.77	5.8505e-05	142.79
149	_FFVAPFPEVFGKE_	0	0	YAL05SD	2	1512.77	0.014486	93.819
150	_FKDLGEEH_	0	0	YAL01SD	2	973.451	0.066727	84.563
151	_FKDLGEEH_	0	0	YAL01SD	2	973.451	0.068698	84.079
152	_FKDLGEEH_	0	0	YAL01SD	2	973.451	0.066727	84.587
153	_FKDLGEEH_	0	0	YAL01SD	2	973.451	0.068698	84.079
154	_FKDLGEEHF_	0	0	YAL01SD	2	1120.52	0.0058645	110.25
155	_FKDLGEEHF_	0	0	YAL01SD	2	1120.52	0.013942	101.1
156	_FKDLGEEHF_	0	0	YAL01SD	2	1120.52	0.065698	78.409
157	_FKDLGEEHFK_	0	0	YAL01SD	3	1248.61	8.5788e-10	167.84
158	_FPKAEFVEV_	0	0	YAL01SD	2	1064.55	0.060588	80.17
159	_FPKAEFVEV_	0	0	YAL01SD	2	1064.55	0.060588	80.219
160	_FPKAEFVEV_	0	0	YAL01SD	2	1064.55	0.15604	67.647
161	_FPKAEFVEV_	0	0	YAL01SD	2	1064.55	0.18063	64.888
162	_FPKAEFVEVT_	0	0	YAL01SD	2	1165.6	0.01385	105.97
163	_FPKAEFVEVT_	0	0	YAL01SD	2	1165.6	0.013207	106.86
164	_FPKAEFVEVT_	0	0	YAL01SD	2	1165.6	0.047192	86.254
165	_FPKAEFVEVT_	0	0	YAL01SD	2	1165.6	0.044557	87.102
166	_FVAPFPEVFGKE_	0	0	YAL05SD	2	1365.7	0.019933	92.196
167	_FYAPELL_	0	0	YAL01SD	1	851.443	0.38227	33.136
168	_FYAPELL_	0	0	YAL01SD	2	851.443	0.079243	102.78
169	_FYAPELL_	0	0	YAL01SD	2	851.443	0.079243	102.78
170	_FYAPELL_	0	0	YAL01SD	1	851.443	0.38227	33.112
171	_FYAPELL_	0	0	YAL01SD	1	851.443	0.41716	26.037
172	_FYAPELL_	0	0	YAL01SD	2	851.443	0.14734	83.864
173	_FYAPELL_	0	0	YAL01SD	1	851.443	0.36128	41.213
174	_FYAPELL_	0	0	YAL01SD	2	851.443	0.12024	90.33
175	_FYAPELL_	0	0	YAL01SD	2	851.443	0.71561	1.5007
176	_GFQNALIV_	0	0	YAL01SD	1	860.476	0.69161	11.093
177	_GFQNALIV_	0	0	YAL01SD	2	860.476	0.063094	80.993
178	_GFQNALIV_	0	0	YAL01SD	2	860.476	0.063094	66.31
179	_GFQNALIV_	0	0	YAL01SD	1	860.476	0.67245	13.052
180	_GFQNALIV_	0	0	YAL01SD	1	860.476	0.69161	11.093
181	_GFQNALIV_	0	0	YAL01SD	2	860.476	0.15779	66.286
182	_GFQNALIV_	0	0	YAL01SD	1	860.476	0.69161	11.093
183	_GFQNALIV_	0	0	YAL01SD	2	860.476	0.063094	80.993
184	_GHHEAEIKPL_	0	0	YAL04SD	2	1129.59	0.00099173	133.03
185	_GHHEAEIKPL_	0	0	YAL04SD	2	1129.59	0.0061302	118.61
186	_GHHEAEIKPL_	0	0	YAL04SD	2	1129.59	0.96357	3.1335
187	_GHHEAEIKPL_	0	0	YAL04SD	2	1129.59	0.56245	36.304
188	_GHHEAEIKPLA_	0	0	YAL04SD	3	1200.63	0.010289	115.19
189	_GHHEAEIKPLA_	0	0	YAL04SD	2	1200.63	0.024802	95.39
190	_GHHEAEIKPLA_	0	0	YAL04SD	2	1200.63	0.025245	94.811
191	_GHPETLEKFD_	0	0	YAL04SD	2	1171.55	0.067863	79.601
192	_GHPETLEKFD_	0	0	YAL04SD	2	1171.55	0.15274	67.372
193	_GLPQEVLNENLL_	0	0	YAL05SD	2	1337.72	0.22791	52.572
194	_GLPQEVLNENLL_	0	0	YAL05SD	2	1337.72	0.003583	120.09
195	_GLPQEVLNENLL_	0	0	YAL05SD	2	1337.72	0.0051549	114.82
196	_GLPQEVLNENLL_	0	0	YAL05SD	2	1337.72	0.00040694	139.28
197	_GLSDGEWQ_	0	0	YAL04SD	1	890.377	0.44203	38.642
198	_GLSDGEWQ_	0	0	YAL04SD	2	890.377	0.020074	85.106
199	_GLSDGEWQ_	0	0	YAL04SD	1	890.377	0.34749	48.888
200	_GLSDGEWQ_	0	0	YAL04SD	2	890.377	0.026053	82.109
201	_GLSDGEWQ_	0	0	YAL04SD	1	890.377	0.36689	47.126
202	_GLSDGEWQ_	0	0	YAL04SD	2	890.377	0.34589	50.612
203	_GLSDGEWQ_	0	0	YAL04SD	1	890.377	0.36689	47.126
204	_GLSDGEWQ_	0	0	YAL04SD	2	890.377	0.0014817	95.536
205	_GLSDGEWQ_	0	0	YAL04SD	1	890.377	0.39419	44.614
206	_GLSDGEWQ_	0	0	YAL04SD	2	890.377	0.021047	82.569
207	_(ac)GLSDGEWQ_	0	0	YAL04SD	1	932.388	0.37223	46.611
208	_(ac)GLSDGEWQ_	0	0	YAL04SD	1	932.388	0.13698	71.843
209	_GTDVQAWI_	0	0	YAL03SD	2	888.434	0.1967	63.73
210	_GTDVQAWI_	0	0	YAL03SD	1	888.434	0.52221	38.62
211	_GTDVQAWI_	0	0	YAL03SD	1	888.434	0.44655	48.989
212	_GTDVQAWI_	0	0	YAL03SD	2	888.434	2.3349e-06	135.6
213	_GTDVQAWI_	0	0	YAL03SD	1	888.434	0.6611	21.961
214	_GYSLGNWV_	0	0	YAL03SD	1	894.424	0.27128	55.903
215	_GYSLGNWV_	0	0	YAL03SD	2	894.424	0.00058246	100.24
216	_GYSLGNWV_	0	0	YAL03SD	1	894.424	0.23822	58.971
217	_GYSLGNWV_	0	0	YAL03SD	2	894.424	0.00058246	100.24
218	_GYSLGNWV_	0	0	YAL03SD	1	894.424	0.23822	58.971
219	_GYSLGNWV_	0	0	YAL03SD	2	894.424	0.10836	59.699
220	_GYSLGNWV_	0	0	YAL03SD	1	894.424	0.2311	59.602
221	_GYSLGNWV_	0	0	YAL03SD	2	894.424	0.013223	84.955
222	_HEKTPVSE_	0	0	YAL01SD	2	925.451	0.0072723	107.15
223	_HEKTPVSE_	0	0	YAL01SD	2	925.451	0.085197	80.032
224	_HIQKEDVPSE_	0	0	YAL05SD	2	1180.57	0.00078891	135.31
225	_HIQKEDVPSE_	0	0	YAL05SD	2	1180.57	0.0010942	131.82
226	_HIQKEDVPSE_	0	0	YAL05SD	2	1180.57	0.21278	60.134
227	_HIQKEDVPSE_	0	0	YAL05SD	2	1180.57	0.013583	106.28
228	_HIQKEDVPSE_	0	0	YAL05SD	2	1180.57	7.1287e-10	169.49
229	_HIQKEDVPSE_	0	0	YAL05SD	2	1180.57	0.0025979	125.34
230	_HIQKEDVPSE_	0	0	YAL05SD	2	1180.57	0.80539	17.713
231	_HIQKEDVPSER_	0	0	YAL05SD	3	1336.67	0.0089201	117.34
232	_HLVDEPQNL_	0	0	YAL01SD	2	1063.53	0.03119	90.328
233	_HLVDEPQNL_	0	0	YAL01SD	2	1063.53	0.034282	89.238
234	_HLVDEPQNL_	0	0	YAL01SD	2	1063.53	0.074331	76.838
235	_HLVDEPQNL_	0	0	YAL01SD	2	1063.53	0.088249	75.253
236	_HLVDEPQNLI_	0	0	YAL01SD	2	1176.61	0.098656	74.358
237	_HLVDEPQNLI_	0	0	YAL01SD	2	1176.61	0.020456	97.034
238	_HLVDEPQNLI_	0	0	YAL01SD	2	1176.61	0.04511	86.9
239	_HLVDEPQNLI_	0	0	YAL01SD	2	1176.61	0.010579	110.33
240	_HPEYAVSV_	0	0	YAL01SD	2	900.434	0.077466	81.952
241	_HPEYAVSV_	0	0	YAL01SD	1	900.434	0.6022	29.588
242	_HPEYAVSV_	0	0	YAL01SD	2	900.434	0.37581	46.281
243	_HPEYAVSVL_	0	0	YAL01SD	2	1013.52	0.02848	91.238
244	_HPEYAVSVL_	0	0	YAL01SD	1	1013.52	0.61344	46.088
245	_HPEYAVSVL_	0	0	YAL01SD	2	1013.52	0.16441	66.732
246	_HPEYAVSVL_	0	0	YAL01SD	2	1013.52	0.62094	29.207
247	_HPEYAVSVLL_	0	0	YAL01SD	2	1126.6	0.02	97.649
248	_HPEYAVSVLL_	0	0	YAL01SD	1	1126.6	0.076891	101.58
249	_HPEYAVSVLL_	0	0	YAL01SD	2	1126.6	0.025588	93.231
250	_HPEYAVSVLL_	0	0	YAL01SD	2	1126.6	0.025588	93.231
251	_HPEYAVSVLL_	0	0	YAL01SD	2	1126.6	0.012851	107.29
252	_HPEYAVSVLL_	0	0	YAL01SD	2	1126.6	0.44543	43.993
253	_HPGDFGADAQ_	0	0	YAL04SD	2	1013.42	0.012482	107.81
254	_HPGDFGADAQ_	0	0	YAL04SD	1	1013.42	0.61767	38.779
255	_HPGDFGADAQ_	0	0	YAL04SD	1	1013.42	0.33083	58.278
256	_HPGDFGADAQ_	0	0	YAL04SD	2	1013.42	0.014413	105.17
257	_HPGDFGADAQ_	0	0	YAL04SD	1	1013.42	0.8654	25.17
258	_HPGDFGADAQ_	0	0	YAL04SD	2	1013.42	0.018905	99.17
259	_HPGDFGADAQ_	0	0	YAL04SD	1	1013.42	0.49096	47.831
260	_HPGDFGADAQGA_	0	0	YAL04SD	2	1141.48	3.6204e-05	143.87
261	_HPGDFGADAQGA_	0	0	YAL04SD	2	1141.48	0.00069876	135.72
262	_HPGDFGADAQGA_	0	0	YAL04SD	2	1141.48	0.00069876	135.67
263	_HPGDFGADAQGA_	0	0	YAL04SD	2	1141.48	0.0022815	124.4
264	_HPGDFGADAQGAM(ox)_	0	0	YAL04SD	2	1288.51	2.7162e-06	156.16
265	_HPGDFGADAQGAM(ox)_	0	0	YAL04SD	2	1288.51	6.2918e-06	150.08
266	_HPGDFGADAQGAM(ox)_	0	0	YAL04SD	2	1288.51	4.3706e-05	143.15
267	_HPGDFGADAQGAM(ox)_	0	0	YAL04SD	2	1288.51	0.00025925	136.9
268	_HPGDFGADAQGAM(ox)_	0	0	YAL04SD	2	1288.51	6.2918e-06	150.06
269	_HPGDFGADAQGAM(ox)_	0	0	YAL04SD	2	1288.51	0.00025925	136.9
270	_HPGDFGADAQGAM(ox)_	0	0	YAL04SD	2	1288.51	2.1193e-09	169.53
271	_HPGDFGADAQGAM(ox)_	0	0	YAL04SD	2	1288.51	0.0012324	124.12
272	_HPGDFGADAQGAM(ox)_	0	0	YAL04SD	2	1288.51	0.00025925	136.9
273	_HPGDFGADAQGAM(ox)_	0	0	YAL04SD	2	1288.51	2.7162e-06	156.16
274	_HPGDFGADAQGAM(ox)_	0	0	YAL04SD	2	1288.51	0.00025925	136.9
275	_HPGDFGADAQGAM(ox)_	0	0	YAL04SD	2	1288.51	6.2918e-06	150.08
276	_HPGDFGADAQGAM(ox)_	0	0	YAL04SD	2	1288.51	0.00048091	130.53
277	_HPGDFGADAQGAM(ox)_	0	0	YAL04SD	2	1288.51	0.0012324	124.15
278	_HPGDFGADAQGAM(ox)_	0	0	YAL04SD	2	1288.51	0.00048091	130.48
279	_HPGDFGADAQGAM_	0	0	YAL04SD	2	1272.52	0.0010103	125.33
280	_HPGDFGADAQGAM_	0	0	YAL04SD	2	1272.52	1.0885e-05	144.15
281	_HPGDFGADAQGAM_	0	0	YAL04SD	2	1272.52	0.0023085	118.52
282	_HPIKHQGLPQEVLNEN_	0	0	YAL05SD	3	1851.96	0.014903	89.247
283	_HPIKHQGLPQEVLNEN_	0	0	YAL05SD	3	1851.96	0.019053	82.401
284	_HPIKHQGLPQEVLNENLL_	0	0	YAL05SD	3	2078.13	0.0014868	99.935
285	_HPIKHQGLPQEVLNENLL_	0	0	YAL05SD	3	2078.13	0.057721	63.766
286	_HPIKHQGLPQEVLNENLL_	0	0	YAL05SD	3	2078.13	0.050362	66.051
287	_HQGLPQEVL_	0	0	YAL05SD	2	1019.54	0.4578	43.186
288	_HQGLPQEVL_	0	0	YAL05SD	2	1019.54	0.044636	85.669
289	_HQGLPQEVL_	0	0	YAL05SD	2	1019.54	0.79385	12.505
290	_HQGLPQEVL_	0	0	YAL05SD	2	1019.54	0.68102	23.57
291	_HQGLPQEVLNEN_	0	0	YAL05SD	2	1376.67	0.0011333	130.29
292	_HQGLPQEVLNEN_	0	0	YAL05SD	2	1376.67	0.0019395	125.54
293	_HQGLPQEVLNEN_	0	0	YAL05SD	2	1376.67	0.0015677	126.78
294	_HQGLPQEVLNEN_	0	0	YAL05SD	2	1376.67	0.0013331	127.84
295	_HQGLPQEVLNENL_	0	0	YAL05SD	2	1489.75	0.021717	86.053
296	_HQGLPQEVLNENL_	0	0	YAL05SD	2	1489.75	0.018896	89.098
297	_HQGLPQEVLNENL_	0	0	YAL05SD	2	1489.75	0.012081	97.484
298	_HQGLPQEVLNENL_	0	0	YAL05SD	2	1489.75	0.0079401	104.13
299	_HQGLPQEVLNENLL_	0	0	YAL05SD	2	1602.84	7.8982e-08	160.46
300	_HQGLPQEVLNENLL_	0	0	YAL05SD	2	1602.84	1.9152e-06	152.53
301	_HQGLPQEVLNENLL_	0	0	YAL05SD	2	1602.84	7.1354e-15	184.82
302	_HQGLPQEVLNENLL_	0	0	YAL05SD	2	1602.84	2.3224e-07	159.8
303	_HQPHQPLPPTVM(ox)FPPQSV_	0	0	YAL02SD	3	2052.03	0.05641	64.193
304	_HQPHQPLPPTVM(ox)FPPQSV_	0	0	YAL02SD	3	2052.03	0.070028	60.539
305	_HQPHQPLPPTVM(ox)FPPQSV_	0	0	YAL02SD	3	2052.03	0.021382	74.933
306	_HQPHQPLPPTVM(ox)FPPQSV_	0	0	YAL02SD	3	2052.03	0.15209	52.103
307	_HQPHQPLPPTVM(ox)FPPQSV_	0	0	YAL02SD	3	2052.03	0.11611	55.812
308	_HQPHQPLPPTVM(ox)FPPQSV_	0	0	YAL02SD	3	2052.03	0.13727	53.631
309	_HQPHQPLPPTVM(ox)FPPQSV_	0	0	YAL02SD	3	2052.03	0.11074	56.39
310	_HQPHQPLPPTVM(ox)FPPQSVL_	0	0	YAL02SD	3	2165.11	0.54514	26.135
311	_HQPHQPLPPTVM(ox)FPPQSVL_	0	0	YAL02SD	3	2165.11	0.00016138	115.83
312	_HQPHQPLPPTVM(ox)FPPQSVL_	0	0	YAL02SD	3	2165.11	0.031375	68.116
313	_HQPHQPLPPTVM(ox)FPPQSVL_	0	0	YAL02SD	3	2165.11	0.045458	62.838
314	_HQPHQPLPPTVM(ox)FPPQSVL_	0	0	YAL02SD	3	2165.11	0.0037425	85.453
315	_HQPHQPLPPTVM(ox)FPPQSVL_	0	0	YAL02SD	3	2165.11	0.011903	75.397
316	_HQPHQPLPPTVM(ox)FPPQSVL_	0	0	YAL02SD	3	2165.11	0.0050497	81.544
317	_HQPHQPLPPTVM(ox)FPPQSVL_	0	0	YAL02SD	3	2165.11	0.045458	62.838
318	_HQPHQPLPPTVM(ox)FPPQSVL_	0	0	YAL02SD	3	2165.11	0.031375	68.068
319	_HQPHQPLPPTVM(ox)FPPQSVL_	0	0	YAL02SD	3	2165.11	8.0267e-05	121.83
320	_IQKEDVPSE_	0	0	YAL05SD	2	1043.51	0.5539	34.955
321	_IQKEDVPSE_	0	0	YAL05SD	2	1043.51	0.16835	66.291
322	_IQKEDVPSE_	0	0	YAL05SD	2	1043.51	0.674	24.282
323	_IQKEDVPSE_	0	0	YAL05SD	2	1043.51	0.065546	78.485
324	_IQKEDVPSE_	0	0	YAL05SD	2	1043.51	0.029054	91.04
325	_IVSDGNGMNA_	0	0	YAL03SD	1	976.428	0.23475	79.624
326	_IVSDGNGMNA_	0	0	YAL03SD	2	976.428	0.0019638	126.55
327	_IVSDGNGMNA_	0	0	YAL03SD	1	976.428	0.43536	64.947
328	_IVSDGNGMNA_	0	0	YAL03SD	2	976.428	0.00030967	140.74
329	_IVSDGNGM(ox)NA_	0	0	YAL03SD	2	992.423	0.2368	58.467
330	_IVSDGNGM(ox)NA_	0	0	YAL03SD	2	992.423	0.67349	7.2299
331	_IVSDGNGM(ox)NA_	0	0	YAL03SD	2	992.423	0.56608	12.338
332	_IVSDGNGM(ox)NAW_	0	0	YAL03SD	2	1178.5	0.059557	84.311
333	_IVSDGNGM(ox)NAW_	0	0	YAL03SD	2	1178.5	2.543e-20	71.735
334	_IVSDGNGM(ox)NAW_	0	0	YAL03SD	2	1178.5	6.9865e-29	77.313
335	_IVSDGNGM(ox)NAW_	0	0	YAL03SD	2	1178.5	0.00088376	47.859
336	_IVSDGNGM(ox)NAW_	0	0	YAL03SD	2	1178.5	1.0013e-12	60.596
337	_IVSDGNGM(ox)NAW_	0	0	YAL03SD	2	1178.5	0.079471	78.519
338	_IVSDGNGM(ox)NAW_	0	0	YAL03SD	2	1178.5	0.00027923	51.548
339	_IVSDGNGM(ox)NAW_	0	0	YAL03SD	2	1178.5	7.5331e-20	67.853
340	_IVSDGNGM(ox)NAW_	0	0	YAL03SD	2	1178.5	0.079471	78.519
341	_IVSDGNGM(ox)NAW_	0	0	YAL03SD	2	1178.5	0.2329	56.9
342	_IVSDGNGM(ox)NAW_	0	0	YAL03SD	2	1178.5	0.51589	38.226
343	_IVSDGNGMNAW_	0	0	YAL03SD	2	1162.51	0.0009252	138.15
344	_IVSDGNGMNAW_	0	0	YAL03SD	1	1162.51	0.75815	42.333
345	_IVSDGNGM(ox)NAWV_	0	0	YAL03SD	2	1277.57	0.0080491	107.92
346	_IVSDGNGM(ox)NAWV_	0	0	YAL03SD	2	1277.57	0.0029897	122.06
347	_IVSDGNGM(ox)NAWV_	0	0	YAL03SD	2	1277.57	7.9369e-96	109.23
348	_IVSDGNGM(ox)NAWV_	0	0	YAL03SD	2	1277.57	5.0416e-65	96.801
349	_IVSDGNGM(ox)NAWV_	0	0	YAL03SD	2	1277.57	9.9429e-08	54.643
350	_IVSDGNGM(ox)NAWV_	0	0	YAL03SD	2	1277.57	0.0016168	46.236
351	_IVSDGNGM(ox)NAWV_	0	0	YAL03SD	2	1277.57	0.0039985	118.68
352	_IVSDGNGMNAWV_	0	0	YAL03SD	2	1261.58	0.014207	97.311
353	_IVSDGNGM(ox)NAWVAW_	0	0	YAL03SD	2	1534.69	0.0758	68.292
354	_KDDSPDLPK_	0	0	YAL01SD	2	1013.5	0.00022971	128.35
355	_KDDSPDLPK_	0	0	YAL01SD	2	1013.5	0.0011503	124.52
356	_KDDSPDLPK_	0	0	YAL01SD	2	1013.5	0.62201	29.116
357	_KDDSPDLPK_	0	0	YAL01SD	2	1013.5	0.039751	87.353
358	_KEGIHAQQ_	0	0	YAL05SD	2	909.467	0.28584	54.563
359	_KEGIHAQQ_	0	0	YAL05SD	2	909.467	0.0012528	113.96
360	_KELGFQG_	0	0	YAL04SD	1	777.402	0.10964	88.368
361	_KELGFQG_	0	0	YAL04SD	1	777.402	0.025152	106.95
362	_KGHHEAEI_	0	0	YAL04SD	2	919.451	0.02678	94.711
363	_KGHHEAEI_	0	0	YAL04SD	2	919.451	0.32118	51.31
364	_KGHHEAEIKPL_	0	0	YAL04SD	3	1257.68	1.8836e-05	144.57
365	_KGHHEAEIKPL_	0	0	YAL04SD	2	1257.68	0.0015986	133.72
366	_KGHHEAEIKPL_	0	0	YAL04SD	3	1257.68	0.018608	103.56
367	_KGHHEAEIKPL_	0	0	YAL04SD	2	1257.68	4.8099e-05	143.97
368	_KGHHEAEIKPL_	0	0	YAL04SD	3	1257.68	0.14305	66.894
369	_KGHHEAEIKPL_	0	0	YAL04SD	3	1257.68	0.10371	73.859
370	_KGHHEAEIKPLA_	0	0	YAL04SD	3	1328.72	0.032676	85.802
371	_KGHHEAEIKPLA_	0	0	YAL04SD	3	1328.72	0.042265	81.016
372	_KGHHEAEIKPLA_	0	0	YAL04SD	3	1328.72	0.40319	40.292
373	_KIVSDGNGM(ox)N_	0	0	YAL03SD	2	1049.48	0.55449	36.828
374	_KIVSDGNGM(ox)N_	0	0	YAL03SD	2	1049.48	0.08776	75.746
375	_KIVSDGNGM(ox)N_	0	0	YAL03SD	2	1049.48	0.30466	53.78
376	_KIVSDGNGM(ox)N_	0	0	YAL03SD	2	1049.48	0.24336	58.011
377	_KIVSDGNGMN_	0	0	YAL03SD	2	1033.49	0.062776	81.214
378	_KIVSDGNGMN_	0	0	YAL03SD	2	1033.49	0.23195	58.803
379	_KIVSDGNGMN_	0	0	YAL03SD	2	1033.49	0.57998	35.153
380	_KIVSDGNGMN_	0	0	YAL03SD	2	1033.49	0.017539	100.96
381	_KIVSDGNGM(ox)NA_	0	0	YAL03SD	2	1120.52	0.13247	68.786
382	_KIVSDGNGM(ox)NA_	0	0	YAL03SD	2	1120.52	0.81835	18.155
383	_KIVSDGNGM(ox)NA_	0	0	YAL03SD	2	1120.52	0.18863	60.045
384	_KIVSDGNGM(ox)NA_	0	0	YAL03SD	2	1120.52	1.3649e-07	56.274
385	_KIVSDGNGM(ox)NA_	0	0	YAL03SD	2	1120.52	9.1884e-08	57.515
386	_KIVSDGNGM(ox)NA_	0	0	YAL03SD	2	1120.52	0.6795	13.992
387	_KIVSDGNGM(ox)NA_	0	0	YAL03SD	2	1120.52	0.67729	14.379
388	_KIVSDGNGM(ox)NA_	0	0	YAL03SD	2	1120.52	0.78207	21.199
389	_KIVSDGNGM(ox)NA_	0	0	YAL03SD	2	1120.52	0.31431	51.05
390	_KIVSDGNGM(ox)NA_	0	0	YAL03SD	2	1120.52	0.15809	64.265
391	_KIVSDGNGM(ox)NA_	0	0	YAL03SD	2	1120.52	0.18864	60.021
392	_KIVSDGNGM(ox)NA_	0	0	YAL03SD	2	1120.52	0.46704	40.969
393	_KIVSDGNGM(ox)NA_	0	0	YAL03SD	2	1120.52	7.2675e-13	62.323
394	_KIVSDGNGMNA_	0	0	YAL03SD	2	1104.52	0.15582	64.69
395	_KIVSDGNGMNA_	0	0	YAL03SD	2	1104.52	0.25195	55.513
396	_KIVSDGNGMNA_	0	0	YAL03SD	2	1104.52	0.54618	36.525
397	_KIVSDGNGMNA_	0	0	YAL03SD	2	1104.52	0.27161	54.106
398	_KIVSDGNGMNA_	0	0	YAL03SD	2	1104.52	0.056876	85.115
399	_KIVSDGNGM(ox)NAW_	0	0	YAL03SD	2	1306.6	0.0096538	105.14
400	_KIVSDGNGM(ox)NAW_	0	0	YAL03SD	2	1306.6	0.21707	53.428
401	_KIVSDGNGM(ox)NAW_	0	0	YAL03SD	2	1306.6	5.8786e-20	67.649
402	_KIVSDGNGM(ox)NAW_	0	0	YAL03SD	2	1306.6	0.022516	42.692
403	_KIVSDGNGM(ox)NAW_	0	0	YAL03SD	2	1306.6	0.034641	84.864
404	_KIVSDGNGM(ox)NAW_	0	0	YAL03SD	2	1306.6	0.042358	80.945
405	_KIVSDGNGM(ox)NAW_	0	0	YAL03SD	2	1306.6	5.4652e-08	57.088
406	_KIVSDGNGM(ox)NAW_	0	0	YAL03SD	2	1306.6	5.8785e-20	67.649
407	_KIVSDGNGM(ox)NAW_	0	0	YAL03SD	2	1306.6	0.069343	72.997
408	_KIVSDGNGM(ox)NAW_	0	0	YAL03SD	2	1306.6	0.29989	46.935
409	_KIVSDGNGM(ox)NAW_	0	0	YAL03SD	2	1306.6	0.20185	29.466
410	_KIVSDGNGM(ox)NAW_	0	0	YAL03SD	2	1306.6	0.027378	88.508
411	_KIVSDGNGM(ox)NAW_	0	0	YAL03SD	2	1306.6	0.076441	32.257
412	_KIVSDGNGM(ox)NAW_	0	0	YAL03SD	2	1306.6	3.9614e-20	69.627
413	_KIVSDGNGMNAW_	0	0	YAL03SD	2	1290.6	0.0062195	111.27
414	_KIVSDGNGMNAW_	0	0	YAL03SD	2	1290.6	0.0090393	106.22
415	_KIVSDGNGMNAW_	0	0	YAL03SD	2	1290.6	0.038267	83.021
416	_KIVSDGNGMNAW_	0	0	YAL03SD	2	1290.6	0.065388	73.885
417	_KIVSDGNGM(ox)NAWV_	0	0	YAL03SD	2	1405.67	0.020291	87.628
418	_KIVSDGNGM(ox)NAWV_	0	0	YAL03SD	2	1405.67	9.6607e-29	77.174
419	_KIVSDGNGM(ox)NAWV_	0	0	YAL03SD	2	1405.67	7.862e-15	66.784
420	_KIVSDGNGM(ox)NAWV_	0	0	YAL03SD	2	1405.67	0.017381	34.337
421	_KIVSDGNGM(ox)NAWV_	0	0	YAL03SD	2	1405.67	0.31682	22.096
422	_KIVSDGNGM(ox)NAWV_	0	0	YAL03SD	2	1405.67	0.63138	2.7882
423	_KIVSDGNGM(ox)NAWV_	0	0	YAL03SD	2	1405.67	0.023362	84.341
424	_KIVSDGNGM(ox)NAWV_	0	0	YAL03SD	2	1405.67	0.28372	23.031
425	_KIVSDGNGM(ox)NAWV_	0	0	YAL03SD	2	1405.67	2.7299e-20	69.662
426	_KIVSDGNGM(ox)NAWV_	0	0	YAL03SD	2	1405.67	0.0018231	39.297
427	_KIVSDGNGM(ox)NAWV_	0	0	YAL03SD	2	1405.67	0.49389	16.787
428	_KIVSDGNGM(ox)NAWV_	0	0	YAL03SD	2	1405.67	0.062545	69.87
429	_KIVSDGNGM(ox)NAWV_	0	0	YAL03SD	2	1405.67	0.082043	65.335
430	_KIVSDGNGM(ox)NAWV_	0	0	YAL03SD	2	1405.67	0.014763	93.522
431	_KIVSDGNGM(ox)NAWV_	0	0	YAL03SD	2	1405.67	0.054324	71.759
432	_KIVSDGNGMNAWV_	0	0	YAL03SD	2	1389.67	0.014293	94.002
433	_KIVSDGNGMNAWV_	0	0	YAL03SD	2	1389.67	0.016047	92.148
434	_KIVSDGNGMNAWV_	0	0	YAL03SD	2	1389.67	0.016616	91.515
435	_KIVSDGNGM(ox)NAWVAW_	0	0	YAL03SD	2	1662.78	0.1156	61.2
436	_KIVSDGNGM(ox)NAWVAW_	0	0	YAL03SD	2	1662.78	2.6818e-21	71.439
437	_KIVSDGNGM(ox)NAWVAW_	0	0	YAL03SD	2	1662.78	5.9986e-21	68.626
438	_KIVSDGNGM(ox)NAWVAW_	0	0	YAL03SD	2	1662.78	1.3967e-64	94.877
439	_KIVSDGNGM(ox)NAWVAW_	0	0	YAL03SD	2	1662.78	0.06255	70.627
440	_KIVSDGNGM(ox)NAWVAW_	0	0	YAL03SD	2	1662.78	0.057803	71.447
441	_KIVSDGNGM(ox)NAWVAW_	0	0	YAL03SD	2	1662.78	0.1156	61.152
442	_KIVSDGNGM(ox)NAWVAW_	0	0	YAL03SD	2	1662.78	0.023499	79.166
443	_KIVSDGNGMNAWVAW_	0	0	YAL03SD	2	1646.79	0.014505	101.74
444	_KIVSDGNGMNAWVAW_	0	0	YAL03SD	2	1646.79	0.08992	65.715
445	_KIVSDGNGMNAWVAW_	0	0	YAL03SD	2	1646.79	0.022262	88.681
446	_KKGHHEAEIKPLA_	0	0	YAL04SD	3	1456.82	0.01169	98.112
447	_KKGHHEAEIKPLA_	0	0	YAL04SD	3	1456.82	0.08792	63.944
448	_KQTALVEL_	0	0	YAL01SD	2	900.528	0.0015361	110.94
449	_KQTALVEL_	0	0	YAL01SD	2	900.528	0.0239	96.596
450	_KQTALVEL_	0	0	YAL01SD	2	900.528	0.36001	47.736
451	_KQTALVEL_	0	0	YAL01SD	2	900.528	0.24606	58.225
452	_KVPQVSTPTLVEV_	0	0	YAL01SD	2	1395.8	0.043298	74.323
453	_KVPQVSTPTLVEV_	0	0	YAL01SD	2	1395.8	0.025448	82.107
454	_KVPQVSTPTLVEV_	0	0	YAL01SD	2	1395.8	0.010605	99.854
455	_KVPQVSTPTLVEV_	0	0	YAL01SD	2	1395.8	0.020768	87.069
456	_KVPQVSTPTLVEVS_	0	0	YAL01SD	2	1482.83	0.022112	91.729
457	_KVPQVSTPTLVEVS_	0	0	YAL01SD	2	1482.83	0.019988	95.708
458	_KVPQVSTPTLVEVS_	0	0	YAL01SD	2	1482.83	0.024343	84.277
459	_KVPQVSTPTLVEVS_	0	0	YAL01SD	2	1482.83	0.021297	94.247
460	_KVPQVSTPTLVEVS_	0	0	YAL01SD	2	1482.83	0.57979	22.415
461	_LGEYGFQNA_	0	0	YAL01SD	2	997.451	0.019164	95.149
462	_LGEYGFQNA_	0	0	YAL01SD	2	997.451	0.01849	95.914
463	_LGEYGFQNA_	0	0	YAL01SD	2	997.451	0.11728	71.996
464	_LGEYGFQNAL_	0	0	YAL01SD	2	1110.53	0.015229	104.12
465	_LGEYGFQNAL_	0	0	YAL01SD	1	1110.53	0.33452	70.795
466	_LGEYGFQNAL_	0	0	YAL01SD	2	1110.53	0.011757	108.74
467	_LGEYGFQNAL_	0	0	YAL01SD	1	1110.53	0.49216	61.57
468	_LGEYGFQNAL_	0	0	YAL01SD	2	1110.53	0.035343	90.043
469	_LGEYGFQNAL_	0	0	YAL01SD	2	1110.53	0.016944	101.76
470	_LGEYGFQNALI_	0	0	YAL01SD	2	1223.62	0.0092878	116.78
471	_LGEYGFQNALI_	0	0	YAL01SD	2	1223.62	0.0022245	129.56
472	_LGEYGFQNALI_	0	0	YAL01SD	2	1223.62	0.025065	95.047
473	_LGEYGFQNALI_	0	0	YAL01SD	2	1223.62	0.031764	92.42
474	_LGEYGFQNALIV_	0	0	YAL01SD	2	1322.69	0.00080732	134.33
475	_LGEYGFQNALIV_	0	0	YAL01SD	2	1322.69	0.0081855	107.67
476	_LGEYGFQNALIV_	0	0	YAL01SD	2	1322.69	0.0052631	114.48
477	_LGEYGFQNALIV_	0	0	YAL01SD	2	1322.69	0.030071	87.133
478	_LGEYGFQNALIV_	0	0	YAL01SD	2	1322.69	0.74384	17.205
479	_LHSM(ox)KEGIHA_	0	0	YAL05SD	2	1137.56	0.060033	82.097
480	_LHSM(ox)KEGIHA_	0	0	YAL05SD	2	1137.56	0.08046	76.716
481	_LHSM(ox)KEGIHA_	0	0	YAL05SD	2	1137.56	0.41031	46.422
482	_LHSM(ox)KEGIHA_	0	0	YAL05SD	2	1137.56	0.060033	82.097
483	_LHSMKEGIHA_	0	0	YAL05SD	2	1121.57	0.11352	72.431
484	_LHSMKEGIHA_	0	0	YAL05SD	2	1121.57	0.019288	98.606
485	_LHSMKEGIHA_	0	0	YAL05SD	2	1121.57	0.71433	25.897
486	_LHSM(ox)KEGIHAQ_	0	0	YAL05SD	3	1265.62	0.31215	51.204
487	_LHSM(ox)KEGIHAQ_	0	0	YAL05SD	2	1265.62	0.34583	48.794
488	_LHSM(ox)KEGIHAQ_	0	0	YAL05SD	3	1265.62	0.28303	53.313
489	_LHSM(ox)KEGIHAQ_	0	0	YAL05SD	2	1265.62	0.75303	23.634
490	_LHSM(ox)KEGIHAQ_	0	0	YAL05SD	3	1265.62	0.51486	38.284
491	_LHSM(ox)KEGIHAQ_	0	0	YAL05SD	3	1265.62	0.88419	12.656
492	_LHSM(ox)KEGIHAQ_	0	0	YAL05SD	3	1265.62	0.89529	11.7
493	_LHSMKEGIHAQ_	0	0	YAL05SD	3	1249.62	0.024685	95.544
494	_LHSMKEGIHAQ_	0	0	YAL05SD	2	1249.62	0.040548	89.841
495	_LHSMKEGIHAQ_	0	0	YAL05SD	3	1249.62	0.028646	93.326
496	_LHSMKEGIHAQ_	0	0	YAL05SD	3	1249.62	0.65313	30.519
497	_LHSM(ox)KEGIHAQQ_	0	0	YAL05SD	3	1393.68	0.11849	61.942
498	_LHSM(ox)KEGIHAQQ_	0	0	YAL05SD	2	1393.68	0.044046	80.122
499	_LHSM(ox)KEGIHAQQ_	0	0	YAL05SD	2	1393.68	0.10062	65.977
500	_LHSM(ox)KEGIHAQQ_	0	0	YAL05SD	3	1393.68	0.32554	44.886
501	_LHSM(ox)KEGIHAQQ_	0	0	YAL05SD	3	1393.68	0.25881	50.179
502	_LHSM(ox)KEGIHAQQ_	0	0	YAL05SD	3	1393.68	0.71781	19.506
503	_LHSM(ox)KEGIHAQQ_	0	0	YAL05SD	3	1393.68	0.82146	9.0068
504	_LHSM(ox)KEGIHAQQ_	0	0	YAL05SD	3	1393.68	0.56719	30.91
505	_LHSMKEGIHAQQ_	0	0	YAL05SD	3	1377.68	0.014026	97.695
506	_LHSMKEGIHAQQ_	0	0	YAL05SD	2	1377.68	2.5927e-14	178.84
507	_LHSMKEGIHAQQ_	0	0	YAL05SD	3	1377.68	0.039133	82.563
508	_LHSMKEGIHAQQ_	0	0	YAL05SD	2	1377.68	0.11797	62.058
509	_LHSMKEGIHAQQ_	0	0	YAL05SD	3	1377.68	0.8426	2.3928
510	_LHSMKEGIHAQQ_	0	0	YAL05SD	3	1377.68	0.75699	16.041
511	_LHSMKEGIHAQQ_	0	0	YAL05SD	3	1377.68	0.043857	80.192
512	_LKHLVDEPQ_	0	0	YAL01SD	2	1077.58	0.0049366	112.22
513	_LKHLVDEPQ_	0	0	YAL01SD	2	1077.58	0.00016414	132.86
514	_LKHLVDEPQ_	0	0	YAL01SD	2	1077.58	0.71848	19.897
515	_LKHLVDEPQNL_	0	0	YAL01SD	2	1304.71	0.38214	46.171
516	_LKHLVDEPQNL_	0	0	YAL01SD	3	1304.71	0.74557	24.284
517	_LKHLVDEPQNL_	0	0	YAL01SD	2	1304.71	0.051421	86.702
518	_LKHLVDEPQNL_	0	0	YAL01SD	2	1304.71	0.66556	29.821
519	_LKHLVDEPQNLI_	0	0	YAL01SD	3	1417.79	0.27408	48.973
520	_LKHLVDEPQNLI_	0	0	YAL01SD	2	1417.79	0.062717	74.509
521	_LKHLVDEPQNLI_	0	0	YAL01SD	3	1417.79	0.48631	35.561
522	_LKHLVDEPQNLI_	0	0	YAL01SD	2	1417.79	0.021287	91.516
523	_LKHLVDEPQNLI_	0	0	YAL01SD	3	1417.79	0.18142	56.244
524	_LKHLVDEPQNLI_	0	0	YAL01SD	2	1417.79	0.09138	68.051
525	_LKHLVDEPQNLI_	0	0	YAL01SD	3	1417.79	0.33644	44.043
526	_LKHLVDEPQNLI_	0	0	YAL01SD	2	1417.79	0.10014	66.085
527	_LLYQEPVLGPV_	0	0	YAL02SD	2	1226.69	3.327e-09	123.38
528	_LLYQEPVLGPV_	0	0	YAL02SD	2	1226.69	0.00068717	104.45
529	_LLYQEPVLGPV_	0	0	YAL02SD	2	1226.69	1.7385e-05	123.38
530	_LLYQEPVLGPV_	0	0	YAL02SD	2	1226.69	0.0041334	104.45
531	_LLYQEPVLGPV_	0	0	YAL02SD	1	1226.69	0.32209	50.469
532	_LLYQEPVLGPV_	0	0	YAL02SD	2	1226.69	0.25274	41.21
533	_LSHKDDSPDLP_	0	0	YAL01SD	3	1222.58	0.56446	35.498
534	_LSHKDDSPDLP_	0	0	YAL01SD	2	1222.58	0.0093035	116.73
535	_LSHKDDSPDLP_	0	0	YAL01SD	3	1222.58	0.58038	34.605
536	_LSHKDDSPDLP_	0	0	YAL01SD	2	1222.58	0.011791	112.79
537	_LSHKDDSPDLPK_	0	0	YAL01SD	3	1350.68	2.1786e-09	170.05
538	_LSHKDDSPDLPK_	0	0	YAL01SD	2	1350.68	0.002851	122.55
539	_LSHKDDSPDLPK_	0	0	YAL01SD	3	1350.68	9.8586e-07	159.79
540	_LSHKDDSPDLPK_	0	0	YAL01SD	2	1350.68	0.0054744	113.76
541	_LSHKDDSPDLPK_	0	0	YAL01SD	3	1350.68	0.024498	89.953
542	_LSHKDDSPDLPK_	0	0	YAL01SD	3	1350.68	0.00085585	133.75
543	_LVNELTEF_	0	0	YAL01SD	1	963.491	0.23805	58.986
544	_LVNELTEF_	0	0	YAL01SD	2	963.491	7.963e-05	121.45
545	_LVNELTEF_	0	0	YAL01SD	1	963.491	0.37513	46.368
546	_LVNELTEF_	0	0	YAL01SD	2	963.491	1.3818e-09	137.4
547	_LVNELTEF_	0	0	YAL01SD	1	963.491	0.47569	34.338
548	_LVNELTEF_	0	0	YAL01SD	2	963.491	0.00040664	104.74
549	_LVNELTEF_	0	0	YAL01SD	1	963.491	0.3594	47.815
550	_LVNELTEF_	0	0	YAL01SD	2	963.491	7.963e-05	106.23
551	_LVNELTEFA_	0	0	YAL01SD	1	1034.53	0.13873	69.613
552	_LVNELTEFA_	0	0	YAL01SD	2	1034.53	0.0078976	99.638
553	_LVNELTEFA_	0	0	YAL01SD	2	1034.53	0.00023149	116.33
554	_LVNELTEFA_	0	0	YAL01SD	1	1034.53	0.16789	66.342
555	_LVNELTEFA_	0	0	YAL01SD	1	1034.53	0.16961	66.149
556	_LVNELTEFA_	0	0	YAL01SD	2	1034.53	0.0026391	111.47
557	_LVNELTEFA_	0	0	YAL01SD	1	1034.53	0.15992	67.236
558	_LVNELTEFA_	0	0	YAL01SD	2	1034.53	7.6916e-05	131.26
559	_LVVSTQT_	0	0	YAL01SD	1	746.417	0.034405	105.17
560	_LVVSTQT_	0	0	YAL01SD	1	746.417	0.032059	105.62
561	_LVVSTQTA_	0	0	YAL01SD	1	817.455	0.23866	58.93
562	_LVVSTQTA_	0	0	YAL01SD	1	817.455	0.20028	63.217
563	_LVVSTQTA_	0	0	YAL01SD	2	817.455	0.15717	70.033
564	_LVVSTQTA_	0	0	YAL01SD	1	817.455	0.25117	57.754
565	_LVVSTQTA_	0	0	YAL01SD	2	817.455	0.013625	101.36
566	_LVVSTQTAL_	0	0	YAL01SD	2	930.539	9.9918e-05	137.27
567	_LVVSTQTAL_	0	0	YAL01SD	1	930.539	0.68498	36.799
568	_LVVSTQTAL_	0	0	YAL01SD	2	930.539	9.9918e-05	137.27
569	_LVVSTQTAL_	0	0	YAL01SD	1	930.539	0.57489	47.028
570	_LVVSTQTAL_	0	0	YAL01SD	2	930.539	0.00051114	126.59
571	_LVVSTQTAL_	0	0	YAL01SD	1	930.539	0.4279	49.999
572	_LVVSTQTAL_	0	0	YAL01SD	2	930.539	0.0082737	107.56
573	_LVVSTQTAL_	0	0	YAL01SD	1	930.539	0.57489	33.571
574	_LVVSTQTAL_	0	0	YAL01SD	2	930.539	9.9918e-05	137.27
575	_LVVSTQTAL_	0	0	YAL01SD	1	930.539	0.65959	40.943
576	_LVVSTQTALA_	0	0	YAL01SD	2	1001.58	0.05141	84.872
577	_LVVSTQTALA_	0	0	YAL01SD	2	1001.58	0.0054499	119.93
578	_LVVSTQTALA_	0	0	YAL01SD	2	1001.58	0.026675	92.858
579	_LVVSTQTALA_	0	0	YAL01SD	2	1001.58	0.0073908	116.23
580	_LVVSTQTALA_	0	0	YAL01SD	2	1001.58	0.00088907	134.17
581	_LVVSTQTALA_	0	0	YAL01SD	1	1001.58	0.94038	15.227
582	_LVVSTQTALA_	0	0	YAL01SD	2	1001.58	0.068672	79.317
583	_LWDEEKEIVL_	0	0	YPL145C	2	1272.66	1.872e-07	57.282
584	_LYQEPVLGPV_	0	0	YAL02SD	2	1113.61	0.035361	90.038
585	_LYQEPVLGPV_	0	0	YAL02SD	2	1113.61	0.039871	88.586
586	_LYQEPVLGPV_	0	0	YAL02SD	1	1113.61	0.26912	52.85
587	_LYQEPVLGPV_	0	0	YAL02SD	2	1113.61	0.073753	77.681
588	_LYQEPVLGPV_	0	0	YAL02SD	2	1113.61	0.035361	90.038
589	_LYQEPVLGPV_	0	0	YAL02SD	1	1113.61	0.60871	50.236
590	_M(ox)HQPHQPLPPTVM(ox)FPPQSVL_	0	0	YAL02SD	3	2312.14	0.30522	40.512
591	_M(ox)HQPHQPLPPTVM(ox)FPPQSVL_	0	0	YAL02SD	3	2312.14	0.0037492	81.647
592	_M(ox)HQPHQPLPPTVM(ox)FPPQSVL_	0	0	YAL02SD	3	2312.14	0.04928	69.131
593	_M(ox)HQPHQPLPPTVM(ox)FPPQSVL_	0	0	YAL02SD	3	2312.14	0.025807	73.529
594	_MHQPHQPLPPTVM(ox)FPPQSVL_	0	0	YAL02SD	3	2296.15	0.6113	25.604
595	_NTDGSTD_	0	0	YAL03SD	1	708.256	0.12503	83.47
596	_NTDGSTD_	0	0	YAL03SD	1	708.256	0.011971	109.49
597	_NTDGSTD_	0	0	YAL03SD	1	708.256	0.037211	104.65
598	_NTDGSTD_	0	0	YAL03SD	1	708.256	0.37585	35.584
599	_NTDGSTD_	0	0	YAL03SD	1	708.256	0.48114	21.445
600	_NTDGSTD_	0	0	YAL03SD	1	708.256	0.65284	9.3987
601	_NTDGSTDY_	0	0	YAL03SD	1	871.32	0.014402	102.63
602	_NTDGSTDY_	0	0	YAL03SD	1	871.32	0.014402	102.63
603	_NTDGSTDY_	0	0	YAL03SD	1	871.32	0.72964	8.1526
604	_NTDGSTDY_	0	0	YAL03SD	1	871.32	0.075136	82.5
605	_NTDGSTDY_	0	0	YAL03SD	1	871.32	0.055324	87.36
606	_NTDGSTDY_	0	0	YAL03SD	1	871.32	0.12932	72.909
607	_NTDGSTDYGILQ_	0	0	YAL03SD	2	1282.57	0.0052899	114.39
608	_NTDGSTDYGILQ_	0	0	YAL03SD	2	1282.57	0.073721	71.991
609	_NTDGSTDYGILQI_	0	0	YAL03SD	2	1395.65	5.373e-06	151.65
610	_NTDGSTDYGILQI_	0	0	YAL03SD	2	1395.65	5.373e-06	151.63
611	_NTDGSTDYGILQINS_	0	0	YAL03SD	2	1596.73	0.0041591	116.14
612	_NYQEAKDAFLG_	0	0	YAL01SD	2	1254.59	0.024055	96.369
613	_NYQEAKDAFLG_	0	0	YAL01SD	2	1254.59	0.016682	106.03
614	_NYQEAKDAFLGS_	0	0	YAL01SD	2	1341.62	4.2895e-05	143.79
615	_NYQEAKDAFLGS_	0	0	YAL01SD	2	1341.62	0.00081585	134.22
616	_NYQEAKDAFLGS_	0	0	YAL01SD	2	1341.62	0.08929	68.496
617	_NYQEAKDAFLGS_	0	0	YAL01SD	2	1341.62	0.032742	85.769
618	_PKATEEQL_	0	0	YAL01SD	2	914.471	0.093017	78.113
619	_PKATEEQL_	0	0	YAL01SD	2	914.471	0.035662	92.207
620	_PKATEEQL_	0	0	YAL01SD	2	914.471	0.33543	50.022
621	_PKATEEQL_	0	0	YAL01SD	2	914.471	0.0034762	109.6
622	_PKATEEQL_	0	0	YAL01SD	2	914.471	0.17467	66.707
623	_QELAYFYPEL_	0	0	YAL05SD	2	1271.61	0.012428	107.84
624	_QELAYFYPEL_	0	0	YAL05SD	2	1271.61	0.010073	111.09
625	_QEPVLGPV_	0	0	YAL02SD	1	837.46	0.0011612	114.98
626	_QEPVLGPV_	0	0	YAL02SD	2	837.46	0.35969	49.342
627	_QEPVLGPV_	0	0	YAL02SD	1	837.46	0.019728	99.233
628	_QEPVLGPV_	0	0	YAL02SD	1	837.46	0.00089194	117.87
629	_QEPVLGPV_	0	0	YAL02SD	2	837.46	0.5904	23.485
630	_QEPVLGPV_	0	0	YAL02SD	1	837.46	0.0010569	116.11
631	_QGLPQEVLNEN_	0	0	YAL05SD	2	1239.61	1.591e-05	147.07
632	_QGLPQEVLNENL_	0	0	YAL05SD	2	1352.69	1.0456e-05	149.07
633	_QGLPQEVLNENL_	0	0	YAL05SD	2	1352.69	0.0013396	127.76
634	_QGLPQEVLNENLL_	0	0	YAL05SD	2	1465.78	0.00046033	131.08
635	_QGLPQEVLNENLL_	0	0	YAL05SD	2	1465.78	0.0028586	115.63
636	_QGLPQEVLNENLL_	0	0	YAL05SD	2	1465.78	0.0025123	117.46
637	_QGLPQEVLNENLL_	0	0	YAL05SD	2	1465.78	3.8045e-06	154.31
638	_QLDAYPSGA_	0	0	YAL05SD	1	920.424	0.57295	33.304
639	_QLDAYPSGA_	0	0	YAL05SD	2	920.424	0.015693	103.4
640	_QLDAYPSGA_	0	0	YAL05SD	1	920.424	0.019529	94.759
641	_QLDAYPSGA_	0	0	YAL05SD	1	920.424	0.00018811	131.18
642	_QLDAYPSGAW_	0	0	YAL05SD	2	1106.5	1.6695e-15	182.21
643	_QLDAYPSGAW_	0	0	YAL05SD	1	1106.5	0.058728	91.335
644	_QLDAYPSGAW_	0	0	YAL05SD	2	1106.5	4.0829e-23	197.18
645	_QLDAYPSGAW_	0	0	YAL05SD	1	1106.5	0.14858	90.023
646	_QLDAYPSGAW_	0	0	YAL05SD	2	1106.5	3.2998e-16	191.77
647	_QLDAYPSGAW_	0	0	YAL05SD	1	1106.5	0.066632	104.32
648	_QLDAYPSGAW_	0	0	YAL05SD	2	1106.5	1.5406e-06	158.25
649	_QLDAYPSGAW_	0	0	YAL05SD	1	1106.5	0.02755	119.29
650	_QLDAYPSGAW_	0	0	YAL05SD	2	1106.5	0.33397	51.721
651	_QSLTLTDVENL_	0	0	YAL02SD	2	1231.63	0.01215	112.22
652	_QSLTLTDVENL_	0	0	YAL02SD	2	1231.63	0.16196	63.559
653	_QTALVELL_	0	0	YAL01SD	1	885.517	0.14432	83.29
654	_QTALVELL_	0	0	YAL01SD	2	885.517	0.0012525	113.96
655	_QTALVELL_	0	0	YAL01SD	1	885.517	0.12898	84.203
656	_QTALVELL_	0	0	YAL01SD	2	885.517	0.071915	83.314
657	_QTALVELL_	0	0	YAL01SD	1	885.517	0.12898	87.725
658	_QTALVELL_	0	0	YAL01SD	1	885.517	0.14432	83.314
659	_QTPVVVPPFLQPEVM(ox)GVS_	0	0	YAL02SD	2	1939.01	0.069792	60.586
660	_QTPVVVPPFLQPEVM(ox)GVS_	0	0	YAL02SD	2	1939.01	0.0019697	94.301
661	_SALTPDETYVPK_	0	0	YAL01SD	2	1319.66	0.00065423	136.27
662	_SALTPDETYVPK_	0	0	YAL01SD	2	1319.66	0.0012436	128.93
663	_SALTPDETYVPK_	0	0	YAL01SD	2	1319.66	1.0629e-05	148.88
664	_SALTPDETYVPK_	0	0	YAL01SD	2	1319.66	4.554e-09	161.88
665	_SALTPDETYVPK_	0	0	YAL01SD	2	1319.66	0.00044196	138.87
666	_SALTPDETYVPKA_	0	0	YAL01SD	2	1390.7	0.022916	84.769
667	_SALTPDETYVPKA_	0	0	YAL01SD	2	1390.7	0.016201	91.959
668	_SALTPDETYVPKA_	0	0	YAL01SD	2	1390.7	0.12789	58.433
669	_SALTPDETYVPKA_	0	0	YAL01SD	2	1390.7	0.024961	82.604
670	_SHKDDSPDLPK_	0	0	YAL01SD	3	1237.59	1.7996e-05	145.35
671	_SHKDDSPDLPK_	0	0	YAL01SD	2	1237.59	0.020872	100.54
672	_SHKDDSPDLPK_	0	0	YAL01SD	3	1237.59	2.3313e-09	165.91
673	_SHKDDSPDLPK_	0	0	YAL01SD	2	1237.59	0.04181	89.473
674	_SHKDDSPDLPK_	0	0	YAL01SD	3	1237.59	0.0021303	130.26
675	_SHKDDSPDLPK_	0	0	YAL01SD	2	1237.59	0.1576	64.353
676	_SHKDDSPDLPK_	0	0	YAL01SD	3	1237.59	1.7186e-09	168.99
677	_SLHTLFGDEL_	0	0	YAL01SD	2	1130.56	0.012781	107.36
678	_SLHTLFGDEL_	0	0	YAL01SD	2	1130.56	0.00062881	137.14
679	_SLHTLFGDEL_	0	0	YAL01SD	2	1130.56	0.0043628	121.98
680	_SLPQNIPPLTQTPVVVPPFLQPEV_	0	0	YAL02SD	3	2609.45	0.00027854	95.112
681	_SLPQNIPPLTQTPVVVPPFLQPEVM(ox)_	0	0	YAL02SD	3	2756.48	0.063308	78.071
682	_SLPQNIPPLTQTPVVVPPFLQPEVM(ox)GVS_	0	0	YAL02SD	3	2999.6	0.098591	77.324
683	_SLTLTDVENL_	0	0	YAL02SD	2	1103.57	9.6256e-10	166.69
684	_SLTLTDVENL_	0	0	YAL02SD	2	1103.57	9.6256e-10	166.67
685	_SLTLTDVENL_	0	0	YAL02SD	1	1103.57	0.63075	48.493
686	_SLTLTDVENL_	0	0	YAL02SD	2	1103.57	0.0064113	118.07
687	_SLTLTDVENL_	0	0	YAL02SD	2	1103.57	1.6315e-15	182.48
688	_SLTLTDVENLHLPLPL_	0	0	YAL02SD	2	1773.99	0	217.84
689	_SLVYPFPGPIPN_	0	0	YAL02SD	2	1299.69	0.00089893	133.22
690	_SLVYPFPGPIPN_	0	0	YAL02SD	2	1299.69	0.010278	104.07
691	_SLVYPFPGPIPN_	0	0	YAL02SD	2	1299.69	0.045113	79.587
692	_SLVYPFPGPIPN_	0	0	YAL02SD	2	1299.69	0.011463	102.03
693	_SNFNTQATN_	0	0	YAL03SD	2	995.431	0.00023599	127.9
694	_SNFNTQATN_	0	0	YAL03SD	2	995.431	0.00023599	127.9
695	_SSDITASVN_	0	0	YAL03SD	1	892.414	0.60797	30.315
696	_SSDITASVN_	0	0	YAL03SD	1	892.414	0.71813	19.93
697	_SSDITASVN_	0	0	YAL03SD	1	892.414	0.45443	43.449
698	_SSDITASVN_	0	0	YAL03SD	2	892.414	0.12485	72.763
699	_SSDITASVN_	0	0	YAL03SD	1	892.414	0.84994	8.2231
700	_SSDITASVN_	0	0	YAL03SD	1	892.414	0.62787	28.639
701	_SSDITASVN_	0	0	YAL03SD	2	892.414	0.10073	63.937
702	_TDAPSFSDIPNPI_	0	0	YAL05SD	2	1372.65	0.011266	98.793
703	_TDAPSFSDIPNPIGSEN_	0	0	YAL05SD	2	1759.79	3.6969e-18	185.84
704	_TDAPSFSDIPNPIGSEN_	0	0	YAL05SD	2	1759.79	6.6863e-09	146.07
705	_TDAPSFSDIPNPIGSEN_	0	0	YAL05SD	2	1759.79	2.5172e-10	160.27
706	_TDAPSFSDIPNPIGSEN_	0	0	YAL05SD	2	1759.79	2.6212e-19	193.53
707	_TDAPSFSDIPNPIGSEN_	0	0	YAL05SD	2	1759.79	3.9089e-09	152.19
708	_TDAPSFSDIPNPIGSENSE_	0	0	YAL05SD	2	1975.86	5.0002e-14	168.37
709	_TDAPSFSDIPNPIGSENSE_	0	0	YAL05SD	2	1975.86	1.5419e-25	203.86
710	_TDAPSFSDIPNPIGSENSE_	0	0	YAL05SD	2	1975.86	3.5159e-25	195.04
711	_TDAPSFSDIPNPIGSENSE_	0	0	YAL05SD	2	1975.86	2.6576e-26	209.59
712	_TDAPSFSDIPNPIGSENSE_	0	0	YAL05SD	2	1975.86	1.0654e-09	151.58
713	_TDAPSFSDIPNPIGSENSEK_	0	0	YAL05SD	2	2103.96	6.1798e-23	185.63
714	_TDAPSFSDIPNPIGSENSEK_	0	0	YAL05SD	3	2103.96	2.4252e-16	161.81
715	_TDAPSFSDIPNPIGSENSEK_	0	0	YAL05SD	2	2103.96	4.1368e-29	194.84
716	_TDAPSFSDIPNPIGSENSEK_	0	0	YAL05SD	3	2103.96	6.4363e-18	177.04
717	_TDAPSFSDIPNPIGSENSEK_	0	0	YAL05SD	2	2103.96	2.4775e-16	161.48
718	_TDAPSFSDIPNPIGSENSEK_	0	0	YAL05SD	3	2103.96	1.4207e-16	168.28
719	_TDAPSFSDIPNPIGSENSEK_	0	0	YAL05SD	2	2103.96	3.4766e-37	212.2
720	_TDAPSFSDIPNPIGSENSEK_	0	0	YAL05SD	3	2103.96	6.8401e-12	156.12
721	_TDAPSFSDIPNPIGSENSEK_	0	0	YAL05SD	2	2103.96	6.3113e-05	100.23
722	_TDAPSFSDIPNPIGSENSEKTTM(ox)PL_	0	0	YAL05SD	3	2663.23	3.9648e-08	117.86
723	_TDAPSFSDIPNPIGSENSEKTTM(ox)PL_	0	0	YAL05SD	3	2663.23	3.4219e-08	119.2
724	_TDAPSFSDIPNPIGSENSEKTTM(ox)PLW_	0	0	YAL05SD	3	2849.31	5.7889e-08	117.36
725	_TDVENLHLPLPL_	0	0	YAL02SD	2	1359.74	0.0061864	111.41
726	_TDVENLHLPLPL_	0	0	YAL02SD	2	1359.74	0.056717	75.808
727	_TDVENLHLPLPL_	0	0	YAL02SD	2	1359.74	0.0057692	112.77
728	_TDVENLHLPLPL_	0	0	YAL02SD	2	1359.74	0.0094397	105.53
729	_TESQSLTLTDVENL_	0	0	YAL02SD	2	1548.75	0.00017849	132.79
730	_TESQSLTLTDVENL_	0	0	YAL02SD	2	1548.75	1.2059e-14	178.4
731	_TESQSLTLTDVENL_	0	0	YAL02SD	2	1548.75	9.7179e-15	181.45
732	_TKTELEE_	0	0	YPL145C	2	848.413	0.30133	50.681
733	_TKTELEE_	0	0	YPL145C	2	848.413	0.065697	99.135
734	_TKTELEE_	0	0	YPL145C	2	848.413	0.12384	83.827
735	_TLKTEEE_	0	0	YLR135W	2	848.413	0.043197	103.5
736	_TLKTEEE_	0	0	YLR135W	1	848.413	0.38463	37.635
737	_TLKTEEE_	0	0	YLR135W	2	848.413	0.043197	103.5
738	_TLKTEEE_	0	0	YLR135W	1	848.413	0.20042	72.335
739	_TLKTEEE_	0	0	YLR135W	2	848.413	0.54085	17.184
740	_TLKTEEE_	0	0	YLR135W	2	848.413	0.13978	78.752
741	_TLKTEEE_	0	0	YLR135W	2	848.413	0.050962	102.02
742	_TLKTEEE_	0	0	YLR135W	1	848.413	0.23798	65.997
743	_TLKTEEE_	0	0	YLR135W	2	848.413	0.003133	117.33
744	_TLKTEEEK_	0	0	YLR135W	2	976.508	0.0066601	107.57
745	_TLKTEEEK_	0	0	YLR135W	2	976.508	0.053396	87.833
746	_TLKTEEEK_	0	0	YLR135W	2	976.508	0.3074	52.578
747	_TLKTEEEK_	0	0	YLR135W	2	976.508	0.32397	51.053
748	_TLTDVENL_	0	0	YAL02SD	1	903.455	0.00088885	117.92
749	_TLTDVENL_	0	0	YAL02SD	1	903.455	0.00094034	117.37
750	_TLTDVENL_	0	0	YAL02SD	1	903.455	0.057656	86.788
751	_TLTDVENL_	0	0	YAL02SD	1	903.455	0.00088885	117.9
752	_TLTDVENL_	0	0	YAL02SD	2	903.455	0.00056243	100.46
753	_TLTDVENL_	0	0	YAL02SD	1	903.455	0.11145	75.344
754	_TLTDVENL_	0	0	YAL02SD	2	903.455	0.00094034	103.38
755	_TLTDVENLHLPLPL_	0	0	YAL02SD	2	1573.87	0.00010523	137.55
756	_TLTDVENLHLPLPL_	0	0	YAL02SD	2	1573.87	7.6687e-15	184.15
757	_TLTDVENLHLPLPL_	0	0	YAL02SD	2	1573.87	6.5453e-10	171.47
758	_TLTDVENLHLPLPL_	0	0	YAL02SD	2	1573.87	1.1345e-06	155.93
759	_TLTDVENLHLPLPL_	0	0	YAL02SD	2	1573.87	0.46413	29.923
760	_TPDETYVPK_	0	0	YAL01SD	2	1048.51	0.0022241	121.03
761	_TPDETYVPK_	0	0	YAL01SD	2	1048.51	0.0085015	107.25
762	_TPDETYVPK_	0	0	YAL01SD	2	1048.51	0.043679	85.999
763	_TPDETYVPK_	0	0	YAL01SD	2	1048.51	0.0025122	120.09
764	_TPVSEKVT_	0	0	YAL01SD	2	859.465	0.037073	91.885
765	_TPVSEKVT_	0	0	YAL01SD	2	859.465	0.0029524	109.93
766	_TPVSEKVT_	0	0	YAL01SD	2	859.465	0.78779	3.7577
767	_TPVSEKVT_	0	0	YAL01SD	2	859.465	0.48831	32.773
768	_TPVSEKVT_	0	0	YAL01SD	2	859.465	0.025445	95.611
769	_TPVSEKVT_	0	0	YAL01SD	2	859.465	0.0029524	109.93
770	_VAPFPEVFG_	0	0	YAL05SD	1	961.491	0.50313	39.266
771	_VAPFPEVFG_	0	0	YAL05SD	2	961.491	0.0091135	112.77
772	_VAPFPEVFG_	0	0	YAL05SD	1	961.491	0.51495	38.258
773	_VAPFPEVFG_	0	0	YAL05SD	2	961.491	0.022781	97.669
774	_VAPFPEVFG_	0	0	YAL05SD	1	961.491	0.63011	28.448
775	_VAPFPEVFG_	0	0	YAL05SD	2	961.491	0.30076	67.845
776	_VAPFPEVFG_	0	0	YAL05SD	1	961.491	0.41183	46.633
777	_VAPFPEVFG_	0	0	YAL05SD	2	961.491	0.034801	96.906
778	_VAPFPEVFGKE_	0	0	YAL05SD	2	1218.63	0.037749	90.678
779	_VAPFPEVFGKE_	0	0	YAL05SD	2	1218.63	0.024123	96.28
780	_VAPFPEVFGKE_	0	0	YAL05SD	2	1218.63	0.11055	72.628
781	_VAPFPEVFGKE_	0	0	YAL05SD	2	1218.63	0.047462	87.829
782	_VDEPQNLI_	0	0	YAL01SD	2	926.471	0.00602	107.95
783	_VDEPQNLI_	0	0	YAL01SD	1	926.471	0.80789	0
784	_VKEAM(ox)APK_	0	0	YAL02SD	2	888.474	0.6911	11.145
785	_VKEAM(ox)APK_	0	0	YAL02SD	2	888.474	0.79587	3.1467
786	_VKEAM(ox)APK_	0	0	YAL02SD	2	888.474	0.608	19.586
787	_VKEAMAPK_	0	0	YAL02SD	2	872.479	0.062194	85.699
788	_VKEAMAPK_	0	0	YAL02SD	2	872.479	0.044482	90.02
789	_VKEAMAPK_	0	0	YAL02SD	2	872.479	0.3998	44.041
790	_VKEAMAPK_	0	0	YAL02SD	2	872.479	0.2913	54.084
791	_VPQLEIVPN_	0	0	YAL05SD	2	1007.57	0.89122	5.4643
792	_VPQLEIVPN_	0	0	YAL05SD	2	1007.57	0.6723	24.425
793	_VPQLEIVPN_	0	0	YAL05SD	2	1007.57	0.737	18.104
794	_VPQLEIVPN_	0	0	YAL05SD	2	1007.57	0.068049	77.599
795	_VPQLEIVPN_	0	0	YAL05SD	1	1007.57	0.70118	23.124
796	_VPQLEIVPN_	0	0	YAL05SD	2	1007.57	0.28336	55.982
797	_VPQVSTPTLVEV_	0	0	YAL01SD	2	1267.7	0.12105	61.367
798	_VPQVSTPTLVEV_	0	0	YAL01SD	2	1267.7	0.024621	89.868
799	_VPQVSTPTLVEVS_	0	0	YAL01SD	2	1354.73	0.083468	64.98
800	_VPQVSTPTLVEVS_	0	0	YAL01SD	2	1354.73	0.0026966	116.5
801	_VPQVSTPTLVEVS_	0	0	YAL01SD	2	1354.73	0.005933	107.38
802	_VPQVSTPTLVEVS_	0	0	YAL01SD	2	1354.73	0.013874	94.603
803	_VPQVSTPTLVEVS_	0	0	YAL01SD	2	1354.73	0.0013243	123.64
804	_VYPFPGPIPN_	0	0	YAL02SD	2	1099.57	0.072847	77.997
805	_VYPFPGPIPN_	0	0	YAL02SD	2	1099.57	0.033035	90.786
806	_VYPFPGPIPN_	0	0	YAL02SD	2	1099.57	0.0061743	118.52
807	_YKELGFQG_	0	0	YAL04SD	1	940.465	0.15445	82.289
808	_YKELGFQG_	0	0	YAL04SD	2	940.465	0.039853	91.179
809	_YKELGFQG_	0	0	YAL04SD	1	940.465	0.071925	96.401
810	_YKELGFQG_	0	0	YAL04SD	2	940.465	0.011928	104.18
811	_YKELGFQG_	0	0	YAL04SD	1	940.465	0.26791	66.713
812	_YKELGFQG_	0	0	YAL04SD	2	940.465	0.046663	89.533
813	_YKELGFQG_	0	0	YAL04SD	1	940.465	0.20931	75.083
814	_YLGYLEQL_	0	0	YAL05SD	1	997.512	0.17927	82.218
815	_YLGYLEQL_	0	0	YAL05SD	2	997.512	0.079207	81.501
816	_YLGYLEQL_	0	0	YAL05SD	1	997.512	0.17927	82.218
817	_YLGYLEQL_	0	0	YAL05SD	2	997.512	0.079207	81.501
818	_YLGYLEQL_	0	0	YAL05SD	1	997.512	0.17927	82.218
819	_YLGYLEQL_	0	0	YAL05SD	2	997.512	0.15608	69.239
820	_YLGYLEQL_	0	0	YAL05SD	1	997.512	0.17927	82.194
821	_YLGYLEQL_	0	0	YAL05SD	2	997.512	0.12338	73.718
822	_YPVEPFTESQ_	0	0	YAL02SD	2	1195.54	0.033761	90.553
823	_YPVEPFTESQ_	0	0	YAL02SD	2	1195.54	0.021768	95.268
824	_YPVEPFTESQ_	0	0	YAL02SD	2	1195.54	0.016033	102.99
825	_YPVEPFTESQ_	0	0	YAL02SD	1	1195.54	0.9638	15.108
826	_YPVEPFTESQ_	0	0	YAL02SD	2	1195.54	0.016033	103.01
827	_YPVEPFTESQ_	0	0	YAL02SD	1	1195.54	0.67461	45.589

## Sheet: Table S3
Table S3: BSA dimethylation site identified after reductive demethylation reaction on protein level.
Sequence	MH+	Charge	Score	Modification
K.QNCDQFEK*LGEYGFQNALIVR.Y	2558.23	3	28.97	28.031300 Dimethyl (K)
R.ALK*AWSVAR.L	1029.62	2	50.67	28.031300 Dimethyl (K)
R.CASIQK*FGER.A	1224.6	2	32.95	28.031300 Dimethyl (K)
R.CASIQK@FGER.A	1210.59	2	40.18	14.015650 Methyl (K)
R.K*VPQVSTPTLVEVSR.S	1667.97	2	73.4	28.031300 Dimethyl (K)
R.K@VPQVSTPTLVEVSR.S	1653.95	2	61.29	14.015650 Methyl (K)
R.LRCASIQK*FGER.A	1493.79	2	26.42	28.031300 Dimethyl (K)
R.YTRK@VPQVSTPTLVEVSR.S	2074.17	3	32.82	14.015650 Methyl (K)

## Sheet: Table S4
Table S4: BSA dimethylation events identified from reductive demethylation reacted BSA spiked in Hela total lysate background.
Sequence	Modifications	Modified Sequence	PEP	MS/MS Scan Number	Score
FKDIGEEHFK	2 Dimethyl (KR)	_FK(di)DIGEEHFK(di)_	0.11832	3046	106.62
TPVSEKVTK	2 Dimethyl (KR)	_TPVSEK(di)VTK(di)_	0.31976	786	109.71
FKDIGEEHFK	2 Dimethyl (KR),OPA-Nterm	_(op)FK(di)DIGEEHFK(di)_	0.081493	6775	105.86
FKDIGEEHFK	2 Dimethyl (KR),OPA-Nterm	_(op)FK(di)DIGEEHFK(di)_	0.077531	6783	106.29
ICVIHEKTPVSEKVTK	3 Dimethyl (KR),OPA-Nterm	_(op)ICVIHEK(di)TPVSEK(di)VTK(di)_	0.44592	4962	92.856
ICVIHEK	Dimethyl (KR),OPA-Nterm	_(op)ICVIHEK(di)_	0.094806	8354	114.54
ICVIHEK	Dimethyl (KR),OPA-Nterm	_(op)ICVIHEK(di)_	0.094806	7195	114.54

## Sheet: Table S5
Site ID	Type	Amino acid	Localization Probability	Position in Peptide	Methylation Probabilities	Mass error [ppm]	Sequence window	Leading Protein	Position in Leading protein	Leading Protein name	Gene	All proteins	All Positions
1	Mono	K	0.999994	8	KMMDAQYK(1)CYDR	0.78057	FLYVVGRKKMMDAQYKCYDRMQQLPAYQGEG	A4D1G6	54	Calcitonin receptor	CALCR	A4D1G6;P30988-6;P30988-5;P30988-2;P30988	54;54;54;54;72
2	Mono	K	0.799042	7	GIDLLK(0.201)K(0.799)	0.40903	KLVLRIPNRGIDLLKKDKSRKRSYSPDGKES	A8MXP9	589	Matrin-3	MATR3	A8MXP9;P43243;D6REM6;B3KM87;P43243-2	589;589;589;251;301
3	Mono	K	1	8	GGLGLILK(1)R	0.54384	KTPLQVAKGGLGLILKRMVEG__________	B1AJY5	180	26S proteasome non-ATPase regulatory subunit 10	PSMD10	B1AJY5;B1AJY7;O75832	180;188;221
4	Mono	K	0.999868	6	HILFYK(1)MREEQLR	2.3573	LLAELSDVQKHILFYKMREEQLRRWKERETW	B1AVV4	30	SH2 domain-containing protein 4B	SH2D4B	B1AVV4;Q5SQS7-2;Q5SQS7	30;30;30
5	Mono	K	1	7	IFIGTFK(1)	-0.22895	MRCILQDGRIFIGTFKAFDKHMNLILCDCDE	P63162	32	Small nuclear ribonucleoprotein-associated protein N;Small nuclear ribonucleoprotein-associated proteins B and B'	SNRPN;SNRPB	P63162;P14678;B3KVR1;J3QLE5;P14678-2;P14678-3;J3KRY3;S4R3P3	32;32;36;32;32;32;32;32
6	Mono	K	1	7	GYSSLLK(1)R	0.71047	FRDRENYDRGYSSLLKRDFGAKTQNGVYSAA	B4DLW8	444	Probable ATP-dependent RNA helicase DDX5	DDX5	B4DLW8;P17844;J3KTA4	444;523;523
7	Mono	K	1	7	IVDEREK(1)NLDDK(1)	-1.4852	NLTKRWLMKIVDEREKNLDDKAYRNIKELEN	E5RHX9	50	NADH dehydrogenase (ubiquinone) complex I, assembly factor 6	NDUFAF6	E5RHX9;E5RGD6;E5RFN5;B4DW83;Q330K2-2;Q330K2	50;50;69;9;109;161
8	Mono	K	1	12	IVDEREK(1)NLDDK(1)	-1.4852	WLMKIVDEREKNLDDKAYRNIKELENYAENT	E5RHX9	55	NADH dehydrogenase (ubiquinone) complex I, assembly factor 6	NDUFAF6	E5RHX9;E5RGD6;E5RFN5;B4DW83;Q330K2-2;Q330K2	55;55;74;14;114;166
9	Mono	K	0.959286	11	LKGDDLQAIK(0.041)K(0.959)	-0.27557	SKSGKLKGDDLQAIKKELTQIKQKVDSLLEN	G3V576	198	Heterogeneous nuclear ribonucleoproteins C1/C2	HNRNPC	G3V576;G3V4W0;B4DY08;G3V4C1;G3V2Q1;P07910-2;P07910;P07910-3;G3V5V7;G3V2D6	198;185;185;185;198;185;198;118;82;106
10	Mono	K	1	16	MIAGQVLDINLAAEPK(1)	-1.1508	MIAGQVLDINLAAEPKVNRGKAGVKRSAAEM	G3V576	89	Heterogeneous nuclear ribonucleoproteins C1/C2	HNRNPC	G3V576;G3V4W0;B4DY08;G3V4C1;G3V2Q1;P07910-2;P07910;G3V555;G3V575;P07910-4;G3V5X6;G3V3K6;G3V251;B4DSU6	89;89;89;89;89;89;89;89;89;89;89;89;89;89
11	Mono	K	1	12	VFIGNLNTLVVK(1)	-0.215	MNSRVFIGNLNTLVVKKSDVEAIFSKYGKIV	G3V576	29	Heterogeneous nuclear ribonucleoproteins C1/C2;Heterogeneous nuclear ribonucleoprotein C-like 1	HNRNPC;HNRNPCL1	G3V576;G3V4W0;B4DY08;G3V4C1;G3V2Q1;P07910-2;P07910;G3V555;G3V575;P07910-4;G3V5X6;G3V3K6;G3V251;B4DSU6;G3V4M8;P07910-3;O60812;G3V2H6	29;29;29;29;29;29;29;29;29;29;29;29;29;29;29;29;29;29
12	Mono	K	1	11	LVLVGDGGTGK(1)	-0.0026069	QVQFKLVLVGDGGTGKTTFVKRHLTGEFEKK	B5MDF5	23	GTP-binding nuclear protein Ran	RAN	B5MDF5;J3KQE5;P62826;F5H018;H0YFC6	23;41;23;19;38
13	Mono	K	1	12	AYFHLLNQIAPK(1)	0.51551	KDSKAYFHLLNQIAPKGQKEGEPRIDINMSG	B7Z6M1	267	Plastin-3;Plastin-1	PLS3;PLS1	B7Z6M1;P13797;F8W8D8;B4DGB4;H7C4N2;Q14651;C9JAM8	267;312;276;299;33;311;232
14	Mono	K	1	4	RTEK(1)MQTR	2.1457	STNNDPYVAFRRRTEKMQTRKNRKNDEASY_	C9J1X4	146	Enhancer of polycomb homolog;Enhancer of polycomb homolog 1;Enhancer of polycomb homolog 2	EPC2;EPC1	C9J1X4;Q9H2F5-3;Q52LR7;Q9H2F5-2;Q9H2F5	146;167;217;217;217
15	Mono	K	0.998333	10	SGALDVLQMK(0.998)EEDVLK(0.002)	0.10161	_____MSGALDVLQMKEEDVLKFLAAGTHLG	C9J9K3	11	40S ribosomal protein SA	RPSA;RPSAP58	C9J9K3;P08865;A6NE09;C9JQR9	11;11;11;11
16	Mono	K	0.5	16	SGALDVLQMK(0.5)EEDVLK(0.5)	-0.12429	SGALDVLQMKEEDVLKFLAAGTHLGGTNLDF	C9J9K3	17	40S ribosomal protein SA	RPSA;RPSAP58	C9J9K3;P08865;A6NE09;C9JQR9	17;17;17;17
17	Mono	K	1	11	YVDIAIPCNNK(1)	0.78644	DSPLRYVDIAIPCNNKGAHSVGLMWWMLARE	C9J9K3	166	40S ribosomal protein SA	RPSA;RPSAP58	C9J9K3;P08865;A6NE09	166;166;166
18	Mono	K	1	8	IPILVINK(1)	-1.5316	SHQQYFYKIPILVINKVLPMVSITLLALVYL	C9JL51	116	STEAP family member 1B;Metalloreductase STEAP1	STEAP1B;STEAP1	C9JL51;C9JE84;Q6NZ63;Q9UHE8;Q6NZ63-2	116;116;97;116;116
19	Mono	K	0.5	8	ADLIAYLK(0.5)K(0.5)	-0.49306	GIKKKEERADLIAYLKK______________	C9JFR7	100	Cytochrome c	CYCS	C9JFR7;P99999	100;100
20	Mono	K	0.5	9	ADLIAYLK(0.5)K(0.5)	-0.49306	IKKKEERADLIAYLKK_______________	C9JFR7	101	Cytochrome c	CYCS	C9JFR7;P99999	101;101
21	Mono	K	0.999842	3	MSK(1)LRMVLLEDSGSADFR	-0.65885	_____________MSKLRMVLLEDSGSADFR	C9JHR8	3	Scavenger receptor cysteine-rich type 1 protein M130;Soluble CD163	CD163	C9JHR8;Q86VB7-3;Q86VB7-4;Q86VB7;Q86VB7-2	3;3;3;3;3
22	Mono	K	1	8	PMSLTGMK(1)GEDLANINR	-0.93358	SEQLFGAKPMSLTGMKGEDLANINRWVKEAT	P28800	198	Alpha-2-antiplasmin	SERPINF2	P28800	198
23	Mono	K	1	3	MDK(1)VCAVFGGSR	-2.374	_____________MDKVCAVFGGSRGIGRAV	D6RAV8	3	Carbonyl reductase family member 4	CBR4	D6RAV8;D6RJF4;D6RGF2;Q8N4T8-2;Q8N4T8	3;3;3;3;3
24	Mono	K	0.5	9	NELPDGLNK(0.5)K(0.5)R	0.7719	GDFESKKNELPDGLNKKRLQILLKGYGEYPT	E5RHC6	80	TBC1 domain family member 31	TBC1D31	E5RHC6;E5RI94;E7ESI5;E7EWW7;E7ERK7;Q96DN5-3;Q96DN5-2;Q96DN5	80;45;307;307;307;412;412;412
25	Mono	K	0.5	10	NELPDGLNK(0.5)K(0.5)R	0.7719	DFESKKNELPDGLNKKRLQILLKGYGEYPTK	E5RHC6	81	TBC1 domain family member 31	TBC1D31	E5RHC6;E5RI94;E7ESI5;E7EWW7;E7ERK7;Q96DN5-3;Q96DN5-2;Q96DN5	81;46;308;308;308;413;413;413
26	Mono	K	0.999852	1	K(1)SEIEYYAMLAK	0.21016	KAKLVILANNCPALRKSEIEYYAMLAKTGVH	E5RI99	57	60S ribosomal protein L30	RPL30	E5RI99;P62888	57;57
27	Mono	K	0.880166	12	VAYVSFGPH(0.12)AGK(0.88)	0.094896	EVGRVAYVSFGPHAGKLVAIVDVIDQNRALV	E7EPB3	23	60S ribosomal protein L14	RPL14	E7EPB3;P50914	23;23
28	Mono	K	1	9	GIYAYGFEK(1)PSAIQQR	1.2586	LKESLLRGIYAYGFEKPSAIQQRAIIPCIKG;LREDLLRGIYAYGFEKPSAIQQRAIKQIIKG;LSESLLRGIYAYGFEKPSAIQQRAILPCIKG	P60842	54	Eukaryotic initiation factor 4A-II;Eukaryotic initiation factor 4A-III;Eukaryotic initiation factor 4A-III, N-terminally processed;Eukaryotic initiation factor 4A-I	EIF4A2;EIF4A3;EIF4A1	E7EQG2;Q14240;Q14240-2;J3KSN7;E7EMV8;E9PBH4;F8WE11;P38919;I3L3H2;P60842;J3KT12;P60842-2;J3KTB5;J3QS69;J3QR64;J3QL43;J3QLN6;J3QKZ9;J3KS25;B4E102;J3KT04;J3KS93;J3QQP0	55;55;56;38;55;55;56;60;60;54;54;54;38;54;65;54;18;18;52;38;55;38;54
29	Mono	K	1	14	GCALQCAILSPAFK(1)	0.78628	ARGCALQCAILSPAFKVREFSITDLVPYSIT;ARGCALQCAILSPAFKVREFSVTDAVPFPIS;TRGCALQCAILSPAFKVREFSITDVVPYPIS	P34932	388	Heat shock 70 kDa protein 4L;Heat shock 70 kDa protein 4;Heat shock protein 105 kDa	HSPA4L;HSPA4;HSPH1	E9PDE8;E7ES43;O95757;D6RJ96;P34932;Q92598-2;Q92598-3;Q92598;Q92598-4;B4DY72	362;419;388;347;388;388;347;388;390;207
30	Mono	K	0.992386	12	KQMVIDVLH(0.008)PGK(0.992)	0.039379	LLQRKQMVIDVLHPGKATVPKTEIREKLAKM	E7ETK0	32	40S ribosomal protein S24	RPS24	E7ETK0;P62847-2;P62847-3;P62847;P62847-4	32;32;32;32;32
31	Mono	K	1	3	ASK(1)EMFEDTVEER	-0.70036	____________MASKEMFEDTVEERVINEE	E9PC52	4	Histone-binding protein RBBP7	RBBP7	E9PC52;Q16576	4;4
32	Mono	K	0.996353	5	INPEK(0.996)LIDVQK(0.004)	0.0044584	LQKKVPVKEIKINPEKLIDVQKKLESILAQD	E9PIF2	446	Probable ATP-dependent RNA helicase DDX10	DDX10	E9PIF2;Q13206	446;446
33	Mono	K	1	10	FVNVVPTFGK(1)	-0.54387	MQYNRRFVNVVPTFGKKKGPNANS_______	E9PR30	90	40S ribosomal protein S30	FAU	E9PR30;P62861	90;51
34	Mono	K	0.999828	8	GHVHYLIK(1)	-0.4689	LNHSVDKKGHVHYLIKWRDLPYDQASWESED	F5GWX5	636	Chromodomain-helicase-DNA-binding protein 4	CHD4	F5GWX5;Q14839;Q14839-2	636;643;643
35	Mono	K	0.435711	4	PQIK(0.436)MTK(0.436)K(0.129)	-2.5182	KRESLTLIVEGKPQIKMTKKTDPSGLSKTII	H7C543	180	CD166 antigen	ALCAM	H7C543;F5GXJ9;Q13740-4;Q13740-2;Q13740	180;368;141;419;419
36	Mono	K	0.435711	7	PQIK(0.436)MTK(0.436)K(0.129)	-2.5182	SLTLIVEGKPQIKMTKKTDPSGLSKTIICHV	H7C543	183	CD166 antigen	ALCAM	H7C543;F5GXJ9;Q13740-4;Q13740-2;Q13740	183;371;144;422;422
37	Mono	K	0.999947	10	RVHPVSTMVK(1)	0.6549	ILKNLRRVHPVSTMVKGLYGIKEELFLSIPC	F5H245	264	L-lactate dehydrogenase;L-lactate dehydrogenase C chain	LDHC	F5H245;P07864	264;278
38	Mono	K	1	16	YVVVTGITPTPLGEGK(1)	0.28423	YVVVTGITPTPLGEGKSTTTIGLVQALGAHL	F5H2F4	442	C-1-tetrahydrofolate synthase, cytoplasmic;Methylenetetrahydrofolate dehydrogenase;Methenyltetrahydrofolate cyclohydrolase;Formyltetrahydrofolate synthetase;C-1-tetrahydrofolate synthase, cytoplasmic, N-terminally processed	MTHFD1	F5H2F4;P11586	442;386
39	Mono	K	1	1	K(1)EATLH(1)DR	0.41371	HHSAFGCPYSDMNLKKEATLHDRLREQTQAN	F5H508	226	Lethal(3)malignant brain tumor-like protein 4	L3MBTL4	F5H508;F8W9S8;Q8NA19-2;Q8NA19	226;413;413;413
40	Mono	K	0.99998	5	VEVAK(1)MIQEVK	1.3331	VNGRSIKGKTKVEVAKMIQEVKGEVTIHYNK	F6V3V1	88	PRKCA-binding protein	PICK1	F6V3V1;F6VY12;F6V107;Q9NRD5-2;Q9NRD5	88;88;88;88;88
41	Mono	K	1	5	ELQEK(1)RR	-0.79575	KEHQAKQNERKELQEKRRREAITAATCLTEA	F8W036	50	Biogenesis of lysosome-related organelles complex 1 subunit 1	BLOC1S1	F8W036;F8VP73;P78537-2;P78537	50;50;22;50
42	Mono	K	0.484931	10	TADGIVSH(0.03)LK(0.485)K(0.485)	-0.78248	AYDGPRTADGIVSHLKKQAGPASVPLRTEEE	G5EA52	109	Protein disulfide-isomerase A3	PDIA3	G5EA52;P30101	109;129
43	Mono	K	0.484931	11	TADGIVSH(0.03)LK(0.485)K(0.485)	-0.78248	YDGPRTADGIVSHLKKQAGPASVPLRTEEEF	G5EA52	110	Protein disulfide-isomerase A3	PDIA3	G5EA52;P30101	110;130
44	Mono	K	1	6	INDCYK(1)R(1)SLER	0.51547	TNSRETFLGRINDCYKRSLERKLPPSCMIGG	H3BUZ5	185	Pseudopodium-enriched atypical kinase 1	PEAK1	H3BUZ5;H0YN99;Q9H792	185;185;185
45	Mono	K	0.999959	3	QVK(1)DFTMKDIEEK	-1.046	KPPSRLKKLKIKKQVKDFTMKDIEEKMEAAE	H3BMF7	154	Stathmin domain-containing protein 1	STMND1	H3BMF7;H3BQB6	154;162
46	Mono	K	0.5	1	K(0.5)MEK(0.5)TLQVVETLR	2.0518	PTISGHPDSKKHSLKKMEKTLQVVETLRLVE	H7C3K1	88	Uncharacterized protein C7orf61	C7orf61	H7C3K1;Q8IZ16	88;46
47	Mono	K	0.5	4	K(0.5)MEK(0.5)TLQVVETLR	2.0518	SGHPDSKKHSLKKMEKTLQVVETLRLVELPK	H7C3K1	91	Uncharacterized protein C7orf61	C7orf61	H7C3K1;Q8IZ16	91;49
48	Mono	K	1	12	VHLVGIDIFTGK(1)	0.60235	GHAKVHLVGIDIFTGKKYEDICPSTHNMDVP	I3L397	67	Eukaryotic translation initiation factor 5A-1;Eukaryotic translation initiation factor 5A-1-like;Eukaryotic translation initiation factor 5A-2	EIF5A;EIF5AL1;EIF5A2	I3L397;I3L504;P63241;Q6IS14;P63241-2;F8WCJ1;C9J7B5;C9J4W5;Q9GZV4	67;67;67;67;97;67;67;48;67
49	Mono	K	1	10	MLR(1)DTLYYMK(1)	2.1333	YLTMFKMLRDTLYYMKDLPTSFVKEIHDFVL	J3KN10	389	Phosphatidylinositol 4-kinase alpha	PI4KA	J3KN10;P42356	389;331
50	Mono	K	1	8	ALQASALK(1)	1.0252	ALTFSYGRALQASALKAWGGKKENLKAAQEE	J3KPS3	316	Fructose-bisphosphate aldolase A	ALDOA	J3KPS3;P04075;H3BQN4;P04075-2;H3BR68	316;312;312;366;78
51	Mono	K	0.999981	9	YLKDVTLQK(1)	0.40087	HIRKATKYLKDVTLQKQCVPFRRYNGGVGRC	J3QS96	55	60S ribosomal protein L17	RPL17	J3QS96;J3QQT2;J3KRX5;P18621;P18621-3;J3KRB3;J3QLC8;P18621-2;J3KSJ0	55;55;55;55;55;55;45;17;55
52	Mono	K	1	6	TVILYK(1)R(0.979)FGR(0.021)	-0.54298	DQFLVTDSGRTVILYKRFGRTRWFTPVIPEL	J3QLQ6	47		NOL11	J3QLQ6	47
53	Mono	K	1	13	ILTFDQLALDSPK(1)	0.24032	GGKILTFDQLALDSPKGCGTVLLSGPRKGRE	J3QQ67	134	60S ribosomal protein L18	RPL18	J3QQ67;Q07020;G3V203;H0YHA7;Q07020-2;F8VUA6	134;132;132;111;103;80
54	Mono	K	0.996132	9	AIMH(0.002)SK(0.002)NGK(0.996)	1.6664	VVEFIKRAIMHSKNGKFLYFLRSRVPGLPPT	J9JID8	452	Suppressor of cytokine signaling 7	SOCS7	J9JID8;O14512-2;O14512	452;236;486
55	Mono	K	0.998645	11	DHDKPH(0.001)QQSDK(0.999)	1.4971	SYRSRDHDKPHQQSDKKGKVICKYFVEGRCT	M0QY97	81	Zinc finger CCCH domain-containing protein 4	ZC3H4	M0QY97;Q9UPT8	81;390
56	Mono	K	1	15	TIAECLADELINAAK(1)	1.5889	KTIAECLADELINAAKGSSNSYAIKKKDELE	M0R0F0	182	40S ribosomal protein S5;40S ribosomal protein S5, N-terminally processed	RPS5	M0R0F0;M0R0R2;P46782;M0QZN2	182;203;182;112
57	Mono	K	0.5	3	TDK(0.5)K(0.5)MDGGSGR	1.4024	PMEEVSGQGLGSRTDKKMDGGSGRELASAPE	M0R3B1	71	Usher syndrome type-1C protein-binding protein 1	USHBP1	M0R3B1;Q8N8Y1;Q8N6Y0	71;71;71
58	Mono	K	0.5	4	TDK(0.5)K(0.5)MDGGSGR	1.4024	MEEVSGQGLGSRTDKKMDGGSGRELASAPEV	M0R3B1	72	Usher syndrome type-1C protein-binding protein 1	USHBP1	M0R3B1;Q8N8Y1;Q8N6Y0	72;72;72
59	Mono	K	1	11	ALLEVVQSGGK(1)	1.2189	KLVIKALLEVVQSGGKNIELAVMRRDQSLKI	O14818	204	Proteasome subunit alpha type-7;Proteasome subunit alpha type-7-like	PSMA7;PSMA8	O14818;O14818-2;Q8TAA3-2;Q8TAA3-5;Q8TAA3	204;134;168;206;212
60	Mono	K	0.965005	8	YHQIGSGK(0.965)CEIK(0.035)	-0.56804	VKKLLESRYHQIGSGKCEIKVAQPKEVYRQQ	O14979-3	183	Heterogeneous nuclear ribonucleoprotein D-like	HNRNPDL	O14979;O14979-3;O14979-2	302;183;183
61	Mono	K	1	7	AFANLRK(1)	-1.8169	________MAFANLRKVLISDSLDPCCRKIL	O43175	8	D-3-phosphoglycerate dehydrogenase	PHGDH	O43175	8
62	Mono	K	1	11	AAAAELSLLEK(1)	0.24207	____MAAAAELSLLEKSLGLSKGNKYSAQGE	O43324	12	Eukaryotic translation elongation factor 1 epsilon-1	EEF1E1;EEF1E1-BLOC1S5	O43324;D6RBD7;C9J1V9;O43324-2	12;12;12;12
63	Mono	K	1	10	GYAFITFCGK(1)	1.4288	LSGQNRGYAFITFCGKEAAQEAVKLCDSYEI	O43390	216	Heterogeneous nuclear ribonucleoprotein R	HNRNPR	O43390;O43390-2;O43390-4;O43390-3;B4DT28	216;216;115;178;77
64	Mono	K	0.989723	4	SH(1)LK(0.99)DH(0.01)ER	0.73316	ACHMCDKAFKHKSHLKDHERRHRGEKPFVCG	O43829	377	Zinc finger and BTB domain-containing protein 14	ZBTB14	O43829	377
65	Mono	K	1	4	LLTK(1)SQREAR	-0.93222	KERKERLKKEGKLLTKSQREARARAEATLKL	O60841	410	Eukaryotic translation initiation factor 5B	EIF5B	O60841	410
66	Mono	K	0.999996	10	RVHPVSTMIK(1)	-0.10668	IMKNLRRVHPVSTMIKGLYGIKDDVFLSVPC	P00338	278	L-lactate dehydrogenase A chain	LDHA	P00338;P00338-3;P00338-4	278;307;220
67	Mono	K	0.58435	7	AGGFLMK(0.584)K(0.416)	0.22018	MVGVNLPQKAGGFLMKKELNYFAKALESPER	P00558	191	Phosphoglycerate kinase 1	PGK1	P00558;B7Z7A9	191;163
68	Mono	K	1	15	GALQNIIPASTGAAK(1)	0.50534	RGALQNIIPASTGAAKAVGKVIPELNGKLTG	P04406	215	Glyceraldehyde-3-phosphate dehydrogenase	GAPDH	P04406;P04406-2;E7EUT5	215;173;140
69	Mono	K	1	17	IISNASCTTNCLAPLAK(1)	-0.40704	ISNASCTTNCLAPLAKVIHDNFGIVEGLMTT	P04406	162	Glyceraldehyde-3-phosphate dehydrogenase	GAPDH	P04406;P04406-2;E7EUT5	162;120;87
70	Mono	K	0.999777	3	LEK(1)PAKYDDIK	3.8488	PTANVSVVDLTCRLEKPAKYDDIKKVVKQAS	P04406	251	Glyceraldehyde-3-phosphate dehydrogenase	GAPDH	P04406;P04406-2;E7EUT5	251;209;176
71	Mono	K	0.998008	11	VVDLMAH(0.002)MASK(0.998)E	-1.0408	GYSNRVVDLMAHMASKE______________	P04406	334	Glyceraldehyde-3-phosphate dehydrogenase	GAPDH	P04406;P04406-2;E7EUT5	334;292;259
72	Mono	K	0.975522	10	LLLQVQH(0.024)ASK(0.976)	-0.69789	PIERVKLLLQVQHASKQIAADKQYKGIVDCI;PIERVKLLLQVQHASKQITADKQYKGIIDCV	P05141	43	ADP/ATP translocase 2;ADP/ATP translocase 2, N-terminally processed;ADP/ATP translocase 3;ADP/ATP translocase 3, N-terminally processed	SLC25A5;SLC25A6	P05141;P12236;I7HJJ0	43;43;43
73	Mono	K	1	12	NIEDVIAQGIGK(1)	1.8657	LNGKNIEDVIAQGIGKLASVPAGGAVAVSAA	P05387	61	60S acidic ribosomal protein P2	RPLP2	P05387;H0YDD8	61;38
74	Mono	K	1	19	YVASYLLAALGGNSSPSAK(1)	0.98754	SYLLAALGGNSSPSAKDIKKILDSVGIEADD	P05387	21	60S acidic ribosomal protein P2	RPLP2	P05387	21
75	Mono	K	1	7	AVVLMGK(1)	-0.68018	QIRMSLRGKAVVLMGKNTMMRKAIRGHLENN	P05388	57	60S acidic ribosomal protein P0	RPLP0	P05388;F8VU65;F8VWS0;Q3B7A4;F8VPE8;G3V210;F8VQY6;F8VRK7;F8VW21;F8VWV4;F8VS58;F8VZS0	57;57;57;57;43;57;57;57;37;43;57;57
76	Mono	K	1	19	DATNVGDEGGFAPNILENK(1)	1.6068	NVGDEGGFAPNILENKEGLELLKTAIGKAGY	P06733	221	Alpha-enolase	ENO1	P06733;P06733-2	221;128
77	Mono	K	0.963229	10	IGAEVYH(0.037)NLK(0.963)	1.341	FREAMRIGAEVYHNLKNVIKEKYGKDATNVG	P06733	193	Alpha-enolase;Enolase	ENO1	P06733;P06733-2;K7EM90	193;100;193
78	Mono	K	1	8	NFRNPLAK(1)	0.57103	SKAKFAGRNFRNPLAK_______________	P06733	434	Alpha-enolase	ENO1	P06733;P06733-2	434;341
79	Mono	K	1	8	SCNCLLLK(1)	-0.64684	IAKAVNEKSCNCLLLKVNQIGSVTESLQACK	P06733	343	Alpha-enolase	ENO1	P06733;P06733-2	343;250
80	Mono	K	0.999999	9	SGKYDLDFK(1)	-0.17766	AASEFFRSGKYDLDFKSPDDPSRYISPDQLA	P06733	262	Alpha-enolase	ENO1	P06733;P06733-2	262;169
81	Mono	K	1	15	VNQIGSVTESLQACK(1)	0.4584	KVNQIGSVTESLQACKLAQANGWGVMVSHRS	P06733	358	Alpha-enolase	ENO1	P06733;P06733-2	358;265
82	Mono	K	1	12	YISPDQLADLYK(1)	1.2654	DPSRYISPDQLADLYKSFIKDYPVVSIEDPF	P06733	281	Alpha-enolase	ENO1	P06733;P06733-2	281;188
83	Mono	K	0.990052	3	ADK(0.99)DYH(0.008)FK(0.002)VDNDENEHQLSLR	-0.65632	LRPQNYLFGCELKADKDYHFKVDNDENEHQL	P06748-2	27	Nucleophosmin	NPM1	P06748-2;P06748;P06748-3	27;27;27
84	Mono	K	1	10	AGITTIEAVK(1)R	-0.48105	_____MAGITTIEAVKRKIQVLQQQADDAEE	P06753-2	11	Tropomyosin alpha-3 chain	TPM3	P06753-2;Q5VU59;P06753-5;P06753-3;P06753-6;P06753-4;Q5VU61;D6R904;D6RFM2	11;11;11;11;11;11;11;11;11
85	Mono	K	1	10	KESYSIYVYK(1)	-1.587	KRKRSRKESYSIYVYKVLKQVHPDTGISSKA	Q16778	44	Histone H2B type 1-J;Histone H2B type 2-E;Histone H2B type 1-B;Histone H2B type 1-O;Putative histone H2B type 2-D;Putative histone H2B type 2-C	HIST1H2BJ;HIST2H2BE;HIST1H2BB;HIST1H2BO;HIST2H2BD;HIST2H2BC	P06899;Q16778;P33778;P23527;Q6DRA6;Q6DN03	44;44;44;44;44;44
86	Mono	K	1	1	K(1)ESYSIYVYK	-0.10207	TKAQKKDGKKRKRSRKESYSIYVYKVLKQVH	Q16778	35	Histone H2B type 1-J;Histone H2B type 2-E;Histone H2B type 1-B;Histone H2B type 1-O;Putative histone H2B type 2-D;Putative histone H2B type 2-C	HIST1H2BJ;HIST2H2BE;HIST1H2BB;HIST1H2BO;HIST2H2BD;HIST2H2BC	P06899;Q16778;P33778;P23527;Q6DRA6;Q6DN03	35;35;35;35;35;35
87	Mono	K	1	14	IVADKDYSVTANSK(1)	-0.6048	PKIVADKDYSVTANSKIVVVTAGVRQQEGES	P07195	91	L-lactate dehydrogenase B chain;L-lactate dehydrogenase	LDHB	P07195;A8MW50;C9J7H8;F5H793	91;91;91;91
88	Mono	K	1	16	LIAPVAEEEATVPNNK(1)	1.2905	LIAPVAEEEATVPNNKITVVGVGQVGMACAI	P07195	23	L-lactate dehydrogenase B chain;L-lactate dehydrogenase	LDHB	P07195;A8MW50;C9J7H8;F5H793	23;23;23;23
89	Mono	K	0.999984	2	LK(1)DDEVAQLKK	0.055452	ILNARGLTSVINQKLKDDEVAQLKKSADTLW	P07195	310	L-lactate dehydrogenase B chain	LDHB	P07195	310
90	Mono	K	1	12	EVDEQMLNVQNK(1)	-0.22245	MSMKEVDEQMLNVQNKNSSYFVEWIPNNVKT	P68371	336	Tubulin beta chain;Tubulin beta-4B chain;Tubulin beta-2B chain;Tubulin beta-2A chain	TUBB;TUBB4B;TUBB2B;TUBB2A	Q5JP53;P07437;Q5ST81;E9PBJ4;P68371;Q9BVA1;Q13885	318;336;264;135;336;336;336
91	Mono	K	1	12	ISVYYNEATGGK(1)	2.12	QLDRISVYYNEATGGKYVPRAILVDLEPGTM	Q5JP53	40	Tubulin beta chain	TUBB	Q5JP53;P07437;E9PBJ4	40;58;58
92	Mono	K	1	14	STGGAPTFNVTVTK(1)	1.3424	TKSTGGAPTFNVTVTKTDKTLVLLMGKEGVH	P07737	105	Profilin-1	PFN1	P07737;K7EJ44	105;69
93	Mono	K	1	11	TDKTLVLLMGK(1)	-0.679	VTVTKTDKTLVLLMGKEGVHGGLINKKCYEM	P07737	116	Profilin-1	PFN1	P07737;K7EJ44	116;80
94	Mono	K	1	12	ADLINNLGTIAK(1)	-0.42347	GMTKADLINNLGTIAKFQDQTEYLEEMQVKE;GMTKADLINNLGTIAKSGTKAFMEALQAGAD	P08238	107	Heat shock protein HSP 90-alpha;Putative heat shock protein HSP 90-alpha A2;Heat shock protein HSP 90-beta;Putative heat shock protein HSP 90-beta 2	HSP90AA1;HSP90AA2;HSP90AB1;HSP90AB2P	P07900;P07900-2;Q14568;P08238;Q58FF8	112;234;112;107;107
95	Mono	K	1	10	HIYYITGETK(1)	-1.2405	MKENQKHIYYITGETKDQVANSAFVERLRKH	P07900	499	Heat shock protein HSP 90-alpha;Putative heat shock protein HSP 90-alpha A5	HSP90AA1;HSP90AA5P	P07900;P07900-2;Q86U12;Q58FG0	499;621;320;184
96	Mono	K	1	9	YIDQEELNK(1)	-0.27653	KKKIKEKYIDQEELNKTKPIWTRNPDDITNE;TKKIKEKYIDQEELNKTKPIWTRNPDDITQE;TKKIKEKYIDQEELNKTKPIWTRNTEDITQE	P08238	284	Heat shock protein HSP 90-alpha;Putative heat shock protein HSP 90-alpha A2;Heat shock protein HSP 90-beta;Putative heat shock protein HSP 90-beta 2	HSP90AA1;HSP90AA2;HSP90AB1;HSP90AB2P	P07900;P07900-2;Q86U12;Q14568;P08238;Q58FF8	292;414;113;291;284;206
97	Mono	K	0.841528	8	DLEK(0.158)MMVK(0.842)R	-0.25323	PVFADISKDLEKMMVKRRDYLDLAASTPSDS	P07949-2	1011	Proto-oncogene tyrosine-protein kinase receptor Ret;Soluble RET kinase fragment;Extracellular cell-membrane anchored RET cadherin 120 kDa fragment	RET	P07949-2;P07949	1011;1011
98	Mono	K	1	10	LVNHFVEEFK(1)R	-0.83582	EDFDNRLVNHFVEEFKRKHKKDISQNKRAVR	P08107	246	Heat shock 70 kDa protein 1A/1B	HSPA1A	P08107;P08107-2;E7EP94;V9GZ37	246;191;155;81
99	Mono	K	1	10	RAPFDLFENK(1)	0.62252	LLFIPRRAPFDLFENKKKKNNIKLYVRRVFI	P08238	347	Heat shock protein HSP 90-beta;Putative heat shock protein HSP 90-beta-3	HSP90AB1;HSP90AB3P	P08238;Q58FF7	347;289
100	Mono	K	0.763185	10	ILLAELEQLK(0.763)GQGK(0.237)	-0.59476	LEQQNKILLAELEQLKGQGKSRLGDLYEEEM	P08670	139	Vimentin	VIM	P08670;B0YJC4	139;139
101	Mono	K	0.943662	10	IAGYVTH(0.056)LMK(0.944)	0.12349	KKLRNKIAGYVTHLMKRIQRGPVRGISIKLQ	P0CW22	59	40S ribosomal protein S17-like;40S ribosomal protein S17	RPS17L;RPS17	P0CW22;P08708;H0YN88;H0YK46	59;59;59;59
102	Mono	K	0.652781	2	IK(0.653)GEH(0.347)PGLSIGDVAK	-0.62339	PSAFFLFCSEYRPKIKGEHPGLSIGDVAKKL	P09429	114	High mobility group protein B1;Putative high mobility group protein B1-like 1	HMGB1;HMGB1P1	P09429;Q5T7C4;Q5T7C6;B2RPK0	114;114;114;114
103	Mono	K	1	14	SSGPYGGGGQYFAK(1)PR	-0.60443	GRSSGPYGGGGQYFAKPRNQGGYGGSSSSSS	P09651-2	298	Heterogeneous nuclear ribonucleoprotein A1;Heterogeneous nuclear ribonucleoprotein A1, N-terminally processed	HNRNPA1	P09651-2;P09651;F8W6I7;P09651-3;H0YH80	298;350;285;245;169
104	Mono	K	1	15	VVSEDFLQDVSASTK(1)	-3.3955	RVVSEDFLQDVSASTKSLQELFLAHILSPWG	P09874	467	Poly [ADP-ribose] polymerase 1	PARP1	P09874	467
105	Mono	K	0.488515	14	ATIAGGGVIPH(0.023)IH(0.489)K(0.489)	-0.44039	IKATIAGGGVIPHIHKSLIGKKGQQKTA___	Q71UI9	116	Histone H2A.V;Histone H2A.Z	H2AFV;H2AFZ	Q71UI9;P0C0S5;Q71UI9-3;Q71UI9-4	116;116;78;90
106	Mono	K	1	7	NDEELNK(1)LLGK	-0.10313	PRHLQLAIRNDEELNKLLGKVTIAQGGVLPN	Q99878	96	Histone H2A type 1-J;Histone H2A type 1-H;Histone H2A.J;Histone H2A type 2-C;Histone H2A type 2-A;Histone H2A type 1;Histone H2A type 1-D;Histone H2A	HIST1H2AJ;HIST1H2AH;H2AFJ;HIST2H2AC;HIST2H2AA3;HIST1H2AG;HIST1H2AD	Q99878;Q96KK5;Q9BTM1;Q16777;Q6FI13;P0C0S8;P20671;Q9BTM1-2;H0YFX9	96;96;96;96;96;96;96;96;59
107	Mono	K	0.999583	11	NDEELNKLLGK(1)	0.95177	QLAIRNDEELNKLLGKVTIAQGGVLPNIQAV	Q99878	100	Histone H2A type 1-J;Histone H2A type 1-H;Histone H2A.J;Histone H2A type 2-C;Histone H2A type 2-A;Histone H2A type 1;Histone H2A type 1-D;Histone H2A	HIST1H2AJ;HIST1H2AH;H2AFJ;HIST2H2AC;HIST2H2AA3;HIST1H2AG;HIST1H2AD	Q99878;Q96KK5;Q9BTM1;Q16777;Q6FI13;P0C0S8;P20671;Q9BTM1-2;H0YFX9	100;100;100;100;100;100;100;100;63
108	Mono	K	1	19	VTIAQGGVLPNIQAVLLPK(1)	0.46141	AQGGVLPNIQAVLLPKKTESHHKAKGK____;AQGGVLPNIQAVLLPKKTESHHKTK______	Q99878	119	Histone H2A type 1-J;Histone H2A type 1-H;Histone H2A.J;Histone H2A type 2-C;Histone H2A type 2-A;Histone H2A type 1;Histone H2A type 1-D;Histone H2A;Histone H2A type 1-A;Histone H2AX;Histone H2A type 1-C;Histone H2A type 3;Histone H2A type 1-B/E	HIST1H2AJ;HIST1H2AH;H2AFJ;HIST2H2AC;HIST2H2AA3;HIST1H2AG;HIST1H2AD;HIST1H2AA;H2AFX;HIST1H2AC;HIST3H2A;HIST1H2AB	Q99878;Q96KK5;Q9BTM1;Q16777;Q6FI13;P0C0S8;P20671;H0YFX9;Q96QV6;P16104;Q93077;Q7L7L0;P04908	119;119;119;119;119;119;119;82;119;119;119;119;119
109	Mono	K	1	8	LRQPFFQK(1)	-0.64023	KVEQKYNKLRQPFFQKRSELIAKIPNFWVTT	Q01105-3	59	Protein SET;Protein SETSIP	SET;SETSIP	Q01105-3;Q01105-4;Q01105-2;Q01105;P0DME0	59;62;71;83;93
110	Mono	K	1	11	ALAAAGYDVEK(1)NNSR	-1.7722	AALKKALAAAGYDVEKNNSRIKLGLKSLVSK	P16403	75	Histone H1.4;Histone H1.3;Histone H1.2;Histone H1.1;Histone H1t	HIST1H1E;HIST1H1D;HIST1H1C;HIST1H1A;HIST1H1T	P10412;P16402;P16403;Q02539;P22492	75;76;75;78;79
111	Mono	K	1	9	SGVSLAALK(1)	0.93965	VAASKERSGVSLAALKKALAAAGYDVEKNNS	P16403	63	Histone H1.4;Histone H1.3;Histone H1.2	HIST1H1E;HIST1H1D;HIST1H1C	P10412;P16402;P16403	63;64;63
112	Mono	K	0.879062	10	SGVSLAALK(0.121)K(0.879)	-0.28259	AASKERSGVSLAALKKALAAAGYDVEKNNSR	P16403	64	Histone H1.4;Histone H1.3;Histone H1.2;Histone H1.1;Histone H1t	HIST1H1E;HIST1H1D;HIST1H1C;HIST1H1A;HIST1H1T	P10412;P16402;P16403;Q02539;P22492	64;65;64;67;68
113	Mono	K	1	13	KASGPPVSELITK(1)	-0.61419	AKRKASGPPVSELITKAVAASKERSGVSLAA;GKRKASGPPVSELITKAVAASKERSGVSLAA;TPRKASGPPVSELITKAVAASKERSGVSLAA	P16403	46	Histone H1.4;Histone H1.3;Histone H1.2	HIST1H1E;HIST1H1D;HIST1H1C	P10412;P16402;P16403	46;47;46
114	Mono	K	1	12	GYISPYFINTSK(1)	0.6391	KFDRGYISPYFINTSKGQKCEFQDAYVLLSE	P10809	233	60 kDa heat shock protein, mitochondrial	HSPD1	P10809;E7ESH4	233;231
115	Mono	K	1	7	IGIEIIK(1)R	-0.36856	LTPANEDQKIGIEIIKRTLKIPAMTIAKNAG	P10809	469	60 kDa heat shock protein, mitochondrial	HSPD1	P10809	469
116	Mono	K	0.9956	5	SIDLK(0.996)DK(0.004)YK(0.001)	2.4374	KVTKDGVTVAKSIDLKDKYKNIGAKLVQDVA	P10809	87	60 kDa heat shock protein, mitochondrial	HSPD1	P10809;E7EXB4;E7ESH4;B7Z712;C9JL25;C9JCQ4	87;87;87;87;129;87
117	Mono	K	0.91262	7	SIDLK(0.086)DK(0.913)YK(0.002)	1.4982	TKDGVTVAKSIDLKDKYKNIGAKLVQDVANN	P10809	89	60 kDa heat shock protein, mitochondrial	HSPD1	P10809;E7EXB4;E7ESH4;B7Z712;C9JL25;C9JCQ4	89;89;89;89;131;89
118	Mono	K	1	9	VGLQVVAVK(1)	0.30455	LVLNRLKVGLQVVAVKAPGFGDNRKNQLKDM	P10809	301	60 kDa heat shock protein, mitochondrial	HSPD1	P10809	301
119	Mono	K	0.5	16	IINEPTAAAIAYGLDK(0.5)K(0.5)	-0.752	IINEPTAAAIAYGLDKKVGAERNVLIFDLGG	P11142	187	Heat shock cognate 71 kDa protein;Heat shock-related 70 kDa protein 2	HSPA8;HSPA2	P11142;E9PKE3;P11142-2;E9PN89;P54652;E9PI65	187;168;187;127;188;146
120	Mono	K	0.53684	17	IINEPTAAAIAYGLDK(0.463)K(0.537)	-1.0176	INEPTAAAIAYGLDKKVGAERNVLIFDLGGG	P11142	188	Heat shock cognate 71 kDa protein;Heat shock-related 70 kDa protein 2	HSPA8;HSPA2	P11142;E9PKE3;P11142-2;E9PN89;P54652;E9PI65	188;169;188;128;189;147
121	Mono	K	0.944754	13	LLQDFFNGK(0.055)ELNK(0.945)	-0.039697	IQKLLQDFFNGKELNKSINPDEAVAYGAAVQ;VQKLLQDFFNGKELNKSINPDEAVAYGAAVQ	P11142	361	Heat shock cognate 71 kDa protein;Heat shock-related 70 kDa protein 2;Heat shock 70 kDa protein 6	HSPA8;HSPA2;HSPA6	P11142;E9PKE3;P11142-2;E9PN89;E9PNE6;A8K7Q2;P54652;P17066	361;342;361;301;215;125;364;363
122	Mono	K	0.999976	11	MKEIAEAYLGK(1)	2.272	MVLTKMKEIAEAYLGKTVTNAVVTVPAYFND	P11142	137	Heat shock cognate 71 kDa protein	HSPA8	P11142;E9PKE3;P11142-2;E9PN89;E9PLF4;E9PQQ4;E9PQK7;E9PK54;E9PPY6;E9PI65	137;137;137;77;137;137;137;137;137;96
123	Mono	K	1	10	MVNHFIAEFK(1)	-0.065518	EDFDNRMVNHFIAEFKRKHKKDISENKRAVR	P11142	246	Heat shock cognate 71 kDa protein	HSPA8	P11142;E9PKE3;P11142-2;E9PN89;A8K7Q2	246;227;246;186;10
124	Mono	K	1	8	FGPALSVK(1)	0.68736	RLKDLFGKFGPALSVKVMTDESGKSKGFGFV	P11940	221	Polyadenylate-binding protein 1;Polyadenylate-binding protein 3	PABPC1;PABPC3	P11940;E7EQV3;E7ERJ7;P11940-2;Q9H361;H0YAR2;H0YAP2;H0YBN4	221;176;189;221;221;90;19;168
125	Mono	K	0.5	8	LVQGSILK(0.5)K(0.5)	1.0535	___MFEARLVQGSILKKVLEALKDLINEACW	P12004	13	Proliferating cell nuclear antigen	PCNA	P12004	13
126	Mono	K	0.5	9	LVQGSILK(0.5)K(0.5)	1.0535	__MFEARLVQGSILKKVLEALKDLINEACWD	P12004	14	Proliferating cell nuclear antigen	PCNA	P12004	14
127	Mono	K	1	18	CELLYEGPPDDEAAMGIK(1)	-0.28663	LLYEGPPDDEAAMGIKSCDPKGPLMMYISKM	P13639	386	Elongation factor 2	EEF2	P13639	386
128	Mono	K	0.999985	18	GHVFEESQVAGTPMFVVK(1)	1.2589	VFEESQVAGTPMFVVKAYLPVNESFGFTADL	P13639	785	Elongation factor 2	EEF2	P13639	785
129	Mono	K	1	9	IKPVLMMNK(1)	-0.56379	RQAIAERIKPVLMMNKMDRALLELQLEPEEL	P13639	159	Elongation factor 2	EEF2	P13639	159
130	Mono	K	0.997649	13	VAVEAK(0.002)NPADLPK(0.998)	-0.15593	VVRVAVEAKNPADLPKLVEGLKRLAKSDPMV	P13639	519	Elongation factor 2	EEF2	P13639	519
131	Mono	K	1	11	VFSGLVSTGLK(1)	0.96659	YAFGRVFSGLVSTGLKVRIMGPNYTPGKKED	P13639	426	Elongation factor 2	EEF2	P13639	426
132	Mono	K	1	8	ALEALVAK(1)	-0.22254	THYKETWKALEALVAKGLVQALGLSNFNSRQ	P14550	153	Alcohol dehydrogenase [NADP(+)]	AKR1A1	P14550	153
133	Mono	K	1	11	GDLGIEIPAEK(1)	-0.063894	IMVARGDLGIEIPAEKVFLAQKMMIGRCNRA	P14618	305	Pyruvate kinase PKM;Pyruvate kinase PKLR;Pyruvate kinase	PKM;PKLR;PKM2	P14618;P14618-3;P30613-2;P30613;P14618-2;H3BTN5;Q504U3	305;290;317;348;305;305;140
134	Mono	K	0.737471	6	SVETLK(0.737)EMIK(0.263)	-0.13925	IICTIGPASRSVETLKEMIKSGMNVARLNFS	P14618	62	Pyruvate kinase PKM;Pyruvate kinase	PKM	P14618;H3BQ34;H3BT25;H3BUW1;H3BTJ2;H3BU13;P14618-2;H3BTN5	62;62;62;62;62;62;62;62
135	Mono	K	1	9	VNFAMNVGK(1)	0.08683	AEDVDLRVNFAMNVGKARGFFKKGDVVIVLT	P14618	498	Pyruvate kinase PKM;Pyruvate kinase	PKM;PKM2	P14618;P14618-3;P14618-2;Q504U3	498;483;498;333
136	Mono	K	1	14	AITHLNNNFMFGQK(1)	2.7108	DRAITHLNNNFMFGQKLNVCVSKQPAIMPGQ	P14866	448	Heterogeneous nuclear ribonucleoprotein L	HNRNPL	P14866;M0QXS5;P14866-2;M0QYT0	448;389;315;65
137	Mono	K	1	7	AIFAGYK(1)R	0.91688	_MSGRLWSKAIFAGYKRGLRNQREHTALLKI	P18077	15	60S ribosomal protein L35a	RPL35A	P18077;C9K025;F8WBS5;F8WB72	15;15;15;15
138	Mono	K	1	8	SVNELIYK(1)R	-0.20646	AWGYPNLKSVNELIYKRGYGKINKKRIALTD	P18124	156	60S ribosomal protein L7	RPL7	P18124;A8MUD9	156;116
139	Mono	K	1	5	LRDNK(1)GTPR	0.69884	VAATLGAILNRLRDNKGTPRLRTTVGVDGSL	P19367	401	Hexokinase-1	HK1	P19367;E7ENR4;P19367-4;P19367-2;P19367-3	401;436;389;400;405
140	Mono	K	1	7	LAVYIDK(1)VR	-1.2536	EELRELNDRLAVYIDKVRSLETENSALQLQV	P20700	49	Lamin-B1	LMNB1	P20700;E9PBF6	49;49
141	Mono	K	1	10	LTLSALLDGK(1)	-0.6998	LKPGIKLTLSALLDGKNVNAGGHKLGLGLEF	P21796	266	Voltage-dependent anion-selective channel protein 1	VDAC1	P21796	266
142	Mono	K	1	8	GLGVEIAK(1)	-0.84113	SVLVSGLRGLGVEIAKNIILGGVKAVTLHDQ	P22314	89	Ubiquitin-like modifier-activating enzyme 1	UBA1	P22314;Q5JRR9;Q5JRS0;Q5JRS2;Q5JRS1;Q5JRS3	89;89;103;140;103;140
143	Mono	K	1	10	DRPFFAGLVK(1)	-0.2778	HYVDLKDRPFFAGLVKYMHSGPVVAMVWEGL	Q32Q12	91	Nucleoside diphosphate kinase;Nucleoside diphosphate kinase B;Nucleoside diphosphate kinase A	NME1-NME2;NME2;NME1	Q32Q12;P22392-2;J3KPD9;E7ERL0;P15531;P15531-2;E5RHP0	91;66;66;91;66;91;66
144	Mono	K	1	8	GLVGEIIK(1)R	0.58579	IKPDGVQRGLVGEIIKRFEQKGFRLVGLKFM	Q32Q12	51	Nucleoside diphosphate kinase;Nucleoside diphosphate kinase B;Nucleoside diphosphate kinase A	NME1-NME2;NME2;NME1	Q32Q12;P22392-2;J3KPD9;P22392;E7ERL0;P15531;P15531-2;E5RHP0;C9K028	51;26;26;26;51;26;51;26;51
145	Mono	K	1	6	TFIAIK(1)PDGVQR	2.4057	DTGTMANCERTFIAIKPDGVQRGLVGEIIKR	Q32Q12	37	Nucleoside diphosphate kinase;Nucleoside diphosphate kinase B;Nucleoside diphosphate kinase A	NME1-NME2;NME2;NME1	Q32Q12;P22392-2;J3KPD9;P22392;E7ERL0;P15531;P15531-2;E5RHP0;C9K028	37;12;12;12;37;12;37;12;37
146	Mono	K	1	8	GIVEFASK(1)PAAR	0.1272	DRGRSTGKGIVEFASKPAARKAFERCSEGVF	P23246	421	Splicing factor, proline- and glutamine-rich	SFPQ	P23246;P23246-2	421;421
147	Mono	K	1	3	GGK(1)PEPPAMPQPVPTA	-0.53414	DEILPTTPISEQKGGKPEPPAMPQPVPTA__	P23396	230	40S ribosomal protein S3	RPS3	P23396;P23396-2;E9PL09;E9PPU1;H0YEU2	230;246;218;145;158
148	Mono	K	1	11	YALYDATYETK(1)	-0.61683	DKDCRYALYDATYETKESKKEDLVFIFWAPE;LNDCRYALYDATYETKESKKEDLVFIFWAPE	P23528	92	Cofilin-1;Cofilin-2	CFL1;CFL2	P23528;E9PP50;G3V1A4;E9PK25;E9PQB7;E9PLJ3;Q9Y281;Q9Y281-3	92;92;75;130;75;75;92;75
149	Mono	K	0.993918	7	VITEEEK(0.994)NFK(0.006)	0.48699	NVYKKEKARVITEEEKNFKAFASLRMARANA	P26373	174	60S ribosomal protein L13	RPL13	P26373;P26373-2;H3BUK8;J3KS98	174;127;20;41
150	Mono	K	1	13	MDGIVPDIAVGTK(1)R	-0.73902	___MDGIVPDIAVGTKRGSDELFSTCVTNGP	P26599	13	Polypyrimidine tract-binding protein 1	PTBP1	P26599;P26599-2;P26599-3;K7EKJ7;A6NLN1;K7ELW5	13;13;13;13;13;13
151	Mono	K	0.999023	10	AKDPFAH(0.001)LPK(0.999)	0.93853	LAAEPKAKDPFAHLPKSTFVLDEFKRKYSNE	P26641	285	Elongation factor 1-gamma	EEF1G	P26641;B4DTG2	285;335
152	Mono	K	1	9	STFVLDEFK(1)R	-1.6663	PFAHLPKSTFVLDEFKRKYSNEDTLSVALPY	P26641	294	Elongation factor 1-gamma	EEF1G	P26641;B4DTG2	294;344
153	Mono	K	1	8	NLLSVAYK(1)	0.30931	AELSNEERNLLSVAYKNVVGARRSSWRVVSS;AELSNEERNLLSVAYKNVVGGRRSAWRVISS;EPLSNEDRNLLSVAYKNVVGARRSSWRVISS;EPLSNEERNLLSVAYKNVVGARRSSWRVISS;HELSNEERNLLSVAYKNVVGARRSSWRVISS;VELTVEERNLLSVAYKNVIGARRASWRIISS	P62258	50	14-3-3 protein theta;14-3-3 protein beta/alpha;14-3-3 protein beta/alpha, N-terminally processed;14-3-3 protein gamma;14-3-3 protein gamma, N-terminally processed;14-3-3 protein epsilon;14-3-3 protein zeta/delta;14-3-3 protein sigma;14-3-3 protein eta	YWHAQ;YWHAB;YWHAG;YWHAE;YWHAZ;SFN;YWHAH	P27348;E9PG15;P31946;Q4VY20;Q4VY19;P31946-2;P61981;P62258;P62258-2;B4DJF2;I3L3T1;K7EIT4;P63104;E7EX29;E7ESK7;E5RGE1;E5RIR4;E9PD24;E7EVZ2;P31947-2;P31947;Q04917;A2IDB2	49;49;51;51;51;49;50;50;28;50;50;29;49;49;49;49;49;49;49;49;49;50;37
154	Mono	K	0.999882	9	KVHVIFNYK(1)	-0.16967	ICGPGTKKVHVIFNYKGKNVLINKDIRCKDD	P27797	151	Calreticulin	CALR	P27797;K7EJB9	151;83
155	Mono	K	0.5	9	VVFVFGPDK(0.5)K(0.5)	-0.15876	GMPVTARVVFVFGPDKKLKLSILYPATTGRN	P30041	141	Peroxiredoxin-6	PRDX6	P30041	141
156	Mono	K	0.575992	10	VVFVFGPDK(0.424)K(0.576)	0.49187	MPVTARVVFVFGPDKKLKLSILYPATTGRNF	P30041	142	Peroxiredoxin-6	PRDX6	P30041	142
157	Mono	K	0.802251	13	ACARPLISVYSEK(0.802)GESSGK(0.198)	-0.40047	__MACARPLISVYSEKGESSGKNVTLPAVFK	P36578	14	60S ribosomal protein L4	RPL4	P36578;H3BTP7;H3BU31	14;14;14
158	Mono	K	0.5	7	ALAAFLK(0.5)K(0.5)	0.4458	DVNQQEFVRALAAFLKKSGKLKVPEWVDTVK	P39019	23	40S ribosomal protein S19	RPS19	P39019;M0R2L9;M0QXK4;M0QYF7;M0R140	23;22;23;23;23
159	Mono	K	0.5	8	ALAAFLK(0.5)K(0.5)	0.4458	VNQQEFVRALAAFLKKSGKLKVPEWVDTVKL	P39019	24	40S ribosomal protein S19	RPS19	P39019;M0R2L9;M0QXK4;M0QYF7;M0R140	24;23;24;24;24
160	Mono	K	1	10	RVLQALEGLK(1)	-0.20752	SKSVARRVLQALEGLKMVEKDQDGGRKLTPQ	P39019	111	40S ribosomal protein S19	RPS19	P39019	111
161	Mono	K	0.5	7	AFMGPLK(0.5)K(0.5)	-0.14872	RFQTMEEKKAFMGPLKKDRIAKEEGA_____	P39023	393	60S ribosomal protein L3	RPL3	P39023;G5E9G0	393;341
162	Mono	K	0.5	8	AFMGPLK(0.5)K(0.5)	-0.14872	FQTMEEKKAFMGPLKKDRIAKEEGA______	P39023	394	60S ribosomal protein L3	RPL3	P39023;G5E9G0	394;342
163	Mono	K	0.999983	4	ALEK(1)IDLK	0.32508	LRKSLLVQTKRRALEKIDLKFIDTTSKFGHG	P39023	362	60S ribosomal protein L3	RPL3	P39023;G5E9G0	362;310
164	Mono	K	0.999898	12	TVFAEHISDECK(1)	-1.5909	RTFKTVFAEHISDECKRRFYKNWHKSKKKAF	P39023	115	60S ribosomal protein L3	RPL3	P39023;G5E9G0;H7C422;B5MCW2;H7C3M2;F8WCR1	115;63;142;63;147;115
165	Mono	K	0.999902	9	YKPLDLRPK(1)	0.4174	KFYKGKKYKPLDLRPKKTRAMRRRLNKHEEN	P42766	86	60S ribosomal protein L35	RPL35	P42766	86
166	Mono	K	1	8	GFGFGLVK(1)	-1.0984	AARDIFNKGFGFGLVKLDVKTKSCSGVEFST	P45880	39	Voltage-dependent anion-selective channel protein 2	VDAC2	P45880;Q5JSD2;Q5JSD1;P45880-2;P45880-1;A2A3S1	39;39;39;28;54;54
167	Mono	K	0.999685	5	INFDK(1)YHPGYFGK	0.35685	RGNAGGLHHHRINFDKYHPGYFGKVGMKHYH	P46776	47	60S ribosomal protein L27a	RPL27A	P46776;E9PLL6	47;47
168	Mono	K	1	13	INFDKYHPGYFGK(1)	0.47542	HHRINFDKYHPGYFGKVGMKHYHLKRNQSFC	P46776	55	60S ribosomal protein L27a	RPL27A	P46776;E9PLL6	55;55
169	Mono	K	0.99909	12	TTTGNK(0.001)VFGALK(0.999)	0.58504	GLARTTTGNKVFGALKGAVDGGLSIPHSTKR	P46777	164	60S ribosomal protein L5	RPL5	P46777;Q5T7N0	164;114
170	Mono	K	1	15	VYNVTQHAVGIVVNK(1)	-0.12479	RVYNVTQHAVGIVVNKQVKGKILAKRINVRI	P46778	78	60S ribosomal protein L21	RPL21	P46778;M0R181;G3V1B3	78;78;78
171	Mono	K	1	8	RLQTQVFK(1)	-0.091806	KIEDFLERRLQTQVFKLGLAKSIHHARVLIR	P46781	116	40S ribosomal protein S9	RPS9	P46781;B5MCT8;C9JM19	116;116;116
172	Mono	K	0.577156	8	IVYLYTK(0.423)K(0.577)	0.84265	LSRTPGNRIVYLYTKKVGKAPKSACGVCPGR	P49207	37	60S ribosomal protein L34	RPL34	P49207	37
173	Mono	K	1	15	VVVQVLAEEPEAVLK(1)	0.31231	KVVVQVLAEEPEAVLKGAKPKLMSAISKTFC	P49327	1866	Fatty acid synthase;[Acyl-carrier-protein] S-acetyltransferase;[Acyl-carrier-protein] S-malonyltransferase;3-oxoacyl-[acyl-carrier-protein] synthase;3-oxoacyl-[acyl-carrier-protein] reductase;3-hydroxyacyl-[acyl-carrier-protein] dehydratase;Enoyl-[acyl-carrier-protein] reductase;Oleoyl-[acyl-carrier-protein] hydrolase	FASN	P49327	1866
174	Mono	K	0.5	11	TVVTGIEMFH(0.5)K(0.5)	-2.5671	SKNIRTVVTGIEMFHKSLERAEAGDNLGALV	P49411	311	Elongation factor Tu, mitochondrial	TUFM	P49411	311
175	Mono	K	1	8	AYILNLVK(1)	0.032393	DRVLREERAYILNLVKQIKKTGCNVLLIQKS	P50991	288	T-complex protein 1 subunit delta	CCT4	P50991;P50991-2;B7Z9L0;B7Z2F4	288;258;232;138
176	Mono	K	1	3	IEK(1)ER(0.984)MR(0.016)	-2.5564	ANTEREQKKENERIEKERMRRLMAEDEEGYR	Q9HBD4	524	Transcription activator BRG1;Probable global transcription activator SNF2L2	SMARCA4;SMARCA2	Q9HBD4;P51532-5;P51532-2;P51532-3;P51532-4;P51532;P51531-2;P51531;F6VDE0	524;524;524;524;524;524;500;500;500
177	Mono	K	1	9	FLASR(1)LSMK(1)	-1.7287	YPPSAGRFLASRLSMKQHLDSLFDNHSWALM	P51801-2	186	Chloride channel protein ClC-Kb	CLCNKB	P51801-2;P51801	186;355
178	Mono	K	1	11	AFITNIPFDVK(1)	-0.13181	TKRYRAFITNIPFDVKWQSLKDLVKEKVGEV	P52272-2	83	Heterogeneous nuclear ribonucleoprotein M	HNRNPM	P52272-2;P52272;M0R2T0;M0R019;M0R0N3;M0QYQ7;M0R0Y6	83;83;83;83;83;83;83
179	Mono	K	1	13	MLGPEGGEGFVVK(1)	-1.8925	__MMLGPEGGEGFVVKLRGLPWSCSVEDVQN	P52597	14	Heterogeneous nuclear ribonucleoprotein F;Heterogeneous nuclear ribonucleoprotein F, N-terminally processed	HNRNPF	P52597	14
180	Mono	K	1	7	RYIGIVK(1)	-0.33761	PYDRPGTARRYIGIVKQAGLERMRPGAYSTG	P52597	224	Heterogeneous nuclear ribonucleoprotein F;Heterogeneous nuclear ribonucleoprotein F, N-terminally processed	HNRNPF	P52597	224
181	Mono	K	1	7	ASGADSK(1)GDDLSTAILK	-0.71929	________MASGADSKGDDLSTAILKQKNRP	P55072	8	Transitional endoplasmic reticulum ATPase	VCP	P55072	8
182	Mono	K	0.709928	17	ASGADSK(0.29)GDDLSTAILK(0.71)	-1.2839	SGADSKGDDLSTAILKQKNRPNRLIVDEAIN	P55072	18	Transitional endoplasmic reticulum ATPase	VCP	P55072	18
183	Mono	K	1	2	EK(1)TH(1)GEVERR	-0.061952	IIFIDELDAIAPKREKTHGEVERRIVSQLLT	P55072	315	Transitional endoplasmic reticulum ATPase	VCP	P55072	315
184	Mono	K	1	1	K(1)ESYSVYVYK	-0.16719	TKAQKKDGKKRKRSRKESYSVYVYKVLKQVH;TKAQKKDGRKRKRSRKESYSVYVYKVLKQVH	U3KQK0	35	Histone H2B type F-S;Histone H2B;Histone H2B type 1-M;Histone H2B type 1-N;Histone H2B type 1-H;Histone H2B type 2-F;Histone H2B type 1-C/E/F/G/I;Histone H2B type 1-D;Histone H2B type 1-L	H2BFS;HIST1H2BN;HIST1H2BM;HIST1H2BH;HIST2H2BF;HIST1H2BC;HIST1H2BD;HIST1H2BL	P57053;U3KQK0;Q99879;Q99877;Q93079;Q5QNW6;P62807;P58876;Q5QNW6-2;B4DR52;Q99880	35;35;35;35;35;35;35;35;35;35;35
185	Mono	K	0.999954	10	KESYSVYVYK(1)	0.080539	KRKRSRKESYSVYVYKVLKQVHPDTGISSKA	U3KQK0	44	Histone H2B type F-S;Histone H2B;Histone H2B type 1-M;Histone H2B type 1-N;Histone H2B type 1-H;Histone H2B type 2-F;Histone H2B type 1-C/E/F/G/I;Histone H2B type 1-D;Histone H2B type 1-L	H2BFS;HIST1H2BN;HIST1H2BM;HIST1H2BH;HIST2H2BF;HIST1H2BC;HIST1H2BD;HIST1H2BL	P57053;U3KQK0;Q99879;Q99877;Q93079;Q5QNW6;P62807;P58876;Q5QNW6-2;B4DR52;Q99880	44;44;44;44;44;44;44;44;44;44;44
186	Mono	K	1	10	IAVAAQNCYK(1)	-0.29569	QKLDPKIAVAAQNCYKVTNGAFTGEISPGMI	P60174-1	69	Triosephosphate isomerase	TPI1	P60174-1;P60174	69;106
187	Mono	K	1	15	VVLAYEPVWAIGTGK(1)	-0.31886	KVVLAYEPVWAIGTGKTATPQQAQEVHEKLR	P60174-1	175	Triosephosphate isomerase	TPI1	P60174-1;P60174;P60174-4;U3KPZ0;U3KQF3	175;212;93;93;93
188	Mono	K	1	17	DDDIAALVVDNGSGMCK(1)	0.1729	DDIAALVVDNGSGMCKAGFAGDDAPRAVFPS	P60709	18	Actin, cytoplasmic 1;Actin, cytoplasmic 1, N-terminally processed	ACTB	P60709;G5E9R0;E7EVS6;C9JZR7;C9JUM1;C9JTX5	18;18;18;18;21;18
189	Mono	K	1	14	LDLAGRDLTDYLMK(1)	1.4111	LRLDLAGRDLTDYLMKILTERGYNFTTTAER;LRLDLAGRDLTDYLMKILTERGYSFTTTAER	P63261	191	Actin, cytoplasmic 1;Actin, cytoplasmic 1, N-terminally processed;Actin, alpha skeletal muscle;Actin, alpha cardiac muscle 1;Actin, gamma-enteric smooth muscle;Actin, aortic smooth muscle;Actin, cytoplasmic 2;Actin, cytoplasmic 2, N-terminally processed;Beta-actin-like protein 2	ACTB;ACTA1;ACTC1;ACTG2;ACTA2;ACTG1;ACTBL2	P60709;P68133;P68032;Q5T8M7;P63267;P62736;P63267-2;P63261;I3L3I0;I3L1U9;I3L4N8;Q562R1	191;193;193;158;192;193;149;191;191;191;182;192
190	Mono	K	1	11	EITALAPSTMK(1)	0.41497	DRMQKEITALAPSTMKIKIIAPPERKYSVWI	P63261	326	Actin, cytoplasmic 1;Actin, cytoplasmic 1, N-terminally processed;Actin, alpha skeletal muscle;Actin, alpha cardiac muscle 1;Actin, gamma-enteric smooth muscle;Actin, aortic smooth muscle;Actin, cytoplasmic 2;Actin, cytoplasmic 2, N-terminally processed	ACTB;ACTA1;ACTC1;ACTG2;ACTA2;ACTG1	P60709;P68133;P68032;Q5T8M7;P63267;P62736;Q5T8M8;A6NL76;P63267-2;P63261	326;328;328;293;327;328;238;240;284;326
191	Mono	K	1	11	HQGVMVGMGQK(1)	-0.40049	VGRPRHQGVMVGMGQKDSYVGDEAQSKRGIL	P63261	50	Actin, cytoplasmic 1;Actin, cytoplasmic 1, N-terminally processed;Actin, alpha skeletal muscle;Actin, alpha cardiac muscle 1;Actin, gamma-enteric smooth muscle;Actin, aortic smooth muscle;Actin, cytoplasmic 2;Actin, cytoplasmic 2, N-terminally processed	ACTB;ACTA1;ACTC1;ACTG2;ACTA2;ACTG1	P60709;P68133;P68032;Q5T8M7;P63267;P62736;Q5T8M8;A6NL76;G5E9R0;E7EVS6;C9JZR7;C9JUM1;C9JTX5;F8WB63;B8ZZJ2;C9JFL5;F6UVQ4;F6QUT6;P63261;I3L3I0;I3L1U9;K7EM38;I3L3R2;J3KT65	50;52;52;52;51;52;52;52;50;50;50;53;50;51;51;51;52;52;50;50;50;50;50;50
192	Mono	K	0.999967	22	HQGVMVGMGQKDSYVGDEAQSK(1)R	-0.85503	GMGQKDSYVGDEAQSKRGILTLKYPIEHGIV	P63261	61	Actin, cytoplasmic 1;Actin, cytoplasmic 1, N-terminally processed;Actin, alpha skeletal muscle;Actin, alpha cardiac muscle 1;Actin, gamma-enteric smooth muscle;Actin, aortic smooth muscle;Actin, cytoplasmic 2;Actin, cytoplasmic 2, N-terminally processed	ACTB;ACTA1;ACTC1;ACTG2;ACTA2;ACTG1	P60709;P68133;P68032;Q5T8M7;P63267;P62736;Q5T8M8;A6NL76;G5E9R0;E7EVS6;C9JZR7;C9JUM1;C9JTX5;F8WB63;B8ZZJ2;C9JFL5;F6UVQ4;F6QUT6;P63261;I3L3I0;I3L1U9;K7EM38;I3L3R2;J3KT65	61;63;63;63;62;63;63;63;61;61;61;64;61;62;62;62;63;63;61;61;61;61;61;61
193	Mono	K	1	18	VAPEEHPVLLTEAPLNPK(1)	0.86516	PEEHPVLLTEAPLNPKANREKMTQIMFETFN	P63261	113	Actin, cytoplasmic 1;Actin, cytoplasmic 1, N-terminally processed;Actin, cytoplasmic 2;Actin, cytoplasmic 2, N-terminally processed	ACTB;ACTG1	P60709;G5E9R0;E7EVS6;P63261;I3L3I0;I3L1U9;I3L4N8;K7EM38;I3L3R2;J3KT65	113;113;113;113;113;113;104;113;113;113
194	Mono	K	1	7	AILPCIK(1)	-0.321	EKPSAIQQRAILPCIKGYDVIAQAQSGTGKT	P60842	68	Eukaryotic initiation factor 4A-I	EIF4A1	P60842;J3KT12;P60842-2;J3KTB5;J3QS69;J3QR64;J3QL43;J3QLN6;J3QKZ9;J3KS25;B4E102;J3KT04;J3KS93;J3QQP0	68;68;68;52;68;79;68;32;32;66;52;69;52;68
195	Mono	K	0.999609	3	GFK(1)DQIYDIFQK	3.1496	MFVLDEADEMLSRGFKDQIYDIFQKLNSNTQ	P60842	193	Eukaryotic initiation factor 4A-I	EIF4A1	P60842;J3KT12;P60842-2;J3KTB5;J3QS69;J3QR64;J3KSZ0;J3QL43;J3KTN0	193;193;193;177;191;204;76;193;16
196	Mono	K	0.999999	12	GFKDQIYDIFQK(1)	-1.0781	MLSRGFKDQIYDIFQKLNSNTQVVLLSATMP	P60842	202	Eukaryotic initiation factor 4A-I	EIF4A1	P60842;J3KT12;P60842-2;J3KTB5;J3QS69;J3QR64;J3KSZ0;J3QL43;J3KTN0	202;202;202;186;200;213;85;202;25
197	Mono	K	0.99975	8	IYHPNVDK(1)LGR	-0.21907	PKVRFMTKIYHPNVDKLGRICLDILKDKWSP	P61088	82	Ubiquitin-conjugating enzyme E2 N	UBE2N	P61088;F8VSD4;F8VV71;F8VQQ8	82;82;82;19
198	Mono	K	0.852788	8	EVQTNDLK(0.853)EVVNK(0.147)	1.115	KMMEIMTREVQTNDLKEVVNKLIPDSIGKDI	P61247	182	40S ribosomal protein S3a	RPS3A	P61247;H0Y9Y4;D6RG13;D6RAT0;D6RB09;D6R9B6;F5H4F9;E9PFI5	182;126;162;145;145;63;169;182
199	Mono	K	0.999916	11	ASLLKVDQEVK(1)	2.0636	____MASLLKVDQEVKLKVDSFRERITSEAE	P61289	12	Proteasome activator complex subunit 3	PSME3;DKFZp686J2076	P61289;P61289-2;K7ESG5;K7ENH2;B7Z8D3;Q6MZZ1;K7EJF8	12;12;12;12;12;12;12
200	Mono	K	1	13	ISSLLEEQFQQGK(1)	-0.018609	NAKISSLLEEQFQQGKLLACIASRPGQCGRA	Q5JR95	150	40S ribosomal protein S8	RPS8	Q5JR95;P62241	150;170
201	Mono	K	1	8	ALVAYYQK(1)	0.56043	AIRQSISKALVAYYQKYVDEASKKEIKDILI	P62249	98	40S ribosomal protein S16	RPS16	P62249;M0R210;M0R3H0;M0R1M5;M0QX76	98;81;98;81;48
202	Mono	K	1	10	LLEPVLLLGK(1)	0.4172	RTLQYKLLEPVLLLGKERFAGVDIRVRVKGG	P62249	60	40S ribosomal protein S16	RPS16	P62249;M0R210;M0R3H0;M0R1M5;Q6IPX4;M0QX76	60;43;60;43;60;10
203	Mono	K	1	12	MDDREDLVYQAK(1)	-1.5096	____MDDREDLVYQAKLAEQAERYDEMVESM	P62258	12	14-3-3 protein epsilon	YWHAE	P62258;B4DJF2;I3L3T1;I3L0W5	12;12;12;12
204	Mono	K	0.828893	11	ANPFGGASH(0.171)AK(0.829)	0.50756	GTALKANPFGGASHAKGIVLEKVGVEAKQPN	P62266	48	40S ribosomal protein S23	RPS23	P62266;D6RD47;D6RIX0;D6R9I7;D6RDJ2	48;48;48;48;48
205	Mono	K	0.99184	7	SLVIPEK(0.992)FQH(0.008)ILR	0.69378	________MSLVIPEKFQHILRVLNTNIDGR	P62269	8	40S ribosomal protein S18	RPS18	P62269	8
206	Mono	K	0.995255	12	LTSDDVK(0.005)EQIYK(0.995)	0.83805	TWLKLTSDDVKEQIYKLAKKGLTPSQIGVIL	P62277	39	40S ribosomal protein S13	RPS13	P62277;J3KMX5;E9PS50	39;39;39
207	Mono	K	1	12	AYQKQPTIFQNK(1)	-0.29117	QTERAYQKQPTIFQNKKRVLLGETGKEKLPR	P62280	20	40S ribosomal protein S11	RPS11	P62280;M0QZC5;M0R1H6	20;20;20
208	Mono	K	0.5	10	EAIEGTYIDK(0.5)K(0.5)	-0.41009	GFKTPKEAIEGTYIDKKCPFTGNVSIRGRIL	P62280	58	40S ribosomal protein S11	RPS11	P62280;M0QZC5	58;58
209	Mono	K	0.5	11	EAIEGTYIDK(0.5)K(0.5)	-0.41009	FKTPKEAIEGTYIDKKCPFTGNVSIRGRILS	P62280	59	40S ribosomal protein S11	RPS11	P62280;M0QZC5	59;59
210	Mono	K	1	13	AGVNTVTTLVENK(1)	-0.40437	VLRAGVNTVTTLVENKKAQLVVIAHDVDPIE	P62424	150	60S ribosomal protein L7a	RPL7A	P62424;Q5T8U2;Q5T8U3	150;35;177
211	Mono	K	1	9	KVVNPLFEK(1)	0.21606	VKKQEAKKVVNPLFEKRPKNFGIGQDIQPKR	P62424	34	60S ribosomal protein L7a	RPL7A	P62424;Q5T8U3	34;61
212	Mono	K	0.966273	13	ERHPGSFDVVH(0.034)VK(0.966)	1.2479	TNRERHPGSFDVVHVKDANGNSFATRLSNIF	P62701	211	40S ribosomal protein S4, X isoform;40S ribosomal protein S4, Y isoform 1	RPS4X;RPS4Y1	P62701;C9JEH7;P22090	211;220;211
213	Mono	K	1	9	LSNIFVIGK(1)	0.17503	GNSFATRLSNIFVIGKGNKPWISLPRGKGIR	P62701	230	40S ribosomal protein S4, X isoform	RPS4X	P62701	230
214	Mono	K	0.5	10	DAVTYTEH(0.5)AK(0.5)	-0.2522	LENVIRDAVTYTEHAKRKTVTAMDVVYALKR	P62805	78	Histone H4	HIST1H4A	P62805	78
215	Mono	K	1	8	DNIQGITK(1)PAIRR	-0.45438	KRHRKVLRDNIQGITKPAIRRLARRGGVKRI	P62805	32	Histone H4	HIST1H4A	P62805	32
216	Mono	K	1	14	ISGLIYEETRGVLK(1)	-0.011858	KRISGLIYEETRGVLKVFLENVIRDAVTYTE	P62805	60	Histone H4	HIST1H4A	P62805	60
217	Mono	K	0.999983	1	K(1)TVTAMDVVYALKR	0.63756	NVIRDAVTYTEHAKRKTVTAMDVVYALKRQG	P62805	80	Histone H4	HIST1H4A	P62805	80
218	Mono	K	1	12	TVTAMDVVYALK(1)R	0.51817	AKRKTVTAMDVVYALKRQGRTLYGFGG____	P62805	92	Histone H4	HIST1H4A	P62805	92
219	Mono	K	1	20	ISLGLPVGAVINCADNTGAK(1)	-0.37614	LPVGAVINCADNTGAKNLYIISVKGIKGRLN	P62829	35	60S ribosomal protein L23	RPL23	P62829;C9JD32;J3KT29;B9ZVP7	35;39;35;35
220	Mono	K	1	13	KYDAFLASESLIK(1)	0.51343	LAKKYDAFLASESLIKQIPRILGPGLNKAGK	P62906	118	60S ribosomal protein L10a	RPL10A	P62906	118
221	Mono	K	0.99871	7	ALSTGEK(0.999)GFGYK(0.001)	0.57217	VPKTAENFRALSTGEKGFGYKGSCFHRIIPG	P62937	44	Peptidyl-prolyl cis-trans isomerase A;Peptidyl-prolyl cis-trans isomerase A, N-terminally processed;Peptidyl-prolyl cis-trans isomerase	PPIA	P62937;F8WE65;C9J5S7	44;44;44
222	Mono	K	1	6	SIYGEK(1)FEDENFILK	0.31876	FTRHNGTGGKSIYGEKFEDENFILKHTGPGI	P62937	82	Peptidyl-prolyl cis-trans isomerase A;Peptidyl-prolyl cis-trans isomerase A, N-terminally processed;Peptidyl-prolyl cis-trans isomerase	PPIA	P62937;F8WE65;C9J5S7;Q567Q0	82;82;82;22
223	Mono	K	1	15	SIYGEKFEDENFILK(1)	-0.43096	KSIYGEKFEDENFILKHTGPGILSMANAGPN	P62937	91	Peptidyl-prolyl cis-trans isomerase A;Peptidyl-prolyl cis-trans isomerase A, N-terminally processed;Peptidyl-prolyl cis-trans isomerase	PPIA	P62937;F8WE65;C9J5S7;Q567Q0	91;91;91;31
224	Mono	K	0.999912	9	VSFELFADK(1)VPK	1.0694	DGEPLGRVSFELFADKVPKTAENFRALSTGE	P62937	28	Peptidyl-prolyl cis-trans isomerase A;Peptidyl-prolyl cis-trans isomerase A, N-terminally processed;Peptidyl-prolyl cis-trans isomerase	PPIA	P62937;F8WE65;C9J5S7	28;28;28
225	Mono	K	0.999995	12	VSFELFADKVPK(1)	0.21448	PLGRVSFELFADKVPKTAENFRALSTGEKGF	P62937	31	Peptidyl-prolyl cis-trans isomerase A;Peptidyl-prolyl cis-trans isomerase A, N-terminally processed;Peptidyl-prolyl cis-trans isomerase	PPIA	P62937;F8WE65;C9J5S7	31;31;31
226	Mono	K	1	16	TITLEVEPSDTIENVK(1)	0.11431	TITLEVEPSDTIENVKAKIQDKEGIPPDQQR	P62979	27	Ubiquitin-40S ribosomal protein S27a;Ubiquitin;40S ribosomal protein S27a;Ubiquitin-60S ribosomal protein L40;Ubiquitin;60S ribosomal protein L40;Polyubiquitin-B;Ubiquitin;Polyubiquitin-C;Ubiquitin	RPS27A;UBB;UBC;UBA52;UBBP4	P62979;J3QTR3;J3QS39;F5H6Q2;F5GYU3;F5H2Z3;F5H265;B4DV12;F5H388;F5H747;F5GXK7;J3QKN0;Q96C32;F5H041;P62987;P0CG47;P0CG48;M0R1V7;J3QLP7;J3QRK5;F5GZ39;J3QSA3	27;27;27;27;27;27;27;27;27;27;27;27;27;27;27;27;27;27;103;103;27;27
227	Mono	K	0.600843	18	TITLEVEPSDTIENVK(0.399)AK(0.601)	0.40682	TLEVEPSDTIENVKAKIQDKEGIPPDQQRLI	P62979	29	Ubiquitin-40S ribosomal protein S27a;Ubiquitin;40S ribosomal protein S27a;Ubiquitin-60S ribosomal protein L40;Ubiquitin;60S ribosomal protein L40;Polyubiquitin-B;Ubiquitin;Polyubiquitin-C;Ubiquitin	RPS27A;UBB;UBC;UBA52;UBBP4	P62979;J3QTR3;J3QS39;F5H6Q2;F5GYU3;F5H2Z3;F5H265;B4DV12;F5H388;F5H747;F5GXK7;J3QKN0;Q96C32;F5H041;P62987;P0CG47;P0CG48;M0R1V7;J3QLP7;J3QRK5;F5GZ39;J3QSA3	29;29;29;29;29;29;29;29;29;29;29;29;29;29;29;29;29;29;105;105;29;29
228	Mono	K	0.9985	3	MDK(0.998)NELVQK(0.002)	1.1383	_____________MDKNELVQKAKLAEQAER	P63104	3	14-3-3 protein zeta/delta	YWHAZ	P63104;E7EX29;E7ESK7;E5RGE1;E5RIR4;E9PD24;E7EVZ2	3;3;3;3;3;3;3
229	Mono	K	0.5	11	YLAEVAAGDDK(0.5)K(0.5)	3.2612	GDYYRYLAEVAAGDDKKGIVDQSQQAYQEAF	P63104	138	14-3-3 protein zeta/delta	YWHAZ	P63104;E7EX29;B0AZS6;P63104-2;B7Z2E6;H0YB80	138;138;61;63;18;23
230	Mono	K	0.5	12	YLAEVAAGDDK(0.5)K(0.5)	3.2612	DYYRYLAEVAAGDDKKGIVDQSQQAYQEAFE	P63104	139	14-3-3 protein zeta/delta	YWHAZ	P63104;E7EX29;B0AZS6;P63104-2;B7Z2E6;H0YB80	139;139;62;64;19;24
231	Mono	K	1	17	EEEIAALVIDNGSGMCK(1)	0.0083967	EEIAALVIDNGSGMCKAGFAGDDAPRAVFPS	P63261	18	Actin, cytoplasmic 2;Actin, cytoplasmic 2, N-terminally processed	ACTG1	P63261;I3L3I0;I3L1U9;I3L4N8;K7EM38;I3L3R2;J3KT65	18;18;18;18;18;18;18
232	Mono	K	1	12	EHALLAYTLGVK(1)	0.59438	GQTREHALLAYTLGVKQLIVGVNKMDSTEPA;GQTREHALLAYTLGVKQLIVGVNKMDSTEPP	P68104	146	Elongation factor 1-alpha 1;Putative elongation factor 1-alpha-like 3;Elongation factor 1-alpha 2	EEF1A1;EEF1A1P5;EEF1A2	P68104;Q5VTE0;Q05639	146;146;146
233	Mono	K	1	11	MDSTEPPYSQK(1)RYEEIVK(1)	0.013007	VGVNKMDSTEPPYSQKRYEEIVKEVSTYIKK	P68104	165	Elongation factor 1-alpha 1;Putative elongation factor 1-alpha-like 3	EEF1A1;EEF1A1P5	P68104;Q5VTE0	165;165
234	Mono	K	1	18	MDSTEPPYSQK(1)RYEEIVK(1)	0.013007	STEPPYSQKRYEEIVKEVSTYIKKIGYNPDT	P68104	172	Elongation factor 1-alpha 1;Putative elongation factor 1-alpha-like 3	EEF1A1;EEF1A1P5	P68104;Q5VTE0	172;172
235	Mono	K	1	13	SGDAAIVDMVPGK(1)PMCVESFSDYPPLGR	-0.49445	FLKSGDAAIVDMVPGKPMCVESFSDYPPLGR	P68104	408	Elongation factor 1-alpha 1;Putative elongation factor 1-alpha-like 3	EEF1A1;EEF1A1P5	P68104;Q5VTE0	408;408
236	Mono	K	0.994426	10	STTTGH(0.006)LIYK(0.994)	0.0016453	HVDSGKSTTTGHLIYKCGGIDKRTIEKFEKE	P68104	30	Elongation factor 1-alpha 1;Putative elongation factor 1-alpha-like 3;Elongation factor 1-alpha 2	EEF1A1;EEF1A1P5;EEF1A2	P68104;Q5VTE0;A6PW80;Q5JR01;Q05639	30;30;30;30;30
237	Mono	K	0.998669	4	TIEK(0.999)FEK(0.001)	0.018669	HLIYKCGGIDKRTIEKFEKEAAEMGKGSFKY	P68104	41	Elongation factor 1-alpha 1;Putative elongation factor 1-alpha-like 3;Elongation factor 1-alpha 2	EEF1A1;EEF1A1P5;EEF1A2	P68104;Q5VTE0;A6PW80;Q5JR01;Q05639	41;41;41;41;41
238	Mono	K	0.987524	7	TIEK(0.012)FEK(0.988)	-0.66482	YKCGGIDKRTIEKFEKEAAEMGKGSFKYAWV	P68104	44	Elongation factor 1-alpha 1;Putative elongation factor 1-alpha-like 3;Elongation factor 1-alpha 2	EEF1A1;EEF1A1P5;EEF1A2	P68104;Q5VTE0;A6PW80;Q5JR01;Q05639	44;44;44;44;44
239	Mono	K	1	24	VETGVLKPGMVVTFAPVNVTTEVK(1)	-0.28328	GMVVTFAPVNVTTEVKSVEMHHEALSEALPG	P68104	290	Elongation factor 1-alpha 1;Putative elongation factor 1-alpha-like 3	EEF1A1;EEF1A1P5	P68104;Q5VTE0	290;290
240	Mono	K	0.999997	16	IHFPLATYAPVISAEK(1)	-0.98284	IHFPLATYAPVISAEKAYHEQLSVAEITNAC	P68363	280	Tubulin alpha-1B chain;Tubulin alpha-4A chain;Tubulin alpha-1A chain;Tubulin alpha-3C/D chain;Tubulin alpha-3E chain	TUBA1B;TUBA4A;TUBA1A;TUBA3C;TUBA3E	P68363;C9JDS9;P68366-2;P68366;Q71U36-2;Q71U36;Q13748;Q13748-2;Q6PEY2	280;127;265;280;245;280;280;280;280
241	Mono	K	0.998828	4	LDH(0.001)K(0.999)FDLMYAKR	0.18618	SNTTAIAEAWARLDHKFDLMYAKRAFVHWYV	P68363	394	Tubulin alpha-1B chain;Tubulin alpha-4A chain;Tubulin alpha-1A chain;Tubulin alpha-3C/D chain	TUBA1B;TUBA4A;TUBA1A;TUBA3C;TUBA8	P68363;P68366-2;P68366;Q71U36-2;Q71U36;Q13748;V9GZ17	394;379;394;359;394;394;152
242	Mono	K	1	11	LDHKFDLMYAK(1)R	-0.32231	EAWARLDHKFDLMYAKRAFVHWYVGEGMEEG	P68363	401	Tubulin alpha-1B chain;Tubulin alpha-4A chain;Tubulin alpha-1A chain;Tubulin alpha-3C/D chain	TUBA1B;TUBA4A;TUBA1A;TUBA3C;TUBA8	P68363;P68366-2;P68366;Q71U36-2;Q71U36;Q13748;V9GZ17	401;386;401;366;401;401;159
243	Mono	K	0.5	7	LSVDYGK(0.5)K(0.5)	-0.5654	GFTSLLMERLSVDYGKKSKLEFSIYPAPQVS	P68363	163	Tubulin alpha-1B chain;Tubulin alpha-4A chain;Tubulin alpha-1A chain;Tubulin alpha-3C/D chain	TUBA1B;TUBA4A;TUBA1A;TUBA3C	P68363;C9JDS9;P68366-2;P68366;C9JEV8;C9JQ00;C9JJQ8;Q71U36-2;Q71U36;Q13748;Q13748-2	163;10;148;163;148;148;186;128;163;163;163
244	Mono	K	0.5	8	LSVDYGK(0.5)K(0.5)	-0.5654	FTSLLMERLSVDYGKKSKLEFSIYPAPQVST	P68363	164	Tubulin alpha-1B chain;Tubulin alpha-4A chain;Tubulin alpha-1A chain;Tubulin alpha-3C/D chain	TUBA1B;TUBA4A;TUBA1A;TUBA3C	P68363;C9JDS9;P68366-2;P68366;C9JEV8;C9JQ00;C9JJQ8;Q71U36-2;Q71U36;Q13748;Q13748-2	164;11;149;164;149;149;187;129;164;164;164
245	Mono	K	0.999813	12	QLFHPEQLITGK(1)	-0.069942	GPYRQLFHPEQLITGKEDAANNYARGHYTIG;GTYRQLFHPEQLITGKEDAANNYARGHYTIG	P68363	96	Tubulin alpha-1B chain;Tubulin alpha-4A chain;Tubulin alpha-1A chain;Tubulin alpha-3C/D chain;Tubulin alpha-3E chain	TUBA1B;TUBA4A;TUBA1A;TUBA3C;TUBA3E	P68363;P68366-2;P68366;C9JEV8;C9JQ00;C9JJQ8;C9JDL2;Q71U36-2;Q71U36;Q13748;Q13748-2;Q6PEY2	96;81;96;81;81;119;98;61;96;96;96;96
246	Mono	K	1	18	VGINYQPPTVVPGGDLAK(1)	0.82798	INYQPPTVVPGGDLAKVQRAVCMLSNTTAIA	P68363	370	Tubulin alpha-1B chain;Tubulin alpha-4A chain;Tubulin alpha-1A chain;Tubulin alpha-3C/D chain;Tubulin alpha-3E chain	TUBA1B;TUBA4A;TUBA1A;TUBA3C;TUBA3E;TUBA8	P68363;P68366-2;P68366;Q71U36-2;Q71U36;Q13748;Q13748-2;Q6PEY2;V9GZ17	370;355;370;335;370;370;370;370;128
247	Mono	K	1	7	EIAQDFK(1)TDLR	-0.97027	KLPFQRLVREIAQDFKTDLRFQSSAVMALQE	Q71DI3	80	Histone H3.2;Histone H3.1t;Histone H3.1;Histone H3;Histone H3.3	HIST2H3A;HIST3H3;HIST1H3A;H3F3B;H3F3A	Q71DI3;Q16695;P68431;K7EK07;P84243;K7EMV3;B4DEB1;K7ES00	80;80;80;80;80;80;80;80
248	Mono	K	1	1	K(1)SAPATGGVK	0.98003	GGKAPRKQLATKAARKSAPATGGVKKPHRYR	Q71DI3	28	Histone H3.2;Histone H3.1t;Histone H3.1;Histone H3	HIST2H3A;HIST3H3;HIST1H3A;HIST2H3PS2	Q71DI3;Q16695;P68431;Q5TEC6	28;28;28;28
249	Mono	K	0.959501	9	SAPATGGVK(0.96)K(0.96)PH(0.081)R	0.35853	ATKAARKSAPATGGVKKPHRYRPGTVALREI	Q71DI3	37	Histone H3.2;Histone H3.1t;Histone H3.1;Histone H3	HIST2H3A;HIST3H3;HIST1H3A;HIST2H3PS2	Q71DI3;Q16695;P68431;Q5TEC6	37;37;37;37
250	Mono	K	0.999999	1	K(1)STGGKAPR	0.26425	______MARTKQTARKSTGGKAPRKQLATKA	Q71DI3	10	Histone H3.2;Histone H3.1t;Histone H3.1;Histone H3;Histone H3.3;Histone H3.3C	HIST2H3A;HIST3H3;HIST1H3A;H3F3B;H3F3A;H3F3C;HIST2H3PS2	Q71DI3;Q16695;P68431;K7EK07;P84243;K7EMV3;B4DEB1;K7ES00;Q6NXT2;Q5TEC6;K7EP01	10;10;10;10;10;10;10;10;10;10;10
251	Mono	K	1	7	RVTIMPK(1)	-0.26406	TNLCAIHAKRVTIMPKDIQLARRIRGERA__;TNLCAIHAKRVTIMPKDIQLVSRIRGERA__	Q71DI3	123	Histone H3.2;Histone H3.1t;Histone H3.1;Histone H3;Histone H3.3;Histone H3.3C	HIST2H3A;HIST3H3;HIST1H3A;H3F3B;H3F3A;H3F3C;HIST2H3PS2	Q71DI3;Q16695;P68431;K7EK07;P84243;Q6NXT2;Q5TEC6	123;123;123;123;123;122;123
252	Mono	K	0.959501	10	SAPATGGVK(0.96)K(0.96)PH(0.081)R	0.35853	TKAARKSAPATGGVKKPHRYRPGTVALREIR	Q71DI3	38	Histone H3.2;Histone H3.1t;Histone H3.1;Histone H3	HIST2H3A;HIST3H3;HIST1H3A;HIST2H3PS2	Q71DI3;Q16695;P68431;Q5TEC6	38;38;38;38
253	Mono	K	1	4	GMDK(1)ILLSSGR	-0.27988	IGDLVKSTLGPKGMDKILLSSGRDASLMVTN	P78371	50	T-complex protein 1 subunit beta	CCT2	P78371;F5GWF6;F8VQ14	50;50;50
254	Mono	K	1	11	SHTILLVQPTK(1)	-0.44501	____MSHTILLVQPTKRPEGRTYADYESVNE	P84090	12	Enhancer of rudimentary homolog	ERH	P84090;G3V279	12;12
255	Mono	K	1	17	TYADYESVNECMEGVCK(1)	-0.46251	YADYESVNECMEGVCKMYEEHLKRMNPNSPS	P84090	34	Enhancer of rudimentary homolog	ERH	P84090;G3V279	34;34
256	Mono	K	1	10	TLQIFNIEMK(1)	0.36889	ALKAGKTLQIFNIEMKSKMKAHTMTDDVTFW	Q00610-2	96	Clathrin heavy chain 1;Clathrin heavy chain 2	CLTC;CLTCL1	Q00610-2;Q00610;J3KS13;P53675-2;P53675;J3KR87;J3KSQ2;F5H5N6	96;96;96;96;96;96;100;117
257	Mono	K	0.94645	1	K(0.946)AEVEGK(0.053)DLPEHAVLK	0.23085	VVCPKDEDYKQRTQKKAEVEGKDLPEHAVLK	Q00839-2	601	Heterogeneous nuclear ribonucleoprotein U	HNRNPU	Q00839-2;Q00839	601;620
258	Mono	K	0.5	7	MMVAGFK(0.5)K(0.5)	-0.51604	LGTNTIMDKMMVAGFKKQMADTGKLNTLLQR	Q00839-2	524	Heterogeneous nuclear ribonucleoprotein U	HNRNPU	Q00839-2;Q00839	524;543
259	Mono	K	0.5	8	MMVAGFK(0.5)K(0.5)	-0.51604	GTNTIMDKMMVAGFKKQMADTGKLNTLLQRA	Q00839-2	525	Heterogeneous nuclear ribonucleoprotein U	HNRNPU	Q00839-2;Q00839	525;544
260	Mono	K	1	4	VTEK(1)IPVR	-0.79547	GVSKGKVCFEMKVTEKIPVRHLYTKDIDIHE	Q00839-2	324	Heterogeneous nuclear ribonucleoprotein U	HNRNPU	Q00839-2;Q00839;Q5RI18	324;343;120
261	Mono	K	0.996933	10	IFAPNH(0.003)VVAK(0.997)	0.9275	PLYRMRIFAPNHVVAKSRFWYFVSQLKKMKK	Q02543	41	60S ribosomal protein L18a	RPL18A	Q02543;M0R1A7;M0R117;M0R3D6	41;12;41;12
262	Mono	K	1	17	GFGHIGIAVPDVYSACK(1)	-1.3488	FGHIGIAVPDVYSACKRFEELGVKFVKKPDD	Q04760-2	125	Lactoylglutathione lyase	GLO1	Q04760-2;Q04760	125;140
263	Mono	K	1	8	GLFIIDDK(1)GILR	0.33114	ADEGISFRGLFIIDDKGILRQITVNDLPVGR;EDSGHTLRGLFIIDDKGILRQITLNDLPVGR	Q06830	136	Peroxiredoxin-1;Peroxiredoxin-4	PRDX1;PRDX4	Q06830;Q13162;H7C3T4	136;208;86
264	Mono	K	0.999999	9	IGHPAPNFK(1)	-0.069796	MSSGNAKIGHPAPNFKATAVMPDGQFKDISL	Q06830	16	Peroxiredoxin-1	PRDX1	Q06830	16
265	Mono	K	1	10	LGGIGQFLAK(1)	0.22597	SIKLLRLGGIGQFLAKAIEPPPLDAVIEAEH	Q08211	819	ATP-dependent RNA helicase A	DHX9	Q08211	819
266	Mono	K	1	3	ADK(1)EAAFDDAVEER	0.81461	____________MADKEAAFDDAVEERVINE	Q09028-3	4	Histone-binding protein RBBP4	RBBP4	Q09028-3;Q09028;E9PNS2;E9PIC4;E9PNS6	4;4;4;4;4
267	Mono	K	0.5	9	LAAFGQLH(0.5)K(0.5)	0.46376	SAQHALRLAAFGQLHKVLGMDPLPSKMPKKP	Q12906	332	Interleukin enhancer-binding factor 3	ILF3	Q12906;Q12906-7;Q12906-5;Q12906-4;Q12906-2;Q12906-6;Q12906-3	332;332;332;332;332;332;332
268	Mono	K	0.998487	11	LNQLK(0.002)PGLQYK(0.998)	1.8721	NALMRLNQLKPGLQYKLVSQTGPVHAPIFTM	Q12906	419	Interleukin enhancer-binding factor 3	ILF3	Q12906;Q12906-7;Q12906-5;Q12906-4;Q12906-2;Q12906-6;Q12906-3	419;419;419;419;419;419;419
269	Mono	K	1	11	RAPVPVR(1)GGPK(1)	-0.78641	ANKKKRAPVPVRGGPKFAAKPHNPGFGMGGP	Q12906	613	Interleukin enhancer-binding factor 3	ILF3	Q12906;Q12906-7;Q12906-5;Q12906-4;Q12906-2;Q12906-6;Q12906-3	613;617;613;617;613;617;613
270	Mono	K	1	8	MAILQIMK(1)	0.042399	KRVQVDVKMAILQIMKELNKRGRVLVNDAQK	Q13263-2	222	Transcription intermediary factor 1-beta	TRIM28	Q13263-2;Q13263;M0R3C0	222;304;170
271	Mono	K	0.999959	3	DNK(1)ILCNKCTTR	-1.2296	CLHPLANETFVAKDNKILCNKCTTREDSPKC	Q13642-1	86	Four and a half LIM domains protein 1	FHL1	Q13642-1;Q5JXI0;Q5JXH9;Q5JXH8;Q5JXH7;Q5JXI3;Q5JXI8;Q13642-3;Q13642-5;Q13642-4;Q13642;Q5JXI2	86;86;86;86;86;86;86;86;102;115;86;102
272	Mono	K	1	4	AQYK(1)GAASEAGR	0.87277	___________MAQYKGAASEAGRAMHLMKK	Q14320	5	Protein FAM50A	FAM50A	Q14320	5
273	Mono	K	1	13	ELAGALAYIMDNK(1)	2.3553	LKKELAGALAYIMDNKLAQIEGVVPFGANNA	Q14527	126	Helicase-like transcription factor	HLTF	Q14527	126
274	Mono	K	1	16	AITIAGVPQSVTECVK(1)	-1.6411	AITIAGVPQSVTECVKQICLVMLETLSQSPQ	Q15365	160	Poly(rC)-binding protein 1	PCBP1	Q15365	160
275	Mono	K	1	14	LVVPATQCGSLIGK(1)	-0.33661	LRLVVPATQCGSLIGKGGCKIKEIRESTGAQ	Q15365	115	Poly(rC)-binding protein 1	PCBP1	Q15365	115
276	Mono	K	1	13	IITLAGPTNAIFK(1)	-0.1726	PERIITLAGPTNAIFKAFAMIIDKLEEDISS	Q15366-6	70	Poly(rC)-binding protein 2	PCBP2	Q15366-6;Q15366-3;B4DLC0;Q15366;Q15366-2;Q15366-7;Q15366-4;F8VZX2;B4DXP5;Q15366-5;H3BRU6;F8W0G4;F8VXH9;F8W1G6	70;70;70;70;70;70;70;70;70;70;51;70;62;67
277	Mono	K	1	14	LVVPASQCGSLIGK(1)	-1.9567	LRLVVPASQCGSLIGKGGCKIKEIRESTGAQ	Q15366-6	115	Poly(rC)-binding protein 2;Poly(rC)-binding protein 3	PCBP2;PCBP3	Q15366-6;Q15366-3;B4DLC0;Q15366;Q15366-2;Q15366-7;Q15366-4;F8VZX2;B4DXP5;Q15366-5;H3BRU6;F8W0G4;F8VXH9;E9PFP8;P57721-5;P57721-4;P57721;F8W1G6;J3QT27;P57721-2;P57721-3;H3BND9	115;115;115;115;115;115;115;115;115;115;96;115;107;115;147;147;147;112;123;147;147;55
278	Mono	K	1	11	HQGVMVGMGQK(1)	-0.40049	IGRPRHQGVMVGMGQKDCYVGDEAQSKRGVL	Q562R1	51	Beta-actin-like protein 2	ACTBL2	Q562R1	51
279	Mono	K	1	19	GSYGDLGGPIITTQVTIPK(1)	1.2351	GDLGGPIITTQVTIPKDLAGSIIGKGGQRIK	Q5T6W5	361	Heterogeneous nuclear ribonucleoprotein K	HNRNPK	Q5T6W5;P61978-3;P61978;P61978-2;Q5T6W2;S4R359	361;372;396;396;372;40
280	Mono	K	1	12	IILDLISESPIK(1)	-0.067103	ECIKIILDLISESPIKGRAQPYDPNFYDETY	Q5T6W5	184	Heterogeneous nuclear ribonucleoprotein K	HNRNPK	Q5T6W5;P61978-3;P61978;P61978-2;Q5T6W2;Q5T6W1	184;195;219;219;195;150
281	Mono	K	1	15	LLIHQSLAGGIIGVK(1)	0.27436	RLLIHQSLAGGIIGVKGAKIKELRENTQTTI	Q5T6W5	128	Heterogeneous nuclear ribonucleoprotein K	HNRNPK	Q5T6W5;P61978-3;P61978;P61978-2;Q5T6W2;Q5T6W1	128;139;163;163;139;94
282	Mono	K	0.975775	7	EIAQEFK(0.976)TDLR(0.024)	1.9147	KLPFQRLVREIAQEFKTDLRFQSSAVMALQE	Q5TEC6	80	Histone H3	HIST2H3PS2	Q5TEC6	80
283	Mono	K	1	6	ARLQEK(1)R	0.1913	SVICIQRWFRARLQEKRFIQKYHSIKKIEHE	Q5VYL4	823	Abnormal spindle-like microcephaly-associated protein	ASPM	Q5VYL4;Q8IZT6-2;Q8IZT6	823;1573;3158
284	Mono	K	1	5	REMLK(1)DPFVR	2.3626	RVSEEQQKQQRREMLKDPFVRSKLISPPTNF	Q6DT37	1428	Serine/threonine-protein kinase MRCK gamma	CDC42BPG	Q6DT37	1428
285	Mono	K	1	6	AEYQR(0.155)K(1)QQFWDSVR(0.845)	-0.072103	VEFSEAEFSRAEYQRKQQFWDSVRLALFTLA	Q6ZWK6	21	Transmembrane protease serine 11F	TMPRSS11F	Q6ZWK6	21
286	Mono	K	0.714601	9	IMDINK(0.285)SCK(0.715)NEER	-1.8323	NKYICEKIMDINKSCKNEERREAKYNLQ___	Q7L4P6-2	240	BEN domain-containing protein 5	BEND5	Q7L4P6-2;Q7L4P6	240;409
287	Mono	K	0.999975	3	DFK(1)ITCGKVDAVDLR(1)	0.706	TMNGLRLALREQKDFKITCGKVDAVDLREYV	Q7Z3T8	1367	Zinc finger FYVE domain-containing protein 16	ZFYVE16	Q7Z3T8	1367
288	Mono	K	1	3	QFK(1)RTGETR	-0.45711	EQCTREGKCMWTRQFKRTGETRRILSVQPTY	Q7Z7M0-2	1950	Multiple epidermal growth factor-like domains protein 8	MEGF8	Q7Z7M0-2;Q7Z7M0	1950;2017
289	Mono	K	1	10	KESYSIYVYK(1)	-1.587	KRKRGRKESYSIYVYKVLKQVHPDTGISSKA	Q8N257	44	Histone H2B type 3-B	HIST3H2BB	Q8N257	44
290	Mono	K	1	1	K(1)ESYSIYVYK	-0.10207	TKAQKKDGKKRKRGRKESYSIYVYKVLKQVH	Q8N257	35	Histone H2B type 3-B	HIST3H2BB	Q8N257	35
291	Mono	K	0.963605	5	PSIK(0.03)K(0.964)ETLLK(0.007)	-0.023915	IFKESLDLQEKPSIKKETLLKKPLALKMSTI	Q8WWL7	906	G2/mitotic-specific cyclin-B3	CCNB3	Q8WWL7	906
292	Mono	K	0.499999	8	GSCR(0.5)LSWK(0.5)MPDDDGGDR	2.4994	LKVSDITRGSCRLSWKMPDDDGGDRIKGYVI	Q8WZ42-3	9436	Titin	TTN	Q8WZ42-3;Q8WZ42-10;Q8WZ42-9;Q8WZ42-5;Q8WZ42-11;Q8WZ42-4;Q8WZ42-7;Q8WZ42-2;Q8WZ42;Q8WZ42-8;Q8WZ42-13;Q8WZ42-12	9436;9561;9628;15410;15933;15955;16125;16768;16860;16985;16994;18501
293	Mono	K	1	9	QSGYGGQTK(1)PIFR	1.0807	RRRYDRKQSGYGGQTKPIFRKKAKTTKKIVL	Q969Q0	53	60S ribosomal protein L36a-like;60S ribosomal protein L36a	RPL36AL;RPL36A;RPL36A-HNRNPH2	Q969Q0;J3KQN4;P83881;H7BZ11;H0Y5B4;H7BY91;H0Y3V9	53;89;53;64;72;63;64
294	Mono	K	1	7	ALVILAK(1)	0.24097	____MASKRALVILAKGAEEMETVIPVDVMR	Q99497	12	Protein DJ-1	PARK7	Q99497;K7ELW0	12;12
295	Mono	K	1	10	MMPTPVILLK(1)	0.15745	______MMPTPVILLKEGTDSSQGIPQLVSN	Q99832	10	T-complex protein 1 subunit eta	CCT7	Q99832;F8WBP8	10;10
296	Mono	K	0.997251	8	TETGTPWK(0.997)TK(0.003)	-0.041785	QRTEERHRTETGTPWKTKYFIKEGDGWVYHK	Q9BXB4	719	Oxysterol-binding protein-related protein 11	OSBPL11	Q9BXB4	719
297	Mono	K	1	11	EITALAPSIMK(1)	0.88723	HRMQKEITALAPSIMKIKIIAPPKRKYSVWV	Q9BYX7	326	Putative beta-actin-like protein 3	POTEKP	Q9BYX7	326
298	Mono	K	1	3	ELK(1)LENH(1)QENSR	1.1376	KEERQKKRKREKKELKLENHQENSRNQKPKK	Q9NX58	207	Cell growth-regulating nucleolar protein	LYAR	Q9NX58	207
299	Mono	K	0.999996	4	HIQK(1)MQK(1)	-1.2864	TSASLLIHSLRRHIQKMQKNATGFWNPQTEA	Q9NYW5	209	Taste receptor type 2 member 4	TAS2R4	Q9NYW5	209
300	Mono	K	0.999996	7	HIQK(1)MQK(1)	-1.2864	SLLIHSLRRHIQKMQKNATGFWNPQTEAHVG	Q9NYW5	212	Taste receptor type 2 member 4	TAS2R4	Q9NYW5	212
301	Mono	K	0.5	3	EDK(0.5)GQH(0.5)GMILGK	0.77614	NITKEVGKGNEGKEDKGQHGMILGKGNVKTQ	Q9NZW4	402	Dentin sialophosphoprotein;Dentin phosphoprotein;Dentin sialoprotein	DSPP	Q9NZW4	402
302	Mono	K	1	5	PPNSK(1)LER	2.6368	LNGANMLETVKPPNSKLERFTYHHELRRVPY	Q9P109	261	Beta-1,3-galactosyl-O-glycosyl-glycoprotein beta-1,6-N-acetylglucosaminyltransferase 4	GCNT4	Q9P109	261
303	Mono	K	1	5	H(1)MITK(1)VRR	2.239	YRMFTNNTCLKHMITKVRRDTHHFERYQHNR	Q9P2P5-2	600	E3 ubiquitin-protein ligase HECW2	HECW2	Q9P2P5-2;Q9P2P5	600;956
304	Mono	K	1	8	SYARLFSK(1)SIETLR	-0.91043	DQQVLDVKSYARLFSKSIETLRVHLAEKGDG	Q9UBT2	324	SUMO-activating enzyme subunit 2	UBA2	Q9UBT2;B3KWB9;K7ESK7	324;228;61
305	Mono	K	1	12	ALRYPMAVGLNK(1)	0.31787	___MALRYPMAVGLNKGHKVTKNVSKPRHSR	Q9Y3U8	13	60S ribosomal protein L36	RPL36	Q9Y3U8;J3QSB5;J3KTD3	13;13;13
306	Mono	R	0.858053	7	AGAQMQR(0.858)DIER(0.142)	3.4027	LPRALERARAGAQMQRDIEREAHRQAALARP	A0A044PY82	209	Uncharacterized protein LOC113230	MIR1199	A0A044PY82;Q96FF7	209;67
307	Mono	R	0.48395	9	TMGH(1)QSASR(0.484)R(0.484)R(0.032)	-2.4225	VATSQPKTMGHQSASRRRPGVARGHVFATGS	K7ERC9	258			K7ERC9;A6NFD7;A6NDL0	258;258;258
308	Mono	R	0.48395	10	TMGH(1)QSASR(0.484)R(0.484)R(0.032)	-2.4225	ATSQPKTMGHQSASRRRPGVARGHVFATGSL	K7ERC9	259			K7ERC9;A6NFD7;A6NDL0	259;259;259
309	Mono	R	0.999969	1	R(1)WADH(1)EVR	0.19441	QGWQVAERQHHFRRRRWADHEVRRSRSSW__	A6NFL3	104			A6NFL3	104
310	Mono	R	0.748212	4	SSFR(0.748)QPR(0.252)SLSGSPK	0.06138	PGKKVQTLPSWKSSFRQPRSLSGSPKGGGSS	D6R9V6	266	Rho GTPase-activating protein 22	ARHGAP22	D6R9V6;A6NJ38;A6NHM7;Q7Z5H3-4;Q7Z5H3-3;Q7Z5H3;Q7Z5H3-5;Q7Z5H3-2	266;274;324;229;343;433;439;449
311	Mono	R	0.925577	8	EERQH(0.005)SLR(0.926)MGSSVR(0.069)	0.11039	HRQEEEQKEERQHSLRMGSSVRRRTFRSSEE	A6NIU4	41	Myomesin-3	MYOM3	A6NIU4;A6NI63;Q5VTT5-2;Q5VTT5	41;41;41;41
312	Mono	R	0.999998	1	R(1)GGFNTFR	-0.18617	GGMKDDRRDRYSAGKRGGFNTFRDRENYDRG	B4DLW8	423	Probable ATP-dependent RNA helicase DDX5	DDX5	B4DLW8;P17844;J3KTA4	423;502;502
313	Mono	R	0.747903	9	SGYSSDR(0.003)DR(0.748)GR(0.249)	-0.61477	______MSGYSSDRDRGRDRGFGAPRFGGSR	B4DLW8	10	Probable ATP-dependent RNA helicase DDX5	DDX5	B4DLW8;P17844;J3QRQ7;J3QR02;J3KRX8;X6RLV5;J3QKN9;J3QS79	10;10;10;10;10;10;10;10
314	Mono	R	1	1	R(1)GGH(1)QNSYKPY	-0.68601	GRGGDQQSGYGKVSRRGGHQNSYKPY_____	H0YA96	200	Heterogeneous nuclear ribonucleoprotein D0	HNRNPD	H0YA96;B4DTC3;Q14103-4;Q14103-3;Q14103-2;Q14103;F5H6R6	200;293;277;296;326;345;191
315	Mono	R	0.976949	9	MYEEQSQDR(0.977)R(0.023)	3.3724	FKEGKERMYEEQSQDRRNLTKLSLIFSHMLA	B5MC15	140	E3 ubiquitin-protein ligase CBL-B	CBLB	B5MC15;E7ENW2;Q13191-3;Q13191-2;Q13191	140;162;140;140;140
316	Mono	R	0.666666	3	H(0.667)KR(0.667)MH(0.667)ADCR	-2.4472	CHKSYTQFSNLCRHKRMHADCRTQIKCKDCG	E7EUL6	208	MDS1 and EVI1 complex locus protein EVI1;PR domain zinc finger protein 16	MECOM;PRDM16	E7EUL6;H0YA13;D6RFY3;D6RDW0;E7EQ57;D3YTA5;F8WEV3;Q03112-5;Q03112-6;Q03112;Q9HAZ2-4;Q03112-4;Q03112-3;Q9HAZ2-2;Q9HAZ2-3;Q9HAZ2	208;223;415;415;396;414;414;208;209;208;230;273;396;414;415;414
317	Mono	R	0.959735	13	EVYQQQQYGSGGR(0.96)GNR(0.04)	-0.20287	QPKEVYQQQQYGSGGRGNRNRGNRGSGGGQG	D6R9P3	245	Heterogeneous nuclear ribonucleoprotein A/B	HNRNPAB	D6R9P3;D6RD18;D6RBZ0;Q99729-3;Q99729-2;Q99729-4;Q99729	245;245;245;245;245;246;245
318	Mono	R	1	1	R(1)GGH(1)QNNYKPY	0.82378	SGGGQGSTNYGKSQRRGGHQNNYKPY_____	D6R9P3	270	Heterogeneous nuclear ribonucleoprotein A/B	HNRNPAB	D6R9P3;D6RD18;D6RBZ0;Q99729-3;Q99729-2;Q99729-4;Q99729	270;273;317;275;322;276;322
319	Mono	R	1	8	PVGVVVPR(1)	1.1561	GRGGVTARPVGVVVPRGTPTPRGVLSTRGPV	H0YAQ1	135	KH domain-containing, RNA-binding, signal transduction-associated protein 3	KHDRBS3	H0YAQ1;H0YAQ3;E5RJZ9;O75525-2;O75525	135;145;192;220;220
320	Mono	R	0.902782	10	VHER(0.23)SH(0.867)TGDR(0.903)	-0.49184	TAHHLKVHERSHTGDRPYQCEHAGCGKAFAT	E7EN86	237	Zinc finger protein 143	ZNF143	E7EN86;P52747-2;P52747-3;P52747	237;234;264;265
321	Mono	R	0.976331	5	DFSLR(0.976)MEKYR(0.024)	-1.2951	KCVTAVDKRYRDFSLRMEKYRTSLEKALGIS	F5H228	1185	Triple functional domain protein	TRIO	F5H228;E7EWP2;E7EPJ7;O75962-5;O75962-2;O75962-4;O75962	1185;1175;967;1234;1234;1175;1234
322	Mono	R	0.876826	5	EKALR(0.877)PEVER(0.123)	0.57285	WGKLIIAMLEREKALRPEVERLEMLQQIANR	E7ERU0	377	Dystonin	DST	E7ERU0;E9PHM6;F8W9J4;E7ERU2;E9PEB9;Q03001;Q5T0V7;E7ETB9;F6QMI7;Q03001-13	377;377;377;377;555;377;555;417;377;493
323	Mono	R	1	8	MNTPSQPR(1)QH(1)FYPSR	0.61028	________MNTPSQPRQHFYPSRAQPPSSAA	E7EUU4	8	Eukaryotic translation initiation factor 4 gamma 1	EIF4G1	E7EUU4;Q04637-8;C9J2Z7;C9JIH5;C9JHW9;C9JWH9;Q04637-3;Q04637	8;48;48;8;8;48;8;48
324	Mono	R	1	9	TEEVGKNER(1)NK	3.3088	CSRICQKTEEVGKNERNKGTAHKVRQRWQWG	E7EW86	771			E7EW86	771
325	Mono	R	0.962025	8	EFKEMENR(0.962)R(0.038)	-2.5324	YWSPLLNKEFKEMENRRKKQLLRDLSGLQGM	E9PDH4	1045	1-phosphatidylinositol 3-phosphate 5-kinase	PIKFYVE	E9PDH4;Q9Y2I7	1045;1101
326	Mono	R	0.863965	8	SVAFAAPR(0.864)QR(0.136)	0.40044	_______MSVAFAAPRQRGKGEITPAAIQKV	F5GWN1	9	Protein SSXT	CD63;SS18	F5GWN1;J3KRP6;J3QS72;X6R3J2;J3QQM2;J3KT74;J3QQW2;Q15532-2;Q15532	9;9;9;9;9;9;9;9;9
327	Mono	R	0.499992	3	GGR(0.5)GR(0.5)GGSGGGGGGGGGGYNR	-0.19841	GGGGSGGYGQQDRGGRGRGGSGGGGGGGGGG	H3BPE7	216	RNA-binding protein FUS	FUS	H3BPE7;P35637-2;P35637;H3BNZ4	216;215;216;216
328	Mono	R	0.499992	5	GGR(0.5)GR(0.5)GGSGGGGGGGGGGYNR	-0.19841	GGSGGYGQQDRGGRGRGGSGGGGGGGGGGYN	H3BPE7	218	RNA-binding protein FUS	FUS	H3BPE7;P35637-2;P35637;H3BNZ4	218;217;218;218
329	Mono	R	1	3	MLR(1)DTLYYMK(1)	2.1333	TSFSDPLYLTMFKMLRDTLYYMKDLPTSFVK	J3KN10	382	Phosphatidylinositol 4-kinase alpha	PI4KA	J3KN10;P42356	382;324
330	Mono	R	0.999999	1	R(1)FALAWWER	-2.866	_______MQPWQCLRRFALAWWERTAEGRAR	J3KT41	9			J3KT41	9
331	Mono	R	0.978701	7	TVILYK(1)R(0.979)FGR(0.021)	-0.54298	QFLVTDSGRTVILYKRFGRTRWFTPVIPELR	J3QLQ6	48		NOL11	J3QLQ6	48
332	Mono	R	1	18	ALSEVSGENQKGPAATER(1)	-3.5481	SEVSGENQKGPAATERAAATIVAMAGTGPGK	M0R3C1	53	Volume-regulated anion channel subunit LRRC8E	LRRC8E	M0R3C1;M0QZ48;Q6NSJ5	53;182;182
333	Mono	R	1	3	ASR(1)GGGNH(1)QNNYQPY	-0.82562	RGRGRGQQSTYGKASRGGGNHQNNYQPY___;YADYSGQQSTYGKASRGGGNHQNNYQPY___	O14979-3	232	Heterogeneous nuclear ribonucleoprotein D-like	HNRNPDL	O14979;O14979-3;O14979-2	408;232;289
334	Mono	R	1	11	QEMASASSSQR(1)GR(1)	-0.70276	KALSKQEMASASSSQRGRSGSGNFGGGRGGG	P09651-2	194	Heterogeneous nuclear ribonucleoprotein A1;Heterogeneous nuclear ribonucleoprotein A1, N-terminally processed;Heterogeneous nuclear ribonucleoprotein A1-like 2	HNRNPA1;HNRNPA1L2	P09651-2;P09651;F8W6I7;P09651-3;H0YH80;F8VZ49;Q32P51	194;194;194;194;65;213;194
335	Mono	R	1	13	QEMASASSSQR(1)GR(1)	-0.70276	LSKQEMASASSSQRGRSGSGNFGGGRGGGFG	P09651-2	196	Heterogeneous nuclear ribonucleoprotein A1;Heterogeneous nuclear ribonucleoprotein A1, N-terminally processed;Heterogeneous nuclear ribonucleoprotein A1-like 2	HNRNPA1;HNRNPA1L2	P09651-2;P09651;F8W6I7;P09651-3;H0YH80;F8VZ49;Q32P51	196;196;196;196;67;215;196
336	Mono	R	1	9	AGLQFPVGR(1)	-0.002388	AKSRSSRAGLQFPVGRVHRLLRKGNYAERVG;AKTRSSRAGLQFPVGRVHRLLRKGNYAERVG;AVSRSQRAGLQFPVGRIHRHLKTRTTSHGRV	Q99878	30	Histone H2A.V;Histone H2A.Z;Histone H2A;Histone H2A type 1-J;Histone H2A type 1-H;Histone H2A.J;Histone H2A type 2-C;Histone H2A type 2-A;Histone H2A type 1;Histone H2A type 1-D;Histone H2A type 1-A;Histone H2AX;Histone H2A type 2-B;Histone H2A type 1-C;Histone H2A type 3;Histone H2A type 1-B/E	H2AFV;H2AFZ;HIST1H2AJ;HIST1H2AH;H2AFJ;HIST2H2AC;HIST2H2AA3;HIST1H2AG;HIST1H2AD;HIST1H2AA;H2AFX;HIST2H2AB;HIST1H2AC;HIST3H2A;HIST1H2AB	Q71UI9;P0C0S5;C9J0D1;Q71UI9-2;Q71UI9-5;Q99878;Q96KK5;Q9BTM1;Q16777;Q6FI13;P0C0S8;P20671;Q9BTM1-2;Q96QV6;P16104;Q8IUE6;Q93077;Q7L7L0;P04908	32;32;32;32;32;30;30;30;30;30;30;30;30;30;30;30;30;30;30
337	Mono	R	0.999999	2	QR(1)GVSH(1)AMGGR	-1.6218	TTLRQGVRGRQFNRQRGVSHAMGGRGGINRG	P12270	2345	Nucleoprotein TPR	TPR	P12270	2345
338	Mono	R	1	1	R(1)AEVDTYCR	1.0078	AAEHWNSQKDLLERRRAEVDTYCRHNYGVVE	Q9GIY3	101	HLA class II histocompatibility antigen, DRB1-14 beta chain;HLA class II histocompatibility antigen, DR beta 4 chain	HLA-DRB1;HLA-DRB4	Q9GIY3;P13762	101;101
339	Mono	R	1	3	SGR(1)GGNFGFGDSR	-0.30345	LSRQEMQEVQSSRSGRGGNFGFGDSRGGGGN	P22626	203	Heterogeneous nuclear ribonucleoproteins A2/B1	HNRNPA2B1	P22626;P22626-2	203;191
340	Mono	R	0.87191	12	GMGPGTPAGYGR(0.872)GR(0.128)	0.40851	QGPRGMGPGTPAGYGRGREEYEGPNKKPRF_	P23246	693	Splicing factor, proline- and glutamine-rich	SFPQ	P23246	693
341	Mono	R	1	1	R(1)SAPSGPVR	2.7864	VKRGPPPRSGGPPPKRSAPSGPVRSSSGMGG	P38159	164	RNA-binding motif protein, X chromosome;RNA-binding motif protein, X chromosome, N-terminally processed	RBMX	P38159;P38159-2;H0Y6E7;H3BT71;B3KRG5;H3BUY5	164;151;166;164;29;36
342	Mono	R	1	8	SAPSGPVR(1)SSSGMGGR	-1.4407	SGGPPPKRSAPSGPVRSSSGMGGRAPVSRGR	P38159	172	RNA-binding motif protein, X chromosome;RNA-binding motif protein, X chromosome, N-terminally processed	RBMX	P38159;P38159-2;H0Y6E7;H3BT71;B3KRG5;H3BUY5	172;159;174;172;37;44
343	Mono	R	0.566865	10	ERLDDWDR(0.433)ER(0.567)	-0.16596	NAPMERERLDDWDRERYWRECERDYQDDTLE	P49750-3	1030	YLP motif-containing protein 1	YLPM1	P49750-3;P49750;P49750-4;H0YIQ2	1030;1030;1225;778
344	Mono	R	1	7	PENVAPR(1)	0.28568	________MPENVAPRSGATAGAAGGRGKGA	P50991	8	T-complex protein 1 subunit delta	CCT4	P50991;P50991-2	8;8
345	Mono	R	0.499977	1	R(0.5)R(0.5)IEVNVELR	1.0244	HRFKNKGKDSTEMRRRRIEVNVELRKAKKDD	P52292	30	Importin subunit alpha-1	KPNA2;POU2F2	P52292;J3QLL0;J3KS65	30;30;30
346	Mono	R	0.499977	2	R(0.5)R(0.5)IEVNVELR	1.0244	RFKNKGKDSTEMRRRRIEVNVELRKAKKDDQ	P52292	31	Importin subunit alpha-1	KPNA2;POU2F2	P52292;J3QLL0;J3KS65	31;31;31
347	Mono	R	0.977199	9	GGGFGAH(1)GR(0.977)GR(0.023)	-0.53616	KSARGTRGGGFGAHGRGRSYSRGGGDQGYGS	P98179	99	Putative RNA-binding protein 3	RBM3	P98179	99
348	Mono	R	1	10	PGGYGYGYGR(1)	0.71777	RYYDSRPGGYGYGYGRSRDYNGRNQGGYDRY	P98179	131	Putative RNA-binding protein 3	RBM3	P98179	131
349	Mono	R	0.784657	1	R(0.785)GNMPQR(0.215)GGGGGGSGGIGYPYPR	-0.24452	NFRGGAPGNRGGYNRRGNMPQRGGGGGGSGG	Q00839-2	714	Heterogeneous nuclear ribonucleoprotein U	HNRNPU	Q00839-2;Q00839	714;733
350	Mono	R	0.999989	7	RAPVPVR(1)GGPK(1)	-0.78641	LALDANKKKRAPVPVRGGPKFAAKPHNPGFG	Q12906	609	Interleukin enhancer-binding factor 3	ILF3	Q12906;Q12906-7;Q12906-5;Q12906-4;Q12906-2;Q12906-6;Q12906-3	609;613;609;613;609;613;609
351	Mono	R	1	10	DGVGMVEYLR(1)K	0.78082	YADVQKDGVGMVEYLRKEDMEYALRKLDDTK	Q13242	154	Serine/arginine-rich splicing factor 9	SRSF9	Q13242;H0YIB4	154;99
352	Mono	R	0.999905	2	DR(1)DH(0.007)DR(0.997)GR(0.997)	0.41093	RSRSRERHWDSRTRDRDHDRGREKRWQEREP	Q16560	201	U11/U12 small nuclear ribonucleoprotein 35 kDa protein	SNRNP35	Q16560;Q16560-2	201;206
353	Mono	R	0.996511	6	DR(1)DH(0.007)DR(0.997)GR(0.997)	0.41093	RERHWDSRTRDRDHDRGREKRWQEREPTRVW	Q16560	205	U11/U12 small nuclear ribonucleoprotein 35 kDa protein	SNRNP35	Q16560;Q16560-2	205;210
354	Mono	R	0.997175	8	DR(1)DH(0.006)DR(0.997)GR(0.997)	0.521	RHWDSRTRDRDHDRGREKRWQEREPTRVWPD	Q16560	207	U11/U12 small nuclear ribonucleoprotein 35 kDa protein	SNRNP35	Q16560;Q16560-2	207;212
355	Mono	R	0.42545	8	AAFPQGGR(0.425)GR(0.425)GR(0.149)	-0.51704	GPPGGSSRAAFPQGGRGRGRFPGAVPGGDRF	Q16630	202	Cleavage and polyadenylation specificity factor subunit 6	CPSF6	Q16630;Q16630-2	202;202
356	Mono	R	0.42545	10	AAFPQGGR(0.425)GR(0.425)GR(0.149)	-0.51704	PGGSSRAAFPQGGRGRGRFPGAVPGGDRFPG	Q16630	204	Cleavage and polyadenylation specificity factor subunit 6	CPSF6	Q16630;Q16630-2	204;204
357	Mono	R	0.499998	2	MR(0.5)GGR(0.5)QAALR	0.26055	LKKQVVMQAMGSCRMRGGRQAALREVEQIQA	Q2M329	348	Coiled-coil domain-containing protein 96	CCDC96	Q2M329	348
358	Mono	R	0.499998	5	MR(0.5)GGR(0.5)QAALR	0.26055	QVVMQAMGSCRMRGGRQAALREVEQIQALED	Q2M329	351	Coiled-coil domain-containing protein 96	CCDC96	Q2M329	351
359	Mono	R	0.999837	7	SLSQH(1)QR(1)AHTRAR	1.5229	CGKCFSHSRSLSQHQRAHTRARTAAAVAIQS	Q499Z4	415	Zinc finger protein 672	ZNF672	Q499Z4	415
360	Mono	R	0.551797	11	SLTQFKEEFR(0.448)R(0.552)	-1.8598	FGPERSLTQFKEEFRRLHLPGHVLLEDPDSG	Q5T011-5	1705	Protein SZT2	SZT2	Q5T011-5;Q5T011	1705;1762
361	Mono	R	0.999712	5	MPPGR(1)GGR(0.999)PMPPSR(0.001)	0.053518	FPMRGRGGFDRMPPGRGGRPMPPSRRDYDDM	Q5T6W5	233	Heterogeneous nuclear ribonucleoprotein K	HNRNPK	Q5T6W5;P61978-3;P61978;P61978-2;Q5T6W2;Q5T6W1	233;244;268;268;244;199
362	Mono	R	0.999356	8	MPPGR(1)GGR(0.999)PMPPSR(0.001)	0.053518	RGRGGFDRMPPGRGGRPMPPSRRDYDDMSPR	Q5T6W5	236	Heterogeneous nuclear ribonucleoprotein K	HNRNPK	Q5T6W5;P61978-3;P61978;P61978-2;Q5T6W2;Q5T6W1	236;247;271;271;247;202
363	Mono	R	0.845405	14	AEYQR(0.155)K(1)QQFWDSVR(0.845)	-0.072103	SRAEYQRKQQFWDSVRLALFTLAIVAIIGIA	Q6ZWK6	29	Transmembrane protease serine 11F	TMPRSS11F	Q6ZWK6	29
364	Mono	R	1	15	DFK(1)ITCGKVDAVDLR(1)	0.706	KDFKITCGKVDAVDLREYVDICWVDAEEKGN	Q7Z3T8	1379	Zinc finger FYVE domain-containing protein 16	ZFYVE16	Q7Z3T8	1379
365	Mono	R	0.471201	2	H(0.471)R(0.471)FR(0.058)LEEAK	-1.7391	IEKGEVVSQEAELRHRFRLEEAKSRDLKAEV	Q7Z7B0-3	461	Filamin-A-interacting protein 1	FILIP1	Q7Z7B0-3;Q7Z7B0-2;Q7Z7B0	461;709;709
366	Mono	R	1	16	AAAAAAAAAAGAAGGR(1)GSGPGR	-0.33968	AAAAAAAAAAGAAGGRGSGPGRRRHLVPGAG	Q86U42-2	17	Polyadenylate-binding protein 2	PABPN1	Q86U42-2;Q86U42	17;17
367	Mono	R	0.999995	13	PAIARGAAGGGGR(1)	-0.012478	RNRPAIARGAAGGGGRNRPAPYSRPKQLPDK	Q86V81	71	THO complex subunit 4	ALYREF	Q86V81;E9PB61	71;78
368	Mono	R	0.499955	4	GSCR(0.5)LSWK(0.5)MPDDDGGDR	2.4994	PPKDLKVSDITRGSCRLSWKMPDDDGGDRIK	Q8WZ42-3	9432	Titin	TTN	Q8WZ42-3;Q8WZ42-10;Q8WZ42-9;Q8WZ42-5;Q8WZ42-11;Q8WZ42-4;Q8WZ42-7;Q8WZ42-2;Q8WZ42;Q8WZ42-8;Q8WZ42-13;Q8WZ42-12	9432;9557;9624;15406;15929;15951;16121;16764;16856;16981;16990;18497
369	Mono	R	0.938386	9	SR(0.062)GGYGGDR(0.938)GGGSGYGGDR	-0.87155	GGYGGDRSRGGYGGDRGGGSGYGGDRSGGYG	Q92804-2	532	TATA-binding protein-associated factor 2N	TAF15	Q92804-2;Q92804;K7EKB2	532;535;157
370	Mono	R	0.387716	12	GGPGPGPGPYH(1)R(0.388)GR(0.388)GGR(0.225)	-0.4227	GPMRGGPGPGPGPYHRGRGGRGGNEPPPPPP	Q96QC0	705	Serine/threonine-protein phosphatase 1 regulatory subunit 10	PPP1R10	Q96QC0	705
371	Mono	R	0.387716	14	GGPGPGPGPYH(1)R(0.388)GR(0.388)GGR(0.225)	-0.4227	MRGGPGPGPGPYHRGRGGRGGNEPPPPPPPF	Q96QC0	707	Serine/threonine-protein phosphatase 1 regulatory subunit 10	PPP1R10	Q96QC0	707
372	Mono	R	0.999994	3	PTR(1)SPSGSGSR	1.0674	NQSPQRLASQASRPTRSPSGSGSRSRSSSSD	Q96T58	267	Msx2-interacting protein	SPEN	Q96T58;F6WRY4;H0Y5U7	267;226;8
373	Mono	R	0.99884	6	MFGSSR(0.999)GGVR(0.001)	-0.18837	__________MFGSSRGGVRGGQDQFNWEDV	Q9BU76-4	6	Multiple myeloma tumor-associated protein 2	MMTAG2	Q9BU76-4;Q9BU76;Q9BU76-2;Q9BU76-3	6;6;6;6
374	Mono	R	0.999631	8	TKQVHLSR(1)K	0.19783	SLSISRNKTKQVHLSRKKNKIQAEPSRCLKD	Q9C0D4	898	Zinc finger protein 518B	ZNF518B	Q9C0D4	898
375	Mono	R	0.964665	6	R(0.035)GAPPR(0.965)H(1)EGR	-0.24438	FRGRREESFRRGAPPRHEGRAPPRGRDGFPG	Q9C0J8	1111	pre-mRNA 3' end processing protein WDR33	WDR33	Q9C0J8	1111
376	Mono	R	0.932163	12	TTAARPTFEPAR(0.932)GGR(0.068)	0.38023	___MTTAARPTFEPARGGRGKGEGDLSQLSK	U3KQ79	13	Spliceosome-associated protein CWC15 homolog	CWC15	U3KQ79;Q9P013	13;13
377	Mono	R	1	5	LGSGR(1)GTGQMEGR	0.8914	GPPPRGGMAQKLGSGRGTGQMEGRFTGQRR_	Q9UN86-2	435	Ras GTPase-activating protein-binding protein 2	G3BP2	Q9UN86-2;Q9UN86	435;468
378	Mono	R	0.459503	2	SR(0.46)H(0.5)R(0.041)AGMR(1)	-2.1756	DIHPRFLVALISRRSRHRAGMRYKRRGVDKN	Q9Y2H2-2	286	Phosphatidylinositide phosphatase SAC2	INPP5F	Q9Y2H2-2;Q9Y2H2	286;286
379	Mono	R	0.999725	8	SR(0.46)H(0.5)R(0.041)AGMR(1)	-2.1756	LVALISRRSRHRAGMRYKRRGVDKNGNVANY	Q9Y2H2-2	292	Phosphatidylinositide phosphatase SAC2	INPP5F	Q9Y2H2-2;Q9Y2H2	292;292
380	Mono	R	1	4	NH(1)PR(1)VYQNR	-0.12555	SRSYSPAHNRERNHPRVYQNRDFRGHNRGYR	Q9Y2W1	66	Thyroid hormone receptor-associated protein 3	THRAP3	Q9Y2W1	66
381	Mono	R	0.499976	2	MR(0.5)R(0.5)AALR	-1.1058	______________MRRAALRLCALGKGQLT	Q9Y305	2	Acyl-coenzyme A thioesterase 9, mitochondrial	ACOT9	Q9Y305;Q9Y305-4;F8WDI2	2;2;2
382	Mono	R	0.499976	3	MR(0.5)R(0.5)AALR	-1.1058	_____________MRRAALRLCALGKGQLTP	Q9Y305	3	Acyl-coenzyme A thioesterase 9, mitochondrial	ACOT9	Q9Y305;Q9Y305-4;F8WDI2	3;3;3
383	Mono	H	0.999976	2	SH(1)SSACWRKR	3.6139	____MTGRMATLEKSHSSACWRKRSSRTCVE	A1A4T8-2	12	Uncharacterized protein C14orf182	C14orf182	A1A4T8-2;A1A4T8	12;12
384	Mono	H	1	5	R(1)WADH(1)EVR	0.19441	VAERQHHFRRRRWADHEVRRSRSSW______	A6NFL3	108			A6NFL3	108
385	Mono	H	1	4	R(1)GGH(1)QNSYKPY	-0.68601	GDQQSGYGKVSRRGGHQNSYKPY________	H0YA96	203	Heterogeneous nuclear ribonucleoprotein D0	HNRNPD	H0YA96;B4DTC3;Q14103-4;Q14103-3;Q14103-2;Q14103;F5H6R6	203;296;280;299;329;348;194
386	Mono	H	0.612334	7	EYTINIH(0.612)K(0.388)R	0.72798	SAINEVVTREYTINIHKRIHGVGFKKRAPRA	H7C2W9	18	60S ribosomal protein L31	RPL31	H7C2W9;C9JU56;B7Z4E3;B7Z4C8;P62899-3;P62899;P62899-2;B8ZZK4	18;30;30;30;30;30;30;30
387	Mono	H	0.666667	1	H(0.667)KR(0.667)MH(0.667)ADCR	-2.4472	EVCHKSYTQFSNLCRHKRMHADCRTQIKCKD	E7EUL6	206	MDS1 and EVI1 complex locus protein EVI1;PR domain zinc finger protein 16	MECOM;PRDM16	E7EUL6;H0YA13;D6RFY3;D6RDW0;E7EQ57;D3YTA5;F8WEV3;Q03112-5;Q03112-6;Q03112;Q9HAZ2-4;Q03112-4;Q03112-3;Q9HAZ2-2;Q9HAZ2-3;Q9HAZ2	206;221;413;413;394;412;412;206;207;206;228;271;394;412;413;412
388	Mono	H	0.666667	5	H(0.667)KR(0.667)MH(0.667)ADCR	-2.4472	KSYTQFSNLCRHKRMHADCRTQIKCKDCGQM	E7EUL6	210	MDS1 and EVI1 complex locus protein EVI1;PR domain zinc finger protein 16	MECOM;PRDM16	E7EUL6;H0YA13;D6RFY3;D6RDW0;E7EQ57;D3YTA5;F8WEV3;Q03112-5;Q03112-6;Q03112;Q9HAZ2-4;Q03112-4;Q03112-3;Q9HAZ2-2;Q9HAZ2-3;Q9HAZ2	210;225;417;417;398;416;416;210;211;210;232;275;398;416;417;416
389	Mono	H	1	4	R(1)GGH(1)QNNYKPY	0.82378	GQGSTNYGKSQRRGGHQNNYKPY________	D6R9P3	273	Heterogeneous nuclear ribonucleoprotein A/B	HNRNPAB	D6R9P3;D6RD18;D6RBZ0;Q99729-3;Q99729-2;Q99729-4;Q99729	273;276;320;278;325;279;325
390	Mono	H	1	7	PAATVDH(1)SQR	-0.062468	________MPAATVDHSQRICEVWACNLDEE	E5RJE0	8	CCR4-NOT transcription complex subunit 7	CNOT7	E5RJE0;E5RHV9;E5RGA8;E5RGH2;Q9UIV1-2;Q9UIV1	8;8;8;8;8;8
391	Mono	H	0.867244	6	VHER(0.23)SH(0.867)TGDR(0.903)	-0.49184	KLYTTAHHLKVHERSHTGDRPYQCEHAGCGK	E7EN86	233	Zinc finger protein 143	ZNF143	E7EN86;P52747-2;P52747-3;P52747	233;230;260;261
392	Mono	H	1	6	NGKGRH(1)VR	-0.79666	ETLQTICFYKNGKGRHVRNLHKTVMQNGAGG	E7EPT4	24		NDUFV2	E7EPT4	24
393	Mono	H	1	10	MNTPSQPR(0.901)QH(1)FYPSR(0.099)AQPPSSAASR	0.75688	______MNTPSQPRQHFYPSRAQPPSSAASR	E7EUU4	10	Eukaryotic translation initiation factor 4 gamma 1	EIF4G1	E7EUU4;Q04637-8;C9J2Z7;C9JIH5;C9JHW9;C9JWH9;Q04637-3;Q04637	10;50;50;10;10;50;10;50
394	Mono	H	1	2	VH(1)IEIGPDGR	-0.74158	NDIYNFFSPLNPMRVHIEIGPDGRVTGEADV;NDIYNFFSPLNPVRVHIEIGPDGRVTGEADV	E9PCY7	318	Heterogeneous nuclear ribonucleoprotein H;Heterogeneous nuclear ribonucleoprotein H, N-terminally processed;Heterogeneous nuclear ribonucleoprotein F;Heterogeneous nuclear ribonucleoprotein F, N-terminally processed;Heterogeneous nuclear ribonucleoprotein H2;Heterogeneous nuclear ribonucleoprotein H2, N-terminally processed	HNRNPH1;HNRNPF;HNRNPH2	E9PCY7;G8JLB6;P31943;H0YB39;H0YBD7;H0YBG7;F5GZT4;P52597;P55795	318;318;318;193;132;74;48;318;318
395	Mono	H	0.958988	17	YGDGGSTFQSTTGH(0.041)CVH(0.959)MR	-0.15557	GDGGSTFQSTTGHCVHMRGLPYRATENDIYN	E9PCY7	292	Heterogeneous nuclear ribonucleoprotein H;Heterogeneous nuclear ribonucleoprotein H, N-terminally processed	HNRNPH1	E9PCY7;G8JLB6;P31943;H0YB39;D6RIT2;H0YBD7;H0YBG7;F5GZT4	292;292;292;167;155;106;48;22
396	Mono	H	1	5	LFYVH(1)YIDFNK	-2.2229	ILSVKDISGRKLFYVHYIDFNKRLDEWVTHE	H0YEP0	43	Histone acetyltransferase KAT5	KAT5	H0YEP0;E9PRM3;E9PRL6;Q92993-2;Q92993-4;Q92993;Q92993-3	43;40;40;46;79;46;79
397	Mono	H	1	2	VH(1)PVSTMVK	0.61745	VMDLVGSILKNLRRVHPVSTMVKGLYGIKEE	F5H245	257	L-lactate dehydrogenase;L-lactate dehydrogenase C chain	LDHC	F5H245;P07864	257;271
398	Mono	H	1	6	K(1)EATLH(1)DR	0.41371	GCPYSDMNLKKEATLHDRLREQTQANLESDS	F5H508	231	Lethal(3)malignant brain tumor-like protein 4	L3MBTL4	F5H508;F8W9S8;Q8NA19-2;Q8NA19	231;418;418;418
399	Mono	H	1	3	TKH(1)LEELR	0.63975	RKVISLNKQIAQKTKHLEELRASHTSLQARY	F8W9X7	331	Coiled-coil domain-containing protein 93	CCDC93	F8W9X7;Q567U6	331;332
400	Mono	H	1	5	WSQAH(1)TMMADKGR	-0.6216	PESLVRRHGEKWSQAHTMMADKGREADNLFF	F8WBI1	24		SUMO1	F8WBI1	24
401	Mono	H	0.982103	5	ILNLH(0.982)PK(0.018)	0.063098	SGISHVEAKKRILNLHPKIFGNKWFPRV___	H0Y4W6	298		ESR1	H0Y4W6;P03372-4	298;300
402	Mono	H	1	6	EQLEIH(1)EELRR	2.7314	LIQNQDCVLKEQLEIHEELRRFKESHFQEVL	H0Y876	234	Coiled-coil domain-containing protein 136	CCDC136	H0Y876;H7C4R2;Q96JN2-2;Q96JN2;Q96JN2-4	234;520;643;643;643
403	Mono	H	0.996375	13	VPR(0.002)EGELGGCGR(0.001)H(0.996)SAGDR	-0.95789	CCKVPREGELGGCGRHSAGDRNRGKQWQPDL	H3BRR8	129		CCDC135	H3BRR8	129
404	Mono	H	0.975306	9	YGRPPDSH(0.025)H(0.975)SR	-0.85709	LRVQMARYGRPPDSHHSRRGPPPRRYGGGGY	J3KP15	100	Serine/arginine-rich splicing factor 2	SRSF2	J3KP15;Q01130;J3QL05;B4DN89	100;100;100;100
405	Mono	H	1	3	DKH(1)KDGSGER	-1.0876	RLRSHPAQLKHKRDKHKDGSGERGEKDASKI	J3KPZ3	911	E3 ubiquitin-protein ligase MYCBP2	MYCBP2	J3KPZ3;O75592-2;O75592	911;873;873
406	Mono	H	0.943699	5	ILMEH(0.944)IH(0.025)K(0.032)	0.68443	KVKGNVFKNKRILMEHIHKLKADKARKKLLA	J3QR09	138	Ribosomal protein L19;60S ribosomal protein L19	RPL19	J3QR09;J3KTE4;P84098	138;139;141
407	Mono	H	1	10	HGRPGIGATH(1)SSR	-2.2389	TYKPVKHGRPGIGATHSSRFIPLK_______	K7EM56	104	40S ribosomal protein S15	RPS15	K7EM56;K7EQJ5;K7ELC2;P62841	104;133;144;137
408	Mono	H	1	9	AENPSLENH(1)R	0.87232	______MAENPSLENHRIKSFKNKGRDVETM	O00505	10	Importin subunit alpha-4	KPNA3	O00505	10
409	Mono	H	1	8	ASR(1)GGGNH(1)QNNYQPY	-0.82562	GQQSTYGKASRGGGNHQNNYQPY________	O14979-3	237	Heterogeneous nuclear ribonucleoprotein D-like	HNRNPDL	O14979;O14979-3;O14979-2	413;237;294
410	Mono	H	1	9	PQNEYIELH(1)R	-1.9068	______MPQNEYIELHRKRYGYRLDYHEKKR	O95478	10	Ribosome biogenesis protein NSA2 homolog	NSA2	O95478	10
411	Mono	H	0.92637	4	RVEH(0.926)H(0.05)DH(0.024)AVVSGR	-2.2776	AACFYDIKLGRRRVEHHDHAVVSGRLAGENM	O95831-3	450	Apoptosis-inducing factor 1, mitochondrial	AIFM1	O95831-3;O95831;O95831-2;E9PMA0;O95831-5	450;454;167;115;102
412	Mono	H	1	3	WDH(1)VDSGGTRR	0.48825	GRLEAGGASPKLRWDHVDSGGTRRPGVSPEG	O95873	119	Uncharacterized protein C6orf47	C6orf47	O95873	119
413	Mono	H	1	18	MMCGAPSATQPATAETQH(1)IADQVR	0.5771	CGAPSATQPATAETQHIADQVRSQLEEKENK	P04080	18	Cystatin-B	CSTB	P04080	18
414	Mono	H	0.999872	4	EIVH(1)LQAGQCGNQIGAK	-0.31937	__________MREIVHLQAGQCGNQIGAKFW	P68371	6	Tubulin beta-4A chain;Tubulin beta-4B chain	TUBB4A;TUBB4B	P04350;M0R042;M0QYM7;P68371;M0R2D3;M0R0X0;M0QY85;M0QY37;M0QX14;M0R2T4;M0QZL7;M0R278	6;6;6;6;6;6;6;6;6;6;57;51
415	Mono	H	1	4	QALH(1)EAVEMDR	-2.8228	RIDHGHHEGKAKQALHEAVEMDRAIGQAGSL	P05186-2	273	Alkaline phosphatase, tissue-nonspecific isozyme	ALPL	P05186-2;P05186-3;P05186	273;295;350
416	Mono	H	1	8	VDNDENEH(1)QLSLR	-1.3058	ADKDYHFKVDNDENEHQLSLRTVSLGAGAKD	P06748-2	40	Nucleophosmin	NPM1	P06748-2;P06748;P06748-3;E5RGW4	40;40;40;32
417	Mono	H	1	2	GH(1)YTEGAELVDSVLDVVRK	-0.22218	FVFGQSGAGNNWAKGHYTEGAELVDSVLDVV	P68371	105	Tubulin beta chain;Tubulin beta-4B chain;Tubulin beta-2B chain;Tubulin beta-2A chain	TUBB;TUBB3;TUBB4B;TUBB2B;TUBB2A	Q5JP53;P07437;Q5ST81;E9PBJ4;G3V2A3;P68371;Q13509-2;Q9BVA1;Q13885	87;105;33;105;33;105;33;105;105
418	Mono	H	0.999994	8	HLEINPDH(1)SIIETLR	-0.33308	MGYMAAKKHLEINPDHSIIETLRQKAEADKN	P07900	640	Heat shock protein HSP 90-alpha	HSP90AA1	P07900;P07900-2	640;762
419	Mono	H	1	4	LGIH(1)EDSQNR	1.3854	KKFYEQFSKNIKLGIHEDSQNRKKLSELLRY	P07900	450	Heat shock protein HSP 90-alpha	HSP90AA1	P07900;P07900-2;Q86U12	450;572;271
420	Mono	H	1	7	ATAGDTH(1)LGGEDFDNR	-0.01743	IDAGVFEVKATAGDTHLGGEDFDNRLVNHFM;IDDGIFEVKATAGDTHLGGEDFDNRLVNHFV	P08107	227	Heat shock 70 kDa protein 1A/1B;Heat shock 70 kDa protein 6;Putative heat shock 70 kDa protein 7	HSPA1A;HSPA6;HSPA7	P08107;P08107-2;E7EP94;V9GZ37;P17066;P48741	227;172;136;62;229;229
421	Mono	H	0.872286	4	LVNH(0.872)FVEEFK(0.128)R	-1.1411	DTHLGGEDFDNRLVNHFVEEFKRKHKKDISQ	P08107	240	Heat shock 70 kDa protein 1A/1B	HSPA1A	P08107;P08107-2;E7EP94;V9GZ37	240;185;149;75
422	Mono	H	0.999993	1	H(1)LEINPDHPIVETLR	-1.4049	ALRDNSTMGYMMAKKHLEINPDHPIVETLRQ	P08238	625	Heat shock protein HSP 90-beta	HSP90AB1	P08238	625
423	Mono	H	1	8	HLEINPDH(1)PIVETLR	0.32875	MGYMMAKKHLEINPDHPIVETLRQKAEADKN	P08238	632	Heat shock protein HSP 90-beta	HSP90AB1	P08238	632
424	Mono	H	0.867085	12	DGQVINETSQH(0.133)H(0.867)DDLE	-0.63884	VETRDGQVINETSQHHDDLE___________	P08670	462	Vimentin	VIM	P08670	462
425	Mono	H	1	7	YHTVNGH(1)NCEVR	-1.2496	SVDKIVIQKYHTVNGHNCEVRKALSKQEMAS	P09651-2	173	Heterogeneous nuclear ribonucleoprotein A1;Heterogeneous nuclear ribonucleoprotein A1, N-terminally processed	HNRNPA1	P09651-2;P09651;F8W6I7;P09651-3;H0YH80;F8VZ49;F8VTQ5	173;173;173;173;44;192;124
426	Mono	H	0.488515	13	ATIAGGGVIPH(0.023)IH(0.489)K(0.489)	-0.44039	LIKATIAGGGVIPHIHKSLIGKKGQQKTA__	Q71UI9	115	Histone H2A.V;Histone H2A.Z	H2AFV;H2AFZ	Q71UI9;P0C0S5;Q71UI9-3;Q71UI9-4	115;115;77;89
427	Mono	H	1	12	QEYDESGPSIVH(1)R	1.5677	WISKQEYDESGPSIVHRKCF___________	P63261	371	POTE ankyrin domain family member I;POTE ankyrin domain family member J;Actin, cytoplasmic 1;Actin, cytoplasmic 1, N-terminally processed;POTE ankyrin domain family member F;Actin, cytoplasmic 2;Actin, cytoplasmic 2, N-terminally processed;POTE ankyrin domain family member E;Putative beta-actin-like protein 3	POTEI;POTEJ;ACTB;POTEF;ACTG1;POTEE;POTEKP	P0CG38;P0CG39;P60709;A5A3E0;P63261;Q6S8J3;Q9BYX7	1071;1034;371;1071;371;1071;371
428	Mono	H	1	7	STAGDTH(1)LGGEDFDNR	-1.4184	IEDGIFEVKSTAGDTHLGGEDFDNRMVNHFI	P11142	227	Heat shock cognate 71 kDa protein;Heat shock-related 70 kDa protein 2	HSPA8;HSPA2	P11142;E9PKE3;P11142-2;E9PN89;P54652	227;208;227;167;230
429	Mono	H	1	6	QR(0.994)GVSH(1)AMGGR(0.006)GGINR	-2.5516	QGVRGRQFNRQRGVSHAMGGRGGINRGNIN_	P12270	2349	Nucleoprotein TPR	TPR	P12270	2349
430	Mono	H	0.527981	13	AGVHIKLPNLGK(0.117)H(0.528)EK(0.355)	-0.060082	GLRAGVHIKLPNLGKHEKFSEVLKRLRLQKR	P12277	305	Creatine kinase B-type	CKB	P12277;H0YJG0;H0YJK0	305;103;56
431	Mono	H	0.999995	9	TGTITTFEH(1)AHNMR	-0.49239	VDQFLVKTGTITTFEHAHNMRVMKFSVSPVV	P13639	490	Elongation factor 2	EEF2	P13639	490
432	Mono	H	0.999804	11	TGTITTFEHAH(1)NMR	-0.43684	QFLVKTGTITTFEHAHNMRVMKFSVSPVVRV	P13639	492	Elongation factor 2	EEF2	P13639	492
433	Mono	H	0.869599	8	LNFSH(0.041)GTH(0.87)EYH(0.09)AETIK	-0.31879	KSGMNVARLNFSHGTHEYHAETIKNVRTATE	P14618	81	Pyruvate kinase PKM;Pyruvate kinase	PKM	P14618;H3BQ34;H3BT25;H3BUW1;H3BTJ2;P14618-2;H3BTN5	81;81;81;81;81;81;81
434	Mono	H	0.988473	11	LNFSHGTH(0.005)EYH(0.988)AETIK(0.007)	-0.7888	MNVARLNFSHGTHEYHAETIKNVRTATESFA	P14618	84	Pyruvate kinase PKM;Pyruvate kinase	PKM	P14618;H3BQ34;H3BT25;H3BUW1;H3BTJ2;P14618-2;H3BTN5	84;84;84;84;84;84;84
435	Mono	H	1	7	THNDIIH(1)NENMR	-1.2069	SQARDENKRTHNDIIHNENMRQGRDKYKTLR	P15311	554	Ezrin	EZR	P15311;E7EQR4	554;522
436	Mono	H	1	11	DREAAEGLGSH(1)DR	-0.8609	AKLAKDREAAEGLGSHDRAIKYLNQDYEALR	P17655	21	Calpain-2 catalytic subunit	CAPN2	P17655	21
437	Mono	H	0.999827	3	SLH(1)DALCVVKR	0.82439	RGANDFMCDEMERSLHDALCVVKRVLESKSV	P17987	393	T-complex protein 1 subunit alpha	TCP1	P17987;E7EQR6;E7ERF2;F5H282;F5GZ03	393;238;393;169;191
438	Mono	H	1	6	VLIAAH(1)GNSLR	-2.2793	IVPQIKEGKRVLIAAHGNSLRGIVKHLEGLS	P18669	186	Phosphoglycerate mutase 1;Phosphoglycerate mutase 2	PGAM1;PGAM2	P18669;P15259	186;186
439	Mono	H	0.998535	5	ASEEH(0.999)LK(0.001)QHYIDLK	-1.1444	GFRLVAMKFLRASEEHLKQHYIDLKDRPFFP	Q32Q12	187	Nucleoside diphosphate kinase;Nucleoside diphosphate kinase B;Putative nucleoside diphosphate kinase	NME1-NME2;NME2;NME2P1	Q32Q12;P22392-2;J3KPD9;P22392;O60361	187;162;162;47;32
440	Mono	H	1	7	YHTINGH(1)NAEVR	-0.80338	PVDKIVLQKYHTINGHNAEVRKALSRQEMQE	P22626	180	Heterogeneous nuclear ribonucleoproteins A2/B1	HNRNPA2B1	P22626;P22626-2	180;168
441	Mono	H	1	10	SRGGGGGGFH(1)R	-0.38067	SRDRFRSRGGGGGGFHRRGGGGGRGGLHDFR	P23246	17	Splicing factor, proline- and glutamine-rich	SFPQ	P23246;P23246-2	17;17
442	Mono	H	1	7	AVTEQGH(1)ELSNEER	-2.5234	YDDMAAAMKAVTEQGHELSNEERNLLSVAYK	P31946	36	14-3-3 protein beta/alpha;14-3-3 protein beta/alpha, N-terminally processed	YWHAB	P31946;Q4VY20;Q4VY19;P31946-2	36;36;36;34
443	Mono	H	1	16	PSETPQAEVGPTGCPH(1)R	0.916	PSETPQAEVGPTGCPHRSGPHSAKGSLEKGS	P35520	17	Cystathionine beta-synthase	CBS	P35520;P35520-2;C9JMA6	17;17;17
444	Mono	H	0.504336	9	VNVPVIGGH(0.504)AGK(0.496)	0.15575	KGLDPARVNVPVIGGHAGKTIIPLISQCTPK	P40926	200	Malate dehydrogenase, mitochondrial;Malate dehydrogenase	MDH2	P40926;P40926-2;G3XAL0	200;158;93
445	Mono	H	0.965756	5	VTAIH(0.966)IDPATH(0.034)R	1.0352	SAKHGLYLPTRVTAIHIDPATHRQKLYTLQD	P49327	1056	Fatty acid synthase;[Acyl-carrier-protein] S-acetyltransferase;[Acyl-carrier-protein] S-malonyltransferase;3-oxoacyl-[acyl-carrier-protein] synthase;3-oxoacyl-[acyl-carrier-protein] reductase;3-hydroxyacyl-[acyl-carrier-protein] dehydratase;Enoyl-[acyl-carrier-protein] reductase;Oleoyl-[acyl-carrier-protein] hydrolase	FASN	P49327	1056
446	Mono	H	0.779646	11	VTAIH(0.22)IDPATH(0.78)R	2.8209	YLPTRVTAIHIDPATHRQKLYTLQDKAQVAD	P49327	1062	Fatty acid synthase;[Acyl-carrier-protein] S-acetyltransferase;[Acyl-carrier-protein] S-malonyltransferase;3-oxoacyl-[acyl-carrier-protein] synthase;3-oxoacyl-[acyl-carrier-protein] reductase;3-hydroxyacyl-[acyl-carrier-protein] dehydratase;Enoyl-[acyl-carrier-protein] reductase;Oleoyl-[acyl-carrier-protein] hydrolase	FASN	P49327	1062
447	Mono	H	0.5	10	TVVTGIEMFH(0.5)K(0.5)	-2.5671	HSKNIRTVVTGIEMFHKSLERAEAGDNLGAL	P49411	310	Elongation factor Tu, mitochondrial	TUFM	P49411	310
448	Mono	H	1	5	MNNPH(1)AIPR	-1.5632	___________MNNPHAIPRRHAPIEQLARQ	P49757-9	5			P49757-9	5
449	Mono	H	1	1	H(1)STLDFMLGAK	-0.064473	__________MAAARHSTLDFMLGAKADGET	P52788-2	6	Spermine synthase	SMS	P52788-2;P52788	6;6
450	Mono	H	1	4	EK(1)TH(1)GEVERR	-0.061952	FIDELDAIAPKREKTHGEVERRIVSQLLTLM	P55072	317	Transitional endoplasmic reticulum ATPase	VCP	P55072	317
451	Mono	H	0.999993	5	HVRSH(1)GDK	-0.051423	KIFQNSSNLSRHVRSHGDKLFKCEECAKLFS	P57071-6	411	PR domain zinc finger protein 15	PRDM15;ZNF298	P57071-6;P57071-5;P57071-3;P57071-2;P57071;Q4W8S1;E7ER26;F6QQW4	411;431;431;431;760;374;394;394
452	Mono	H	0.999999	26	TTGIVMDSGDGVTHTVPIYEGYALPH(1)AILR	0.60517	GVTHTVPIYEGYALPHAILRLDLAGRDLTDY	P63261	173	Actin, cytoplasmic 1;Actin, cytoplasmic 1, N-terminally processed;Actin, cytoplasmic 2;Actin, cytoplasmic 2, N-terminally processed	ACTB;ACTG1	P60709;P63261;I3L3I0;I3L1U9;I3L4N8	173;173;173;173;164
453	Mono	H	1	6	VAPEEH(1)PVLLTEAPLNPK	0.073992	WHHTFYNELRVAPEEHPVLLTEAPLNPKANR	P63261	101	Actin, cytoplasmic 1;Actin, cytoplasmic 1, N-terminally processed;Actin, cytoplasmic 2;Actin, cytoplasmic 2, N-terminally processed	ACTB;ACTG1	P60709;G5E9R0;E7EVS6;P63261;I3L3I0;I3L1U9;I3L4N8;K7EM38;I3L3R2;J3KT65	101;101;101;101;101;101;92;101;101;101
454	Mono	H	1	5	YPIEH(1)GIVTNWDDMEKIWHHTFYNELR	0.42788	AQSKRGILTLKYPIEHGIVTNWDDMEKIWHH	P63261	73	Actin, cytoplasmic 1;Actin, cytoplasmic 1, N-terminally processed;Actin, cytoplasmic 2;Actin, cytoplasmic 2, N-terminally processed	ACTB;ACTG1	P60709;G5E9R0;E7EVS6;C9JZR7;C9JUM1;P63261;I3L3I0;I3L1U9;I3L4N8;K7EM38;I3L3R2;J3KT65	73;73;73;73;76;73;73;73;64;73;73;73
455	Mono	H	1	9	ACQSIYPLH(1)DVFVR	-0.28469	IGKDIEKACQSIYPLHDVFVRKVKMLKKPKF	P61247	208	40S ribosomal protein S3a	RPS3A	P61247;H0Y9Y4;D6RG13;D6RAT0;D6RB09;D6R9B6	208;152;188;171;171;89
456	Mono	H	0.999144	8	GIPH(0.001)LVTH(0.999)DAR	0.54278	RKIFVGTKGIPHLVTHDARTIRYPDPLIKVN	P62701	142	40S ribosomal protein S4, X isoform;40S ribosomal protein S4, Y isoform 1;40S ribosomal protein S4, Y isoform 2	RPS4X;RPS4Y1;RPS4Y2	P62701;C9JEH7;P22090;Q8TD47	142;151;142;142
457	Mono	H	1	8	DAVTYTEH(1)AKR	-2.03	VFLENVIRDAVTYTEHAKRKTVTAMDVVYAL	P62805	76	Histone H4	HIST1H4A	P62805	76
458	Mono	H	0.998188	8	GIVK(0.002)DIIH(0.998)DPGR	-0.75932	AERHGYIKGIVKDIIHDPGRGAPLAKVVFRD	P62917	50	60S ribosomal protein L8	RPL8	P62917;E9PKU4;E9PKZ0;G3V1A1	50;50;50;50
459	Mono	H	0.999818	10	GFGYKGSCFH(1)R	-0.16029	LSTGEKGFGYKGSCFHRIIPGFMCQGGDFTR	P62937	54	Peptidyl-prolyl cis-trans isomerase A;Peptidyl-prolyl cis-trans isomerase A, N-terminally processed;Peptidyl-prolyl cis-trans isomerase	PPIA	P62937;F8WE65;C9J5S7	54;54;54
460	Mono	H	0.994898	14	TLSDYNIQK(0.005)ESTLH(0.995)LVLR	0.92404	GRTLSDYNIQKESTLHLVLRLRGGAKKRKKK	P62979	68	Ubiquitin-40S ribosomal protein S27a;Ubiquitin;40S ribosomal protein S27a;Ubiquitin-60S ribosomal protein L40;Ubiquitin;60S ribosomal protein L40;Polyubiquitin-B;Ubiquitin;Polyubiquitin-C;Ubiquitin	RPS27A;UBB;UBC;UBA52	P62979;J3QTR3;J3QS39;F5H6Q2;F5GYU3;F5H2Z3;F5H265;B4DV12;F5H388;F5H747;F5GXK7;J3QKN0;Q96C32;F5H041;P62987;P0CG47;P0CG48;M0R1M6;M0R2S1	68;68;68;68;68;68;68;68;68;68;68;68;68;68;68;68;68;43;50
461	Mono	H	1	2	EH(1)ALLAYTLGVK	0.66721	GEFEAGISKNGQTREHALLAYTLGVKQLIVG	P68104	136	Elongation factor 1-alpha 1;Putative elongation factor 1-alpha-like 3;Elongation factor 1-alpha 2	EEF1A1;EEF1A1P5;EEF1A2	P68104;Q5VTE0;Q05639	136;136;136
462	Mono	H	1	11	YYVTIIDAPGH(1)R	-0.047741	FETSKYYVTIIDAPGHRDFIKNMITGTSQAD	P68104	95	Elongation factor 1-alpha 1;Putative elongation factor 1-alpha-like 3	EEF1A1;EEF1A1P5	P68104;Q5VTE0;A6PW80;Q5JR01	95;95;95;95
463	Mono	H	0.99886	3	LDH(0.999)K(0.001)FDLMYAKR	0.63369	LSNTTAIAEAWARLDHKFDLMYAKRAFVHWY	P68363	393	Tubulin alpha-1B chain;Tubulin alpha-4A chain;Tubulin alpha-1A chain;Tubulin alpha-3C/D chain	TUBA1B;TUBA4A;TUBA1A;TUBA3C;TUBA8	P68363;P68366-2;P68366;Q71U36-2;Q71U36;Q13748;V9GZ17	393;378;393;358;393;393;151
464	Mono	H	1	12	SAPATGGVK(0.5)K(0.5)PH(1)R	0.25296	AARKSAPATGGVKKPHRYRPGTVALREIRRY	Q71DI3	40	Histone H3.2;Histone H3.1t;Histone H3.1;Histone H3	HIST2H3A;HIST3H3;HIST1H3A;HIST2H3PS2	Q71DI3;Q16695;P68431;Q5TEC6	40;40;40;40
465	Mono	H	1	10	GTRGGGFGAH(1)GR(0.941)GR(0.059)	-0.11758	AGKSARGTRGGGFGAHGRGRSYSRGGGDQGY	P98179	97	Putative RNA-binding protein 3	RBM3	P98179	97
466	Mono	H	0.999971	1	H(1)LEMNPHFGSHR	3.0131	LVFLPGWNLIYTMQKHLEMNPHFGSHRYQIL	Q08211	669	ATP-dependent RNA helicase A	DHX9	Q08211	669
467	Mono	H	1	9	EDITQSAQH(1)ALR	1.3588	HLDRQQREDITQSAQHALRLAAFGQLHKVLG	Q12906	320	Interleukin enhancer-binding factor 3	ILF3	Q12906;Q12906-7;Q12906-5;Q12906-4;Q12906-2;Q12906-6;Q12906-3	320;320;320;320;320;320;320
468	Mono	H	0.5	8	LAAFGQLH(0.5)K(0.5)	0.46376	QSAQHALRLAAFGQLHKVLGMDPLPSKMPKK	Q12906	331	Interleukin enhancer-binding factor 3	ILF3	Q12906;Q12906-7;Q12906-5;Q12906-4;Q12906-2;Q12906-6;Q12906-3	331;331;331;331;331;331;331
469	Mono	H	1	4	PAVH(1)H(1)PSNWPMR	0.065688	LWEILSRCPDLRPAVHHPSNWPMRQNWAIPL	Q16671-2	432			Q16671-2	432
470	Mono	H	1	5	PAVH(1)H(1)PSNWPMR	0.065688	WEILSRCPDLRPAVHHPSNWPMRQNWAIPLP	Q16671-2	433			Q16671-2	433
471	Mono	H	0.999843	5	SLSQH(1)QR(1)AHTRAR	1.5229	AECGKCFSHSRSLSQHQRAHTRARTAAAVAI	Q499Z4	413	Zinc finger protein 672	ZNF672	Q499Z4	413
472	Mono	H	1	9	MDFEDDYTH(1)SACR	-1.1925	_______MDFEDDYTHSACRNTYQGFNGMDR	Q5BKZ1	9	DBIRD complex subunit ZNF326	ZNF326	Q5BKZ1;Q5BKZ1-2;E2QRN4	9;9;9
473	Mono	H	1	1	H(1)RATQSGQR	-0.75714	SSGDSVARSHVQWLRHRATQSGQRRWRHALH	Q5SXM2	721	snRNA-activating protein complex subunit 4	SNAPC4	Q5SXM2	721
474	Mono	H	0.998729	4	K(0.001)LAH(0.999)AMMEAFRK(0.001)	2.1374	HAVECESKLEAKKLAHAMMEAFRKTFHSMKS	Q7Z2X4-3	131	PTB-containing, cubilin and LRP1-interacting protein	PID1	Q7Z2X4-3;Q7Z2X4-4;Q7Z2X4-2;Q7Z2X4	131;180;211;213
475	Mono	H	1	11	ASVSSATFSGH(1)GAR	-0.48337	____MASVSSATFSGHGARSLLQFLRLVGQL	Q7Z4H3-2	12	HD domain-containing protein 2	HDDC2	Q7Z4H3-2;Q7Z4H3;V9GYS5;V9GZ04;Q7Z4H3-3	12;12;12;12;12
476	Mono	H	1	8	SLGTADVH(1)FER	-4.3088	VHYDRSGRSLGTADVHFERKADALKAMKQYN	Q86V81	152	THO complex subunit 4	ALYREF	Q86V81;E9PB61	152;159
477	Mono	H	0.781173	5	H(0.219)CLAH(0.781)YRELR	-0.39311	NFSQLIISFRKHCLAHYRELRLCIKY_____	Q86YL5-2	188			Q86YL5-2	188
478	Mono	H	1	4	GRSH(1)EARSGGR	2.2177	HYGGEGRYEEYRGRSHEARSGGRSTDAHSRG	Q8N7X1	431	RNA-binding motif protein, X-linked-like-3	RBMXL3	Q8N7X1	431
479	Mono	H	0.938063	13	SDEFSLADALPEH(0.938)SPAK(0.062)	-0.34224	__MSDEFSLADALPEHSPAKTSAVSNTKPGQ	Q8NDC0	14	MAPK-interacting and spindle-stabilizing protein-like	MAPK1IP1L	Q8NDC0	14
480	Mono	H	1	11	GGPGPGPGPYH(1)R(0.388)GR(0.388)GGR(0.225)	-0.4227	GGPMRGGPGPGPGPYHRGRGGRGGNEPPPPP	Q96QC0	704	Serine/threonine-protein phosphatase 1 regulatory subunit 10	PPP1R10	Q96QC0	704
481	Mono	H	1	7	R(0.041)GAPPR(0.959)H(1)EGR	0.37212	RGRREESFRRGAPPRHEGRAPPRGRDGFPGP	Q9C0J8	1112	pre-mRNA 3' end processing protein WDR33	WDR33	Q9C0J8	1112
482	Mono	H	1	7	ELK(1)LENH(1)QENSR	1.1376	QKKRKREKKELKLENHQENSRNQKPKKRKKG	Q9NX58	211	Cell growth-regulating nucleolar protein	LYAR	Q9NX58	211
483	Mono	H	0.5	6	EDK(0.5)GQH(0.5)GMILGK	0.77614	KEVGKGNEGKEDKGQHGMILGKGNVKTQGEV	Q9NZW4	405	Dentin sialophosphoprotein;Dentin phosphoprotein;Dentin sialoprotein	DSPP	Q9NZW4	405
484	Mono	H	0.969382	2	SH(0.969)SR(0.031)TPQR	-2.3156	RGRSRSRSLVRRGRSHSRTPQRRGRSGSSSE	Q9UQ35	714	Serine/arginine repetitive matrix protein 2	SRRM2	Q9UQ35;Q9UQ35-2;I3L4D8;I3L182	714;714;714;618
485	Mono	H	1	2	NH(1)PR(1)VYQNR	-0.12555	SRSRSYSPAHNRERNHPRVYQNRDFRGHNRG	Q9Y2W1	64	Thyroid hormone receptor-associated protein 3	THRAP3	Q9Y2W1	64
486	di	K	1	4	FLNK(1)LAEER	-2.1156	CSSLPHYQKLKKFLNKLAEERRQKKET____	A8MXP9	884	Matrin-3	MATR3	A8MXP9;P43243;B3KM87;P43243-2	884;836;498;548
487	di	K	1	5	AARPK(1)DLPR	-0.60559	EGELSTCGCSRAARPKDLPRDWLWGGCGDNI	C9J8I8	156	Protein Wnt;Protein Wnt-5a	WNT5A	C9J8I8;P41221-2;P41221	156;156;171
488	di	K	0.999987	5	KYEEK(1)DAEEIK(1)	2.0126	KEHEEEEERRKKYEEKDAEEIKRQNALYEIE	C9J9F8	139	Coiled-coil domain-containing protein 173	CCDC173	C9J9F8;Q0VFZ6	139;238
489	di	K	0.999978	11	KYEEK(1)DAEEIK(1)	2.0126	EERRKKYEEKDAEEIKRQNALYEIEMRKK__	C9J9F8	145	Coiled-coil domain-containing protein 173	CCDC173	C9J9F8;Q0VFZ6	145;244
490	di	K	1	7	ISQRIYK(1)EER	-2.7308	SQKINLIDKISQRIYKEEREYFDEMKEYGPI	E9PNL2	221	Sorting nexin-7	SNX7	E9PNL2;Q9UNH6-2;Q9UNH6;Q9UNH6-3	221;212;212;276
491	di	K	1	2	YK(1)AQDTPAR	1.4876	FTEKTIPNVIISHRYKAQDTPARKTFEQALT	F2Z2U4	1007	Transformation/transcription domain-associated protein	TRRAP	F2Z2U4;Q9Y4A5-2;Q9Y4A5;H0Y4W2	1007;1008;1008;723
492	di	K	1	3	LLK(1)QYGFPR	2.3508	DRHYAMKVLSKKKLLKQYGFPRRPPPRGSQA	J3KPJ3	193	Calcium/calmodulin-dependent protein kinase kinase 1	CAMKK1	J3KPJ3;F8W9H1;Q8N5S9;Q8N5S9-2	193;166;166;166
493	di	K	1	6	ELLSCK(1)SEELR	-0.88533	QLKHQVDHQKELLSCKSEELRVMSERVQESM	H0YBG5	73	Protein Spindly	SPDL1	H0YBG5;Q96EA4-2;Q96EA4;D6RIF7;D6RIB8;D6RC83	73;144;144;144;144;144
494	di	K	1	14	FQASMRSPNMEPFK(1)	-3.678	_MFQASMRSPNMEPFKQQKVEDFYDIGEELG	H0YKW8	15	Death-associated protein kinase 2	DAPK2	H0YKW8;H0YLP5;H0YMK1;Q9UIK4;Q9UIK4-2	15;15;15;15;15
495	di	K	1	5	AIDPK(1)QR(1)	1.5153	LAAVDQTYKLKAIDPKQRELSFIVNSSVFLE	J3QTJ6	5024	Fibrous sheath-interacting protein 2	FSIP2	J3QTJ6;Q5CZC0	5024;4935
496	di	K	1	3	QYK(1)GIIDCVVR	-0.36915	QVQHASKQITADKQYKGIIDCVVRIPKEQGV	P05141	52	ADP/ATP translocase 2;ADP/ATP translocase 2, N-terminally processed	SLC25A5	P05141	52
497	di	K	1	4	QATK(1)DAGAIAGLNVLR	-0.14466	ITVPAYFNDSQRQATKDAGAIAGLNVLRIIN	P17066	161	Heat shock 70 kDa protein 6	HSPA6	P17066	161
498	di	K	1	16	TITLEVEPSDTIENVK(1)	2.2381	TITLEVEPSDTIENVKAKIQDKEGIPPDQQR	P62979	27	Ubiquitin-40S ribosomal protein S27a;Ubiquitin;40S ribosomal protein S27a;Ubiquitin-60S ribosomal protein L40;Ubiquitin;60S ribosomal protein L40;Polyubiquitin-B;Ubiquitin;Polyubiquitin-C;Ubiquitin	RPS27A;UBB;UBC;UBA52;UBBP4	P62979;J3QTR3;J3QS39;F5H6Q2;F5GYU3;F5H2Z3;F5H265;B4DV12;F5H388;F5H747;F5GXK7;J3QKN0;Q96C32;F5H041;P62987;P0CG47;P0CG48;M0R1V7;J3QLP7;J3QRK5;F5GZ39;J3QSA3	27;27;27;27;27;27;27;27;27;27;27;27;27;27;27;27;27;27;103;103;27;27
499	di	K	1	4	GSFK(1)YAWVLDK	1.2138	EKFEKEAAEMGKGSFKYAWVLDKLKAERERG	P68104	55	Elongation factor 1-alpha 1;Putative elongation factor 1-alpha-like 3;Elongation factor 1-alpha 2	EEF1A1;EEF1A1P5;EEF1A2	P68104;Q5VTE0;A6PW80;Q5JR01;Q05639	55;55;55;55;55
500	di	K	1	11	MDSTEPPYSQK(1)R	0.21278	VGVNKMDSTEPPYSQKRYEEIVKEVSTYIKK	P68104	165	Elongation factor 1-alpha 1;Putative elongation factor 1-alpha-like 3	EEF1A1;EEF1A1P5	P68104;Q5VTE0	165;165
501	di	K	1	5	NVSVK(1)DVRR	0.035692	LPGDNVGFNVKNVSVKDVRRGNVAGDSKNDP	P68104	318	Elongation factor 1-alpha 1;Putative elongation factor 1-alpha-like 3	EEF1A1;EEF1A1P5	P68104;Q5VTE0	318;318
502	di	K	1	7	EIAQDFK(1)TDLR	-0.19403	KLPFQRLVREIAQDFKTDLRFQSSAVMALQE	Q71DI3	80	Histone H3.2;Histone H3.1t;Histone H3.1;Histone H3;Histone H3.3	HIST2H3A;HIST3H3;HIST1H3A;H3F3B;H3F3A	Q71DI3;Q16695;P68431;K7EK07;P84243;K7EMV3;B4DEB1;K7ES00	80;80;80;80;80;80;80;80
503	di	K	0.618878	10	SAPATGGVK(0.373)K(0.619)PHR(0.008)	-0.77231	TKAARKSAPATGGVKKPHRYRPGTVALREIR	Q71DI3	38	Histone H3.2;Histone H3.1t;Histone H3.1;Histone H3	HIST2H3A;HIST3H3;HIST1H3A;HIST2H3PS2	Q71DI3;Q16695;P68431;Q5TEC6	38;38;38;38
504	di	K	1	8	TVTCMDNK(1)AWSGR(1)	2.1544	GYTLKGERTVTCMDNKAWSGRPASCVDMEPP	P78539-4	165	Sushi repeat-containing protein SRPX	SRPX	P78539-4;P78539-5;P78539-2;P78539	165;145;152;165
505	di	K	1	11	MDSTEPAYSEK(1)R	-2.8623	VGVNKMDSTEPAYSEKRYDEIVKEVSAYIKK	Q05639	165	Elongation factor 1-alpha 2	EEF1A2	Q05639	165
506	di	K	1	5	NVSVK(1)DIR	0.44597	LPGDNVGFNVKNVSVKDIRRGNVCGDSKSDP	Q05639	318	Elongation factor 1-alpha 2	EEF1A2	Q05639	318
507	di	K	1	5	IVGSK(1)PLYVALAQR	-0.87189	ATKAVTEMNGRIVGSKPLYVALAQRKEERKA	Q13310-2	361	Polyadenylate-binding protein 4	PABPC4	Q13310-2;Q13310-3;B1ANR0;Q13310;H0Y5F5;H0YEU6	361;361;361;361;263;88
508	di	K	0.999901	1	K(1)SLRTMEQQFQK	0.7521	KKLEADLEGKDEDAKKSLRTMEQQFQKMKIQ	Q5TB80-2	909	Centrosomal protein of 162 kDa	CEP162	Q5TB80-2;Q5TB80	909;985
509	di	K	1	8	LTPSRFMK(1)	-0.1815	KANSFESRLTPSRFMKALSYASLDKEDLLSP	Q6R327	1382	Rapamycin-insensitive companion of mTOR	RICTOR	Q6R327	1382
510	di	K	1	9	QSGYGGQTK(1)PIFR	0.071693	RRRYDRKQSGYGGQTKPIFRKKAKTTKKIVL	Q969Q0	53	60S ribosomal protein L36a-like;60S ribosomal protein L36a	RPL36AL;RPL36A;RPL36A-HNRNPH2	Q969Q0;J3KQN4;P83881;H7BZ11;H0Y5B4;H7BY91;H0Y3V9	53;89;53;64;72;63;64
511	di	K	0.5	10	TSGEIIRCEK(0.5)CK(0.5)	2.6708	GVEIEKTSGEIIRCEKCKRERELQQSLERER	Q9C098	141	Serine/threonine-protein kinase DCLK3	DCLK3	Q9C098	141
512	di	K	0.5	12	TSGEIIRCEK(0.5)CK(0.5)	2.6708	EIEKTSGEIIRCEKCKRERELQQSLERERLS	Q9C098	143	Serine/threonine-protein kinase DCLK3	DCLK3	Q9C098	143
513	di	K	0.999901	2	SK(1)IVEEMLK	-1.2925	KNEQEESIKERLAKSKIVEEMLKMKADLEEV	Q9NS87-2	1161	Kinesin-like protein KIF15	KIF15	Q9NS87-2;Q9NS87;H7BZT2;C9JKA9;Q9NS87-3	1161;1258;64;893;306
514	di	R	0.858053	11	AGAQMQR(0.142)DIER(0.858)	3.4027	LERARAGAQMQRDIEREAHRQAALARPAVPE	A0A044PY82	213	Uncharacterized protein LOC113230	MIR1199	A0A044PY82;Q96FF7	213;71
515	di	R	0.976264	5	TWFQR(0.976)WWDCSR(0.976)R(0.047)	2.523	AQKVLDRGCLRTWFQRWWDCSRRSAQQRLQL	H0Y5I7	343	Protein SFI1 homolog	SFI1	H0Y5I7;D3YTJ2;A8K8P3-4;A8K8P3-10;A8K8P3-3;A8K8P3-9;A8K8P3-2;A8K8P3	343;607;607;666;678;705;729;760
516	di	R	0.976264	11	TWFQR(0.976)WWDCSR(0.976)R(0.047)	2.523	RGCLRTWFQRWWDCSRRSAQQRLQLERAVQH	H0Y5I7	349	Protein SFI1 homolog	SFI1	H0Y5I7;D3YTJ2;A8K8P3-4;A8K8P3-10;A8K8P3-3;A8K8P3-9;A8K8P3-2;A8K8P3	349;613;613;672;684;711;735;766
517	di	R	0.710566	12	TWFQR(0.645)WWDCSR(0.645)R(0.711)	1.0455	GCLRTWFQRWWDCSRRSAQQRLQLERAVQHH	H0Y5I7	350	Protein SFI1 homolog	SFI1	H0Y5I7;D3YTJ2;A8K8P3-4;A8K8P3-10;A8K8P3-3;A8K8P3-9;A8K8P3-2;A8K8P3	350;614;614;673;685;712;736;767
518	di	R	0.958685	12	SYVTDDGQGMGR(0.959)GSR(0.823)PYR(0.219)	0.2387	DKEKSYVTDDGQGMGRGSRPYRNRGHGRRGP	A8MQB8	450	Fragile X mental retardation protein 1	FMR1	A8MQB8;G3V0J0;Q06787-8;Q06787-6;Q06787-2;Q06787-4;Q06787-5;G8JL90;Q06787-7;Q06787-3;Q06787;F8W871	450;448;450;471;450;471;471;450;471;471;471;118
519	di	R	0.822582	15	SYVTDDGQGMGR(0.959)GSR(0.823)PYR(0.219)	0.2387	KSYVTDDGQGMGRGSRPYRNRGHGRRGPGYT	A8MQB8	453	Fragile X mental retardation protein 1	FMR1	A8MQB8;G3V0J0;Q06787-8;Q06787-6;Q06787-2;Q06787-4;Q06787-5;G8JL90;Q06787-7;Q06787-3;Q06787;F8W871	453;451;453;474;453;474;474;453;474;474;474;121
520	di	R	1	7	GMPPPLR(1)GGPGGPGGPGGPMGR	0.88569	GGLPPREGRGMPPPLRGGPGGPGGPGGPMGR	H7BY36	127	RNA-binding protein EWS	EWSR1	H7BY36;C9JGE3;B0QYK0;Q01844-2;Q01844-6;Q01844-3;Q01844;Q01844-5	127;398;433;398;415;470;471;476
521	di	R	1	1	R(1)GGPGGPPGPLMEQMGGR	-1.5086	RGGRGMDRGGFGGGRRGGPGGPPGPLMEQMG	H7BY36	267	RNA-binding protein EWS	EWSR1	H7BY36;C9JGE3;B0QYK0;Q01844-2;Q01844-6;Q01844-3;Q01844;Q01844-5	267;542;577;542;559;614;615;620
522	di	R	0.912016	8	GPPPPGMR(0.912)PPR(0.088)P	3.4884	RPPPPGIRGPPPPGMRPPRP___________	P63162	236	Small nuclear ribonucleoprotein-associated protein N;Small nuclear ribonucleoprotein-associated proteins B and B'	SNRPN;SNRPB	P63162;P14678;B3KVR1;P14678-3	236;236;240;285
523	di	R	0.440833	5	SVFCR(0.441)IR(0.441)GGPDR(0.118)	-0.67024	GSGLRDFTQEKSVFCRIRGGPDRDPGPRYQP	J3QSH9	300	Period circadian protein homolog 1	PER1	J3QSH9;J3KTM2;J3KRL7;B4DI49;O15534	300;300;280;284;300
524	di	R	0.440833	7	SVFCR(0.441)IR(0.441)GGPDR(0.118)	-0.67024	GLRDFTQEKSVFCRIRGGPDRDPGPRYQPFR	J3QSH9	302	Period circadian protein homolog 1	PER1	J3QSH9;J3KTM2;J3KRL7;B4DI49;O15534	302;302;282;286;302
525	di	R	1	10	TALLQDGNSR(1)	2.0451	LRTAQKTALLQDGNSRVPTGSFVFFPQGPAL	B4DJT1	195			B4DJT1	195
526	di	R	0.999999	1	R(1)GGFNTFR	0.73406	GGMKDDRRDRYSAGKRGGFNTFRDRENYDRG	B4DLW8	423	Probable ATP-dependent RNA helicase DDX5	DDX5	B4DLW8;P17844;J3KTA4	423;502;502
527	di	R	0.999999	1	R(1)GGHQNSYKPY	-0.58618	GRGGDQQSGYGKVSRRGGHQNSYKPY_____	H0YA96	200	Heterogeneous nuclear ribonucleoprotein D0	HNRNPD	H0YA96;B4DTC3;Q14103-4;Q14103-3;Q14103-2;Q14103;F5H6R6	200;293;277;296;326;345;191
528	di	R	0.82691	13	AAAPVAAGSGAGR(0.827)GR(0.173)	-1.6596	__MAAAPVAAGSGAGRGRRSAATVAAWGGWG	B4E0Q1	14	Short transient receptor potential channel 4-associated protein	TRPC4AP	B4E0Q1;Q8TEL6-2;Q8TEL6-3;Q8TEL6	14;14;14;14
529	di	R	1	6	GGGGFR(1)GR(1)GGGGGFQR	0.11699	PPPEKRFDNRGGGGFRGRGGGGGFQRYENRG	M0R3F1	467	Heterogeneous nuclear ribonucleoprotein U-like protein 1	HNRNPUL1	M0R3F1;B7Z4B8;Q9BUJ2-4;Q9BUJ2-2;Q9BUJ2;Q9BUJ2-3;Q9BUJ2-5	467;529;518;618;618;504;142
530	di	R	1	8	GGGGFR(1)GR(1)GGGGGFQR	0.11699	PEKRFDNRGGGGFRGRGGGGGFQRYENRGPP	M0R3F1	469	Heterogeneous nuclear ribonucleoprotein U-like protein 1	HNRNPUL1	M0R3F1;B7Z4B8;Q9BUJ2-4;Q9BUJ2-2;Q9BUJ2;Q9BUJ2-3;Q9BUJ2-5	469;531;520;620;620;506;144
531	di	R	0.999907	10	EEVRAALEQR(1)	0.38589	DLEKQKEEVRAALEQREQDAVDQVKVIMDAL	B7Z8U9	68	Tripartite motif-containing protein 29	TRIM29	B7Z8U9;E9PRL4;Q14134-2;Q14134	68;74;335;335
532	di	R	0.980792	13	EVYQQQQYGSGGR(0.981)GNR(0.019)	-1.7618	QPKEVYQQQQYGSGGRGNRNRGNRGSGGGQG	D6R9P3	245	Heterogeneous nuclear ribonucleoprotein A/B	HNRNPAB	D6R9P3;D6RD18;D6RBZ0;Q99729-3;Q99729-2;Q99729-4;Q99729	245;245;245;245;245;246;245
533	di	R	0.999729	1	R(1)GGHQNNYKPY	0.56304	SGGGQGSTNYGKSQRRGGHQNNYKPY_____	D6R9P3	270	Heterogeneous nuclear ribonucleoprotein A/B	HNRNPAB	D6R9P3;D6RD18;D6RBZ0;Q99729-3;Q99729-2;Q99729-4;Q99729	270;273;317;275;322;276;322
534	di	R	1	8	PVGVVVPR(1)GTPTPR(1)	0.23042	GRGGVTARPVGVVVPRGTPTPRGVLSTRGPV	H0YAQ1	135	KH domain-containing, RNA-binding, signal transduction-associated protein 3	KHDRBS3	H0YAQ1;H0YAQ3;E5RJZ9;O75525-2;O75525	135;145;192;220;220
535	di	R	1	14	PVGVVVPR(1)GTPTPR(1)	0.23042	ARPVGVVVPRGTPTPRGVLSTRGPVSRGRGL	H0YAQ1	141	KH domain-containing, RNA-binding, signal transduction-associated protein 3	KHDRBS3	H0YAQ1;H0YAQ3;E5RJZ9;O75525-2;O75525	141;151;198;226;226
536	di	R	0.98249	8	MNTPSQPR(0.982)QHFYPSR(0.018)	0.17905	________MNTPSQPRQHFYPSRAQPPSSAA	E7EUU4	8	Eukaryotic translation initiation factor 4 gamma 1	EIF4G1	E7EUU4;Q04637-8;C9J2Z7;C9JIH5;C9JHW9;C9JWH9;Q04637-3;Q04637	8;48;48;8;8;48;8;48
537	di	R	0.900422	15	MNTPSQPR(0.099)QHFYPSR(0.9)AQPPSSAASR	0.75688	_MNTPSQPRQHFYPSRAQPPSSAASRVQSAA	E7EUU4	15	Eukaryotic translation initiation factor 4 gamma 1	EIF4G1	E7EUU4;Q04637-8;C9J2Z7;C9JIH5;C9JHW9;C9JWH9;Q04637-3;Q04637	15;55;55;15;15;55;15;55
538	di	R	1	5	PGAGR(1)GYNSIGR(1)GAGFER	1.1015	MAMQRPGPYDRPGAGRGYNSIGRGAGFERMR	E9PCY7	217	Heterogeneous nuclear ribonucleoprotein H;Heterogeneous nuclear ribonucleoprotein H, N-terminally processed;Heterogeneous nuclear ribonucleoprotein H2;Heterogeneous nuclear ribonucleoprotein H2, N-terminally processed	HNRNPH1;HNRNPH2	E9PCY7;G8JLB6;P31943;H0YB39;H0YBD7;P55795	217;217;217;92;31;217
539	di	R	0.999999	12	PGAGR(1)GYNSIGR(1)GAGFER	1.1015	PYDRPGAGRGYNSIGRGAGFERMRRGAYGGG	E9PCY7	224	Heterogeneous nuclear ribonucleoprotein H;Heterogeneous nuclear ribonucleoprotein H, N-terminally processed;Heterogeneous nuclear ribonucleoprotein H2;Heterogeneous nuclear ribonucleoprotein H2, N-terminally processed	HNRNPH1;HNRNPH2	E9PCY7;G8JLB6;P31943;H0YB39;H0YBD7;P55795	224;224;224;99;38;224
540	di	R	0.813402	8	SVAFAAPR(0.813)QR(0.187)	-0.17291	_______MSVAFAAPRQRGKGEITPAAIQKV	F5GWN1	9	Protein SSXT	CD63;SS18	F5GWN1;J3KRP6;J3QS72;X6R3J2;J3QQM2;J3KT74;J3QQW2;Q15532-2;Q15532	9;9;9;9;9;9;9;9;9
541	di	R	0.999616	4	SLER(1)TQQLELKK	-0.73161	EEEERLEAMMRRSLERTQQLELKKKYSWGAP	H0YJ61	72	MAP7 domain-containing protein 2	MAP7D2	H0YJ61;F5GYC2;Q96T17-3;Q96T17-5;Q96T17-4;Q96T17;Q96T17-2	72;8;137;93;137;137;137
542	di	R	0.999937	2	MR(1)NLFER	-0.6664	GANGDTGKRELKQKMRNLFERGSTDRFFLET	J3QKX9	988	Lipoxygenase homology domain-containing protein 1	LOXHD1	J3QKX9;J3KRE7;F8WA52;H7BZ41;F5GZB4;Q8IVV2-4;Q8IVV2-5;Q8IVV2-3;Q8IVV2	988;1022;1066;1989;2133;434;434;1084;1917
543	di	R	0.56584	8	SAEIQK(0.434)DR(0.566)	3.7613	RTATKPARSAEIQKDRELSTKEHQPF_____	F5H2X6	117		P2RX7	F5H2X6	117
544	di	R	1	6	QTPGGR(1)GVPLLNVGSR	-0.42144	FTPAFADFGRQTPGGRGVPLLNVGSRRSQPG	F5H564	296	Eukaryotic translation initiation factor 4 gamma 3	EIF4G3	F5H564;O43432-4;O43432;O43432-3	296;412;692;698
545	di	R	0.988186	7	SGGPSGR(0.988)GTER(0.957)GR(0.054)	-0.080664	QENGLDGTKSGGPSGRGTERGRRGRGRGRGG	F8W726	179	Ubiquitin-associated protein 2-like	UBAP2L	F8W726;Q14157-4;Q14157-1;Q14157-3;Q14157;Q14157-5;Q5VU77;Q5VU81;Q5VU80;Q5VU79;Q5VU78	179;161;168;168;168;168;179;168;168;161;168
546	di	R	0.957489	11	SGGPSGR(0.988)GTER(0.957)GR(0.054)	-0.080664	LDGTKSGGPSGRGTERGRRGRGRGRGGSGRR	F8W726	183	Ubiquitin-associated protein 2-like	UBAP2L	F8W726;Q14157-4;Q14157-1;Q14157-3;Q14157;Q14157-5;Q5VU77;Q5VU81;Q5VU80;Q5VU79;Q5VU78	183;165;172;172;172;172;183;172;172;165;172
547	di	R	0.549627	13	SGGPSGR(0.901)GTER(0.55)GR(0.55)	-0.51517	GTKSGGPSGRGTERGRRGRGRGRGGSGRRGG	F8W726	185	Ubiquitin-associated protein 2-like	UBAP2L	F8W726;Q14157-4;Q14157-1;Q14157-3;Q14157;Q14157-5;Q5VU77;Q5VU81;Q5VU80;Q5VU79;Q5VU78	185;167;174;174;174;174;185;174;174;167;174
548	di	R	0.999996	1	R(1)GGPLMCR	-0.37169	RQHKQGRYSSRRGGRRGGPLMCRGVGDQRRE	H0Y3K4	51	RNA-binding protein 33	RBM33	H0Y3K4;Q96EV2;H7BXM6;H7C0H2	51;279;234;170
549	di	R	0.999999	2	PR(1)PAAAAAAATPAVR	-0.12249	______________PRPAAAAAAATPAVRTV	H0YAS7	2		PABPC1	H0YAS7	2
550	di	R	1	5	SSSSR(1)GPGAGAR	0.97288	__________MSSSSRGPGAGARRRRTRCRR	H3BQP6	6		FBXL19	H3BQP6;H3BME1;H3BPZ0	6;6;6
551	di	R	1	3	GGR(1)GR(1)GGSGGGGGGGGGGYNR	0.48617	GGGGSGGYGQQDRGGRGRGGSGGGGGGGGGG	H3BPE7	216	RNA-binding protein FUS	FUS	H3BPE7;P35637-2;P35637;H3BNZ4	216;215;216;216
552	di	R	1	5	GGR(1)GR(1)GGSGGGGGGGGGGYNR	0.48617	GGSGGYGQQDRGGRGRGGSGGGGGGGGGGYN	H3BPE7	218	RNA-binding protein FUS	FUS	H3BPE7;P35637-2;P35637;H3BNZ4	218;217;218;218
553	di	R	0.994984	6	VREGPR(0.995)GGVR(0.005)	0.4432	EGKYIPLPQRVREGPRGGVRCSSSRGGRPGL	H3BUF6	361	Ataxin-2-like protein	ATXN2L	H3BUF6;Q8WWM7-6;Q8WWM7-8;Q8WWM7-5;Q8WWM7-4;Q8WWM7-9;Q8WWM7-2;Q8WWM7;Q8WWM7-3;H3BSK9	361;361;361;361;361;361;361;361;361;301
554	di	R	1	5	AGAGR(1)GAAVSR	1.0701	__________MAGAGRGAAVSRVQAGPGSPR	I3L0U5	6	Coiled-coil domain-containing protein 137	CCDC137	I3L0U5;Q6PK04	6;6
555	di	R	1	7	EIQTALR(1)	1.3309	VAESNKINKEIQTALRHKSEIEHHRNKIRLR	J3QSR7	1473	UPF0606 protein KIAA1549	KIAA1549	J3QSR7;Q9HCM3-3;Q9HCM3-4;Q9HCM3-2;Q9HCM3	1473;307;307;1523;1523
556	di	R	1	7	AIDPK(1)QR(1)	1.5153	AVDQTYKLKAIDPKQRELSFIVNSSVFLEEV	J3QTJ6	5026	Fibrous sheath-interacting protein 2	FSIP2	J3QTJ6;Q5CZC0	5026;4937
557	di	R	1	3	ASR(1)GGGNHQNNYQPY	0.35164	RGRGRGQQSTYGKASRGGGNHQNNYQPY___;YADYSGQQSTYGKASRGGGNHQNNYQPY___	O14979-3	232	Heterogeneous nuclear ribonucleoprotein D-like	HNRNPDL	O14979;O14979-3;O14979-2	408;232;289
558	di	R	0.999982	6	LQAEPR(1)CVAEEER(1)GLR	1.4378	WEETSFQLDRLQAEPRCVAEEERGLRERMGP	O15067	1026	Phosphoribosylformylglycinamidine synthase	PFAS	O15067;F5GWT9;H0YGH1	1026;602;130
559	di	R	0.999961	13	LQAEPR(1)CVAEEER(1)GLR	1.4378	LDRLQAEPRCVAEEERGLRERMGPSYCLPPT	O15067	1033	Phosphoribosylformylglycinamidine synthase	PFAS	O15067;F5GWT9;H0YGH1	1033;609;137
560	di	R	0.999993	4	FAQR(1)NLR	-0.43441	TQKTAYQRNRMRFAQRNLRRDKDRRNMLQFN	O15371	103	Eukaryotic translation initiation factor 3 subunit D	EIF3D	O15371;B0QYA5;B0QYA6;B0QYA7;B0QYA8	103;103;103;103;103
561	di	R	1	6	AGYSQR(1)GGPGSAR	1.8285	GRGAAPPRGRAGYSQRGGPGSARGVRGARGG	O60506-3	526	Heterogeneous nuclear ribonucleoprotein Q	SYNCRIP	O60506-3;O60506;O60506-4;O60506-2;O60506-5;H0YAA0	526;526;491;491;374;62
562	di	R	0.997863	11	NTK(0.002)NGLSPGMR(0.998)	-0.86408	DLPLKNTKNGLSPGMRTCFLYLRFFPCLSWM	O60756	40	Putative protein BCE-1	BCE1	O60756	40
563	di	R	0.952762	11	KCDPHIGLLHR(0.953)GTEK(0.047)	-0.19094	GEMVRKCDPHIGLLHRGTEKLIEYKTYLQAL	O75306-2	118	NADH dehydrogenase [ubiquinone] iron-sulfur protein 2, mitochondrial	NDUFS2	O75306-2;O75306;B7Z9L2	118;118;20
564	di	R	1	7	GGNFSGR(1)GGFGGSR	0.29659	FGGNDNFGRGGNFSGRGGFGGSRGGGGYGGS	P09651-2	225	Heterogeneous nuclear ribonucleoprotein A1;Heterogeneous nuclear ribonucleoprotein A1, N-terminally processed	HNRNPA1	P09651-2;P09651;H0YH80	225;225;96
565	di	R	0.999273	11	QEMASASSSQR(0.999)GR(0.001)	-0.063217	KALSKQEMASASSSQRGRSGSGNFGGGRGGG	P09651-2	194	Heterogeneous nuclear ribonucleoprotein A1;Heterogeneous nuclear ribonucleoprotein A1, N-terminally processed;Heterogeneous nuclear ribonucleoprotein A1-like 2	HNRNPA1;HNRNPA1L2	P09651-2;P09651;F8W6I7;P09651-3;H0YH80;F8VZ49;Q32P51	194;194;194;194;65;213;194
566	di	R	0.699926	13	QEMASASSSQR(0.3)GR(0.7)	-0.21126	LSKQEMASASSSQRGRSGSGNFGGGRGGGFG	P09651-2	196	Heterogeneous nuclear ribonucleoprotein A1;Heterogeneous nuclear ribonucleoprotein A1, N-terminally processed;Heterogeneous nuclear ribonucleoprotein A1-like 2	HNRNPA1;HNRNPA1L2	P09651-2;P09651;F8W6I7;P09651-3;H0YH80;F8VZ49;Q32P51	196;196;196;196;67;215;196
567	di	R	1	10	SGSGNFGGGR(1)GGGFGGNDNFGR	0.39146	SSQRGRSGSGNFGGGRGGGFGGNDNFGRGGN	P09651-2	206	Heterogeneous nuclear ribonucleoprotein A1;Heterogeneous nuclear ribonucleoprotein A1, N-terminally processed	HNRNPA1	P09651-2;P09651;F8W6I7;H0YH80	206;206;206;77
568	di	R	1	22	SGSGNFGGGR(1)GGGFGGNDNFGR(1)	0.4503	GGGRGGGFGGNDNFGRGGNFSGRGGFGGSRG	P09651-2	218	Heterogeneous nuclear ribonucleoprotein A1;Heterogeneous nuclear ribonucleoprotein A1, N-terminally processed	HNRNPA1	P09651-2;P09651;F8W6I7;H0YH80	218;218;218;89
569	di	R	1	7	LFITMSR(1)	4.197	___MALGQKLFITMSRGAGRLQGTLWALVFL	P10767	13	Fibroblast growth factor 6	FGF6	P10767	13
570	di	R	1	14	MLPTQAGAAAALGR(1)GSALGGSLNR	-0.054613	__MLPTQAGAAAALGRGSALGGSLNRTPTGR	P11831	14	Serum response factor	SRF	P11831	14
571	di	R	1	8	PASSQVPR(1)VMSTQR	1.449	RPPFSTMRPASSQVPRVMSTQRVANTSTQTM	P11940	475	Polyadenylate-binding protein 1;Polyadenylate-binding protein 3	PABPC1;PABPC3	P11940;E7EQV3;E7ERJ7;Q9H361;H0YB75;H0YAW6	475;430;443;469;22;128
572	di	R	1	12	VANTSTQTMGPR(1)PAAAAAAATPAVR	0.62768	STQRVANTSTQTMGPRPAAAAAAATPAVRTV	P11940	493	Polyadenylate-binding protein 1	PABPC1	P11940;E7EQV3;E7ERJ7;H0YB75;H0YAS6;H0YAW6	493;448;461;40;26;146
573	di	R	0.99635	11	QR(0.003)GVSHAMGGR(0.996)GGINR	-0.34478	RQFNRQRGVSHAMGGRGGINRGNIN______	P12270	2354	Nucleoprotein TPR	TPR	P12270	2354
574	di	R	1	21	ADDAGAAGGPGGPGGPGMGNR(1)GGFR(1)GGFGSGIR(1)	-0.0067662	AAGGPGGPGGPGMGNRGGFRGGFGSGIRGRG	P15880	22	40S ribosomal protein S2	RPS2	P15880;E9PMM9;E9PM36;E9PPT0;E9PQD7	22;22;22;22;22
575	di	R	1	25	ADDAGAAGGPGGPGGPGMGNR(1)GGFR(1)GGFGSGIR(1)	-0.0067662	PGGPGGPGMGNRGGFRGGFGSGIRGRGRGRG	P15880	26	40S ribosomal protein S2	RPS2	P15880;E9PMM9;E9PM36;E9PPT0;E9PQD7	26;26;26;26;26
576	di	R	1	33	ADDAGAAGGPGGPGGPGMGNR(1)GGFR(1)GGFGSGIR(1)	-0.0067662	MGNRGGFRGGFGSGIRGRGRGRGRGRGRGRG	P15880	34	40S ribosomal protein S2	RPS2	P15880;E9PMM9;E9PM36;E9PPT0;E9PQD7	34;34;34;34;34
577	di	R	0.977962	1	R(0.978)PQYR(0.022)PQYR	-0.70073	PATDRQFSGARNQLRRPQYRPQYRQRRFPPY	P16989-3	225	Y-box-binding protein 3	YBX3	P16989-3;P16989;H0YG22	225;225;55
578	di	R	1	1	R(1)GGGGGR(1)GGLHDFR	0.32428	DRFRSRGGGGGGFHRRGGGGGRGGLHDFRSP	P23246	19	Splicing factor, proline- and glutamine-rich	SFPQ	P23246;P23246-2	19;19
579	di	R	0.999999	7	R(1)GGGGGR(1)GGLHDFR	0.32428	GGGGGGFHRRGGGGGRGGLHDFRSPPPGMGL	P23246	25	Splicing factor, proline- and glutamine-rich	SFPQ	P23246;P23246-2	25;25
580	di	R	0.999998	2	SR(1)GGGGGGFHR	-0.38067	_______MSRDRFRSRGGGGGGFHRRGGGGG	P23246	9	Splicing factor, proline- and glutamine-rich	SFPQ	P23246;P23246-2	9;9
581	di	R	0.99948	8	DSYSSSSR(0.999)GAPR(0.001)	0.56985	ERGYPPPRDSYSSSSRGAPRGGGRGGSRSDR	P38159	369	RNA-binding motif protein, X chromosome;RNA-binding motif protein, X chromosome, N-terminally processed	RBMX	P38159;P38159-2;B3KRG5;H3BUY5	369;356;234;241
582	di	R	1	3	GLR(1)GGR(1)GGSGGTR	0.26308	GPPPPPRSRGPPRGLRGGRGGSGGTRGPPSR	P38159	110	RNA-binding motif protein, X chromosome;RNA-binding motif protein, X chromosome, N-terminally processed	RBMX	P38159;P38159-2;H0Y6E7;H3BT71	110;97;112;110
583	di	R	1	6	GLR(1)GGR(1)GGSGGTR	0.26308	PPPRSRGPPRGLRGGRGGSGGTRGPPSRGGH	P38159	113	RNA-binding motif protein, X chromosome;RNA-binding motif protein, X chromosome, N-terminally processed	RBMX	P38159;P38159-2;H0Y6E7;H3BT71	113;100;115;113
584	di	R	0.975867	8	TVGLFAGR(0.976)GR(0.024)	-0.11209	ECAAGFLKTVGLFAGRGRPGPGLSSQTAGAA	P38432	350	Coilin	COIL	P38432	350
585	di	R	1	5	GGFGR(1)GR(1)GQPPQ	-0.54477	GAGSATEFQFRGGFGRGRGQPPQ________	P46783	158	40S ribosomal protein S10	RPS10	P46783	158
586	di	R	1	7	GGFGR(1)GR(1)GQPPQ	-0.54477	GSATEFQFRGGFGRGRGQPPQ__________	P46783	160	40S ribosomal protein S10	RPS10	P46783	160
587	di	R	0.999896	6	GTYGGR(1)GR(1)GAR	0.68244	EYFARGRGFRGTYGGRGRGARSREFRSYREF	P48634	1045	Protein PRRC2A	PRRC2A	P48634	1045
588	di	R	0.999768	8	GTYGGR(1)GR(1)GAR	0.68244	FARGRGFRGTYGGRGRGARSREFRSYREFRG	P48634	1047	Protein PRRC2A	PRRC2A	P48634	1047
589	di	R	0.9992	1	R(0.999)GGFDR(0.001)PSYDR	-0.15411	RAQSYRDKKDHSSSRRGGFDRPSYDRKSDRP	P49750-3	1563	YLP motif-containing protein 1	YLPM1	P49750-3;P49750;P49750-4;H0YIQ2;F8VU51;H0YI23	1563;1563;1758;1311;1052;167
590	di	R	1	10	QEMQSAGSQR(1)GR(1)	0.77251	KKALSKQEMQSAGSQRGRGGGSGNFMGRGGN	P51991	214	Heterogeneous nuclear ribonucleoprotein A3	HNRNPA3	P51991;P51991-2;H7C1J8	214;192;22
591	di	R	1	12	QEMQSAGSQR(1)GR(1)	0.77251	ALSKQEMQSAGSQRGRGGGSGNFMGRGGNFG	P51991	216	Heterogeneous nuclear ribonucleoprotein A3	HNRNPA3	P51991;P51991-2;H7C1J8	216;194;24
592	di	R	0.99991	8	ECPTGGGR(1)GR(1)GMR	0.018091	GRSGHWARECPTGGGRGRGMRSRGRGGFTSD	P62633-3	25	Cellular nucleic acid-binding protein	CNBP	P62633-3;P62633;P62633-4;P62633-6;P62633-7;P62633-2;P62633-8;P62633-5;D6RAT4	25;25;25;25;25;25;25;25;25
593	di	R	0.999744	10	ECPTGGGR(1)GR(1)GMR	0.018091	SGHWARECPTGGGRGRGMRSRGRGGFTSDRD	P62633-3	27	Cellular nucleic acid-binding protein	CNBP	P62633-3;P62633;P62633-4;P62633-6;P62633-7;P62633-2;P62633-8;P62633-5;D6RAT4	27;27;27;27;27;27;27;27;27
594	di	R	0.99999	2	SR(1)GR(1)GGFTSDR	-0.15896	RECPTGGGRGRGMRSRGRGGFTSDRDICYRC	P62633-3	32	Cellular nucleic acid-binding protein	CNBP	P62633-3;P62633;P62633-4;P62633-6	32;32;32;32
595	di	R	0.99998	4	SR(1)GR(1)GGFTSDR	-0.15896	CPTGGGRGRGMRSRGRGGFTSDRDICYRCGE	P62633-3	34	Cellular nucleic acid-binding protein	CNBP	P62633-3;P62633;P62633-4;P62633-6	34;34;34;34
596	di	R	1	13	TVTCMDNK(1)AWSGR(1)	2.1544	GERTVTCMDNKAWSGRPASCVDMEPPRIKCP	P78539-4	170	Sushi repeat-containing protein SRPX	SRPX	P78539-4;P78539-5;P78539-2;P78539	170;150;157;170
597	di	R	0.999807	3	GTR(1)GGGFGAHGRGR	-0.11758	RQIRVDHAGKSARGTRGGGFGAHGRGRSYSR	P98179	90	Putative RNA-binding protein 3	RBM3	P98179	90
598	di	R	1	4	SYSR(1)GGGDQGYGSGR	-0.8183	RGGGFGAHGRGRSYSRGGGDQGYGSGRYYDS	P98179	105	Putative RNA-binding protein 3	RBM3	P98179	105
599	di	R	0.999993	7	GGAPGNR(1)GGYNR	-0.82994	FNMRGGNFRGGAPGNRGGYNRRGNMPQRGGG	Q00839-2	708	Heterogeneous nuclear ribonucleoprotein U	HNRNPU	Q00839-2;Q00839	708;727
600	di	R	1	7	R(1)GNMPQR(1)GGGGGGSGGIGYPYPR	0.63557	PGNRGGYNRRGNMPQRGGGGGGSGGIGYPYP	Q00839-2	720	Heterogeneous nuclear ribonucleoprotein U	HNRNPU	Q00839-2;Q00839	720;739
601	di	R	1	1	R(1)GNMPQR(1)GGGGGGSGGIGYPYPR	0.63557	NFRGGAPGNRGGYNRRGNMPQRGGGGGGSGG	Q00839-2	714	Heterogeneous nuclear ribonucleoprotein U	HNRNPU	Q00839-2;Q00839	714;733
602	di	R	0.999983	2	GR(1)GVGPPR(0.999)GALVR(0.001)	-0.56433	RGRGAAPPPPPVPRGRGVGPPRGALVRGTPV	Q07666	304	KH domain-containing, RNA-binding, signal transduction-associated protein 1	KHDRBS1	Q07666;Q07666-3;Q07666-2	304;265;279
603	di	R	0.999393	8	GR(1)GVGPPR(0.999)GALVR(0.001)	-0.56433	PPPPPVPRGRGVGPPRGALVRGTPVRGAITR	Q07666	310	KH domain-containing, RNA-binding, signal transduction-associated protein 1	KHDRBS1	Q07666;Q07666-3;Q07666-2	310;271;285
604	di	R	0.999958	9	GVPPPPTVR(1)GAPAPR(0.941)AR(0.059)	0.092118	RGATVTRGVPPPPTVRGAPAPRARTAGIQRI	Q07666	340	KH domain-containing, RNA-binding, signal transduction-associated protein 1	KHDRBS1	Q07666;Q07666-3;Q07666-2	340;301;315
605	di	R	0.941082	15	GVPPPPTVR(1)GAPAPR(0.941)AR(0.059)	0.092118	RGVPPPPTVRGAPAPRARTAGIQRIPLPPPP	Q07666	346	KH domain-containing, RNA-binding, signal transduction-associated protein 1	KHDRBS1	Q07666;Q07666-3;Q07666-2	346;307;321
606	di	R	1	5	GVPVR(1)GR(1)GAAPPPPPVPR(1)	-0.51821	LNGVPEPSRGRGVPVRGRGAAPPPPPVPRGR	Q07666	289	KH domain-containing, RNA-binding, signal transduction-associated protein 1	KHDRBS1	Q07666;Q07666-3;Q07666-2	289;250;264
607	di	R	1	7	GVPVR(1)GR(1)GAAPPPPPVPR(1)	-0.51821	GVPEPSRGRGVPVRGRGAAPPPPPVPRGRGV	Q07666	291	KH domain-containing, RNA-binding, signal transduction-associated protein 1	KHDRBS1	Q07666;Q07666-3;Q07666-2	291;252;266
608	di	R	1	18	GVPVR(1)GR(1)GAAPPPPPVPR(1)	-0.51821	PVRGRGAAPPPPPVPRGRGVGPPRGALVRGT	Q07666	302	KH domain-containing, RNA-binding, signal transduction-associated protein 1	KHDRBS1	Q07666;Q07666-3;Q07666-2	302;263;277
609	di	R	0.999956	2	SR(1)GGGGGSR(0.998)GGAR(0.002)	-0.91555	VRQTPSRQPPLPHRSRGGGGGSRGGARASPA	Q07666	45	KH domain-containing, RNA-binding, signal transduction-associated protein 1	KHDRBS1	Q07666;Q07666-3	45;45
610	di	R	0.998358	9	SR(1)GGGGGSR(0.998)GGAR(0.002)	-0.91555	QPPLPHRSRGGGGGSRGGARASPATQPPPLL	Q07666	52	KH domain-containing, RNA-binding, signal transduction-associated protein 1	KHDRBS1	Q07666;Q07666-3	52;52
611	di	R	1	7	SNSGPYR(1)GGYGGGGGYGGSSF	0.25905	GGGSSWGGRSNSGPYRGGYGGGGGYGGSSF_	Q13151	291	Heterogeneous nuclear ribonucleoprotein A0	HNRNPA0	Q13151	291
612	di	R	1	8	LRGPGGPR(1)GGLGGGMR	-0.16763	EGDRRDNRLRGPGGPRGGLGGGMRGPPRGGM	Q13283	435	Ras GTPase-activating protein-binding protein 1	G3BP1	Q13283;F5H4D6	435;253
613	di	R	1	7	PGFGVGR(1)GLAPR	0.23739	PPRGGMVQKPGFGVGRGLAPRQ_________	Q13283	460	Ras GTPase-activating protein-binding protein 1	G3BP1	Q13283;F5H4D6	460;278
614	di	R	0.999865	9	AAVAAAAPR(1)AVAPYK	0.35005	VQNLAPRAAVAAAAPRAVAPYKYASSVRSPH	Q13310-2	505	Polyadenylate-binding protein 4	PABPC4	Q13310-2;Q13310-3;B1ANR0;Q13310;H0Y5F5;H0YEU6;H0Y6X6	505;534;489;518;436;227;73
615	di	R	0.711369	18	ADFDTYDDRAYSSFGGGR(0.711)GSR(0.289)	-0.11539	FDTYDDRAYSSFGGGRGSRGSAGGHGSRSQK	Q15056-2	19	Eukaryotic translation initiation factor 4H	EIF4H	Q15056-2;Q15056	19;19
616	di	R	0.634223	21	ADFDTYDDRAYSSFGGGR(0.366)GSR(0.634)	0.30201	YDDRAYSSFGGGRGSRGSAGGHGSRSQKELP	Q15056-2	22	Eukaryotic translation initiation factor 4H	EIF4H	Q15056-2;Q15056	22;22
617	di	R	0.960073	8	AAFPQGGR(0.96)GR(0.966)GR(0.074)	-0.62916	GPPGGSSRAAFPQGGRGRGRFPGAVPGGDRF	Q16630	202	Cleavage and polyadenylation specificity factor subunit 6	CPSF6	Q16630;Q16630-2	202;202
618	di	R	0.965891	10	AAFPQGGR(0.96)GR(0.966)GR(0.074)	-0.62916	PGGSSRAAFPQGGRGRGRFPGAVPGGDRFPG	Q16630	204	Cleavage and polyadenylation specificity factor subunit 6	CPSF6	Q16630;Q16630-2	204;204
619	di	R	1	2	SR(1)GQGYVGGQRR	0.071815	NRRNNRNKRNRQNRSRGQGYVGGQRRGYDNR	Q1KMD3	656	Heterogeneous nuclear ribonucleoprotein U-like protein 2	HNRNPUL2;HNRNPUL2-BSCL2	Q1KMD3;H3BQZ7	656;656
620	di	R	0.499998	2	MR(0.5)GGR(0.5)QAALR	0.26055	LKKQVVMQAMGSCRMRGGRQAALREVEQIQA	Q2M329	348	Coiled-coil domain-containing protein 96	CCDC96	Q2M329	348
621	di	R	0.499998	5	MR(0.5)GGR(0.5)QAALR	0.26055	QVVMQAMGSCRMRGGRQAALREVEQIQALED	Q2M329	351	Coiled-coil domain-containing protein 96	CCDC96	Q2M329	351
622	di	R	1	2	GR(1)GTPAYPESTFGSR	0.92403	FSSPHMKPAPVGSRGRGTPAYPESTFGSRNY	Q5BKZ1	175	DBIRD complex subunit ZNF326	ZNF326	Q5BKZ1	175
623	di	R	1	9	QSTLIQHQR(1)	2.3694	CGKYFTRQSTLIQHQRIHTGERPYKCNECIK	Q5EBM4	146	Putative zinc finger protein 542	ZNF542P	Q5EBM4	146
624	di	R	0.934764	8	PSSGSVSR(0.935)SR(0.065)	0.1918	_______MPSSGSVSRSRQRGRSMASRGFDG	Q5SWX9	9		TPR	Q5SWX9	9
625	di	R	0.999935	2	HR(1)ATQSGQR	-0.75714	SGDSVARSHVQWLRHRATQSGQRRWRHALHR	Q5SXM2	722	snRNA-activating protein complex subunit 4	SNAPC4	Q5SXM2	722
626	di	R	0.99993	10	RGPPPPPPGR(1)GGR(1)	0.37327	DDMSPRRGPPPPPPGRGGRGGSRARNLPLPP	Q5T6W5	261	Heterogeneous nuclear ribonucleoprotein K	HNRNPK	Q5T6W5;P61978-3;P61978;P61978-2;Q5T6W2;Q5T6W1	261;272;296;296;272;227
627	di	R	0.999929	13	RGPPPPPPGR(1)GGR(1)	0.37327	SPRRGPPPPPPGRGGRGGSRARNLPLPPPPP	Q5T6W5	264	Heterogeneous nuclear ribonucleoprotein K	HNRNPK	Q5T6W5;P61978-3;P61978;P61978-2;Q5T6W2;Q5T6W1	264;275;299;299;275;230
628	di	R	0.873494	16	GPPPPPPGR(0.274)GGR(0.852)GGSR(0.873)	0.10524	GPPPPPPGRGGRGGSRARNLPLPPPPPPRGG	Q5T6W5	268	Heterogeneous nuclear ribonucleoprotein K	HNRNPK	Q5T6W5;P61978-3;P61978;P61978-2;Q5T6W2;Q5T6W1	268;279;303;303;279;234
629	di	R	0.969846	5	MPPGR(0.97)GGR(0.03)PMPPSR	-0.88278	FPMRGRGGFDRMPPGRGGRPMPPSRRDYDDM	Q5T6W5	233	Heterogeneous nuclear ribonucleoprotein K	HNRNPK	Q5T6W5;P61978-3;P61978;P61978-2;Q5T6W2;Q5T6W1	233;244;268;268;244;199
630	di	R	0.868382	8	MPPGR(0.132)GGR(0.868)PMPPSR	-0.68927	RGRGGFDRMPPGRGGRPMPPSRRDYDDMSPR	Q5T6W5	236	Heterogeneous nuclear ribonucleoprotein K	HNRNPK	Q5T6W5;P61978-3;P61978;P61978-2;Q5T6W2;Q5T6W1	236;247;271;271;247;202
631	di	R	0.999997	7	PVGFPMR(1)GR(1)GGFDR	0.22577	MMFDDRRGRPVGFPMRGRGGFDRMPPGRGGR	Q5T6W5	221	Heterogeneous nuclear ribonucleoprotein K	HNRNPK	Q5T6W5;P61978-3;P61978;P61978-2;Q5T6W2;Q5T6W1	221;232;256;256;232;187
632	di	R	0.999989	9	PVGFPMR(1)GR(1)GGFDR	0.22577	FDDRRGRPVGFPMRGRGGFDRMPPGRGGRPM	Q5T6W5	223	Heterogeneous nuclear ribonucleoprotein K	HNRNPK	Q5T6W5;P61978-3;P61978;P61978-2;Q5T6W2;Q5T6W1	223;234;258;258;234;189
633	di	R	0.923467	11	RPGVGAGAGGR(0.923)GGGR(0.077)	-0.20261	VKKGRRPGVGAGAGGRGGGRNRRALGEANGV	Q6NUQ4-2	29	Transmembrane protein 214	TMEM214	Q6NUQ4-2;Q6NUQ4	29;29
634	di	R	0.999983	3	QVR(1)NYIK	-3.9728	IIELNCLTDEKLKQVRNYIKEHSPRQRPARE	Q6PEV8-2	245	Protein FAM199X	FAM199X	Q6PEV8-2;Q6PEV8	245;245
635	di	R	0.874788	6	VQVGCR(0.875)ELR(0.125)	-3.8849	SNTGLDRNTRVQVGCRELRSTKYISDGQCTS	Q6X4U4	76	Sclerostin domain-containing protein 1	SOSTDC1	Q6X4U4;Q6X4U4-2	76;100
636	di	R	0.956277	11	SFDEVEGVFGR(0.956)GGGR(0.044)	-1.3277	GFYQRSFDEVEGVFGRGGGREMHRSQSWEER	Q6Y7W6-4	149	PERQ amino acid-rich with GYF domain-containing protein 2	GIGYF2	Q6Y7W6-4;Q6Y7W6-5;Q6Y7W6;I1E4Y6;Q6Y7W6-3;E7ESB6;C9JW88	149;149;149;149;149;149;64
637	di	R	0.999999	16	AAAAAAAAAAGAAGGR(1)GSGPGR	0.18611	AAAAAAAAAAGAAGGRGSGPGRRRHLVPGAG	Q86U42-2	17	Polyadenylate-binding protein 2	PABPN1	Q86U42-2;Q86U42	17;17
638	di	R	1	2	SR(1)FYSGFNSR(1)PR(1)	-0.57845	ARYRARTTNYNSSRSRFYSGFNSRPRGRVYR	Q86U42-2	279	Polyadenylate-binding protein 2	PABPN1	Q86U42-2;Q86U42;B4DEH8;G3V4T2;Q92843-2;H0YJH9	279;279;151;151;306;79
639	di	R	1	10	SR(1)FYSGFNSR(1)PR(1)	-0.57845	NYNSSRSRFYSGFNSRPRGRVYRSG______	Q86U42-2	287	Polyadenylate-binding protein 2	PABPN1	Q86U42-2;Q86U42;B4DEH8;G3V4T2;Q92843-2;H0YJH9	287;287;159;159;314;87
640	di	R	1	12	SR(1)FYSGFNSR(1)PR(1)	-0.57845	NSSRSRFYSGFNSRPRGRVYRSG________	Q86U42-2	289	Polyadenylate-binding protein 2	PABPN1	Q86U42-2;Q86U42;B4DEH8;G3V4T2;Q92843-2;H0YJH9	289;289;161;161;316;89
641	di	R	1	2	YR(1)AR(1)TTNYNSSR	0.4158	PGISTTDRGFPRARYRARTTNYNSSRSRFYS	Q86U42-2	267	Polyadenylate-binding protein 2	PABPN1	Q86U42-2;Q86U42;B4DEH8;G3V4T2;Q92843-2;H0YJH9	267;267;139;139;294;67
642	di	R	1	4	YR(1)AR(1)TTNYNSSR	0.4158	ISTTDRGFPRARYRARTTNYNSSRSRFYSGF	Q86U42-2	269	Polyadenylate-binding protein 2	PABPN1	Q86U42-2;Q86U42;B4DEH8;G3V4T2;Q92843-2;H0YJH9	269;269;141;141;296;69
643	di	R	1	7	AGSQGGR(1)GGGAQAAAR	1.0239	RGGGRGRGRAGSQGGRGGGAQAAARVNRGGG	Q86V81	38	THO complex subunit 4	ALYREF	Q86V81;E9PB61	38;45
644	di	R	1	2	NR(1)GAGGFGGGGGTRR	-2.0336	RRPAQSVNRGGMTRNRGAGGFGGGGGTRRGT	Q86V81	204	THO complex subunit 4	ALYREF	Q86V81;E9PB61	204;211
645	di	R	1	5	PAIAR(1)GAAGGGGR	-0.17862	VNRGGGPIRNRPAIARGAAGGGGRNRPAPYS	Q86V81	63	THO complex subunit 4	ALYREF	Q86V81;E9PB61	63;70
646	di	R	1	7	PAQSVNR(1)GGMTR	0.18027	TSQIDAQRRPAQSVNRGGMTRNRGAGGFGGG	Q86V81	197	THO complex subunit 4	ALYREF	Q86V81;E9PB61	197;204
647	di	R	0.99981	3	VNR(1)GGGPIR	-0.41378	QGGRGGGAQAAARVNRGGGPIRNRPAIARGA	Q86V81	50	THO complex subunit 4	ALYREF	Q86V81;E9PB61	50;57
648	di	R	1	10	LTAEEMDEQR(1)R(1)	-0.84569	WAAYERLTAEEMDEQRRQNVAYQYLCRLEEA	Q86VI3	25	Ras GTPase-activating-like protein IQGAP3	IQGAP3	Q86VI3	25
649	di	R	1	11	LTAEEMDEQR(1)R(1)	-0.84569	AAYERLTAEEMDEQRRQNVAYQYLCRLEEAK	Q86VI3	26	Ras GTPase-activating-like protein IQGAP3	IQGAP3	Q86VI3	26
650	di	R	1	10	VCTILADSCR(1)	-0.0007509	MSSTKRVCTILADSCRAQAHAADRGERGHFG	Q8N8G6	147	Putative uncharacterized protein C15orf54	C15orf54	Q8N8G6	147
651	di	R	0.804551	20	EAGPGRVEPGSLESSPGLGR(0.805)GR(0.195)	0.53397	GRVEPGSLESSPGLGRGRKNSFGYRKKREEK	Q92615	493	La-related protein 4B	LARP4B	Q92615;H0Y4V9	493;59
652	di	R	1	2	NR(1)PPFGQGYTQPGPGYR	1.095	TMTPPPSGPNPYARNRPPFGQGYTQPGPGYR	Q92734-2	381	Protein TFG	TFG	Q92734-2;Q92734	381;385
653	di	R	0.750984	11	GPMTGSSGGDR(0.751)GGFK(0.249)	-0.6971	DKDGRGPMTGSSGGDRGGFKNFGGHRDYGPR	Q92804-2	203	TATA-binding protein-associated factor 2N	TAF15	Q92804-2;Q92804;K7EPT6;K7EL85	203;206;115;203
654	di	R	0.969152	10	GYGGSQGGGR(0.969)GR(0.031)	-1.096	YGEDNRGYGGSQGGGRGRGGYDKDGRGPMTG	Q92804-2	182	TATA-binding protein-associated factor 2N	TAF15	Q92804-2;Q92804;K7EPT6;K7EL85;K7ENI1	182;185;94;182;94
655	di	R	0.999831	6	RPEFMR(1)GGGSGGGR	-2.364	NIIKVSFATRRPEFMRGGGSGGGRRGRGGYR	Q92804-2	323	TATA-binding protein-associated factor 2N	TAF15	Q92804-2;Q92804;K7EPT6	323;326;235
656	di	R	1	2	SR(1)GGYGGDR(1)GGGSGYGGDR	-1.1661	GGYGGDRGGYGGDRSRGGYGGDRGGGSGYGG	Q92804-2	525	TATA-binding protein-associated factor 2N	TAF15	Q92804-2;Q92804;K7EKB2	525;528;150
657	di	R	1	9	SR(1)GGYGGDR(1)GGGSGYGGDR	-1.1661	GGYGGDRSRGGYGGDRGGGSGYGGDRSGGYG	Q92804-2	532	TATA-binding protein-associated factor 2N	TAF15	Q92804-2;Q92804;K7EKB2	532;535;157
658	di	R	0.870411	9	MRGGGFGDR(0.87)DR(0.13)	-0.93505	_______MRGGGFGDRDRDRDRGGFGARGGG	Q92841-1	9	Probable ATP-dependent RNA helicase DDX17	DDX17	Q92841-1;Q92841-3;C9JMU5;Q92841-2	9;9;9;9
659	di	R	0.982469	5	MPEIR(0.982)MALFGANTNR(0.018)	0.61925	ESRLDLSAKQKMPEIRMALFGANTNRKFFI_	Q96A05	212	V-type proton ATPase subunit E 2	ATP6V1E2	Q96A05	212
660	di	R	0.99922	3	LPR(0.999)GQGAYR(0.001)PGTR	2.7846	RSKGRTPGSSYPRLPRGQGAYRPGTRRESLG	Q96BH1	437	E3 ubiquitin-protein ligase RNF25	RNF25	Q96BH1	437
661	di	R	0.999999	8	DSYSSSSR(1)GAPR(1)GAGPGGSR	-1.0082	ERGYPSSRDSYSSSSRGAPRGAGPGGSRSDR	Q96E39	368	RNA binding motif protein, X-linked-like-1	RBMXL1	Q96E39	368
662	di	R	0.999753	12	DSYSSSSR(1)GAPR(1)GAGPGGSR	-1.0082	PSSRDSYSSSSRGAPRGAGPGGSRSDRGGGR	Q96E39	372	RNA binding motif protein, X-linked-like-1	RBMXL1	Q96E39	372
663	di	R	1	5	LLIPR(1)WR(1)	-1.6577	SSLEGWTGQDRLLIPRWREARSLSWMQSPDL	Q96M42	40	Putative uncharacterized protein encoded by LINC00479	LINC00479	Q96M42	40
664	di	R	1	7	LLIPR(1)WR(1)	-1.6577	LEGWTGQDRLLIPRWREARSLSWMQSPDLES	Q96M42	42	Putative uncharacterized protein encoded by LINC00479	LINC00479	Q96M42	42
665	di	R	0.387716	12	GGPGPGPGPYHR(0.388)GR(0.388)GGR(0.225)	-0.4227	GPMRGGPGPGPGPYHRGRGGRGGNEPPPPPP	Q96QC0	705	Serine/threonine-protein phosphatase 1 regulatory subunit 10	PPP1R10	Q96QC0	705
666	di	R	0.387716	14	GGPGPGPGPYHR(0.388)GR(0.388)GGR(0.225)	-0.4227	MRGGPGPGPGPYHRGRGGRGGNEPPPPPPPF	Q96QC0	707	Serine/threonine-protein phosphatase 1 regulatory subunit 10	PPP1R10	Q96QC0	707
667	di	R	1	11	STVDAPTAAGR(1)GR(1)	0.8008	IKNPRSTVDAPTAAGRGRGRGRPH_______	Q99832	535	T-complex protein 1 subunit eta	CCT7	Q99832;Q99832-3;F5GZK5;Q99832-4;B7Z1C9;Q99832-2	535;491;435;448;407;331
668	di	R	1	13	STVDAPTAAGR(1)GR(1)	0.8008	NPRSTVDAPTAAGRGRGRGRPH_________	Q99832	537	T-complex protein 1 subunit eta	CCT7	Q99832;Q99832-3;F5GZK5;Q99832-4;B7Z1C9;Q99832-2	537;493;437;450;409;333
669	di	R	0.813826	12	SDGFDR(0.002)APGAGR(0.814)GR(0.184)	1.1809	___MSDGFDRAPGAGRGRSRGLGRGGGGPEG	Q9H074	13	Polyadenylate-binding protein-interacting protein 1	PAIP1	Q9H074;D6R9H8	13;13
670	di	R	0.790532	11	LLALSGPGGGR(0.791)GR(0.791)GSLLLR(0.419)	0.17183	PIQARLLALSGPGGGRGRGSLLLRRGFSDSG	Q9H307	54	Pinin	PNN	Q9H307;G3V5F0;G3V579	54;54;54
671	di	R	0.790532	13	LLALSGPGGGR(0.791)GR(0.791)GSLLLR(0.419)	0.17183	QARLLALSGPGGGRGRGSLLLRRGFSDSGGG	Q9H307	56	Pinin	PNN	Q9H307;G3V5F0;G3V579	56;56;56
672	di	R	1	13	AAAAAAAVAGVGR(1)GGGGAEPR	0.27499	__MAAAAAAAVAGVGRGGGGAEPRQERSRAR	Q9H3H3-2	14			Q9H3H3-2;Q9H3H3-3	14;14
673	di	R	0.435868	10	TGILQEAR(0.282)R(0.282)R(0.436)	0.13867	SVPAARTGILQEARRRGTRKQMFRPGKEETK	Q9H987-2	406	Synaptopodin 2-like protein	SYNPO2L	Q9H987-2;Q9H987	406;630
674	di	R	1	5	LGSGR(1)GTGQMEGR	0.15719	GPPPRGGMAQKLGSGRGTGQMEGRFTGQRR_	Q9UN86-2	435	Ras GTPase-activating protein-binding protein 2	G3BP2	Q9UN86-2;Q9UN86	435;468
675	di	R	0.999987	5	AVAPR(1)MGLR	0.14115	LRGQNLLRGGRAVAPRMGLRRGGVRGRGGPG	X6R700	123	Chromatin target of PRMT1 protein	CHTOP	X6R700;Q9Y3Y2;Q9Y3Y2-3	123;148;149
676	di	R	1	10	LGRPIGALAR(1)GAIGGR	-0.36007	SNIQARLGRPIGALARGAIGGRGLPIIQRGL	X6R700	72	Chromatin target of PRMT1 protein	CHTOP	X6R700;Q9Y3Y2;Q9Y3Y2-3;Q9Y3Y2-4;Q5T7Y7	72;97;98;97;58
677	Tri	K	0.999997	13	QEQRK(1)QNDIIPGK	-3.3115	KSSIERKYKPRQEQRKQNDIIPGKNNLSNVE	B1AL16	291	Protein FAM178A	FAM178A	B1AL16;Q8IX21;Q8IX21-2	291;291;291
678	Tri	K	0.990884	11	LTEAK(0.991)PVDK(0.009)VK	-0.18761	IAKERTHFTVRLTEAKPVDKVKLIKEIKNYI	B4DLN1	138	39S ribosomal protein L12, mitochondrial	MRPL12	B4DLN1;P52815	138;138
679	Tri	K	1	9	EYTINIHK(1)R	0.15178	AINEVVTREYTINIHKRIHGVGFKKRAPRAL	H7C2W9	19	60S ribosomal protein L31	RPL31	H7C2W9;C9JU56;B7Z4E3;B7Z4C8;P62899-3;P62899;P62899-2;B8ZZK4	19;31;31;31;31;31;31;31
680	Tri	K	0.977552	16	SGALDVLQMK(0.978)EEDVLK(0.022)	-2.2931	_____MSGALDVLQMKEEDVLKFLAAGTHLG	C9J9K3	11	40S ribosomal protein SA	RPSA;RPSAP58	C9J9K3;P08865;A6NE09;C9JQR9	11;11;11;11
681	Tri	K	1	10	DFSLRMEK(1)YR	-2.0719	TAVDKRYRDFSLRMEKYRTSLEKALGISSDS	F5H228	1188	Triple functional domain protein	TRIO	F5H228;E7EWP2;E7EPJ7;O75962-5;O75962-2;O75962-4;O75962	1188;1178;970;1237;1237;1178;1237
682	Tri	K	1	8	NGK(1)GRHVR	-0.79666	LLLETLQTICFYKNGKGRHVRNLHKTVMQNG	E7EPT4	21		NDUFV2	E7EPT4	21
683	Tri	K	1	16	GIYAYGFEK(1)PSAIQQR	0.08425	LKESLLRGIYAYGFEKPSAIQQRAIIPCIKG;LREDLLRGIYAYGFEKPSAIQQRAIKQIIKG;LSESLLRGIYAYGFEKPSAIQQRAILPCIKG	P60842	54	Eukaryotic initiation factor 4A-II;Eukaryotic initiation factor 4A-III;Eukaryotic initiation factor 4A-III, N-terminally processed;Eukaryotic initiation factor 4A-I	EIF4A2;EIF4A3;EIF4A1	E7EQG2;Q14240;Q14240-2;J3KSN7;E7EMV8;E9PBH4;F8WE11;P38919;I3L3H2;P60842;J3KT12;P60842-2;J3KTB5;J3QS69;J3QR64;J3QL43;J3QLN6;J3QKZ9;J3KS25;B4E102;J3KT04;J3KS93;J3QQP0	55;55;56;38;55;55;56;60;60;54;54;54;38;54;65;54;18;18;52;38;55;38;54
684	Tri	K	1	10	EK(1)ALRPEVER	0.57285	EKEWGKLIIAMLEREKALRPEVERLEMLQQI	E7ERU0	374	Dystonin	DST	E7ERU0;E9PHM6;F8W9J4;E7ERU2;E9PEB9;Q03001;Q5T0V7;E7ETB9;F6QMI7;Q03001-13	374;374;374;374;552;374;552;414;374;490
685	Tri	K	1	7	VFEK(1)YGR	0.15462	LTYRTSPDTLRRVFEKYGRVGDVYIPRDRYT	J3KP15	36	Serine/arginine-rich splicing factor 2;Serine/arginine-rich splicing factor 8	SRSF2;SRSF8	J3KP15;Q01130;J3QL05;B4DN89;Q9BRL6-2;Q9BRL6	36;36;36;36;36;36
686	Tri	K	1	8	VNSK(1)AEVR	0.57191	RSSGPGGQNVNKVNSKAEVRFHLATAEWIAE	J3KS15	98	Peptidyl-tRNA hydrolase ICT1, mitochondrial	ICT1	J3KS15;Q14197	98;98
687	Tri	K	1	9	YK(1)EENLVRR	-0.45483	LTVGFMRHHTQSIKYKEENLVRRTLFITGLP	O94886	221	CSC1-like protein 1	TMEM63A	O94886	221
688	Tri	K	0.99713	11	LEK(0.997)PAK(0.003)YDDIK	1.1256	PTANVSVVDLTCRLEKPAKYDDIKKVVKQAS	P04406	251	Glyceraldehyde-3-phosphate dehydrogenase	GAPDH	P04406;P04406-2;E7EUT5	251;209;176
689	Tri	K	1	12	VVDLMAHMASK(1)E	1.1504	GYSNRVVDLMAHMASKE______________	P04406	334	Glyceraldehyde-3-phosphate dehydrogenase	GAPDH	P04406;P04406-2;E7EUT5	334;292;259
690	Tri	K	1	10	QIFLGGVDK(1)R	0.24308	AFKDKYKQIFLGGVDKRTQFWLYFAGNLASG	P05141	105	ADP/ATP translocase 2;ADP/ATP translocase 2, N-terminally processed	SLC25A5	P05141	105
691	Tri	K	1	11	QYK(1)GIIDCVVR	0.82193	QVQHASKQITADKQYKGIIDCVVRIPKEQGV	P05141	52	ADP/ATP translocase 2;ADP/ATP translocase 2, N-terminally processed	SLC25A5	P05141	52
692	Tri	K	0.996932	21	ADK(0.003)DYHFK(0.997)VDNDENEHQLSLR	-0.021879	YLFGCELKADKDYHFKVDNDENEHQLSLRTV	P06748-2	32	Nucleophosmin	NPM1	P06748-2;P06748;P06748-3	32;32;32
693	Tri	K	0.5	11	GPSSVEDIK(0.5)AK(0.5)	0.033681	KTPKTPKGPSSVEDIKAKMQASIEKGGSLPK	P06748-2	219	Nucleophosmin	NPM1	P06748-2;P06748;P06748-3	219;248;248
694	Tri	K	0.5	11	GPSSVEDIK(0.5)AK(0.5)	0.033681	PKTPKGPSSVEDIKAKMQASIEKGGSLPKVE	P06748-2	221	Nucleophosmin	NPM1	P06748-2;P06748;P06748-3	221;250;250
695	Tri	K	1	8	LLSISGK(1)R	-0.062118	EDEEEEDVKLLSISGKRSAPGGGSKVPQKKV	P06748-2	141	Nucleophosmin	NPM1	P06748-2;P06748;P06748-3;E5RI98	141;141;141;77
696	Tri	K	1	11	AGITTIEAVK(1)R	1.5375	_____MAGITTIEAVKRKIQVLQQQADDAEE	P06753-2	11	Tropomyosin alpha-3 chain	TPM3	P06753-2;Q5VU59;P06753-5;P06753-3;P06753-6;P06753-4;Q5VU61;D6R904;D6RFM2	11;11;11;11;11;11;11;11;11
697	Tri	K	0.997662	11	LK(0.998)DDEVAQLK(0.002)K(0.001)	-0.12035	ILNARGLTSVINQKLKDDEVAQLKKSADTLW	P07195	310	L-lactate dehydrogenase B chain	LDHB	P07195	310
698	Tri	K	0.977094	9	KTK(0.977)FENLCK(0.023)	0.75675	PEDEEEKKKQEEKKTKFENLCKIMKDILEKK	P07900	567	Heat shock protein HSP 90-alpha;Putative heat shock protein HSP 90-alpha A5	HSP90AA1;HSP90AA5P	P07900;P07900-2;Q86U12;Q58FG0	567;689;388;252
699	Tri	K	0.841528	9	DLEK(0.842)MMVK(0.158)R	-0.25323	PDKRPVFADISKDLEKMMVKRRDYLDLAAST	P07949-2	1007	Proto-oncogene tyrosine-protein kinase receptor Ret;Soluble RET kinase fragment;Extracellular cell-membrane anchored RET cadherin 120 kDa fragment	RET	P07949-2;P07949	1007;1007
700	Tri	K	1	8	LSK(1)EEIER	1.3991	KANKITITNDKGRLSKEEIERMVQEAEKYKA	P08107	512	Heat shock 70 kDa protein 1A/1B	HSPA1A	P08107;P08107-2;E7EP94;V9GZ37	512;457;421;347
701	Tri	K	1	16	SSGPYGGGGQYFAK(1)PR	0.27299	GRSSGPYGGGGQYFAKPRNQGGYGGSSSSSS	P09651-2	298	Heterogeneous nuclear ribonucleoprotein A1;Heterogeneous nuclear ribonucleoprotein A1, N-terminally processed	HNRNPA1	P09651-2;P09651;F8W6I7;P09651-3;H0YH80	298;350;285;245;169
702	Tri	K	0.5	10	MIFDVESMK(0.5)K(0.5)	-2.5316	PVQDLIKMIFDVESMKKAMVEYEIDLQKMPL	P09874	683	Poly [ADP-ribose] polymerase 1	PARP1	P09874	683
703	Tri	K	0.5	10	MIFDVESMK(0.5)K(0.5)	-2.5316	VQDLIKMIFDVESMKKAMVEYEIDLQKMPLG	P09874	684	Poly [ADP-ribose] polymerase 1	PARP1	P09874	684
704	Tri	K	1	15	ALAAAGYDVEK(1)NNSR	-0.61478	AALKKALAAAGYDVEKNNSRIKLGLKSLVSK	P16403	75	Histone H1.4;Histone H1.3;Histone H1.2;Histone H1.1;Histone H1t	HIST1H1E;HIST1H1D;HIST1H1C;HIST1H1A;HIST1H1T	P10412;P16402;P16403;Q02539;P22492	75;76;75;78;79
705	Tri	K	0.5	10	SGVSLAALK(0.5)K(0.5)	-0.46945	VAASKERSGVSLAALKKALAAAGYDVEKNNS	P16403	63	Histone H1.4;Histone H1.3;Histone H1.2	HIST1H1E;HIST1H1D;HIST1H1C	P10412;P16402;P16403	63;64;63
706	Tri	K	1	8	IGIEIIK(1)R	0.66963	LTPANEDQKIGIEIIKRTLKIPAMTIAKNAG	P10809	469	60 kDa heat shock protein, mitochondrial	HSPD1	P10809	469
707	Tri	K	1	7	FSEVLK(1)R	0.18688	KLPNLGKHEKFSEVLKRLRLQKRGTGGVDTA	P12277	313	Creatine kinase B-type	CKB	P12277;H0YJG0;H0YJK0	313;111;64
708	Tri	K	1	7	LVEGLK(1)R	-0.58324	EAKNPADLPKLVEGLKRLAKSDPMVQCIIEE	P13639	525	Elongation factor 2	EEF2	P13639	525
709	Tri	K	0.673236	20	SETAPAAPAAAPPAEK(0.673)APVK(0.327)	-0.21549	SETAPAAPAAAPPAEKAPVKKKAAKKAGGTP	P16403	17	Histone H1.2	HIST1H1C	P16403	17
710	Tri	K	1	8	AIFAGYK(1)R	1.0278	_MSGRLWSKAIFAGYKRGLRNQREHTALLKI	P18077	15	60S ribosomal protein L35a	RPL35A	P18077;C9K025;F8WBS5;F8WB72	15;15;15;15
711	Tri	K	1	9	SVNELIYK(1)R	0.015672	AWGYPNLKSVNELIYKRGYGKINKKRIALTD	P18124	156	60S ribosomal protein L7	RPL7	P18124;A8MUD9	156;116
712	Tri	K	1	12	GIVEFASK(1)PAAR	-1.021	DRGRSTGKGIVEFASKPAARKAFERCSEGVF	P23246	421	Splicing factor, proline- and glutamine-rich	SFPQ	P23246;P23246-2	421;421
713	Tri	K	1	8	K(1)IETTLAK	2.9897	KNCWEEDPEKRPDFKKIETTLAKIFGLFHDQ	P25092	740	Heat-stable enterotoxin receptor	GUCY2C	P25092	740
714	Tri	K	0.999993	10	AK(1)DPFAHLPK	0.10981	EMDECEQALAAEPKAKDPFAHLPKSTFVLDE	P26641	277	Elongation factor 1-gamma	EEF1G	P26641;B4DTG2	277;327
715	Tri	K	1	9	MEK(1)TELIQK	0.38729	_____________MEKTELIQKAKLAEQAER	P27348	3	14-3-3 protein theta	YWHAQ	P27348;E9PG15	3;3
716	Tri	K	0.5	10	VVFVFGPDK(0.5)K(0.5)	0.68399	GMPVTARVVFVFGPDKKLKLSILYPATTGRN	P30041	141	Peroxiredoxin-6	PRDX6	P30041	141
717	Tri	K	1	8	LVGMPAK(1)R	0.89078	VAFTADGERLVGMPAKRQAVTNPNNTFYATK	P38646	106	Stress-70 protein, mitochondrial	HSPA9	P38646;D6RJI2;D6RA73	106;37;37
718	Tri	K	1	10	EK(1)THGEVERR	0.68407	IIFIDELDAIAPKREKTHGEVERRIVSQLLT	P55072	315	Transitional endoplasmic reticulum ATPase	VCP	P55072	315
719	Tri	K	1	10	K(1)ESYSVYVYK	0.095921	TKAQKKDGKKRKRSRKESYSVYVYKVLKQVH;TKAQKKDGRKRKRSRKESYSVYVYKVLKQVH	U3KQK0	35	Histone H2B type F-S;Histone H2B;Histone H2B type 1-M;Histone H2B type 1-N;Histone H2B type 1-H;Histone H2B type 2-F;Histone H2B type 1-C/E/F/G/I;Histone H2B type 1-D;Histone H2B type 1-L	H2BFS;HIST1H2BN;HIST1H2BM;HIST1H2BH;HIST2H2BF;HIST1H2BC;HIST1H2BD;HIST1H2BL	P57053;U3KQK0;Q99879;Q99877;Q93079;Q5QNW6;P62807;P58876;Q5QNW6-2;B4DR52;Q99880	35;35;35;35;35;35;35;35;35;35;35
720	Tri	K	1	13	DNIQGITK(1)PAIRR	-1.2359	KRHRKVLRDNIQGITKPAIRRLARRGGVKRI	P62805	32	Histone H4	HIST1H4A	P62805	32
721	Tri	K	1	13	TVTAMDVVYALK(1)R	-1.3118	AKRKTVTAMDVVYALKRQGRTLYGFGG____	P62805	92	Histone H4	HIST1H4A	P62805	92
722	Tri	K	0.981624	12	ALSTGEK(0.982)GFGYK(0.018)	0.81712	VPKTAENFRALSTGEKGFGYKGSCFHRIIPG	P62937	44	Peptidyl-prolyl cis-trans isomerase A;Peptidyl-prolyl cis-trans isomerase A, N-terminally processed;Peptidyl-prolyl cis-trans isomerase	PPIA	P62937;F8WE65;C9J5S7	44;44;44
723	Tri	K	1	15	SIYGEK(1)FEDENFILK	1.5245	FTRHNGTGGKSIYGEKFEDENFILKHTGPGI	P62937	82	Peptidyl-prolyl cis-trans isomerase A;Peptidyl-prolyl cis-trans isomerase A, N-terminally processed;Peptidyl-prolyl cis-trans isomerase	PPIA	P62937;F8WE65;C9J5S7;Q567Q0	82;82;82;22
724	Tri	K	0.999994	9	MDK(1)NELVQK	1.6032	_____________MDKNELVQKAKLAEQAER	P63104	3	14-3-3 protein zeta/delta	YWHAZ	P63104;E7EX29;E7ESK7;E5RGE1;E5RIR4;E9PD24;E7EVZ2	3;3;3;3;3;3;3
725	Tri	K	1	12	MDSTEPPYSQK(1)R	-0.28826	VGVNKMDSTEPPYSQKRYEEIVKEVSTYIKK	P68104	165	Elongation factor 1-alpha 1;Putative elongation factor 1-alpha-like 3	EEF1A1;EEF1A1P5	P68104;Q5VTE0	165;165
726	Tri	K	1	9	NVSVK(1)DVRR	-0.24313	LPGDNVGFNVKNVSVKDVRRGNVAGDSKNDP	P68104	318	Elongation factor 1-alpha 1;Putative elongation factor 1-alpha-like 3	EEF1A1;EEF1A1P5	P68104;Q5VTE0	318;318
727	Tri	K	0.999283	7	TIEK(0.999)FEK(0.001)	0.275	HLIYKCGGIDKRTIEKFEKEAAEMGKGSFKY	P68104	41	Elongation factor 1-alpha 1;Putative elongation factor 1-alpha-like 3;Elongation factor 1-alpha 2	EEF1A1;EEF1A1P5;EEF1A2	P68104;Q5VTE0;A6PW80;Q5JR01;Q05639	41;41;41;41;41
728	Tri	K	1	12	LDHK(1)FDLMYAKR	-0.99172	SNTTAIAEAWARLDHKFDLMYAKRAFVHWYV	P68363	394	Tubulin alpha-1B chain;Tubulin alpha-4A chain;Tubulin alpha-1A chain;Tubulin alpha-3C/D chain	TUBA1B;TUBA4A;TUBA1A;TUBA3C;TUBA8	P68363;P68366-2;P68366;Q71U36-2;Q71U36;Q13748;V9GZ17	394;379;394;359;394;394;152
729	Tri	K	1	12	LDHKFDLMYAK(1)R	0.33237	EAWARLDHKFDLMYAKRAFVHWYVGEGMEEG	P68363	401	Tubulin alpha-1B chain;Tubulin alpha-4A chain;Tubulin alpha-1A chain;Tubulin alpha-3C/D chain	TUBA1B;TUBA4A;TUBA1A;TUBA3C;TUBA8	P68363;P68366-2;P68366;Q71U36-2;Q71U36;Q13748;V9GZ17	401;386;401;366;401;401;159
730	Tri	K	1	11	EIAQDFK(1)TDLR	-0.74767	KLPFQRLVREIAQDFKTDLRFQSSAVMALQE	Q71DI3	80	Histone H3.2;Histone H3.1t;Histone H3.1;Histone H3;Histone H3.3	HIST2H3A;HIST3H3;HIST1H3A;H3F3B;H3F3A	Q71DI3;Q16695;P68431;K7EK07;P84243;K7EMV3;B4DEB1;K7ES00	80;80;80;80;80;80;80;80
731	Tri	K	0.722915	13	SAPATGGVK(0.723)K(0.277)PHR	0.58292	ATKAARKSAPATGGVKKPHRYRPGTVALREI	Q71DI3	37	Histone H3.2;Histone H3.1t;Histone H3.1;Histone H3	HIST2H3A;HIST3H3;HIST1H3A;HIST2H3PS2	Q71DI3;Q16695;P68431;Q5TEC6	37;37;37;37
732	Tri	K	0.5	13	SAPATGGVK(0.5)K(0.5)PHR	-1.0169	TKAARKSAPATGGVKKPHRYRPGTVALREIR	Q71DI3	38	Histone H3.2;Histone H3.1t;Histone H3.1;Histone H3	HIST2H3A;HIST3H3;HIST1H3A;HIST2H3PS2	Q71DI3;Q16695;P68431;Q5TEC6	38;38;38;38
733	Tri	K	1	8	MYEEHLK(1)R	0.31147	NECMEGVCKMYEEHLKRMNPNSPSITYDISQ	P84090	41	Enhancer of rudimentary homolog	ERH	P84090;G3V279	41;41
734	Tri	K	0.5	8	MMVAGFK(0.5)K(0.5)	-0.55562	LGTNTIMDKMMVAGFKKQMADTGKLNTLLQR	Q00839-2	524	Heterogeneous nuclear ribonucleoprotein U	HNRNPU	Q00839-2;Q00839	524;543
735	Tri	K	0.74001	15	DISELPK(0.26)GNK(0.74)EDSLK	1.1912	KITHGKDISELPKGNKEDSLKKIKRTPSATF	Q03164-2	249	Histone-lysine N-methyltransferase 2A;MLL cleavage product N320;MLL cleavage product C180	KMT2A	Q03164-2;Q03164;Q03164-3;E9PR05	249;249;249;282
736	Tri	K	1	9	NVSVK(1)DIRR	-0.43134	LPGDNVGFNVKNVSVKDIRRGNVCGDSKSDP	Q05639	318	Elongation factor 1-alpha 2	EEF1A2	Q05639	318
737	Tri	K	1	9	INTLFQK(1)DR	-0.43354	DSWDRGIPRINTLFQKDRHTLAYDKGWRVRT	Q6P2Q9	1425	Pre-mRNA-processing-splicing factor 8	PRPF8	Q6P2Q9;I3L3Z8	1425;69
738	Tri	K	0.999975	15	DFKITCGK(1)VDAVDLR	0.706	RLALREQKDFKITCGKVDAVDLREYVDICWV	Q7Z3T8	1372	Zinc finger FYVE domain-containing protein 16	ZFYVE16	Q7Z3T8	1372
739	Tri	K	0.5	12	TSGEIIRCEK(0.5)CK(0.5)	2.6708	GVEIEKTSGEIIRCEKCKRERELQQSLERER	Q9C098	141	Serine/threonine-protein kinase DCLK3	DCLK3	Q9C098	141
740	Tri	K	0.5	12	TSGEIIRCEK(0.5)CK(0.5)	2.6708	EIEKTSGEIIRCEKCKRERELQQSLERERLS	Q9C098	143	Serine/threonine-protein kinase DCLK3	DCLK3	Q9C098	143
741	Tri	K	0.99999	14	IINYPHDMK(1)PSAVK	1.0086	KHTLTYRIINYPHDMKPSAVKDSIYNAVSIW	Q9NRE1	116	Matrix metalloproteinase-26	MMP26	Q9NRE1	116
742	Tri	K	1	9	MEAGEGK(1)ER	0.22324	_________MEAGEGKERVPKQRQVLIFFVL	Q9Y5E7	7	Protocadherin beta-2	PCDHB2	Q9Y5E7	7
